# Supplementary material for: Construction of a High-Density Genetic Map and Analysis of Seed-Related Traits Using Specific Length Amplified Fragment Sequencing for Cucurbita maxima
Source: Front Plant Sci. 2020 Feb 21;10:1782. doi: 10.3389/fpls.2019.01782 (PMC7046561; doi:10.3389/fpls.2019.01782)
Supplement: Supplementary file 10 [file Table_3.xlsx]

## Sheet: phenotype 
Table S3. Phenotype and genotype of 150 F2 individuals and F2:3 for QTL with CAPS markers
No.	Seed length of F2 in 2017	Seed width of F2 in 2017	Average seed length of F2:3 in 2018	Average seed width of F2:3 in 2018	Seed length of F2:3-1	Seed length of F2:3-2	Seed length of F2:3-3	Seed length of F2:3-4	Seed length of F2:3-5	Seed length of F2:3-6	Seed length of F2:3-7	Seed length of F2:3-8	Seed length of F2:3-9	Seed length of F2:3-10	Seed width of F2:3-1	Seed width of F2:3-2	Seed width of F2:3-3	Seed width of F2:3-4	Seed width of F2:3-5	Seed width of F2:3-6	Seed width of F2:3-7	Seed width of F2:3-8	Seed width of F2:3-9	Seed width of F2:3-10
	(mm)	(mm)	(mm)	(mm)	(mm)	(mm)	(mm)	(mm)	(mm)	(mm)	(mm)	(mm)	(mm)	(mm)	(mm)	(mm)	(mm)	(mm)	(mm)	(mm)	(mm)	(mm)	(mm)	(mm)
1	24.7333	14.0667	24.14	13.5	23	23.8	20.8	22.4	28.6	23.4	23.1	28.1	24.3	23.9	13.9	14.2	12.4	12.6	11	13.8	15	13.4	12.8	15.9
2	20.3333	12.0667	20.6	12.41	21.3	20.2	21.7	20.2	17	22	21.4	20.4	21.2	20.6	13	11.7	13.7	13	9	13.8	13	12.1	12.7	12.1
3	19.4667	11.5333	19.94	12.17	22.6	21	20.6	18.2	18.2	19	20.4	18	19.6	21.8	13	12.3	11.4	10.8	11.9	13	12.4	12.3	10.9	13.7
4	21.3333	12	19.93	11.6	22.2	21.2	17.9	16.8	18.7	23.6	17.7	19.5	21.2	20.5	13.5	11.6	11.2	9.5	10.9	13.1	10.7	11.4	12.1	12
5	19.7333	11.2667	20.1	11.81	22.3	19.5	20.9	20.4	20.2	18.3	19.8	19.5	19.4	20.7	13.2	11.4	11	11.8	11.4	11.2	12.7	11.9	11.7	11.8
6	17.1333	9.66667	19.3	11.32	20.8	18.6	19.1	19	19.5	18.2	19.6	19	18.2	21	11.9	10.4	11.1	11.5	11.2	11	11.5	11.9	10.4	12.3
7	18.2667	10.3333	18.42	11.14	18.3	17.6	20.4	18.4	17.5	18.5	17.4	19.2	18.7	18.2	11.1	11.2	10.9	10.6	11.3	11.5	11	11.5	11.4	10.9
8	23.4333	13.1167	23.43	13.12	25	21.7	24.1	23.8	22.6	24	23	23.9	24.2	22	13.7	11.9	13	12.7	13.4	13	13.2	13.2	13.7	13.4
9	18.9333	10.2911	20.1	10.95	18.8	22	20.2	22.9	20.9	17.1	20.3	19.5	20.8	18.5	11.7	11.1	11.4	12.3	10.5	9.6	10.5	11.4	10.6	10.4
10	15.9333	8.53333	18.68	10.91	20.3	17.5	20.1	16.4	19.1	19.5	16.5	17.5	20.2	19.7	11.9	10.3	11.3	10.2	10.4	11.1	10.6	10.5	11.4	11.4
11	20.2	11.3333	20.84	12.29	20.4	18.2	22.2	22.1	20.9	21.1	19.4	22.6	21	20.5	12	10.5	12.5	12.6	13	12.1	11	13.2	13.5	12.5
12	22.29	13.14	22.27	13.11	21.4	24.5	21.3	21.3	21.9	22.9	22.1	21.8	23.5	22	12.4	13	13.7	12.3	13.3	14	13.1	13.3	13.8	12.2
13	19.1333	11.0667	19.89	12.14	20.1	22.5	21.7	21.5	20.7	18.1	18.6	17.1	18.2	20.4	11.2	12.3	12.9	12.4	12	12	12	13.5	11.3	11.8
14	18.5333	11.7333	19.33	12.57	19.6	20.4	20.9	20.5	18.9	18.3	18.2	16.2	18.9	21.4	12.3	13.4	12.8	13.7	11.9	12	11.8	11.5	12.5	13.8
15	21.9333	10.9333	22.09	12.03	21.9	21.1	22.2	22	23	22.9	23.6	18.1	21.8	24.3	12.6	11.3	12.7	11.5	12.4	11.3	12.7	11.3	11.8	12.7
16	20.5333	11	20.78	11.84	18.8	19.4	21.2	22.4	18.1	21	21.6	21.6	22	21.7	11.4	11.6	12	13	10.7	11.7	12.4	12.3	12.4	10.9
17	20.2667	11.4	20.55	11.95	22.9	21.3	23.2	20.1	20.7	20.3	17.4	22.7	17.4	19.5	12.5	12	12.9	11.4	12.2	12.5	10.5	12.8	11.7	11
18	21.6	12.4667	21.52	12.87	20.7	24.4	20.4	19.4	21.7	23.2	23.8	22.5	17.9	21.2	12.8	13.4	13.7	11.9	12.8	13.3	14.3	13.2	10.3	13
19	20.1333	11.8	20.18	13.12	21.6	21.9	17.5	21.6	22.3	20.2	20.1	19.6	19.1	17.9	13.6	13.5	13.2	12.9	14.6	12.4	12.4	12.1	12.7	13.8
20	19.7333	11.3333	17.74	11.3	16.7	15.3	14.8	19.7	19.7	16.8	21.2	17.3	18.3	17.6	10.6	9.8	10.2	11.6	11.8	10.1	14.9	11.4	11.6	11
21	20.3333	10.8	19.81	12.06	22	23	23.5	15.1	19.8	21.5	14.1	19.5	19.9	19.7	12.4	13.2	13.9	11	9.7	12.3	12.9	12.3	11.1	11.8
22	22.7333	12.5333	21.48	12.96	22.3	21.8	22.5	23.8	24.2	19	19.7	19.8	20.2	21.5	13.1	12.6	13.5	13	13.3	12.9	13.8	11.6	12.8	13
23	21.6	13	20.62	12.41	21	20.9	19.4	21.2	18.5	22	21.9	19.9	20.9	20.5	13	13	11.2	13.4	11.5	12.9	12.9	12.3	11.8	12.1
24	22.2667	11.8333	21.3	11.86	20.7	20.9	21.3	19.3	21.3	21	22.9	21.8	20.8	23	11.7	12.2	12	11.9	11.2	11	13.9	11.3	12.4	11
25	21.6667	12.2	21.6	12.03	23.2	22.4	21.5	21.8	23.1	22.1	19.4	21.2	22.1	19.2	11.6	12.4	12.2	12.9	12.9	12.1	11.8	11.1	12.6	10.7
26	19.4667	11.6667	18.34	11.98	19.8	18.1	18.2	19.3	15.2	17.5	21.6	18.8	17.7	17.2	11.6	12.1	12.1	13.9	9.6	12.8	12.7	12.3	11.6	11.1
27	20.428	11.86	20.43	11.86	22.3	19.6	20.7	23.4	20	17.2	18.5	20.6	20.5	21.5	11.6	10.8	11.7	12.2	12.6	11.1	12	11	11.8	13.8
28	19.8	12.8556	20.2	12.86	17.8	21.6	21.3	19.8	20.9	19.5	22.1	20.2	20.5	18.3	13.9	12.2	11.4	12.4	13.5	13.1	13.5	13	12.7	12.9
29	20.6667	11.1333	21.23	12.39	21	20.8	21.8	23.2	21.1	18.3	24.2	20.8	19.5	21.6	12.6	13.4	11.3	11.8	13.1	12.7	12.4	12.2	11.9	12.5
30	-100	-100	-100	-100	-100	-100	-100	-100	-100	-100	-100	-100	-100	-100	-100	-100	-100	-100	-100	-100	-100	-100	-100	-100
31	21.4667	12.9333	22.77	13.51	21.6	22.5	21.9	20.6	23.2	24.3	26.2	22.6	21.9	22.9	12.3	12.9	13.3	12.2	13.8	14.3	16.2	12.7	12.9	14.5
32	20.0444	12.261	20.07	12.25	18.8	18.5	20.4	22.1	18.6	17.5	23.6	20.3	18.4	22.5	12.2	11.6	12.1	12.8	13.3	11.6	14.3	12	11.4	11.2
33	23.1333	12	22.25	12.27	23.2	21.2	21.9	22.1	22.2	22.9	22	22.6	21.9	22.5	11.2	12.4	12.6	12.4	12.7	12.9	12.6	12	12.2	11.7
34	21.7333	12.4667	20.38	12.08	20	17.8	21.8	20.6	19.6	20	20.6	22	20.4	21	11.2	11.9	11.7	13.1	11.5	11.4	11.9	13.8	12	12.3
35	22.5333	11.036	22.17	11.36	22.5	19	21.9	22.2	22.4	23.4	23	23.3	21.7	22.3	12.6	11.1	12.3	12.3	11.4	12	10.3	11.3	10.3	10
36	22.4	14.2	21.55	13.3	21.9	23	22.3	23.2	21.7	19.7	21.6	19	21	22.1	12.3	13.2	13.6	12.7	13.2	14.2	13.7	13	13.3	13.8
37	18.4667	9.93333	23.81	13.27	23	26	24.2	22.5	22.3	24.7	24.3	22.9	23.7	24.5	13.6	14.7	12.8	12.4	12.6	13.1	12.6	12.8	13.7	14.4
38	16.2	10.3333	20.74	12.8	20.5	18.3	21.9	20.1	20.7	21.7	22.1	20.8	21.6	19.7	12.8	12.2	13.4	12.8	12.4	12.6	13	12.6	12.8	13.4
39	21.7333	13.37	21.2	12.37	20.9	21	21.8	21.3	21.9	19	20.4	22.4	20.6	22.7	13.6	12.1	12.8	11.7	11.5	11.5	12.4	11.8	13.2	13.1
40	20.6667	12.8	20.44	12.97	21.2	20.7	19.1	21	21.2	21.9	19.5	20.4	21.3	18.1	13	13.2	12.4	13.1	13.4	13.2	13.4	11.5	13.5	13
41	17.29	10.9	17.29	10.82	18.1	17.8	16.6	16	17.1	16.2	18.2	16.7	18.3	17.9	10.8	10.7	9.6	11	11.1	10.6	11.8	10.7	11.2	10.7
42	22.7333	12.8667	22.49	11.79	21.9	20.8	23.1	20.8	22.8	23.5	21.5	24.7	22.3	23.5	11.1	12.9	12.1	11.6	11.3	12.6	10.4	12.6	11.5	11.8
43	23.2667	14.8	21.28	13.65	24.4	20.3	16.5	22.6	23.3	19.7	20.6	22.1	21.9	21.4	13.9	13	13.9	13.8	14.1	13.6	13	13.9	14.2	13.1
44	19.7333	11.7333	20.45	12.5	17.9	20.2	23.2	21.8	21.2	21	17.1	21.2	20.9	20	11.5	12.6	11.6	13.4	13.2	11.6	12.9	13.2	12.3	12.7
45	20.9571	12.87	20.59	12.96	20.7	17.4	22.1	22.8	19.6	21.5	21.8	21.3	19.8	18.9	13.2	11.8	12.7	14.7	12.1	13.2	13	13.2	12.8	12.9
46	22.6	14.4667	21.83	13.31	22.2	20	22.1	20.6	20.9	21.4	22.5	22.6	23.7	22.3	13.6	13	13.5	11.3	14.5	13	13.4	12.9	14.3	13.6
47	24.2667	12.7333	22.12	12.02	23.7	22	23.6	23.7	22.7	19.7	23.9	17.5	22.3	22.1	12.7	12.3	12.2	11.7	12	12.3	12.4	11.5	11.9	11.2
48	21.1333	11.4667	19.49	12.12	22.6	20.2	19.5	19.7	18.3	19.1	17.4	19.7	18.9	19.5	13.7	11.4	12.4	12	12.7	12	10.7	12.1	12.1	12.1
49	21	12.5333	21.27	12.65	19.9	18.8	20.2	23.1	23.3	20.8	22.6	23.1	21.5	19.4	12.4	12.1	11.7	13.4	12.6	12.5	12.6	13.5	13.7	12
50	21.4667	13.4	21.47	13.37	23.6	20.2	21	24.4	20.9	20.2	20.1	21.8	21	21.5	14.1	13.3	12.8	14.4	13.2	11.9	11.7	14.7	14.2	13.4
51	20.1333	12.1333	20.13	11.84	21.6	20.6	21.8	18.2	18	21.8	21.3	19.6	18.1	20.3	14.6	11.8	12.2	10.1	10.3	11.9	12.8	12.8	11.2	10.7
52	20.6	13.7333	22.2	13.4	21.7	21.1	23.3	20.9	24.8	22.7	19.5	22.4	21	24.6	13	13.6	12.4	14.2	13.7	14	12.8	12.8	12.9	14.6
53	18.3667	11.3667	18.36	11.3	20.4	19.7	19.2	17.8	18.3	18	18.4	17.6	17.2	17	12	11.2	11.4	11.5	10.6	10.9	10.8	11.7	11	11.9
54	21.0375	11.25	21.08	11.29	22.7	23.8	19.9	22.4	22	20.6	20.2	17.5	20.5	21.2	11.5	11.9	12.2	11.9	10.8	11.1	11.7	10.3	10.7	10.8
55	21.2	11.7333	19.74	12.41	18.7	19.3	17.4	22.4	20	19.5	20.9	20.2	18.9	20.1	11.4	12.8	12.7	12.6	12	12.1	12.8	12.5	12.5	12.7
56	22.2	12	20.14	11.63	19.5	20.9	23.2	22.2	25.3	18.5	19.4	21.5	16.7	14.2	11.2	12.3	11.4	13.7	12.9	11.2	11.2	11.2	10.4	10.8
57	21.5333	11.5333	20.29	12.02	21.2	22.3	21.8	20.1	20.3	19.6	19.2	19.4	18.7	20.3	12.4	12	12.2	11.9	11.9	10.9	11.4	11.9	13.6	12
58	20.8	12.3333	20.58	12.31	22.3	21.1	16.8	22.2	19.5	19.5	23.8	19.2	20.8	20.6	11.6	12.1	11.1	13.8	13	12.7	13.8	11.4	11.3	12.3
59	17.8	11.4667	17.26	11.47	18.4	16.3	18.3	18	17	17.9	16.4	18	16.3	16	12.4	10.6	11.6	10.5	11.4	12.9	11.3	12.5	9.9	11.6
60	19.4667	10.5333	19.08	10.69	21.4	17.9	19.9	20.4	19.1	19.9	17.2	19	18.5	17.5	11	9.8	11.4	10.9	10.4	10.3	11.2	10.5	10.7	10.7
61	23.0667	13.4	21.44	12.98	21.1	22.3	22.5	24.4	19	21.4	21.7	23.2	21.3	17.5	13.5	11.9	13.5	13.3	12.3	12.7	13.2	13.4	13.8	12.2
62	21.5333	12.5333	21.36	12.29	18.8	22	20.9	20.3	22.8	22.9	21.7	21.5	21.7	21	10.6	13.2	12.6	11.3	13.2	12.7	12.1	12.6	12.5	12.1
63	23.8	10.6667	22.28	12.59	20.3	18.4	24.5	22.9	22.2	22.5	22.1	25.3	22.7	21.9	11.9	12.4	13.2	12.8	12.9	12.2	12.5	12.3	13	12.7
64	22.1	13.3444	22.39	13.41	23.3	21.8	22.5	22.4	23.2	22.1	22.1	22	24	20.5	13.6	13.2	13.4	13.3	13.2	13.5	13.8	12.9	14.5	12.7
65	25.6667	13.9333	22.15	13.26	26.4	20.2	25.4	21.3	21.4	19.4	21.1	21.8	25	19.5	14	12.3	15.3	12.4	13.1	12.7	13	12.5	14.6	12.7
66	22.6667	12.4667	22.75	12.5	24.4	22.9	23.8	25.4	25.2	18.5	20	23.2	21.3	22.8	13.5	12.8	13.4	13.1	11.5	11.6	12	13.6	11	12.5
67	21.9333	14.0667	21.9	12.12	22.6	24	21.8	22.3	21.7	22.6	22.2	19.5	19.1	23.2	13.2	11.2	12.5	12.6	11.5	10.7	13.8	11.8	11.8	12.1
68	22	13.3333	22.93	13.31	22.4	22.6	21.4	24.5	25	22.6	22	22.6	23.4	22.8	13.3	12.7	12.2	14.1	13.7	13	12.9	14.4	13.6	13.2
69	18.8	11.8	19.03	11.6	19.6	19	18.7	19.2	20	17.4	19.2	20	18.4	18.8	12	11.6	12.1	11.9	12.6	10.6	10.6	12.7	11.3	10.6
70	23.4	14.2	20.91	12.57	22.5	20.1	21.1	20.6	21.6	21.1	19.5	23.5	19.4	19.7	13.7	11.8	12.8	12.9	12.9	12.8	12.2	13.7	11.5	11.4
71	23.7333	13.2	21.63	12.6	19	22.7	19	21	23.4	22.2	24.2	24.5	18.7	21.6	11.9	12.7	12.1	11.3	13.4	12.3	14	14.4	11.3	12.6
72	18.4	10.8	19.09	10.45	19.2	20.4	19.1	18.7	19.1	18.7	18.6	18.9	19.4	18.8	10.1	10.1	11.7	9.7	10.1	10.3	10.1	11.5	10.8	10.1
73	20.7333	11.2	21.6	12.27	22.8	20.3	22.4	19.8	19.2	23.4	23.7	21.5	21.3	21.6	12.3	13.5	12.1	12.3	11.1	12.2	12.4	12.3	12.2	12.3
74	18.6667	10.8333	20.63	12.13	21	19.1	21	22	19.3	22.3	23	19.8	21.7	17.1	11.7	11.8	12.3	13.4	11.7	13.4	12.4	11	12.6	11
75	21.29	12.8667	21.27	13.2	19.8	22.1	22	20.8	21.9	21	20.3	21.2	20.9	22.7	12.9	13.1	12.3	13.7	13.4	13.8	13.5	13.1	12.2	14
76	-100	-100	-100	-100	-100	-100	-100	-100	-100	-100	-100	-100	-100	-100	-100	-100	-100	-100	-100	-100	-100	-100	-100	-100
77	20.5333	12.39	20.52	12.41	22.8	17.8	21.5	20.5	19.5	19	20.9	22.2	20.2	20.8	13.2	10.5	13.4	11.5	12.6	12.7	12.2	13.2	12.1	12.7
78	22.9333	12.7333	20.65	12.56	22.3	20.4	21.2	25	22.4	19.7	19.9	18.5	17	20.1	13.3	12.5	12.9	12.9	14	12.8	12.6	11.5	10.9	12.2
79	19.8	11.6667	21.78	13	21	21.3	22.9	20.5	22.3	21.5	20.9	23	22.4	22	12.5	12.9	13.3	12	13.7	12.3	12.9	13.9	13.4	13.1
80	19.8	10.6667	19.43	12.96	20.3	21.1	18.7	18.3	20.9	19.2	18.9	17.4	21.2	18.3	12.4	13.4	14	12.7	12.3	13	13.2	12.2	13.1	13.3
81	20.3	12.38	20.51	12.36	20.8	21.4	20.1	21.5	18	21	21.1	20.2	20.1	20.9	12.6	12.8	12.1	12.7	11.4	12.9	12.5	12.2	11.8	12.6
82	21.9	13.28	21.79	13.4	22.3	21.8	19.6	22.2	25.3	25.6	20.6	19.2	18.9	22.4	13.9	13.4	12.2	14	15.1	15	11.3	12	11.9	15.2
83	22.6	14	21.36	13.09	18.8	22.9	19.8	22	22.2	18.7	23.2	23.5	21.8	20.7	11.3	14.6	13.1	12.8	13.6	11.7	13.3	14.3	13.3	12.9
84	20.6	12.2464	21.14	12.33	22.1	22.4	22.6	21.8	21.6	21.9	17.6	18.5	22.5	20.4	14.1	12.9	12.2	12.5	12.4	13.6	11.5	10.9	10.3	12.9
85	19.4667	10.4667	21.56	12.5	21.1	23.2	21.1	20.8	23.7	23.6	19.8	19.2	21.9	21.2	12.8	12.8	13.7	11.8	13.3	12.8	11.9	10.9	12.8	12.2
86	20.3667	12.62	20.45	12.83	23	21.4	21.7	20.7	17.8	22.1	19.7	21.3	17.2	19.6	13.4	13.5	13.4	14	12.6	13.9	12.2	12.5	10.6	12.2
87	19.2	11.6667	18.82	11.61	21.4	18.2	20.6	20	21.5	16.4	18.1	19.1	19.1	13.8	13.1	11.6	12.3	11.2	12.7	10.5	11	11.6	12.7	9.4
88	23.1	12.75	22.44	12.84	23.3	22.1	24.1	24.3	20.1	24	22.2	22.6	20.1	21.6	12.5	13.7	13.6	12.6	11.8	13.7	13.8	12.9	11.5	12.3
89	21.4667	13.6	20.38	12.13	20.8	18.1	20.4	20.1	23.5	20.2	19.5	19.1	21.7	20.4	12.9	11.5	12.4	12.3	11.4	12.5	11.7	12.1	12.4	12.1
90	19.87	12.8	19.92	12.7	18.7	21.5	19	20	19.5	21.7	21.3	18.6	20	18.9	11.6	12.7	13.3	12.5	12.2	13.6	13.7	11.8	12.3	13.3
91	22.8667	14.2667	22.48	13.12	22.5	23	21.6	19.9	23.3	23.8	23.2	21.3	23.2	23	12.9	15.3	14	11.9	13	14.2	12.2	11.3	13.2	13.2
92	20.7333	12.2667	22.38	13.3	22.4	23.2	22	24.3	21	20.6	22.7	22.8	21.6	23.2	13.4	14.1	12.6	13	12.2	14	13.8	13.3	12.9	13.7
93	19.7	12.4333	20.13	12.44	20.2	22.1	20.5	21.6	18.5	20.4	17.9	19.4	18.8	21.9	12.4	14	13	12.6	11.3	12.8	11	12.1	12.2	13
94	19.4	11.55	19.06	11.41	17.4	22.3	17.9	21.2	19.6	19.6	16.9	16.1	21.4	18.2	11.2	12.1	11.1	11.2	11.7	11.9	10.5	10.6	12.5	11.3
95	22.7	12.78	23.23	14.02	24	21.8	20.7	26.3	22.9	25.3	24.4	24.1	18.2	24.6	14.6	13.8	13.4	14.1	13.4	15.5	14.5	14.7	12.4	13.8
96	22.8	13.6	21.47	12.75	21.7	23	21.4	19.8	21.9	21.3	22.5	20.2	19.8	23.1	13.3	13.2	13.9	11.1	14.8	12.3	13.5	11.1	11.6	12.7
97	23.1333	13.2667	21.7	12.72	22.5	21	23.5	21.2	24.3	20.3	21.3	20.6	20.6	21.7	13	11.9	13	12.4	14.4	12.5	12.9	11.8	12.6	12.7
98	22.45	13.6778	22.49	13.75	25.9	21.7	22.6	24.2	20.7	20.2	21.7	22.9	22.8	22.2	14	12.8	12.7	13.9	13.1	13.4	15.6	14	14.4	13.6
99	21.0667	11.3267	19.51	11.94	19.6	19.6	22.3	19.1	19.5	18.7	19.3	19.1	18.4	19.5	11.6	12.5	12.7	12.1	12.3	11.8	12.7	11.2	10.6	11.9
100	19.7333	11.7333	19.65	11.65	19.6	19.6	22.3	19.1	19.5	18.7	19.3	19.1	19.2	20.1	11.6	11.4	11.7	11.8	12.2	10.1	12.9	11.5	11.3	12
101	19.1333	11.4667	21.57	13.48	18.4	21.3	21.9	22.1	21.9	22.2	20.8	24	22	21.1	12.9	12.7	13.1	13.3	13.1	14.3	14.9	13.5	13.6	13.4
102	21.8	13.1333	21.18	13.22	22.7	20	22.1	20.3	22.7	22.5	19.5	20.1	22.1	19.8	14.4	12.5	16.7	12.6	12.4	14	12.2	11.7	13.2	12.5
103	19.4667	12.2	18.97	11.74	21.6	22	18.1	20.1	20.6	20.3	17.4	17.8	15.4	16.4	13	13	10.9	12.8	13.3	12.6	10.5	11.3	9.6	10.4
104	20.0667	10.9333	21.01	11.81	20.2	22	20.5	20.3	22.6	19.5	22.2	21.6	20.2	21	10.9	11.6	12.1	11.3	12.2	10.1	12.7	12.9	12.5	11.8
105	-100	-100	-100	-100	-100	-100	-100	-100	-100	-100	-100	-100	-100	-100	-100	-100	-100	-100	-100	-100	-100	-100	-100	-100
106	21.6	12.2	20.03	11.44	20.2	21.6	20.2	19.6	20.8	19.4	20.6	18.9	19	20	11.5	12.2	11.7	11.1	11.5	11.5	11.9	10.8	10.8	11.4
107	19.4	12.376	19.69	12.19	25.3	19.5	19.8	17.4	19.5	16.4	19	20.3	20.6	19.1	13.9	12.5	11.9	11.5	12.6	10.7	12.4	12.5	12	11.9
108	19.78	11.7333	19.84	11.74	20.7	22	19.9	19	18.8	21	17.3	19.4	19.9	20.4	11.1	12.7	12.4	11.8	11.3	12.1	12.2	11.2	10.6	12
109	18.6	11.7333	19.98	12.11	18.1	21.5	18.4	19.8	21.5	19.8	20.2	19.3	20.8	20.4	11.9	11.9	10.8	11.6	13.6	12.2	11.3	11.4	14	12.4
110	19.7333	11.2667	18.92	11.95	20.5	20	20.3	18.5	18.9	20.2	16.5	17.9	17.5	18.9	13.3	13.5	11.6	12.7	12.1	12.1	10.6	10.6	11.1	11.9
111	22.3	13.41	22.07	13.39	22.7	24.2	23	21.4	21.6	20.2	19.9	23.6	21.1	23	13.1	13.8	14.9	12	12.5	12.9	12.6	15.3	13.2	13.6
112	24.6	15.8	22.52	13.81	25.5	25	19.9	22.5	19.8	23	23.6	21.4	21.9	22.6	14.4	14.7	12.8	13.5	13	14.4	13.9	13.6	14	13.8
113	18.3333	11.2	20.4	12.77	21.3	19.3	18.7	21.4	19.5	19.6	22	21.8	21.1	19.3	13.2	11.5	11.6	13.3	12.5	12.9	13.4	13.5	13.4	12.4
114	19.0667	12.2	19.7	11.95	18.2	19.9	18.8	19.7	19.4	21	20.4	19.5	18.6	21.5	11.2	12	11.3	12	11.4	12.6	11.5	12.2	11.6	13.7
115	20.8	12.0667	19.04	11.75	21.2	18.4	19.2	21.6	17.4	19.5	17.7	18.5	19.7	17.2	12.1	10	10.6	12.6	10.5	16.7	11.1	11.5	11.1	11.3
116	21.8667	12.7333	19.26	11.7	18.6	20	18.4	21.2	20.5	20.2	18.2	19.3	18.5	17.7	11.3	11.5	11.4	12	13.1	12.2	11	11.7	11.5	11.3
117	24.1333	14.2	19.99	12.1	19.5	23.2	19.4	19.8	19.6	19.6	17.6	19.2	22	20	11.5	13.3	11.7	11.8	11.8	12.5	10.8	11.5	14	12.1
118	24.6	14.5333	22.69	13.31	23.9	24.5	21.3	22.5	22.7	21.8	22.7	22.1	23.3	22.1	14.8	14.5	11.8	12.4	12.8	13.3	14.1	12.8	13.5	13.1
119	21.4	13.8667	19.04	12.87	20	19	19.1	19.9	20.3	18.2	19.4	17.6	17.9	19	13.7	12.5	13.3	12.5	13.5	12.8	13.4	12.2	11.9	12.9
120	20.5333	11.8	19.67	11.65	22.5	21.1	20.4	21.4	19	19.7	17.3	17	19.7	18.6	13.6	11.4	12.4	12.6	12	11.6	10.3	10	11.1	11.5
121	19.3333	12.6667	19.72	12.74	21.2	21.4	18.4	18.2	17.1	20.5	20.4	22.9	16.3	20.8	13.7	13.1	12.3	11.9	11.5	12.6	12.4	14	12.7	13.2
122	22.4667	13.3333	21.09	12.72	22.2	20.4	19.2	19.9	22.6	23	20.3	21	22.3	20	12.2	12.4	11.1	12.5	13.4	14.4	14.3	12.3	12.5	12.1
123	20.47	12.3333	20.82	12.31	24.8	16.6	23.3	20.5	16.9	18.5	19.8	23.4	21.8	22.6	14	11.5	12.9	11.4	9.4	13.2	11.5	13.7	12.5	13
124	18.4444	10.6667	21.93	12.58	19.4	25.4	19.1	24.3	22.5	21.9	20.8	22	21.7	22.2	11.7	13.7	11	14.5	13	12.5	12.5	12.1	12.2	12.6
125	20.4	12.2	19.37	11.14	17.5	20.4	17.9	20	19.9	17.5	22.3	19.5	19	19.7	10.4	10.9	10.9	10.9	11.4	10.9	11.6	12	10.7	11.7
126	20.9333	12.6	19.73	12.75	22.6	21.6	17.7	20.1	22	17.1	18.1	19.7	18.5	19.9	14.2	12.5	11.4	12.3	13.7	11.2	11.8	12.7	14	13.7
127	18.5333	12.8667	19.12	11.85	20.4	20.1	20.4	17.9	19.3	18.3	17.3	19.7	18.8	19	13.3	12.9	12	11.1	11.9	11.7	10.3	11.8	11.7	11.8
128	20.6	12.7333	19.94	13.12	19.9	18.9	23.7	20.9	19	20.1	16.2	17.5	21.9	21.3	13.9	13.5	16.8	12.4	13.9	12	11.2	11.2	13	13.3
129	23.6667	13.4667	22.81	12.64	20.8	24	21.2	21.8	22.3	24.4	23.6	23.9	24.3	21.8	12.1	11.8	12.2	17.3	13.4	12.7	11.4	12.3	10.9	12.3
130	22.9333	12.7333	22.9	13.35	22.6	26.4	23.9	21.9	20.9	23.4	20.6	20.5	25.6	23.2	13.5	14.6	13.2	13	12.8	12.9	13.4	14.1	13.5	12.5
131	19.8667	10.6667	21.81	12.52	21.6	23.6	22.7	22.8	21.6	19.1	23.9	19.8	21.2	21.8	12.1	13.8	12.4	13.1	11.3	10.9	14.6	12	12.5	12.5
132	20.9333	12.8667	20.27	12.34	21.3	23	18.4	20.2	17.8	22.1	20.2	19.8	17.9	22	12.5	11.8	13.7	10.7	12.9	11.3	13.5	12.3	11.8	12.9
133	21.6	13.8	21.66	12.9	21.3	23.4	19	20.9	20.9	17.9	21.5	21.6	28.4	21.7	12.5	13.9	12.5	12.5	13.4	12.3	13.2	13.1	12.7	12.9
134	23.6	13.4667	21.98	13.1	20.3	23.3	22	20.4	23.9	21.4	22.5	23.3	21	21.7	12.5	13.7	12.4	12.8	14.1	13.2	13.7	13.4	12.3	12.9
135	19.67	12.49	20.11	12.53	21.3	21	20.1	19.5	20.2	20.3	19.3	19.4	20.9	19.1	12.9	12.3	13.5	12.2	12.4	12.6	11.8	12.5	12.8	12.3
136	24.18	13.15	24.39	13.52	25.4	25.6	25.1	21.9	23.1	25.5	23.3	24.8	23.9	25.3	14.3	14.6	14.4	13.5	12.8	12.7	13.3	13.2	12.8	13.6
137	22.88	13.0167	22.3	13.02	22.5	22.8	23.1	22.9	19.3	22.6	22.7	21.7	23.4	22	13.8	12.5	13	13.1	13.7	11	14	12.6	13.5	13
138	22.279	13.6667	22.48	13.78	23.1	22.7	21.4	20.6	23.8	23	21.7	23.5	23.1	21.9	14.6	14.6	12.6	13.8	14.1	13.4	13.3	13.9	13.9	13.6
139	21.7333	12.4667	21.9	12.11	21.8	19.9	20.8	22.8	21.7	23.6	19.8	23.3	22.4	22.9	12.8	10.7	12.4	12.1	12.6	13.5	10.6	12.3	12	12.1
140	23.7333	13.6	22.39	12.91	24.7	19.3	23.5	22	22.8	24.8	21.3	23.2	21.5	20.8	14	11.2	15.3	14.1	12.1	14.2	11.5	12	12.6	12.1
141	20	11.6667	20.39	11.87	23	19.3	20.7	18.8	19.4	21.2	19.6	21.5	22.2	18.2	13.4	11.2	12	10.8	11.8	12.8	11.1	12	12.2	11.4
142	21.9	14.38	22.6	14.71	22	24.4	20.1	24.3	22.3	24.3	22.7	20.5	21.8	23.6	15.2	15.7	13	15.9	15	15	14.1	14.1	13.4	15.7
143	23.9	13.6667	22.56	13.7	25.6	23	21.4	20.6	20.5	24.4	22.9	23.4	22	21.8	14	13.6	14	12.2	13.3	14.3	14.4	14	13.5	13.7
144	24.6667	10.7333	24.29	13.48	24.2	24.1	24.7	25.7	22.4	26.1	22.7	25	23.3	24.7	13	12.6	12.9	14.3	12.8	14.3	13.2	14.8	13.3	13.6
145	21.8	12.3333	20.48	11.62	19.6	20.5	20.1	19.1	21.3	21.2	20.5	21	20.8	20.7	11.2	11.6	12.4	11	12	11.9	11.5	11.5	11.3	11.8
146	23.1333	14.6	22.76	14.46	23.7	23.3	24.1	21.3	20.6	23	23.5	21.4	23.9	22.8	14.5	14.4	14.3	13.9	15.1	14.7	15	13.6	14.6	14.5
147	20.4	12.7333	22.01	12.71	23.1	21	23	19.8	20.3	22.7	22.4	22.6	21.9	23.3	13.1	12.8	12.6	10.6	12.5	12.5	13.6	14.8	11.9	12.7
148	20.4	12.6	20.83	12.96	20.3	21.4	20.7	18.7	21.6	20.6	21.1	21.8	21.9	20.2	11.8	12.8	12.5	12.4	12.7	13.6	12.9	13.2	14.1	13.6
149	20.6	11.9333	22.08	12.86	22.6	21.2	21.7	20.3	22.5	24.5	21.8	19.1	24.3	22.8	12.3	13	13.6	14.3	13.7	13.4	11.7	10.7	13.5	12.4
150	19.2	12.3333	18.16	11.35	18.3	18.7	21	17.3	17.7	19.7	17.5	16.4	16.2	18.8	11.1	11.3	12.6	12.2	11.2	12.1	10.9	10.1	10.2	11.8
Note: Missing phenotypes were coded as -100.

## Sheet: Genotype
Table S3. Phenotype and genotype of 150 F2 individuals for QTL with CAPS markers
No.	M1047465	M1468248	M1929605	M2110463	M2374213	M2802290	M2984727	M3507675	M3950547	M4491087	M4930644
1	2	2	2	2	2	2	2	2	2	2	1
2	1	1	1	1	1	1	1	1	1	1	1
3	1	1	1	1	1	1	1	1	1	1	1
4	1	1	1	1	1	1	1	1	-1	0	0
5	0	0	0	0	0	0	0	0	0	0	0
6	2	1	1	1	1	1	1	1	1	1	1
7	1	0	0	0	0	0	0	0	0	0	0
8	2	2	2	2	2	2	2	2	2	1	1
9	0	0	0	0	0	0	0	1	1	1	1
10	0	0	0	0	0	0	0	2	2	2	2
11	1	0	-1	1	1	1	1	1	1	1	1
12	0	1	1	1	1	1	1	1	1	1	1
13	0	0	0	0	0	0	1	1	1	1	1
14	0	0	1	1	1	1	1	1	1	1	1
15	2	1	1	1	1	1	1	1	1	1	1
16	0	0	0	0	0	1	1	2	2	2	2
17	0	0	0	0	0	0	0	0	0	0	0
18	1	1	1	1	1	1	1	1	1	1	1
19	1	1	1	1	1	2	2	2	1	1	1
20	1	1	1	1	1	1	1	2	2	2	2
21	0	0	1	1	1	1	1	1	1	0	0
22	1	1	1	1	1	1	1	1	0	0	0
23	1	1	1	1	1	1	1	1	1	2	2
24	2	2	1	1	1	1	1	1	1	1	1
25	0	0	0	0	0	0	0	1	1	1	1
26	1	1	1	1	1	1	1	1	1	1	1
27	0	0	0	0	0	0	0	0	1	1	1
28	0	0	0	0	0	0	0	1	1	1	1
29	2	2	2	2	2	1	1	1	1	1	1
30	0	0	0	0	0	0	0	1	1	1	1
31	1	1	1	1	1	1	1	1	1	2	2
32	0	0	0	0	0	0	0	0	0	0	0
33	0	0	0	0	0	0	0	0	0	0	0
34	1	1	1	1	1	1	1	1	1	1	1
35	0	0	0	0	1	1	1	1	1	1	1
36	1	1	1	1	1	1	1	1	1	1	1
37	1	1	1	1	1	1	1	1	1	1	1
38	2	2	2	2	1	1	1	1	1	1	1
39	1	1	1	1	1	1	1	2	2	2	2
40	0	0	0	0	0	0	0	1	1	1	1
41	0	0	0	0	0	0	0	0	0	1	1
42	1	1	2	2	2	2	2	2	2	2	2
43	2	2	2	2	2	2	2	2	2	2	2
44	1	1	1	1	1	1	1	1	1	1	1
45	1	1	1	1	1	1	1	1	1	1	2
46	2	2	2	2	2	2	2	2	2	2	2
47	1	2	2	2	2	2	2	2	2	2	2
48	1	1	1	1	1	1	1	0	0	0	0
49	2	2	2	2	1	1	1	1	1	1	1
50	1	1	1	1	1	1	1	1	1	1	1
51	0	0	0	0	0	0	0	1	1	1	1
52	1	1	1	1	1	1	1	1	1	1	1
53	1	1	1	1	1	1	1	0	0	0	0
54	1	1	0	0	0	0	0	0	1	1	1
55	2	1	1	1	1	1	1	1	1	1	2
56	1	1	1	1	1	1	1	1	1	1	1
57	1	1	1	1	1	1	1	1	1	1	1
58	1	1	1	1	1	1	1	1	1	1	1
59	1	1	1	1	1	1	1	1	1	1	1
60	1	0	0	0	0	0	0	0	0	0	0
61	1	1	1	0	0	0	0	0	0	0	0
62	1	1	1	1	1	1	1	1	1	1	1
63	0	0	0	0	1	1	1	1	1	1	1
64	2	2	2	2	2	1	1	1	1	1	1
65	1	1	2	2	2	2	2	2	2	1	1
66	1	1	1	1	1	1	1	2	2	2	2
67	1	1	1	2	2	1	1	1	1	1	1
68	1	1	1	1	1	1	1	1	1	1	1
69	1	1	2	2	2	2	2	2	2	2	2
70	2	2	2	2	2	2	2	2	2	2	2
71	-1	-1	2	2	2	2	2	2	2	2	2
72	0	0	0	0	0	0	0	0	0	0	0
73	0	0	0	0	0	0	0	0	0	0	1
74	1	1	1	1	1	1	1	1	1	1	1
75	1	1	1	1	1	1	1	1	1	1	1
76	1	1	1	0	0	0	0	0	1	1	1
77	2	2	2	2	2	2	2	2	2	2	2
78	1	0	0	0	0	0	0	0	0	0	0
79	1	1	2	2	2	2	2	1	1	1	1
80	2	2	1	1	1	0	1	0	0	0	0
81	0	0	0	0	0	0	0	0	1	1	1
82	0	2	2	2	2	2	2	2	2	2	2
83	1	1	1	1	1	2	2	2	2	2	2
84	2	2	2	2	2	2	2	2	1	1	1
85	1	0	0	0	0	0	0	0	0	0	0
86	1	1	1	1	1	1	1	1	1	1	2
87	2	1	1	1	1	1	1	1	1	1	1
88	2	2	2	2	2	2	2	2	2	1	1
89	1	1	1	1	1	1	1	1	1	1	1
90	0	0	0	0	0	0	0	0	0	0	0
91	2	2	2	2	2	2	2	1	1	1	1
92	0	1	1	1	1	2	2	2	2	2	2
93	1	1	1	1	0	0	0	0	0	0	0
94	1	0	0	0	0	0	0	0	1	1	1
95	1	1	1	1	1	1	2	2	2	2	2
96	0	1	1	1	1	1	1	1	1	1	1
97	2	1	1	1	1	1	1	1	1	1	1
98	2	2	2	2	2	1	1	1	1	1	1
99	1	1	0	0	0	0	0	0	0	0	0
100	0	0	0	0	0	0	0	0	0	0	0
101	2	2	1	1	0	0	0	0	0	0	0
102	2	1	1	1	1	1	1	1	1	1	1
103	2	2	2	2	2	2	2	2	2	2	2
104	1	1	0	0	0	0	0	1	1	1	1
105	1	1	1	1	1	1	1	2	2	2	2
106	0	0	0	0	0	0	0	2	2	2	2
107	0	0	0	0	0	0	0	0	0	0	0
108	1	1	0	0	0	1	1	1	1	1	1
109	0	0	0	0	0	0	0	0	1	1	1
110	0	0	0	0	0	0	0	0	0	0	0
111	1	2	2	2	2	1	1	1	0	0	0
112	2	2	2	2	2	2	2	1	1	1	1
113	1	1	1	1	1	1	1	1	1	1	1
114	0	0	1	1	1	1	1	1	1	1	1
115	1	1	1	1	1	1	1	1	1	1	1
116	1	2	2	2	2	2	2	2	2	2	2
117	2	2	2	2	1	1	1	1	0	0	0
118	2	1	1	1	1	1	1	2	2	2	2
119	1	1	1	1	1	1	1	2	2	2	2
120	1	0	0	0	0	0	0	0	0	0	0
121	1	1	1	1	1	1	1	1	1	1	1
122	1	1	2	2	1	1	1	1	1	1	1
123	1	1	1	1	1	1	1	1	1	1	1
124	2	2	1	0	0	0	0	1	1	1	1
125	2	2	2	2	2	2	2	1	1	2	2
126	2	2	2	2	2	2	2	2	2	1	1
127	2	1	1	1	1	1	1	1	1	0	0
128	1	1	1	1	1	1	1	1	1	1	1
129	1	2	2	2	2	2	2	2	2	2	2
130	1	1	1	1	1	2	2	2	2	1	1
131	1	1	1	1	1	1	1	1	2	2	2
132	0	0	0	0	0	1	1	1	1	1	1
133	2	1	1	1	1	1	1	1	1	1	1
134	1	1	1	1	1	2	2	1	1	1	1
135	0	0	0	0	0	0	1	1	1	1	1
136	2	2	2	2	2	2	2	2	2	2	2
137	0	0	0	0	0	1	1	2	2	2	2
138	2	1	1	1	1	1	1	1	1	1	1
139	0	0	0	0	0	0	0	0	0	0	0
140	2	2	2	2	1	1	1	1	2	2	2
141	1	1	0	0	0	0	0	0	0	0	0
142	2	2	2	2	1	1	1	1	1	1	1
143	2	2	2	2	2	2	2	2	2	2	2
144	1	1	1	1	1	2	2	1	1	1	1
145	2	2	2	2	2	1	1	1	1	1	1
146	1	1	1	1	1	1	1	1	1	1	1
147	2	2	2	2	2	2	2	2	0	0	0
148	1	1	1	1	1	1	1	1	1	0	0
149	2	2	1	1	1	1	1	1	1	1	1
150	0	0	0	0	0	0	0	0	0	0	0
Note：The two parent bands of “2013-12” and “9-6” were coded as 0 and 2 respectively, and both prensent bands were coded as 1. Missing values of marker type were coded as -1.
