# Supplementary material for: Construction of a High-Density Genetic Map and Analysis of Seed-Related Traits Using Specific Length Amplified Fragment Sequencing for Cucurbita maxima
Source: Front Plant Sci. 2020 Feb 21;10:1782. doi: 10.3389/fpls.2019.01782 (PMC7046561; doi:10.3389/fpls.2019.01782)
Supplement: Supplementary file 13 [file Table_6.xls]

Table S6. The genotype of 8,406 markers in F2 individual
MarkerID	Map position	Chromosome	Chr position	Ref	Alt	R01	Depth	AlleDp	R02	Depth	AlleDp	F2-1	Depth	AlleDp	F2-2	Depth	AlleDp	F2-3	Depth	AlleDp	F2-4	Depth	AlleDp	F2-5	Depth	AlleDp	F2-6	Depth	AlleDp	F2-7	Depth	AlleDp	F2-8	Depth	AlleDp	F2-9	Depth	AlleDp	F2-10	Depth	AlleDp	F2-11	Depth	AlleDp	F2-12	Depth	AlleDp	F2-13	Depth
Marker939	0	Cma_Chr01	702622	A	G	A	10	10,0	G	22	0,22	R	10	2,8	A	8	8,0	G	7	0,7	R	11	6,5	A	6	6,0	G	11	0,11	R	17	7,10	A	10	10,0	R	10	1,9	A	11	11,0	G	4	0,4	R	5	3,2	A	2
Marker285	0.5	Cma_Chr01	354114	T	C	C	20	1,19	T	16	16,0	Y	7	5,2	C	11	0,11	T	36	36,0	Y	10	7,3	C	45	0,45	T	15	15,0	Y	9	1,8	C	7	0,7	Y	12	6,6	C	29	0,29	Y	37	17,20	Y	19	7,12	C	15
Marker941	0.5	Cma_Chr01	702918	T	C	T	19	19,0	C	18	0,18	Y	10	2,8	T	8	8,0	C	7	0,7	Y	11	6,5	T	6	6,0	C	11	0,11	Y	16	6,10	T	10	10,0	Y	10	1,9	T	11	11,0	C	4	0,4	Y	5	3,2	T	2
Marker254	1	Cma_Chr01	343229	T	C	C	18	1,17	T	12	12,0	Y	13	9,4	C	11	0,11	T	49	49,0	Y	19	12,7	C	49	0,49	T	33	32,1	Y	29	16,13	C	5	0,5	Y	41	20,21	C	21	0,21	Y	47	20,27	Y	22	12,10	C	25
Marker376	1	Cma_Chr01	376644	T	C	T	16	15,1	C	15	0,15	Y	26	16,10	T	12	12,0	C	30	0,30	Y	20	12,8	T	12	12,0	C	18	0,18	Y	13	6,7	T	16	16,0	Y	13	9,4	T	14	14,0	Y	27	9,18	Y	16	4,12	T	15
Marker22	1	Cma_Chr01	293026	G	A	G	11	11,0	A	14	0,14	R	26	15,11	G	21	21,0	A	20	0,20	R	21	4,17	G	30	30,0	A	29	0,29	R	37	22,15	G	46	46,0	R	29	8,21	G	22	22,0	R	19	9,10	R	21	10,11	G	16
Marker1093	1.5	Cma_Chr01	819445	C	T	C	16	15,1	T	17	0,17	Y	8	3,5	C	5	5,0	T	37	0,37	Y	6	2,4	C	52	51,1	T	28	0,28	Y	26	19,7	Y	7	5,2	Y	26	14,12	C	21	21,0	Y	74	52,22	Y	78	60,18	C	27
Marker676	1.5	Cma_Chr01	653297	T	C	T	29	28,1	C	22	0,22	Y	10	8,2	T	17	17,0	C	24	0,24	Y	11	10,1	T	24	24,0	C	10	0,10	Y	25	15,10	T	21	20,1	T	35	35,0	T	19	19,0	Y	13	10,3	Y	27	7,20	T	17
Marker547	1.5	Cma_Chr01	618210	A	C	C	25	0,25	A	17	17,0	M	14	3,11	C	22	0,22	A	39	39,0	M	19	7,12	C	17	0,17	A	26	26,0	M	30	10,20	C	61	0,61	C	25	0,25	C	18	0,18	M	10	3,7	M	14	8,6	C	31
Marker379	1.5	Cma_Chr01	377337	T	A	T	20	19,1	A	14	0,14	W	11	5,6	T	16	16,0	A	22	0,22	W	16	4,12	T	44	44,0	A	26	1,25	W	21	12,9	T	43	42,1	W	14	3,11	T	10	10,0	W	11	7,4	W	14	7,7	T	2
Marker846	1.5	Cma_Chr01	675033	G	A	G	19	17,2	A	13	0,13	G	4	4,0	G	8	8,0	A	3	0,3	G	6	6,0	G	4	4,0	A	6	0,6	R	11	9,2	G	15	15,0	R	35	23,12	G	7	7,0	R	8	6,2	R	15	9,6	G	6
Marker521	1.5	Cma_Chr01	612746	T	G	T	11	11,0	G	17	0,17	K	16	7,9	T	13	13,0	G	26	0,26	K	20	5,15	T	23	23,0	G	22	0,22	K	32	17,15	T	19	19,0	T	28	28,0	T	44	44,0	K	37	20,17	K	42	24,18	T	14
Marker519	1.5	Cma_Chr01	612566	G	T	G	19	18,1	T	12	0,12	K	16	7,9	G	13	13,0	T	26	0,26	K	20	5,15	G	23	23,0	T	22	0,22	K	32	17,15	G	19	19,0	G	29	29,0	G	45	45,0	K	34	17,17	K	42	24,18	G	14
Marker573	1.5	Cma_Chr01	623634	T	C	C	14	0,14	T	22	22,0	C	1	0,1	C	1	0,1	T	19	19,0	Y	6	3,3	C	19	1,18	T	24	24,0	Y	19	14,5	C	17	0,17	C	15	0,15	Y	14	2,12	Y	4	2,2	Y	30	8,22	C	16
Marker572	1.5	Cma_Chr01	623622	T	A	A	15	0,15	T	20	20,0	A	1	0,1	A	1	0,1	T	19	19,0	W	6	3,3	A	19	0,19	T	24	24,0	W	19	14,5	A	17	0,17	A	15	0,15	W	14	2,12	W	4	2,2	W	30	8,22	A	16
Marker548	1.5	Cma_Chr01	618430	G	C	C	21	0,21	G	20	20,0	S	14	3,11	C	22	0,22	G	39	39,0	S	19	7,12	C	17	0,17	G	26	26,0	S	30	10,20	C	62	0,62	C	24	0,24	C	18	0,18	S	10	3,7	S	14	8,6	C	31
Marker771	1.5	Cma_Chr01	663168	T	C	T	15	14,1	C	16	0,16	Y	7	5,2	T	13	13,0	C	25	0,25	Y	12	3,9	T	23	23,0	C	20	0,20	Y	27	16,11	T	15	15,0	T	45	45,0	T	8	8,0	Y	12	4,8	Y	15	9,6	T	14
Marker774	1.5	Cma_Chr01	663699	C	T	C	11	10,1	T	18	0,18	Y	9	6,3	C	16	16,0	T	56	0,56	Y	24	14,10	C	32	32,0	T	22	0,22	Y	36	22,14	C	28	28,0	C	51	51,0	C	29	29,0	Y	51	25,26	Y	48	25,23	C	40
Marker1029	1.5	Cma_Chr01	752417	C	T	C	14	14,0	T	22	0,22	Y	12	6,6	C	11	11,0	T	41	0,41	Y	17	10,7	C	45	45,0	T	20	0,20	Y	33	21,12	C	70	70,0	Y	50	18,32	C	27	27,0	Y	48	20,28	Y	77	28,49	C	27
Marker221	1.5	Cma_Chr01	332114	A	G	G	15	0,15	A	27	27,0	R	28	18,10	G	15	0,15	A	82	82,0	R	27	15,12	G	70	0,70	A	59	59,0	R	39	26,13	G	22	1,21	R	53	29,24	G	44	0,44	R	100	51,49	R	55	33,22	G	34
Marker84	1.5	Cma_Chr01	310990	T	A	A	12	0,12	T	15	15,0	W	7	2,5	A	7	0,7	T	11	11,0	W	10	3,7	A	35	0,35	T	24	24,0	W	26	16,10	A	21	0,21	W	15	9,6	A	17	0,17	W	16	7,9	W	17	9,8	A	7
Marker1039	2.5	Cma_Chr01	753861	T	C	T	13	13,0	C	13	0,13	Y	12	5,7	Y	15	13,2	C	20	0,20	Y	10	5,5	T	5	5,0	C	13	0,13	Y	14	6,8	T	33	33,0	Y	35	14,21	T	15	15,0	Y	12	8,4	Y	27	18,9	Y	21
Marker1317	3	Cma_Chr01	868774	A	G	G	11	0,11	A	13	13,0	R	21	7,14	G	21	0,20	A	34	34,0	R	13	6,7	G	14	0,14	A	19	19,0	R	17	13,4	G	28	0,28	R	21	7,14	G	17	0,17	R	21	9,12	R	42	11,31	G	12
Marker1006	3	Cma_Chr01	746894	C	G	C	15	14,1	G	13	0,13	S	10	2,8	C	3	3,0	G	18	0,18	S	10	4,6	C	14	14,0	G	13	0,13	S	6	4,2	C	25	25,0	S	28	17,11	C	10	10,0	S	13	3,10	S	12	11,1	C	3
Marker1914	4	Cma_Chr01	1028726	T	A	T	19	19,0	A	14	0,14	W	13	7,6	T	4	4,0	A	13	0,13	A	3	0,3	T	1	1,0	A	11	0,11	W	9	2,7	T	34	34,0	W	10	3,7	T	3	3,0	W	3	1,2	W	11	10,1	T	7
Marker1564	4.501	Cma_Chr01	950399	G	A	G	16	15,1	A	17	0,17	R	24	17,7	G	16	16,0	A	42	2,40	R	27	9,18	G	18	18,0	A	11	0,11	R	34	20,14	G	23	23,0	R	13	8,5	G	14	14,0	R	39	21,18	R	49	26,23	G	10
Marker1225	4.501	Cma_Chr01	842966	G	A	G	17	16,1	A	12	0,12	R	20	8,12	G	16	16,0	A	15	0,15	R	26	10,16	G	27	27,0	A	9	0,9	R	20	16,4	G	52	52,0	R	29	16,13	G	23	23,0	R	26	13,13	R	10	4,6	G	9
Marker1169	4.501	Cma_Chr01	830016	T	C	T	17	16,1	C	18	0,18	Y	13	4,7	Y	14	11,3	C	49	0,49	Y	24	12,12	T	26	26,0	C	35	0,35	Y	53	29,24	T	28	28,0	Y	39	23,16	T	22	22,0	Y	54	29,25	Y	65	46,19	T	19
Marker1714	4.501	Cma_Chr01	981425	T	G	T	21	19,2	G	15	0,15	K	35	11,24	K	12	10,2	G	98	1,97	K	37	21,16	T	66	66,0	G	32	0,32	K	58	32,26	T	24	24,0	K	64	32,31	T	50	50,0	K	79	43,36	K	120	83,37	T	24
Marker2129	4.501	Cma_Chr01	1068001	T	A	T	15	14,1	A	19	0,19	W	9	3,6	T	5	5,0	A	3	0,3	W	10	5,5	T	2	2,0	A	4	0,4	W	6	2,4	T	24	24,0	W	7	4,3	T	12	12,0	N	.	.	W	4	3,1	T	2
Marker1876	5.001	Cma_Chr01	1024759	A	C	A	13	13,0	C	16	1,15	A	3	3,0	A	5	5,0	C	9	0,9	M	8	4,4	M	8	7,1	C	3	0,3	M	15	7,8	A	12	12,0	A	1	1,0	A	4	4,0	M	12	3,9	M	12	1,11	A	5
Marker1697	5.001	Cma_Chr01	978342	T	G	T	17	16,1	G	18	0,18	K	24	13,11	T	9	9,0	G	58	1,57	K	14	7,7	T	63	63,0	G	17	1,16	K	58	34,24	T	25	25,0	K	66	35,31	T	46	45,0	K	72	45,27	K	65	44,21	T	47
Marker2064	5.001	Cma_Chr01	1063269	T	G	T	20	19,1	G	16	0,16	K	35	13,22	T	15	15,0	G	54	0,54	K	29	17,12	T	47	46,1	G	44	1,43	K	41	21,20	T	24	24,0	K	43	26,17	T	43	43,0	K	53	27,26	K	50	24,26	T	41
Marker1705	5.506	Cma_Chr01	980125	T	G	T	11	11,0	G	16	0,16	K	28	10,17	T	17	17,0	G	45	2,43	K	23	18,5	T	58	58,0	G	12	0,12	K	49	20,29	T	12	12,0	K	38	22,16	T	38	38,0	K	59	46,13	K	77	49,28	T	33
Marker2157	5.506	Cma_Chr01	1099193	T	C	T	16	16,0	C	20	0,20	Y	26	9,16	T	18	17,0	C	40	0,40	Y	45	22,23	T	49	49,0	C	32	0,32	Y	38	19,19	T	63	63,0	Y	40	14,26	T	24	23,1	Y	56	27,29	Y	37	14,23	T	36
Marker1563	6.006	Cma_Chr01	950390	T	C	T	16	15,1	C	20	0,20	Y	24	17,7	T	16	16,0	C	42	2,40	Y	27	9,18	T	18	18,0	C	11	0,11	Y	34	20,14	T	23	23,0	Y	13	8,5	T	14	14,0	Y	39	21,18	Y	49	26,23	T	12
Marker2395	6.506	Cma_Chr01	1275494	T	C	T	19	19,0	C	22	0,22	Y	6	3,3	T	2	2,0	C	18	0,18	Y	6	3,3	Y	3	1,2	C	5	0,4	Y	16	7,8	T	7	7,0	Y	20	10,10	T	5	5,0	Y	6	4,2	Y	22	8,14	T	10
Marker1409	6.506	Cma_Chr01	896067	T	C	C	12	0,12	T	14	14,0	Y	5	1,4	C	4	0,4	T	38	38,0	C	3	0,3	C	79	0,79	T	43	43,0	Y	29	15,14	C	13	0,13	Y	33	20,13	C	21	0,21	Y	74	42,32	Y	94	45,48	C	29
Marker2389	7.006	Cma_Chr01	1273982	G	A	G	12	12,0	A	20	0,20	R	10	6,4	G	6	6,0	A	17	0,17	R	10	6,4	R	15	7,8	A	10	0,10	R	18	11,6	G	20	20,0	R	7	1,6	G	6	6,0	R	13	8,5	R	7	5,2	R	13
Marker1408	7.006	Cma_Chr01	896050	T	A	A	13	0,13	T	14	14,0	W	5	1,4	A	4	0,4	T	38	38,0	A	3	0,3	A	77	0,77	T	43	43,0	W	28	13,15	A	13	0,13	W	32	19,12	A	20	0,20	W	74	41,33	W	92	46,46	A	29
Marker2575	9.508	Cma_Chr01	1333957	C	G	C	18	17,1	G	15	0,15	S	9	5,4	C	1	1,0	G	19	0,19	N	.	.	S	13	2,11	G	5	0,5	S	9	4,5	S	23	8,15	S	14	10,4	C	2	2,0	S	14	10,4	S	19	9,10	C	3
Marker2626	9.508	Cma_Chr01	1347484	G	T	G	17	16,1	T	21	0,21	K	42	31,11	G	19	19,0	K	51	28,23	K	42	32,10	K	36	17,19	T	32	1,31	K	32	13,19	K	12	7,5	K	44	25,19	G	23	23,0	K	56	28,28	K	47	17,30	K	38
Marker2388	9.508	Cma_Chr01	1273976	A	G	A	14	14,0	G	19	0,19	R	10	6,4	A	6	6,0	G	17	0,17	R	10	6,4	R	15	7,8	G	10	0,10	R	18	11,7	A	20	20,0	R	7	1,6	A	6	6,0	R	13	8,5	R	7	5,2	R	13
Marker2247	9.508	Cma_Chr01	1247423	G	A	G	10	10,0	A	13	1,12	R	20	14,6	G	1	1,0	A	15	1,14	R	25	18,7	R	22	16,6	A	10	0,10	R	29	10,19	G	33	33,0	R	29	14,15	G	5	5,0	R	21	10,11	R	15	8,7	R	13
Marker2262	9.508	Cma_Chr01	1249910	A	G	A	16	15,1	G	19	0,19	R	15	3,12	A	4	4,0	G	25	0,25	R	16	3,13	R	23	10,13	G	13	0,13	R	11	6,5	A	12	12,0	R	23	6,17	A	5	5,0	R	38	15,23	R	9	1,8	A	13
Marker2212	9.508	Cma_Chr01	1240762	C	T	C	16	16,0	T	23	0,23	Y	16	5,11	C	14	14,0	T	10	0,10	Y	14	8,6	Y	17	10,7	T	5	0,5	Y	11	3,8	C	17	17,0	Y	15	5,10	C	15	15,0	Y	11	3,8	Y	11	5,6	C	11
Marker2271	9.508	Cma_Chr01	1251785	A	T	A	15	14,1	T	23	0,23	W	22	15,7	A	15	15,0	T	20	0,20	W	20	8,12	W	29	18,11	T	14	1,13	W	17	8,9	A	22	22,0	W	25	8,17	A	15	15,0	W	23	8,15	W	25	16,9	A	12
Marker2387	9.508	Cma_Chr01	1273949	T	C	T	15	15,0	C	18	0,18	Y	10	6,4	T	6	6,0	C	17	0,17	Y	10	6,4	Y	15	7,8	C	10	0,10	Y	17	11,6	T	18	18,0	Y	7	1,6	T	6	6,0	Y	13	8,5	Y	7	5,2	T	10
Marker2391	9.508	Cma_Chr01	1274042	T	C	T	13	13,0	C	19	0,19	Y	10	6,4	T	6	6,0	C	17	0,17	Y	10	6,4	Y	15	7,8	C	10	0,10	Y	18	11,7	T	20	20,0	Y	7	1,6	T	6	6,0	Y	13	8,5	Y	7	5,2	Y	13
Marker2390	9.508	Cma_Chr01	1274028	A	G	A	14	14,0	G	19	0,19	R	10	6,4	A	6	6,0	G	17	0,17	R	10	6,4	R	15	7,8	G	10	0,10	R	18	11,7	A	20	20,0	R	7	1,6	A	6	6,0	R	13	8,5	R	7	5,2	R	13
Marker2920	13.617	Cma_Chr01	1635104	T	G	G	23	2,21	T	17	17,0	K	9	3,6	G	1	0,1	T	4	4,0	K	4	3,1	K	14	3,11	T	5	5,0	K	10	8,2	K	35	12,23	K	15	7,8	G	2	0,2	K	6	4,2	K	7	5,2	T	6
Marker2860	15.117	Cma_Chr01	1604100	G	A	G	19	18,1	A	24	0,24	R	20	8,12	G	9	9,0	R	13	5,8	R	10	3,7	R	17	5,12	A	15	1,14	R	17	7,10	R	17	5,12	R	15	6,9	G	6	6,0	R	19	12,7	R	18	12,6	R	6
Marker2857	16.118	Cma_Chr01	1603880	A	C	A	12	12,0	C	14	0,14	M	18	7,11	A	8	6,0	M	13	5,8	M	10	4,5	M	17	5,12	M	13	1,12	M	17	6,10	M	17	5,12	M	14	5,8	A	6	6,0	M	19	10,7	M	18	12,6	M	6
Marker2856	16.618	Cma_Chr01	1603838	T	C	T	10	10,0	C	15	0,15	Y	20	8,12	T	9	9,0	Y	13	5,8	Y	9	3,6	Y	17	5,12	C	15	1,14	Y	17	7,10	Y	17	5,12	Y	15	6,9	T	6	6,0	Y	19	12,7	Y	18	12,6	Y	6
Marker2800	17.323	Cma_Chr01	1589421	T	A	T	18	18,0	A	20	0,20	W	8	4,4	W	10	9,1	W	20	12,8	W	24	13,11	W	47	12,35	A	20	0,20	W	18	9,9	W	36	17,19	W	19	11,8	T	13	13,0	W	20	10,10	W	31	18,13	W	18
Marker2833	18.323	Cma_Chr01	1600382	T	A	T	24	23,1	A	19	0,19	W	35	21,14	T	24	24,0	W	37	27,10	W	59	29,30	W	38	9,29	A	22	0,22	W	44	33,11	W	34	17,17	W	29	6,23	T	23	23,0	W	29	13,16	W	40	16,24	W	8
Marker2799	18.323	Cma_Chr01	1589187	A	C	A	17	17,0	C	14	0,14	M	8	4,4	M	10	9,1	M	20	12,8	M	24	13,11	M	47	12,35	C	20	0,20	M	18	9,9	M	36	17,19	M	19	11,8	A	14	14,0	M	19	10,9	M	31	18,13	M	18
Marker2882	18.823	Cma_Chr01	1608615	C	T	C	15	14,1	T	15	0,15	Y	13	4,9	N	.	.	Y	7	4,3	Y	10	7,3	Y	9	4,5	Y	14	1,13	Y	23	10,13	Y	16	6,10	Y	9	3,6	C	9	9,0	Y	8	2,6	Y	20	4,16	Y	5
Marker3016	18.823	Cma_Chr01	1648485	A	T	T	10	0,10	A	17	17,0	W	15	8,7	W	12	3,9	W	47	23,24	W	25	7,18	W	24	12,12	A	23	23,0	W	38	23,13	W	32	15,17	W	39	16,23	T	22	0,22	W	22	13,9	W	19	8,11	W	13
Marker2991	19.823	Cma_Chr01	1643934	G	T	T	21	0,21	G	11	11,0	K	23	9,14	T	2	0,2	K	14	5,9	K	12	4,8	K	10	8,2	G	19	19,0	K	38	11,27	K	20	6,14	K	13	8,5	T	3	0,3	K	11	6,5	K	13	3,10	K	21
Marker3191	20.323	Cma_Chr01	1813460	C	A	C	14	14,0	A	20	0,20	M	6	4,2	C	12	12,0	M	22	15,7	M	11	10,1	M	22	10,12	A	13	0,13	M	10	8,2	M	13	9,4	M	21	6,15	C	8	8,0	M	13	6,7	M	23	13,10	M	13
Marker2703	20.323	Cma_Chr01	1479210	C	T	C	20	19,1	T	21	0,21	Y	11	7,4	C	11	11,0	Y	15	10,5	Y	5	3,2	Y	7	1,6	T	13	0,13	Y	9	4,5	Y	13	7,6	Y	6	2,4	C	4	4,0	Y	9	4,5	C	2	2,0	C	6
Marker3122	20.823	Cma_Chr01	1713466	C	A	A	12	0,12	C	20	20,0	M	10	1,9	A	15	0,15	M	10	8,2	M	7	6,1	M	7	5,2	C	8	8,0	M	5	4,1	M	28	20,8	M	18	7,11	A	3	0,3	M	7	5,2	M	6	3,3	M	9
Marker3402	21.323	Cma_Chr01	1859413	C	G	G	15	0,15	C	13	13,0	S	5	2,3	G	4	0,4	G	12	0,12	S	8	5,3	S	2	1,1	C	6	6,0	S	24	5,19	S	18	9,9	S	17	13,4	G	5	0,5	C	2	2,0	S	15	13,2	S	4
Marker3265	21.323	Cma_Chr01	1823121	A	G	A	13	13,0	G	15	0,15	G	3	0,3	A	6	6,0	R	26	14,12	R	17	11,6	R	21	9,12	G	18	0,18	R	18	11,7	R	7	3,4	R	37	20,17	A	8	8,0	R	22	18,4	R	33	21,12	R	18
Marker3264	21.323	Cma_Chr01	1823077	G	A	G	17	17,0	A	15	0,15	A	3	0,3	G	6	6,0	R	26	14,12	R	17	11,6	R	21	9,12	A	18	0,18	R	18	11,7	R	7	3,4	R	37	20,17	G	8	8,0	R	22	18,4	R	33	21,12	R	18
Marker3263	21.323	Cma_Chr01	1822959	T	C	T	10	10,0	C	19	0,19	C	3	0,3	T	6	6,0	Y	26	14,12	Y	17	11,6	Y	21	9,12	C	18	0,18	Y	18	11,7	Y	7	3,4	Y	37	20,17	T	8	8,0	Y	22	18,4	Y	33	20,12	Y	18
Marker3285	21.323	Cma_Chr01	1825612	A	T	A	15	15,0	T	15	0,15	W	45	23,22	A	57	57,0	W	156	88,68	W	51	23,28	W	103	49,54	T	78	0,78	W	55	34,21	W	29	16,13	W	96	48,48	A	46	46,0	W	176	77,99	W	176	86,90	W	42
Marker3344	21.323	Cma_Chr01	1835038	G	A	G	11	11,0	A	12	0,12	R	5	2,3	G	2	2,0	R	16	6,10	A	2	0,2	R	24	6,18	A	23	0,23	R	21	10,11	R	10	5,5	R	15	6,9	G	5	5,0	R	11	9,2	R	16	8,8	R	10
Marker3232	21.823	Cma_Chr01	1819050	G	A	G	17	17,0	A	14	0,14	R	6	4,2	G	4	4,0	R	5	3,2	R	23	15,8	R	8	7,1	R	4	2,2	R	18	5,13	R	25	8,17	R	19	12,7	G	5	5,0	R	9	3,6	R	10	7,3	G	4
Marker3490	22.823	Cma_Chr01	1914268	A	G	A	11	11,0	G	13	0,13	R	14	8,6	A	10	10,0	R	16	13,3	R	12	8,3	R	11	6,5	G	3	0,3	R	6	4,2	R	16	12,4	R	21	17,4	A	8	8,0	R	17	15,2	R	12	10,2	G	9
Marker3549	24.324	Cma_Chr01	2029894	C	A	A	19	1,18	C	14	14,0	M	2	1,1	A	2	0,2	M	18	8,10	M	12	11,1	M	16	9,7	M	16	14,2	M	19	14,5	M	42	22,20	M	46	16,30	A	7	0,7	M	20	4,16	M	17	11,6	C	19
Marker4258	25.824	Cma_Chr01	2317696	C	G	G	11	0,11	C	22	22,0	S	15	4,11	G	8	0,8	S	11	8,3	S	17	9,8	S	14	4,10	C	9	9,0	S	17	6,11	S	34	17,17	S	28	16,12	G	6	0,6	S	14	9,5	C	11	10,1	C	9
Marker4257	26.324	Cma_Chr01	2317639	C	T	T	12	0,12	C	19	19,0	Y	15	4,10	T	8	0,8	Y	11	8,3	Y	17	9,8	Y	14	4,10	C	9	9,0	Y	17	6,11	Y	34	18,16	Y	28	16,12	T	6	0,6	Y	14	9,5	Y	11	10,1	C	9
Marker3548	26.324	Cma_Chr01	2029694	C	A	A	20	1,19	C	18	18,0	M	2	1,1	A	2	0,2	M	18	8,10	M	12	11,1	M	15	8,7	M	16	14,2	M	19	14,5	M	42	22,20	M	46	16,26	A	7	0,7	M	20	4,16	M	18	12,6	C	19
Marker4351	29.428	Cma_Chr01	2351970	G	A	A	16	1,15	G	16	16,0	R	10	8,2	A	5	0,5	R	3	1,2	R	11	6,5	A	11	1,10	G	7	7,0	R	3	2,1	R	17	6,11	R	6	1,5	A	2	0,2	R	12	9,3	G	8	7,1	G	2
Marker4159	29.928	Cma_Chr01	2299872	A	T	T	20	1,19	A	20	20,0	W	23	7,16	T	13	0,13	W	34	10,24	W	7	4,3	W	14	4,10	A	19	19,0	W	30	12,18	W	17	4,13	W	29	11,18	T	10	0,10	W	30	15,15	A	24	24,0	A	13
Marker4193	29.928	Cma_Chr01	2306383	T	A	A	19	0,19	T	17	17,0	W	19	8,11	A	12	0,12	W	14	7,7	N	.	.	W	7	6,1	T	11	11,0	W	13	9,4	W	72	28,44	W	13	6,7	A	11	0,11	W	18	12,5	W	8	7,1	T	9
Marker4171	29.928	Cma_Chr01	2301898	C	T	T	15	0,15	C	18	18,0	Y	9	3,6	T	9	0,9	Y	14	3,11	Y	17	6,11	Y	7	5,2	C	10	10,0	Y	12	3,9	Y	29	20,9	Y	24	11,13	T	7	0,7	Y	13	7,6	C	22	21,1	Y	7
Marker4352	29.928	Cma_Chr01	2352146	A	C	C	20	1,19	A	14	14,0	M	10	8,2	C	5	0,5	M	3	1,2	M	11	6,5	M	11	1,10	A	7	7,0	M	3	2,1	M	17	6,11	M	6	1,5	C	2	0,2	M	12	9,3	A	8	8,0	A	2
Marker4356	30.928	Cma_Chr01	2352540	C	T	T	17	0,17	C	17	17,0	Y	11	8,3	T	3	0,3	Y	5	4,1	Y	8	6,2	Y	8	3,5	C	9	9,0	Y	4	1,3	Y	18	12,6	Y	13	8,5	T	5	0,5	C	8	8,0	C	10	10,0	C	1
Marker4355	30.928	Cma_Chr01	2352502	T	C	C	16	0,16	T	17	17,0	Y	11	8,3	C	3	0,3	Y	5	4,1	Y	8	6,2	Y	8	3,5	T	9	9,0	Y	4	1,3	Y	18	12,6	Y	13	8,5	C	5	0,5	T	8	8,0	T	10	10,0	T	1
Marker4170	30.928	Cma_Chr01	2301473	T	C	C	25	0,25	T	19	19,0	Y	13	8,5	C	4	0,4	Y	8	4,4	Y	6	1,5	Y	6	4,2	T	3	3,0	Y	7	4,3	Y	27	11,16	Y	13	8,5	N	.	.	Y	7	3,4	T	3	3,0	T	6
Marker4108	30.928	Cma_Chr01	2294407	G	T	T	11	0,11	G	13	13,0	K	6	2,4	K	8	1,7	K	12	5,7	K	7	1,6	T	5	0,5	G	13	13,0	K	14	6,8	K	15	6,9	K	6	1,5	T	2	0,2	K	11	10,1	G	13	13,0	G	7
Marker3973	30.928	Cma_Chr01	2227742	C	T	T	20	2,18	C	23	23,0	Y	33	10,23	T	31	0,31	Y	83	43,40	Y	55	31,24	Y	62	29,33	C	89	87,1	Y	87	44,43	Y	22	10,12	Y	100	45,55	T	41	0,41	Y	107	55,52	C	102	102,0	C	45
Marker4061	30.928	Cma_Chr01	2282290	C	T	T	20	1,19	C	16	16,0	Y	8	1,7	T	2	0,2	Y	21	8,13	Y	9	5,4	Y	15	10,5	C	18	18,0	Y	21	4,17	Y	26	16,10	Y	21	5,16	T	10	0,10	Y	37	28,9	C	26	26,0	C	6
Marker4147	30.928	Cma_Chr01	2297774	A	G	G	14	0,14	A	28	28,0	N	.	.	G	1	0,1	R	14	6,8	G	1	0,1	R	5	3,2	A	6	6,0	R	12	4,8	R	5	3,2	R	31	15,16	G	4	0,4	R	6	1,5	A	16	15,1	A	2
Marker4161	30.928	Cma_Chr01	2300169	C	T	T	23	1,22	C	13	13,0	Y	23	7,16	T	13	0,13	Y	33	10,23	Y	7	4,3	Y	14	4,10	C	19	19,0	Y	30	12,18	Y	20	6,14	Y	30	11,19	T	10	0,10	Y	30	15,15	C	24	24,0	C	13
Marker4160	30.928	Cma_Chr01	2299899	G	A	A	19	1,18	G	17	17,0	R	23	7,16	A	13	0,13	R	34	10,24	R	7	4,3	R	14	4,10	G	19	19,0	R	30	12,18	R	18	4,14	R	29	11,18	A	10	0,10	R	30	15,15	G	24	24,0	G	13
Marker4152	31.428	Cma_Chr01	2298842	G	A	A	22	0,22	G	12	12,0	R	23	9,14	A	36	0,36	R	58	29,29	R	20	8,12	R	41	22,19	G	33	33,0	R	30	15,15	R	38	22,16	R	44	23,21	A	19	0,19	R	49	24,25	G	66	66,0	G	25
Marker4189	31.428	Cma_Chr01	2306193	G	T	T	17	1,16	G	21	21,0	K	18	12,6	T	9	0,9	K	34	11,23	K	27	11,16	K	39	21,18	K	12	11,1	K	40	17,23	K	43	13,30	K	49	25,24	T	13	0,13	K	30	21,9	G	30	28,2	G	11
Marker4396	33.429	Cma_Chr01	2398121	A	G	G	19	0,19	A	22	22,0	R	15	9,6	G	11	0,11	R	18	12,6	R	21	15,6	R	14	4,10	A	1	1,0	R	20	6,14	R	23	14,9	R	9	4,5	G	6	0,6	R	4	2,2	A	20	20,0	A	7
Marker5223	34.93	Cma_Chr01	2858352	T	G	G	27	0,27	T	15	15,0	K	13	8,5	G	10	1,9	G	9	0,9	K	9	7,2	K	8	5,3	K	7	4,3	K	9	2,7	K	14	8,6	K	7	1,6	T	2	2,0	K	12	5,7	T	6	6,0	T	9
Marker5047	35.635	Cma_Chr01	2821673	C	T	C	18	17,1	T	16	0,16	Y	13	8,5	C	5	5,0	C	16	16,0	Y	14	4,10	Y	9	2,7	Y	33	14,19	Y	11	3,8	Y	27	7,20	T	3	0,3	Y	2	1,1	Y	17	10,7	T	19	0,19	T	7
Marker5464	40.854	Cma_Chr01	2971516	T	C	T	23	23,0	C	17	0,17	Y	4	3,1	Y	4	3,1	T	11	11,0	Y	5	1,4	Y	4	2,2	Y	13	5,8	Y	23	14,9	C	45	0,45	Y	23	12,11	Y	10	3,7	T	10	10,0	C	10	0,10	Y	14
Marker5046	42.354	Cma_Chr01	2821438	T	A	T	27	26,1	A	18	0,18	W	13	8,5	T	5	5,0	T	16	16,0	W	14	4,10	W	9	2,7	W	33	14,19	W	11	3,8	W	27	7,20	A	3	0,3	W	2	1,1	W	16	9,7	A	19	0,19	A	7
Marker5512	44.355	Cma_Chr01	3043955	T	C	C	16	0,16	T	14	14,0	Y	8	5,3	C	10	0,10	C	12	0,12	Y	8	2,6	Y	21	14,7	Y	16	5,11	Y	33	11,22	T	25	25,0	Y	24	18,6	Y	9	4,5	C	15	0,15	T	16	16,0	T	8
Marker5507	45.856	Cma_Chr01	3014028	G	C	G	24	24,0	C	15	0,15	S	20	10,10	G	18	18,0	G	24	23,1	S	15	7,8	S	45	24,21	S	28	14,14	S	33	17,16	C	34	0,34	S	43	11,32	S	35	17,18	G	51	51,0	C	57	1,56	C	33
Marker5867	46.876	Cma_Chr01	3164591	T	C	T	16	16,0	C	28	0,28	Y	18	11,7	C	21	0,21	T	36	35,1	Y	28	10,18	Y	52	11,41	Y	41	19,22	Y	46	22,24	C	36	1,35	Y	36	26,10	Y	30	15,15	T	62	62,0	C	48	1,47	C	49
Marker5508	46.876	Cma_Chr01	3015181	A	C	A	11	11,0	C	17	0,17	M	7	3,4	M	6	5,1	A	17	17,0	M	7	2,5	M	30	12,18	M	11	7,4	M	41	9,32	C	29	0,29	M	25	12,13	M	12	4,8	A	29	28,1	C	35	0,35	C	14
Marker5474	46.876	Cma_Chr01	2985831	T	C	T	16	16,0	C	13	0,13	Y	30	16,14	T	25	25,0	T	108	108,0	Y	53	25,28	Y	88	66,21	Y	64	22,42	Y	61	29,32	C	44	0,44	Y	67	30,37	Y	35	19,16	T	113	112,1	C	117	2,115	C	33
Marker6166	47.581	Cma_Chr01	3250002	C	T	T	12	0,12	C	23	23,0	Y	16	7,9	C	11	11,0	T	12	0,12	Y	18	6,12	Y	16	13,3	Y	7	3,4	C	22	22,0	C	22	22,0	Y	17	4,13	Y	5	1,4	T	18	0,18	C	20	20,0	C	11
Marker6108	48.602	Cma_Chr01	3235341	C	T	T	18	1,17	C	13	13,0	Y	17	10,7	C	16	16,0	T	25	0,25	Y	4	1,3	Y	24	12,12	Y	11	3,8	C	17	17,0	C	13	13,0	Y	32	9,23	Y	10	1,9	T	18	0,18	C	16	16,0	C	14
Marker6106	49.102	Cma_Chr01	3235274	T	C	C	17	0,17	T	20	20,0	Y	17	10,7	T	16	16,0	C	25	0,25	Y	4	1,3	Y	24	12,12	Y	11	3,8	T	17	17,0	T	13	13,0	Y	32	9,23	Y	10	1,9	C	18	0,18	T	17	17,0	T	14
Marker6101	49.102	Cma_Chr01	3235095	C	A	A	21	1,20	C	21	21,0	M	18	10,8	C	16	16,0	A	25	0,25	M	4	1,3	M	24	12,12	M	11	3,8	C	17	17,0	C	13	13,0	M	32	9,23	M	10	1,9	A	18	0,18	C	17	17,0	C	14
Marker6102	49.102	Cma_Chr01	3235142	T	C	C	21	1,20	T	17	17,0	Y	18	10,8	T	14	14,0	C	25	0,25	Y	4	1,3	Y	24	12,12	Y	8	1,7	T	15	15,0	T	8	8,0	Y	32	9,22	Y	9	1,8	C	18	0,18	T	17	17,0	T	14
Marker6107	49.602	Cma_Chr01	3235334	G	A	A	19	1,18	G	15	15,0	R	17	10,7	G	16	16,0	A	25	0,25	R	4	1,3	R	24	12,12	R	11	3,8	G	17	17,0	G	13	13,0	R	32	9,23	R	10	1,9	A	18	0,18	G	16	16,0	G	14
Marker5833	50.602	Cma_Chr01	3157542	C	A	A	11	0,11	C	19	19,0	M	21	12,9	C	3	3,0	A	18	1,17	M	16	6,10	M	12	2,10	M	4	1,3	M	33	20,13	C	46	45,0	M	25	10,15	M	13	3,10	A	15	0,15	M	13	12,1	C	9
Marker6781	52.102	Cma_Chr01	3401169	A	G	A	14	14,0	G	16	0,16	R	5	2,3	G	3	0,3	A	39	39,0	A	3	2,0	R	24	13,11	R	11	8,3	R	18	15,3	G	2	0,2	R	6	2,4	R	20	17,3	A	37	37,0	G	32	0,32	R	14
Marker5832	52.102	Cma_Chr01	3157532	G	A	A	12	0,12	G	19	19,0	R	21	12,9	G	3	3,0	A	18	1,17	R	16	6,10	R	12	2,10	A	4	1,3	R	33	20,13	G	46	46,0	R	25	10,15	R	13	3,10	A	15	0,15	R	13	12,1	G	9
Marker5831	52.102	Cma_Chr01	3157518	A	G	G	14	0,14	A	20	20,0	R	21	12,9	A	3	3,0	G	18	1,17	R	16	6,10	R	12	2,10	R	4	1,3	R	33	20,13	A	46	46,0	R	25	10,15	R	13	3,10	G	15	0,15	R	13	12,1	A	9
Marker6052	53.103	Cma_Chr01	3229632	C	G	G	18	1,17	C	15	15,0	S	9	3,6	C	8	8,0	G	13	0,13	S	13	6,7	G	8	0,8	S	9	3,6	S	13	12,1	C	12	12,0	S	19	2,17	S	4	2,2	G	6	0,6	C	29	29,0	C	9
Marker6787	53.613	Cma_Chr01	3404530	C	T	C	18	18,0	T	21	0,21	Y	6	5,1	T	11	0,11	C	13	13,0	Y	11	4,7	Y	5	1,4	Y	11	4,7	Y	12	5,7	T	21	0,21	Y	16	9,7	Y	4	1,3	C	17	17,0	T	21	1,20	Y	7
Marker6807	55.113	Cma_Chr01	3409591	T	C	T	14	14,0	C	25	0,25	Y	13	2,11	C	15	0,15	T	22	22,0	Y	35	16,19	Y	12	1,11	Y	12	9,3	Y	39	20,19	C	26	1,25	Y	27	13,14	T	13	12,1	T	22	22,0	C	4	0,4	Y	19
Marker6806	55.113	Cma_Chr01	3409566	A	G	A	17	17,0	G	23	0,23	R	13	2,11	G	15	0,15	A	22	22,0	R	35	15,19	R	12	1,11	R	12	9,3	R	39	20,19	G	26	1,25	R	27	13,14	R	13	12,1	A	22	22,0	G	4	0,4	R	19
Marker6805	55.613	Cma_Chr01	3409548	G	A	G	18	18,0	A	23	0,23	R	13	2,11	A	15	0,15	G	22	22,0	R	35	15,19	R	12	1,11	R	12	9,3	R	39	20,19	A	26	1,25	R	27	13,14	R	13	12,1	G	22	22,0	A	4	0,4	R	19
Marker6803	55.613	Cma_Chr01	3409362	G	A	G	18	18,0	A	14	0,14	R	13	2,11	A	15	0,15	G	22	22,0	R	35	16,19	R	12	1,11	R	12	9,3	R	39	20,19	A	26	1,25	R	27	13,14	R	13	12,1	G	22	22,0	A	4	0,4	R	18
Marker6802	55.613	Cma_Chr01	3409320	C	T	C	14	13,1	T	15	0,15	Y	13	2,11	T	15	0,15	C	22	22,0	Y	35	16,19	Y	12	1,11	Y	12	9,3	Y	39	20,19	T	26	1,25	Y	27	13,14	Y	13	12,1	C	22	22,0	T	4	0,4	Y	18
Marker6574	55.613	Cma_Chr01	3353518	G	A	A	19	0,19	G	20	20,0	R	11	7,4	G	19	19,0	A	9	0,9	R	7	6,1	R	4	1,3	R	5	4,1	R	18	9,9	G	17	16,1	R	8	4,4	R	15	8,7	A	16	0,16	G	15	15,0	R	3
Marker6994	56.613	Cma_Chr01	3486936	C	T	C	18	18,0	T	13	0,13	Y	19	12,7	T	25	0,25	C	69	69,0	Y	25	14,11	Y	24	14,10	Y	33	17,16	Y	53	21,32	T	36	1,35	Y	65	38,27	Y	29	17,12	C	60	59,1	T	46	0,46	Y	28
Marker6993	56.613	Cma_Chr01	3486924	A	C	A	17	17,0	C	13	0,13	M	19	12,7	C	25	0,25	A	69	69,0	M	25	14,11	M	24	14,10	M	33	17,16	M	53	21,32	C	36	1,35	M	65	38,27	M	29	17,12	A	60	59,0	C	46	0,46	M	28
Marker6992	56.613	Cma_Chr01	3486903	T	C	T	17	17,0	C	14	0,14	Y	19	12,7	C	26	0,25	T	69	69,0	Y	25	14,11	Y	24	14,10	Y	33	17,16	Y	53	21,32	C	36	1,35	Y	66	39,27	Y	29	17,12	T	60	59,1	C	46	0,46	Y	28
Marker6986	56.613	Cma_Chr01	3486765	A	T	A	12	12,0	T	18	0,18	W	15	8,7	T	25	0,25	A	69	69,0	W	20	10,10	W	24	14,10	W	33	17,16	W	52	20,32	T	36	1,35	W	62	35,26	W	28	16,12	A	60	59,1	T	45	0,45	W	27
Marker6801	56.613	Cma_Chr01	3409314	G	C	G	18	17,1	C	15	0,15	S	13	2,11	C	15	0,15	G	22	22,0	S	35	16,19	S	12	1,11	S	12	9,3	S	39	20,19	C	26	1,25	S	27	13,14	G	13	12,1	G	22	22,0	C	4	0,4	S	18
Marker6974	57.124	Cma_Chr01	3485684	G	T	G	15	15,0	T	18	0,18	K	16	14,2	T	8	0,8	G	14	14,0	K	3	2,1	G	6	6,0	K	13	2,11	K	19	11,8	T	9	0,9	K	20	16,4	G	4	4,0	G	10	10,0	T	7	0,7	K	23
Marker6973	57.124	Cma_Chr01	3485676	C	T	C	14	14,0	T	16	0,16	Y	16	14,2	T	8	0,8	C	14	14,0	Y	3	2,1	C	6	6,0	Y	13	2,11	Y	19	11,8	T	9	0,9	Y	20	16,4	C	4	4,0	C	10	10,0	T	7	0,7	Y	23
Marker6347	57.624	Cma_Chr01	3291312	T	A	A	13	0,13	T	14	14,0	W	24	13,11	T	32	31,1	A	60	0,60	W	27	13,14	W	21	10,11	W	21	3,18	W	50	24,26	T	36	36,0	W	54	28,26	W	11	7,4	A	57	0,57	T	43	43,0	W	11
Marker6828	58.129	Cma_Chr01	3415619	A	G	A	26	25,1	G	17	0,17	R	28	20,8	G	8	0,8	A	32	31,1	R	11	6,5	R	19	9,10	R	18	10,8	R	60	38,22	G	33	0,33	R	45	24,21	R	25	18,7	A	38	38,0	G	33	1,32	R	10
Marker6346	58.129	Cma_Chr01	3291302	A	C	C	13	0,13	A	15	15,0	M	24	13,11	A	32	31,1	C	60	0,60	M	27	13,14	M	21	10,11	M	21	3,18	M	50	24,26	A	36	36,0	M	54	28,26	M	11	7,4	C	57	0,57	A	43	43,0	M	11
Marker6096	58.629	Cma_Chr01	3233388	T	C	C	16	1,15	T	15	15,0	Y	9	2,7	T	20	20,0	C	51	0,51	Y	13	4,9	Y	21	6,15	Y	12	8,4	T	31	31,0	T	20	19,1	Y	35	23,12	Y	22	11,11	C	42	0,42	T	38	38,0	Y	27
Marker7204	59.129	Cma_Chr01	3692468	C	T	T	18	0,18	C	14	14,0	Y	3	1,2	C	5	5,0	T	6	0,6	Y	9	6,3	Y	12	5,7	Y	7	2,5	Y	13	12,1	C	40	40,0	C	4	4,0	Y	11	2,9	T	7	0,7	C	1	1,0	Y	5
Marker7203	59.629	Cma_Chr01	3692438	C	T	T	17	0,17	C	15	15,0	Y	3	1,2	C	5	5,0	T	6	0,6	Y	9	6,3	Y	12	5,7	Y	7	2,5	Y	13	12,1	C	40	40,0	C	5	5,0	Y	11	2,9	T	7	0,7	C	1	1,0	Y	5
Marker7235	61.129	Cma_Chr01	3695118	G	A	G	14	14,0	A	14	0,14	R	17	10,7	A	17	0,17	G	21	21,0	R	21	14,7	R	17	6,11	R	21	6,15	R	22	9,13	A	16	0,16	R	22	12,10	R	12	4,8	G	20	20,0	A	14	0,14	R	20
Marker7464	61.629	Cma_Chr01	3772525	C	T	C	12	12,0	T	19	0,19	Y	37	17,20	T	39	0,39	C	107	106,1	Y	62	27,35	Y	123	75,48	Y	52	26,25	Y	61	36,25	T	22	0,22	Y	82	39,43	Y	55	24,31	C	147	146,1	T	87	0,87	Y	55
Marker7185	61.629	Cma_Chr01	3691001	G	A	G	17	17,0	A	26	0,26	R	19	13,6	A	3	0,3	G	17	17,0	R	11	3,8	R	30	10,20	R	17	9,8	R	6	1,5	A	39	0,39	R	21	6,15	R	8	6,2	G	11	11,0	A	9	0,9	R	13
Marker7430	61.629	Cma_Chr01	3765012	G	A	G	21	20,1	A	27	0,27	R	20	16,4	A	10	0,10	G	34	34,0	R	10	3,7	G	23	21,2	R	13	4,9	R	17	10,7	R	4	1,3	R	51	24,27	A	1	0,1	G	22	21,1	A	3	0,3	R	15
Marker7484	61.629	Cma_Chr01	3774880	C	A	C	18	18,0	A	20	0,20	M	17	11,6	A	24	0,24	C	49	49,0	M	16	3,13	M	18	9,9	M	11	5,6	M	39	19,20	A	58	0,58	M	45	22,23	M	15	6,9	C	18	18,0	A	37	1,36	M	28
Marker7202	61.629	Cma_Chr01	3692396	C	T	T	19	0,19	C	13	13,0	Y	3	1,2	C	5	5,0	T	6	0,6	Y	9	6,3	Y	12	5,7	Y	7	2,5	Y	13	12,1	C	40	40,0	C	5	5,0	Y	11	2,9	T	7	0,7	C	1	1,0	Y	5
Marker7201	61.629	Cma_Chr01	3692381	C	T	T	14	0,14	C	13	13,0	Y	3	1,2	C	5	5,0	T	6	0,6	Y	9	6,3	Y	12	5,7	Y	7	2,5	Y	13	12,1	C	40	40,0	C	5	5,0	Y	11	2,9	T	7	0,7	C	1	1,0	Y	5
Marker7435	62.129	Cma_Chr01	3765779	C	T	T	13	0,13	C	20	20,0	Y	22	13,9	C	11	11,0	T	4	0,4	Y	15	3,12	Y	9	3,6	Y	5	2,3	Y	10	1,9	C	26	26,0	Y	5	1,4	Y	6	1,5	T	7	0,7	C	4	4,0	Y	4
Marker7481	62.129	Cma_Chr01	3774665	A	G	A	15	15,0	G	18	0,18	R	17	11,6	G	25	0,25	A	50	49,1	R	15	2,13	R	18	9,9	R	11	5,6	R	39	19,20	G	58	0,58	R	44	22,22	R	15	6,9	A	18	18,0	G	37	0,37	R	29
Marker7434	62.629	Cma_Chr01	3765755	C	G	C	13	13,0	G	21	0,21	S	21	7,13	G	11	0,11	C	4	4,0	S	15	12,3	S	9	6,3	S	5	3,2	S	10	9,1	G	26	0,26	S	5	4,1	S	6	5,1	C	7	7,0	G	4	0,4	S	4
Marker7433	62.629	Cma_Chr01	3765560	A	C	A	22	21,1	C	20	0,20	M	22	9,13	C	11	0,11	A	4	4,0	M	15	12,3	M	9	6,3	M	5	3,2	M	10	9,1	C	26	0,26	M	5	4,1	M	6	5,1	A	7	7,0	C	4	0,4	M	4
Marker7705	62.629	Cma_Chr01	3808687	C	T	C	21	21,0	T	19	0,19	Y	27	10,17	T	12	0,11	C	92	92,0	Y	20	12,8	Y	46	30,15	Y	52	27,25	Y	62	21,41	T	37	1,36	Y	68	42,26	Y	48	31,17	C	94	93,1	T	94	0,94	Y	48
Marker7633	62.629	Cma_Chr01	3800860	T	C	T	20	19,1	C	15	0,15	Y	7	2,5	C	14	0,14	T	40	40,0	Y	20	15,5	Y	33	24,9	Y	12	5,7	Y	53	30,23	C	7	0,7	Y	24	21,3	Y	28	3,25	T	25	25,0	C	49	1,48	Y	23
Marker7788	62.629	Cma_Chr01	3846784	A	C	C	25	0,25	A	17	17,0	M	2	1,1	A	4	4,0	M	14	1,13	C	4	0,4	C	11	0,11	M	8	3,5	M	14	7,7	A	10	10,0	M	11	9,2	C	3	0,3	M	12	1,11	A	25	25,0	M	11
Marker7615	62.629	Cma_Chr01	3798096	T	C	C	16	1,15	T	27	27,0	Y	8	3,5	T	3	3,0	C	12	0,12	Y	13	3,10	Y	9	4,5	Y	7	3,4	Y	11	3,8	T	22	22,0	Y	6	2,4	C	3	0,3	C	10	0,10	T	10	10,0	N	.
Marker7614	62.629	Cma_Chr01	3798046	C	T	T	15	1,14	C	24	24,0	Y	8	3,5	C	3	3,0	T	12	0,12	Y	13	3,10	Y	9	4,5	Y	7	3,4	Y	11	3,8	C	22	22,0	Y	5	1,4	T	3	0,3	T	10	0,10	C	10	10,0	N	.
Marker8153	64.13	Cma_Chr01	4030223	T	G	G	22	1,21	T	16	16,0	K	13	10,3	T	2	2,0	G	8	0,8	K	12	8,4	K	15	7,8	K	15	7,8	K	18	10,8	T	14	14,0	K	8	7,1	K	3	2,1	G	17	0,17	T	17	17,0	K	2
Marker7913	64.63	Cma_Chr01	3932408	G	A	A	18	0,18	G	19	19,0	R	12	9,3	G	12	12,0	A	10	0,10	R	5	2,3	R	10	8,2	R	18	10,8	R	16	4,12	G	15	15,0	R	6	2,4	R	7	4,3	A	6	0,6	G	19	19,0	R	6
Marker8342	64.63	Cma_Chr01	4089439	A	C	C	12	0,12	A	16	16,0	M	11	8,3	A	8	8,0	C	15	0,15	A	5	5,0	M	9	3,6	M	9	5,4	M	6	3,3	A	15	15,0	M	5	3,2	M	7	2,5	C	14	0,14	M	10	9,1	M	9
Marker8344	64.63	Cma_Chr01	4089499	T	C	C	16	0,16	T	21	21,0	Y	11	8,3	T	8	8,0	C	15	0,15	T	5	5,0	Y	9	3,6	Y	9	5,4	Y	6	3,3	T	15	15,0	Y	5	3,2	Y	7	2,5	C	14	0,14	Y	10	9,1	Y	9
Marker8156	64.63	Cma_Chr01	4030487	C	T	T	22	0,22	C	19	19,0	Y	13	10,3	C	2	2,0	T	7	0,7	Y	12	8,4	Y	15	7,8	Y	14	7,7	Y	18	10,8	C	14	14,0	Y	8	7,1	Y	4	2,2	T	17	0,17	C	17	17,0	Y	2
Marker8343	64.63	Cma_Chr01	4089490	G	T	T	16	0,16	G	21	21,0	K	11	8,3	G	8	8,0	T	15	0,15	G	5	5,0	K	9	3,6	K	9	5,4	K	6	3,3	G	15	15,0	K	5	3,2	K	7	2,5	T	14	0,14	K	10	9,1	K	9
Marker7912	65.13	Cma_Chr01	3932368	T	C	C	19	0,19	T	15	15,0	Y	12	9,3	T	12	12,0	C	10	0,10	Y	5	2,3	Y	10	8,2	Y	18	10,8	Y	16	4,12	T	15	15,0	Y	6	2,4	Y	7	4,3	C	6	0,6	T	19	19,0	Y	6
Marker7911	65.13	Cma_Chr01	3932168	C	T	T	14	0,14	C	14	14,0	Y	11	8,3	C	12	12,0	T	10	0,10	Y	5	2,3	Y	10	8,2	Y	18	10,8	Y	16	4,12	C	15	15,0	Y	6	2,4	Y	7	4,3	T	6	0,6	C	19	19,0	Y	6
Marker7910	65.13	Cma_Chr01	3932152	C	G	G	16	0,16	C	15	15,0	S	11	8,3	C	12	12,0	G	10	0,10	S	5	2,3	S	10	8,2	S	18	10,8	S	16	4,12	C	15	15,0	S	6	2,4	S	7	4,3	G	6	0,6	C	19	19,0	S	6
Marker8176	65.63	Cma_Chr01	4034801	C	T	T	10	0,10	C	13	13,0	Y	5	3,2	C	9	9,0	T	9	0,9	Y	7	4,3	Y	9	7,2	Y	12	7,5	Y	8	4,4	C	16	16,0	Y	14	8,6	C	3	3,0	T	9	0,9	C	22	22,0	Y	7
Marker7903	66.135	Cma_Chr01	3931652	A	G	G	15	0,15	A	14	14,0	R	17	6,11	A	5	5,0	G	18	0,18	R	34	19,15	R	19	12,7	R	41	23,18	R	23	15,8	A	17	17,0	R	29	16,13	R	21	9,12	G	19	0,19	A	40	39,1	R	5
Marker7992	66.135	Cma_Chr01	3949233	T	C	C	11	0,11	T	17	17,0	Y	28	15,13	T	20	20,0	C	39	1,38	Y	17	8,9	Y	21	15,6	Y	30	21,9	Y	26	12,14	T	15	15,0	Y	24	14,10	Y	16	7,9	C	31	0,31	T	30	28,2	Y	21
Marker7993	66.135	Cma_Chr01	3949799	C	T	T	22	2,20	C	16	16,0	Y	15	7,8	Y	14	13,1	T	23	0,23	Y	10	5,5	Y	44	29,15	Y	23	19,4	Y	30	10,20	C	29	29,0	Y	18	11,7	Y	7	4,3	T	21	0,21	C	23	23,0	Y	13
Marker7864	66.135	Cma_Chr01	3921914	G	A	A	12	0,12	G	16	16,0	A	5	0,5	G	4	4,0	A	9	0,9	R	8	3,5	G	1	1,0	R	6	4,2	R	11	5,6	G	13	13,0	R	18	6,12	G	2	2,0	A	8	0,8	G	16	16,0	R	5
Marker7879	66.135	Cma_Chr01	3925150	C	T	T	10	0,10	C	18	18,0	Y	11	4,7	C	12	12,0	T	27	0,27	Y	17	9,8	Y	26	17,9	Y	19	10,9	Y	21	11,10	C	10	10,0	Y	33	16,17	Y	10	5,5	T	32	0,32	C	15	15,0	Y	12
Marker8178	66.135	Cma_Chr01	4034993	G	C	C	11	0,11	G	26	26,0	S	5	3,2	G	9	9,0	C	9	0,9	S	7	4,3	S	9	7,2	S	12	7,5	S	8	4,4	G	16	16,0	S	14	8,6	G	3	3,0	C	9	0,9	G	22	22,0	S	7
Marker8182	66.845	Cma_Chr01	4035910	C	G	G	22	0,22	C	14	14,0	S	4	1,3	C	3	3,0	G	9	0,9	G	1	0,1	S	8	6,2	S	6	4,2	S	10	9,1	C	12	12,0	S	8	2,6	S	4	1,3	G	4	0,4	C	16	16,0	S	8
Marker8224	66.845	Cma_Chr01	4077315	A	T	T	17	1,16	A	24	24,0	W	7	6,1	A	1	1,0	T	6	0,6	A	8	8,0	A	2	2,0	W	6	3,3	W	8	2,6	A	15	15,0	W	12	7,5	A	6	6,0	T	10	0,10	A	7	7,0	T	4
Marker7900	67.345	Cma_Chr01	3931393	A	T	T	19	0,19	A	15	15,0	W	21	10,11	A	5	5,0	T	16	0,16	W	34	19,15	W	19	12,7	W	41	23,18	W	22	14,8	A	17	17,0	W	29	16,13	W	21	9,12	T	19	0,19	A	41	41,0	W	5
Marker7904	67.345	Cma_Chr01	3931703	G	C	C	17	0,17	G	19	19,0	S	17	6,11	G	5	5,0	C	18	0,18	S	34	19,15	S	19	12,7	S	41	23,18	S	23	15,8	G	17	17,0	S	29	16,13	S	21	9,12	C	19	0,19	G	40	39,1	S	5
Marker8223	67.345	Cma_Chr01	4077302	A	C	C	16	1,15	A	20	20,0	M	7	6,1	A	1	1,0	C	6	0,6	A	8	8,0	M	5	2,3	M	7	4,3	M	8	2,6	A	15	15,0	M	12	7,5	M	7	6,1	M	11	1,10	A	7	7,0	M	5
Marker8510	68.345	Cma_Chr01	4447316	C	T	C	19	19,0	T	20	0,20	Y	9	3,6	T	4	0,4	Y	9	3,6	T	14	0,14	Y	13	4,9	C	14	14,0	Y	10	6,4	T	38	0,38	Y	23	8,15	Y	6	4,2	C	9	9,0	T	13	0,13	Y	8
Marker8509	69.05	Cma_Chr01	4447277	G	A	G	17	17,0	A	23	0,23	R	9	3,6	A	4	0,4	R	9	3,6	A	14	0,14	R	13	4,9	G	14	14,0	R	10	6,4	A	38	0,38	R	23	8,15	R	6	4,2	G	9	9,0	A	13	0,13	R	8
Marker8240	69.555	Cma_Chr01	4078359	T	G	G	16	0,16	T	11	11,0	K	10	2,8	T	8	8,0	G	8	0,8	T	3	3,0	K	7	3,4	K	8	2,6	K	10	6,4	T	14	14,0	K	14	10,4	K	4	1,3	G	5	0,5	T	11	11,0	K	6
Marker8241	69.555	Cma_Chr01	4078413	G	A	A	15	0,15	G	12	12,0	R	10	2,8	G	8	8,0	A	8	0,8	G	3	3,0	R	7	3,4	R	8	2,6	R	10	6,4	G	14	14,0	R	14	10,4	R	5	2,3	A	5	0,5	G	11	11,0	R	6
Marker8235	69.555	Cma_Chr01	4078119	C	T	T	20	1,19	C	10	10,0	Y	10	2,8	C	8	8,0	T	8	0,8	C	3	3,0	Y	8	4,4	Y	8	2,6	Y	10	6,4	C	14	14,0	Y	14	10,4	Y	5	2,3	T	5	0,5	C	11	11,0	Y	6
Marker8628	76.5	Cma_Chr01	4504061	T	C	T	19	18,1	C	15	0,15	Y	7	2,5	C	21	0,21	Y	39	23,15	C	22	0,22	Y	45	21,24	T	21	20,1	Y	23	7,16	C	25	0,25	Y	24	10,14	Y	18	7,11	T	36	36,0	C	37	2,35	Y	19
Marker8534	77.5	Cma_Chr01	4466514	C	G	C	16	15,1	G	18	0,18	S	7	6,1	G	6	0,6	S	18	8,10	G	12	0,12	S	6	1,5	C	7	7,0	S	5	4,1	S	10	1,9	S	11	4,7	C	2	2,0	C	9	9,0	G	8	0,8	S	10
Marker8626	77.5	Cma_Chr01	4503774	C	G	C	14	14,0	G	13	0,13	S	7	2,5	G	21	0,21	S	40	23,17	G	22	0,22	S	44	20,24	C	21	20,1	S	23	7,16	G	25	0,25	S	24	10,14	S	18	7,11	C	37	36,1	G	37	2,35	S	19
Marker8778	77.5	Cma_Chr01	4541298	C	G	C	15	14,1	G	16	0,16	G	4	0,4	G	9	0,9	S	8	3,5	G	10	0,10	S	23	15,8	C	9	9,0	S	17	9,8	G	4	0,4	S	18	12,6	S	3	2,1	C	17	17,0	G	8	0,8	S	6
Marker8627	77.5	Cma_Chr01	4504031	T	G	T	17	17,0	G	15	0,15	K	7	2,5	G	21	0,21	K	39	23,16	G	22	0,22	K	45	21,24	T	21	20,1	K	23	7,16	G	25	0,25	K	24	10,14	K	18	7,11	T	36	36,0	G	37	2,35	K	19
Marker8869	78.5	Cma_Chr01	4560308	A	G	A	13	13,0	G	17	0,17	R	10	4,6	G	11	0,11	R	25	19,6	G	6	0,6	R	26	11,15	A	33	33,0	R	21	18,3	G	40	1,39	R	18	16,2	R	9	2,7	A	42	42,0	R	8	1,7	R	5
Marker8870	79	Cma_Chr01	4560341	G	A	G	13	13,0	A	19	0,19	R	10	4,6	A	11	0,11	R	25	19,6	A	6	0,6	R	26	11,15	G	33	33,0	R	21	18,3	A	40	1,39	R	18	16,2	R	9	2,7	G	42	42,0	R	8	1,7	R	5
Marker8629	79.705	Cma_Chr01	4504739	A	T	A	22	21,1	T	14	0,14	W	26	22,4	T	11	0,11	W	10	6,4	T	16	0,16	W	16	11,5	A	10	10,0	W	12	5,7	T	35	0,35	W	12	9,3	W	9	4,5	A	8	8,0	T	6	0,6	W	13
Marker8868	80.705	Cma_Chr01	4560278	T	G	T	14	14,0	G	19	0,19	K	10	4,6	G	11	0,11	K	25	19,6	G	6	0,6	K	26	11,15	T	33	33,0	K	21	18,3	G	40	1,39	K	18	16,2	K	9	2,7	T	42	42,0	K	8	1,7	K	5
Marker9298	81.41	Cma_Chr01	4679427	A	G	A	18	17,1	G	16	1,15	R	5	3,2	G	11	0,11	R	15	8,7	G	4	0,4	R	8	3,5	A	9	9,0	R	21	13,8	G	141	0,141	R	14	7,7	R	10	5,5	A	20	20,0	R	26	18,8	R	10
Marker9494	81.91	Cma_Chr01	4716766	G	C	G	18	17,1	C	18	0,18	S	13	5,8	C	15	0,15	S	59	21,38	C	24	0,24	S	21	2,18	G	13	13,0	S	35	16,19	C	47	0,47	S	64	29,35	S	7	3,4	G	53	53,0	S	29	11,18	S	23
Marker8998	82.41	Cma_Chr01	4628274	T	C	T	11	11,0	C	10	0,10	Y	12	5,7	C	7	0,7	Y	8	5,3	C	9	0,9	Y	28	8,20	T	15	15,0	Y	36	12,24	C	15	0,15	Y	21	10,11	Y	7	3,4	T	12	12,0	Y	13	6,7	Y	5
Marker9328	83.411	Cma_Chr01	4681459	G	C	G	11	11,0	C	13	0,13	S	15	9,6	C	14	0,14	S	50	24,26	C	25	0,25	S	35	18,17	G	20	20,0	S	28	11,17	S	4	1,3	S	33	17,16	S	23	13,10	G	58	58,0	S	46	29,17	S	35
Marker8997	83.911	Cma_Chr01	4628245	T	G	T	10	10,0	G	11	0,11	K	12	5,7	G	7	0,7	K	8	5,3	G	9	0,9	K	28	8,20	T	15	15,0	K	36	12,24	G	15	0,15	K	21	10,11	K	7	3,4	T	12	12,0	K	13	6,7	K	5
Marker8995	84.411	Cma_Chr01	4628194	G	A	G	14	14,0	A	18	0,18	R	12	5,7	A	7	0,7	R	8	5,3	A	9	0,9	R	27	8,19	G	15	15,0	R	35	12,23	A	15	0,15	R	20	10,10	R	7	3,4	G	12	12,0	R	13	6,7	R	5
Marker10832	84.916	Cma_Chr01	5071646	C	G	G	15	0,15	C	20	20,0	S	11	6,5	C	2	2,0	S	37	13,24	S	6	5,1	S	25	19,6	G	23	0,23	S	56	15,41	C	12	12,0	G	27	0,27	S	20	6,14	G	23	0,22	S	49	29,20	S	52
Marker9845	84.916	Cma_Chr01	4975513	A	G	G	12	0,12	A	21	21,0	R	8	2,6	A	2	2,0	R	17	7,10	A	10	10,0	R	9	2,7	G	22	0,22	R	22	7,15	A	9	9,0	G	22	0,22	R	6	1,5	G	24	0,24	R	21	8,13	R	15
Marker8996	84.916	Cma_Chr01	4628226	C	T	C	10	10,0	T	16	0,16	Y	12	5,7	T	7	0,7	Y	8	5,3	T	9	0,9	Y	28	8,20	C	15	15,0	Y	36	12,24	T	15	0,15	Y	21	10,11	Y	7	3,4	C	12	12,0	Y	13	6,7	Y	5
Marker10321	86.917	Cma_Chr01	5024502	T	G	G	19	0,19	T	16	16,0	K	7	3,4	T	8	8,0	K	15	10,5	T	3	3,0	K	6	1,5	G	25	0,25	K	14	8,6	T	15	14,1	G	32	2,30	K	5	2,3	G	10	0,10	K	17	8,9	K	9
Marker10521	87.417	Cma_Chr01	5042033	G	A	A	18	0,18	G	17	17,0	R	8	5,3	G	8	8,0	R	12	9,3	G	14	14,0	R	9	5,4	A	18	0,18	R	6	4,2	G	46	45,1	A	9	0,9	R	2	1,1	A	11	0,11	R	19	2,17	R	6
Marker9844	87.417	Cma_Chr01	4975434	T	G	G	10	0,10	T	18	18,0	K	8	2,6	T	2	2,0	K	17	6,11	T	10	10,0	K	9	2,7	G	22	0,22	K	22	6,15	T	9	9,0	G	22	0,22	K	6	1,5	G	24	0,24	K	21	8,13	K	15
Marker10738	87.417	Cma_Chr01	5059731	G	A	A	24	0,24	G	18	18,0	R	13	4,9	G	15	15,0	R	41	25,16	G	16	16,0	R	47	27,20	A	24	1,23	R	53	27,26	G	18	18,0	A	21	0,21	R	30	22,8	A	49	0,49	R	30	19,11	R	37
Marker10736	87.417	Cma_Chr01	5059513	G	C	C	19	0,19	G	10	10,0	S	13	4,9	G	15	15,0	S	41	25,16	G	16	16,0	S	48	27,21	C	24	1,23	S	52	26,26	G	18	18,0	C	21	0,21	S	30	22,8	C	49	0,49	S	30	19,11	S	36
Marker10010	87.417	Cma_Chr01	5002798	G	A	A	18	1,17	G	13	13,0	R	23	15,8	G	30	30,0	R	7	5,2	G	18	18,0	R	32	8,24	A	14	0,14	R	28	20,8	G	31	31,0	A	20	0,20	R	19	10,9	A	18	0,18	R	24	11,13	R	14
Marker10007	87.417	Cma_Chr01	5002606	C	T	T	13	0,13	C	15	15,0	Y	23	15,8	C	30	30,0	Y	7	5,2	C	18	18,0	Y	32	8,24	T	14	0,14	Y	28	20,8	C	31	31,0	T	20	0,20	Y	19	10,9	T	18	0,18	Y	24	11,13	Y	14
Marker10006	87.417	Cma_Chr01	5002595	C	T	T	13	0,13	C	16	16,0	Y	23	15,8	C	30	30,0	Y	7	5,2	C	18	18,0	Y	32	8,24	T	14	0,14	Y	28	20,8	C	31	31,0	T	20	0,20	Y	19	10,9	T	18	0,18	Y	24	11,13	Y	14
Marker10096	87.417	Cma_Chr01	5009251	T	C	C	16	1,15	T	16	16,0	Y	36	9,27	T	27	27,0	Y	51	16,35	T	41	39,2	Y	62	14,48	C	53	0,53	Y	64	22,42	T	42	42,0	C	83	1,82	Y	32	17,15	C	74	0,74	Y	62	22,40	Y	48
Marker10095	87.417	Cma_Chr01	5009231	G	A	A	18	1,17	G	12	12,0	R	35	9,25	G	27	27,0	R	52	16,36	G	41	39,2	R	63	14,49	A	54	0,54	R	64	22,42	G	42	41,1	A	83	1,81	R	32	17,15	A	74	0,74	R	62	22,40	R	48
Marker10094	87.417	Cma_Chr01	5009214	C	G	G	20	1,19	C	13	13,0	S	35	10,25	C	27	27,0	S	52	16,36	C	41	39,2	S	63	14,49	G	54	0,54	S	64	22,42	C	42	42,0	G	83	1,82	S	32	17,15	G	74	0,73	S	62	22,40	S	48
Marker10093	87.417	Cma_Chr01	5009195	C	T	T	16	1,15	C	13	13,0	Y	35	10,24	C	27	27,0	Y	52	16,36	C	41	38,2	Y	63	14,49	T	54	0,54	Y	64	22,42	C	42	42,0	T	83	1,82	Y	32	17,15	T	74	0,74	Y	62	22,40	Y	48
Marker10836	87.417	Cma_Chr01	5071914	A	T	T	12	0,12	A	10	10,0	W	25	13,12	A	16	16,0	W	23	9,14	A	24	23,1	W	19	15,4	T	22	1,21	W	17	10,7	A	100	100,0	T	21	1,20	W	16	12,4	T	18	0,18	W	17	12,5	W	11
Marker10317	87.917	Cma_Chr01	5024303	G	A	A	21	1,20	G	13	13,0	R	7	3,4	G	8	8,0	R	15	10,5	G	3	3,0	R	6	1,5	A	24	0,24	R	14	7,7	G	15	14,1	A	31	1,30	R	5	2,3	A	10	0,10	R	17	8,9	R	9
Marker10400	87.917	Cma_Chr01	5032213	G	A	A	10	0,10	G	21	21,0	R	19	8,11	G	11	11,0	R	30	9,21	G	13	13,0	R	37	18,19	A	29	1,28	R	69	39,30	G	95	93,2	A	54	0,54	R	35	19,16	A	42	0,42	R	65	20,45	R	34
Marker10895	87.917	Cma_Chr01	5080120	A	G	G	16	0,16	A	20	20,0	R	6	5,1	A	20	20,0	R	41	27,14	A	13	13,0	R	42	27,15	R	20	3,17	R	26	11,15	A	22	22,0	G	29	0,29	R	27	17,10	G	41	0,41	R	45	16,29	R	22
Marker10894	87.917	Cma_Chr01	5080107	A	C	C	21	0,21	A	19	19,0	A	6	5,1	A	20	20,0	M	42	28,14	A	13	13,0	M	42	27,15	M	20	3,17	M	26	11,15	A	22	22,0	C	30	0,30	M	27	17,10	C	40	0,40	M	45	16,29	M	22
Marker10322	87.917	Cma_Chr01	5024587	T	A	A	15	0,15	T	15	15,0	W	7	6,1	T	5	5,0	W	29	17,12	T	15	15,0	W	29	10,19	A	22	0,22	W	18	9,9	T	46	46,0	A	22	0,22	W	8	4,4	A	16	0,16	W	20	12,8	W	16
Marker9854	87.917	Cma_Chr01	4976307	C	T	T	14	0,14	C	18	18,0	Y	19	6,13	C	12	12,0	Y	51	27,24	C	18	17,1	Y	41	17,24	T	47	1,46	Y	50	22,28	C	24	23,1	T	36	0,36	Y	26	7,19	T	36	1,35	Y	67	33,34	Y	34
Marker10524	87.917	Cma_Chr01	5042196	G	A	A	12	0,12	G	16	16,0	R	8	5,3	G	8	8,0	R	12	9,3	G	14	14,0	R	9	5,4	A	18	0,18	R	6	4,2	G	45	44,1	A	9	0,9	R	2	1,1	A	11	0,11	R	19	2,17	R	6
Marker11771	88.422	Cma_Chr01	5664982	C	T	C	19	19,0	T	16	0,16	Y	14	7,7	T	8	0,8	Y	17	5,11	T	14	0,14	Y	26	13,13	C	16	15,1	Y	24	14,10	T	46	0,46	Y	31	13,18	Y	18	4,14	C	30	30,0	Y	13	9,4	Y	16
Marker10898	88.422	Cma_Chr01	5080256	C	A	A	17	0,17	C	21	21,0	C	6	5,1	C	20	20,0	M	42	28,14	C	13	13,0	M	43	28,15	A	26	3,23	M	26	11,15	C	22	22,0	A	29	0,28	M	27	17,10	A	44	0,44	M	45	16,29	M	22
Marker9853	88.422	Cma_Chr01	4976288	G	A	A	12	0,12	G	20	20,0	R	19	6,13	G	12	12,0	R	51	27,24	G	18	17,1	R	41	17,24	A	47	1,46	R	50	22,28	G	24	23,1	A	35	0,35	R	26	7,19	A	36	1,35	R	67	33,34	R	34
Marker10899	88.422	Cma_Chr01	5080300	G	T	T	17	0,17	G	24	24,0	G	6	5,1	G	20	20,0	K	42	28,14	G	13	13,0	K	43	28,15	T	24	1,23	K	26	11,15	G	22	22,0	T	30	0,30	K	27	17,10	T	44	0,44	K	44	14,29	K	22
Marker10320	88.422	Cma_Chr01	5024487	T	C	C	18	0,18	T	17	17,0	Y	7	3,4	T	8	8,0	Y	15	10,5	T	3	3,0	Y	6	1,5	C	25	0,25	Y	14	8,6	T	15	14,1	C	32	2,30	Y	5	2,3	C	10	0,10	Y	17	8,9	Y	9
Marker10525	88.922	Cma_Chr01	5042233	G	T	T	13	0,13	G	14	14,0	K	8	5,3	G	8	8,0	K	12	9,3	G	14	14,0	K	9	5,4	T	17	0,17	K	6	4,2	G	44	44,0	T	9	0,9	K	2	1,1	T	11	0,11	T	17	0,17	K	6
Marker11379	89.422	Cma_Chr01	5594445	G	A	A	17	0,17	G	10	10,0	R	32	16,16	G	9	9,0	R	9	2,7	G	6	6,0	R	31	9,22	A	15	0,15	R	22	9,13	G	6	6,0	A	36	0,36	A	4	0,4	A	18	1,17	R	12	7,5	R	15
Marker11394	90.422	Cma_Chr01	5599786	T	C	T	17	17,0	C	16	0,16	Y	34	13,21	C	33	0,33	Y	66	27,39	C	37	0,37	Y	99	41,58	T	65	64,1	Y	61	27,34	C	27	0,27	T	40	40,0	Y	59	23,36	T	96	96,0	Y	88	41,47	Y	48
Marker11770	90.422	Cma_Chr01	5664965	C	T	C	18	18,0	T	18	0,18	Y	14	7,7	T	8	0,8	Y	17	5,12	T	14	0,14	Y	26	13,13	C	16	15,1	Y	24	14,10	T	46	0,46	Y	31	13,18	Y	18	4,14	C	30	30,0	Y	13	8,4	Y	16
Marker11769	90.422	Cma_Chr01	5664953	T	C	T	17	17,0	C	18	0,18	Y	13	7,6	C	8	0,8	Y	17	5,12	C	14	0,14	Y	26	13,13	T	16	15,1	Y	24	14,10	C	46	1,45	Y	31	13,18	Y	18	4,14	T	30	30,0	Y	13	9,4	Y	16
Marker12005	90.922	Cma_Chr01	5683440	G	C	G	21	20,1	C	20	0,20	S	10	4,6	C	24	0,24	S	81	45,36	C	21	0,21	S	78	43,35	G	44	44,0	S	53	20,32	C	19	0,19	S	51	29,22	S	30	20,10	G	99	96,2	S	62	39,23	S	42
Marker11429	90.922	Cma_Chr01	5608885	T	C	C	13	0,13	T	21	21,0	Y	17	12,5	Y	19	17,2	Y	29	18,11	T	21	21,0	Y	39	15,24	C	11	0,11	Y	45	21,24	T	23	22,1	C	29	0,29	Y	27	7,20	C	12	0,12	Y	23	19,4	Y	23
Marker11428	90.922	Cma_Chr01	5608736	T	C	C	10	0,10	T	20	20,0	Y	16	11,5	Y	19	17,2	Y	29	18,11	T	21	21,0	Y	42	15,27	C	11	0,11	Y	45	21,24	T	23	22,1	C	29	0,29	Y	27	7,20	C	12	0,12	Y	23	19,4	Y	23
Marker11496	90.922	Cma_Chr01	5618846	G	T	T	13	0,13	G	11	11,0	K	10	4,6	N	.	.	K	11	7,4	G	5	5,0	K	15	8,7	T	4	0,4	K	26	13,13	G	6	6,0	T	15	0,15	K	10	6,4	T	13	0,13	K	32	16,16	K	8
Marker11401	90.922	Cma_Chr01	5604621	C	A	A	20	0,20	C	14	14,0	M	21	10,11	C	14	14,0	M	65	33,32	M	21	18,3	M	38	25,13	A	36	0,36	M	61	28,33	C	32	32,0	A	51	0,51	M	21	6,15	A	36	0,36	M	33	14,19	M	18
Marker11400	90.922	Cma_Chr01	5604615	T	C	C	21	0,21	T	16	16,0	Y	21	10,11	T	14	14,0	Y	65	33,32	Y	21	18,3	Y	38	25,13	C	36	0,36	Y	61	28,33	T	32	32,0	C	51	0,51	Y	21	6,15	C	36	0,36	Y	33	14,19	Y	18
Marker12843	91.422	Cma_Chr01	5821586	C	T	C	24	24,0	T	20	0,20	Y	25	12,13	T	5	0,5	Y	16	8,8	T	20	0,20	Y	18	11,7	C	25	25,0	Y	22	13,9	T	25	0,25	Y	15	9,6	Y	26	10,16	C	13	13,0	Y	12	3,9	Y	14
Marker11393	91.422	Cma_Chr01	5599771	G	T	G	15	15,0	T	15	0,15	K	35	14,21	T	33	0,33	K	66	27,39	T	37	0,37	K	99	41,58	G	65	64,1	K	61	27,34	T	27	0,27	G	41	41,0	K	60	24,36	G	96	96,0	K	88	41,47	K	48
Marker11392	91.422	Cma_Chr01	5599739	C	G	C	16	15,1	G	12	0,12	S	35	14,21	G	33	0,33	S	66	27,39	G	37	0,37	S	100	41,59	C	65	64,1	S	61	27,34	G	29	0,29	C	41	41,0	S	60	24,36	C	96	96,0	S	88	41,47	S	48
Marker13712	92.422	Cma_Chr01	5983811	A	G	A	15	14,1	G	20	0,20	R	18	10,8	G	6	0,6	R	8	5,3	G	18	1,17	R	13	5,8	A	8	8,0	R	28	11,17	G	19	0,19	R	21	11,10	R	3	2,1	A	13	13,0	R	15	4,11	R	12
Marker16117	92.422	Cma_Chr01	6523696	A	T	T	12	0,12	A	15	15,0	W	2	1,1	N	.	.	W	31	18,13	A	2	2,0	W	29	8,20	T	23	2,21	W	20	2,18	A	11	11,0	W	23	11,12	W	19	3,16	T	34	2,32	W	41	18,23	W	19
Marker16115	92.422	Cma_Chr01	6523550	A	C	C	12	0,12	A	20	20,0	M	2	1,1	N	.	.	M	31	18,13	A	2	2,0	M	30	9,21	C	23	0,23	M	20	2,18	A	11	11,0	M	23	11,12	M	19	3,16	C	34	2,32	M	40	18,22	M	19
Marker16101	92.422	Cma_Chr01	6522458	C	G	G	13	0,13	C	18	18,0	S	12	8,4	C	15	14,1	S	58	26,32	C	3	3,0	S	22	10,12	G	28	0,28	S	34	13,21	C	22	22,0	S	46	13,32	S	27	8,19	G	36	0,36	S	52	36,16	S	14
Marker16100	92.422	Cma_Chr01	6522403	C	T	T	17	1,16	C	17	17,0	Y	12	8,4	C	15	14,1	Y	58	26,32	C	3	3,0	Y	22	10,12	T	28	0,28	Y	34	13,21	C	22	22,0	Y	46	14,32	Y	27	8,19	T	36	0,36	Y	52	36,16	Y	14
Marker16105	92.422	Cma_Chr01	6522652	A	G	G	16	0,16	A	15	15,0	R	10	8,2	R	12	11,1	R	58	26,32	A	3	3,0	R	22	10,12	G	28	0,28	R	34	13,21	A	22	22,0	R	46	14,32	R	27	8,19	G	36	0,36	R	52	36,16	R	14
Marker16104	92.422	Cma_Chr01	6522633	T	G	G	13	0,13	T	10	10,0	K	10	8,2	K	12	11,1	K	58	26,32	T	3	3,0	K	22	10,12	G	28	0,28	K	34	13,21	T	22	22,0	K	46	14,32	K	27	8,19	G	36	0,36	K	52	36,16	K	14
Marker13040	92.922	Cma_Chr01	5881629	T	C	T	18	17,1	C	16	0,16	Y	12	6,6	C	11	0,11	Y	27	10,17	C	18	0,18	Y	38	26,12	T	23	23,0	Y	20	6,14	C	10	0,10	Y	16	6,10	Y	15	13,2	T	15	15,0	Y	22	11,11	Y	19
Marker13111	92.922	Cma_Chr01	5893710	A	G	A	13	13,0	G	13	0,13	R	10	7,3	G	2	0,2	R	14	12,2	G	1	0,1	R	15	11,4	A	11	11,0	R	14	11,3	G	8	0,8	R	11	8,3	A	8	8,0	A	12	12,0	R	18	2,16	R	24
Marker16529	92.922	Cma_Chr01	6562421	G	T	G	10	10,0	T	15	0,15	K	5	2,3	K	9	1,8	K	25	16,9	T	9	0,9	K	10	4,6	G	14	14,0	K	29	20,9	T	9	0,9	K	25	13,12	T	6	0,6	G	31	31,0	K	34	22,12	K	8
Marker16528	92.922	Cma_Chr01	6562398	G	A	G	10	10,0	A	15	0,15	R	5	2,3	R	9	1,8	R	25	16,9	A	9	0,9	R	10	4,6	G	14	14,0	R	29	20,9	A	9	0,9	R	25	13,12	A	6	0,6	G	31	31,0	R	34	22,12	R	8
Marker13775	93.422	Cma_Chr01	5991886	A	G	A	31	30,1	G	10	0,10	R	31	19,12	G	8	0,8	R	27	14,13	G	26	0,26	R	32	18,14	A	14	14,0	R	37	16,21	G	80	0,80	R	38	24,13	R	14	9,5	A	22	22,0	R	13	11,2	R	11
Marker14415	93.422	Cma_Chr01	6209474	A	G	G	17	1,16	A	13	13,0	R	10	4,6	A	10	10,0	R	7	2,5	A	12	12,0	R	24	10,14	G	8	0,8	R	18	7,11	A	32	30,0	R	11	6,5	R	7	4,3	G	11	0,11	R	12	2,10	R	10
Marker16625	93.422	Cma_Chr01	6572732	C	T	T	14	0,14	C	17	17,0	Y	7	5,2	C	11	11,0	Y	30	11,19	C	14	14,0	Y	39	10,29	T	16	1,15	Y	23	14,9	C	23	23,0	Y	16	4,12	Y	16	13,3	T	23	0,23	Y	41	24,17	Y	24
Marker13134	93.422	Cma_Chr01	5895959	G	A	G	10	10,0	A	16	0,16	R	16	9,7	A	9	0,9	R	21	10,11	A	12	0,12	R	28	8,20	G	19	19,0	R	14	8,6	A	37	0,37	G	4	4,0	R	13	4,9	G	9	9,0	R	20	16,4	R	6
Marker13797	93.422	Cma_Chr01	5995685	T	G	T	28	27,1	G	25	0,25	K	8	2,6	G	7	0,7	K	20	10,10	G	11	0,11	K	14	5,9	T	11	11,0	K	13	6,7	G	21	0,21	K	12	6,6	K	11	6,5	T	17	16,1	K	3	1,2	K	6
Marker12239	93.422	Cma_Chr01	5726579	A	G	G	16	1,15	A	11	11,0	R	23	12,11	A	27	27,0	R	26	20,6	A	31	29,0	R	38	29,9	G	13	0,13	R	31	25,6	A	54	54,0	R	32	25,7	R	12	10,2	G	24	0,24	R	37	29,8	R	14
Marker12238	93.422	Cma_Chr01	5726566	A	C	A	16	15,1	C	10	0,10	M	23	11,12	C	27	0,27	M	26	6,20	C	31	0,31	M	38	10,28	A	13	12,0	M	31	6,25	C	54	0,54	M	32	7,25	M	12	2,10	A	24	24,0	M	38	9,29	M	14
Marker13138	93.422	Cma_Chr01	5896244	C	A	C	18	17,1	A	13	0,13	M	16	9,7	A	10	0,10	M	22	10,12	A	12	0,12	M	29	8,21	C	19	19,0	M	14	8,6	A	35	0,34	C	4	4,0	M	12	4,8	C	9	9,0	M	20	16,4	M	6
Marker13135	93.422	Cma_Chr01	5896010	T	G	T	15	15,0	G	13	0,13	K	16	9,7	G	9	0,9	K	21	10,11	G	12	0,12	K	28	8,20	T	18	18,0	K	14	8,6	G	37	1,35	T	4	4,0	K	13	4,9	T	9	9,0	K	20	16,4	K	6
Marker15381	93.422	Cma_Chr01	6381895	G	A	A	11	0,11	G	20	20,0	N	.	.	G	1	1,0	R	9	4,5	N	.	.	R	10	5,5	A	12	0,12	R	21	13,8	R	6	5,1	R	17	5,12	G	1	1,0	A	10	0,10	R	14	11,3	R	7
Marker15380	93.422	Cma_Chr01	6381735	G	T	T	14	0,14	G	19	19,0	N	.	.	G	1	1,0	K	9	4,5	N	.	.	K	10	5,5	T	12	0,12	K	21	13,8	K	6	5,1	K	17	5,12	G	1	1,0	T	10	0,10	K	14	11,3	K	7
Marker15379	93.422	Cma_Chr01	6381682	T	G	G	14	0,14	T	21	20,1	N	.	.	T	1	1,0	K	8	4,4	N	.	.	K	9	4,5	G	12	0,12	K	21	13,8	K	6	5,1	K	16	5,11	N	.	.	G	10	0,10	K	14	11,3	K	6
Marker13041	93.422	Cma_Chr01	5881642	C	T	C	18	17,1	T	14	0,14	Y	12	6,6	T	11	0,11	Y	27	10,17	T	18	0,18	Y	38	26,12	C	23	23,0	Y	20	6,14	T	10	0,10	Y	16	6,10	Y	15	13,2	C	15	15,0	Y	22	11,11	Y	19
Marker11541	93.927	Cma_Chr01	5642786	C	T	C	20	20,0	T	14	0,14	Y	15	7,8	T	17	1,16	Y	57	21,36	T	13	0,13	Y	54	31,23	C	40	40,0	Y	46	26,20	T	30	0,30	Y	27	11,16	Y	30	20,10	C	69	69,0	Y	61	32,29	Y	26
Marker17064	94.927	Cma_Chr01	6621409	T	C	T	13	13,0	C	15	0,15	Y	6	5,1	C	8	0,8	Y	14	5,9	C	8	0,8	Y	19	8,11	T	20	19,1	Y	58	37,21	C	10	0,10	Y	20	11,9	Y	18	7,11	T	15	15,0	Y	46	24,22	Y	26
Marker11644	95.427	Cma_Chr01	5653165	C	T	C	16	16,0	T	14	0,14	Y	14	6,8	T	12	0,12	Y	19	6,13	T	14	0,14	Y	46	22,24	C	7	7,0	Y	36	17,19	T	15	0,15	Y	39	27,12	Y	9	7,2	C	18	18,0	Y	19	13,6	Y	22
Marker11641	95.427	Cma_Chr01	5652856	G	A	G	13	13,0	A	16	0,16	R	14	6,8	A	12	0,12	R	19	6,13	A	14	0,14	R	46	22,24	G	8	8,0	R	36	17,19	A	15	0,15	R	39	27,12	R	9	7,2	G	18	18,0	R	19	13,6	R	22
Marker16622	96.132	Cma_Chr01	6572581	T	A	A	11	0,11	T	10	10,0	W	7	5,2	T	11	10,0	W	29	10,19	T	14	14,0	W	39	10,29	A	16	1,15	W	23	14,9	T	23	22,0	W	17	5,12	W	18	13,5	A	23	0,23	W	40	23,17	W	24
Marker13886	97.633	Cma_Chr01	6012178	T	C	C	19	0,19	T	22	22,0	Y	34	15,19	T	15	15,0	Y	79	35,44	T	20	20,0	Y	45	17,28	C	35	1,34	Y	52	21,31	T	55	55,0	Y	33	8,25	Y	31	4,27	C	53	0,53	Y	51	30,21	Y	70
Marker13024	98.133	Cma_Chr01	5877742	A	G	A	18	18,0	G	13	0,13	R	13	11,2	G	23	0,23	R	15	7,8	G	28	0,28	R	37	22,15	A	8	8,0	R	22	10,12	G	55	1,54	R	17	13,4	R	8	4,4	A	21	21,0	R	22	12,10	R	18
Marker14336	98.133	Cma_Chr01	6127332	G	T	T	16	0,16	G	10	10,0	K	17	10,7	G	7	7,0	K	35	14,21	G	15	15,0	K	26	15,11	T	23	0,23	K	41	17,24	G	32	32,0	K	44	32,12	K	13	6,7	T	31	0,31	K	23	17,6	K	18
Marker14335	98.133	Cma_Chr01	6127254	C	T	T	20	0,20	C	13	13,0	Y	17	10,7	C	7	7,0	Y	35	14,21	C	19	19,0	Y	28	16,12	T	23	0,23	Y	41	17,24	C	32	32,0	Y	45	33,12	Y	14	6,8	T	30	0,30	Y	26	20,6	Y	21
Marker17016	98.133	Cma_Chr01	6617210	C	G	C	22	22,0	G	20	0,20	S	12	10,2	G	3	0,3	S	18	14,4	G	5	0,5	S	19	11,8	C	10	10,0	S	19	12,7	G	22	0,22	S	21	17,4	S	6	4,2	C	25	25,0	S	14	7,7	S	8
Marker17015	98.133	Cma_Chr01	6617190	C	T	C	21	21,0	T	19	0,19	Y	12	10,2	T	3	0,3	Y	19	15,4	T	5	0,5	Y	19	9,8	C	10	10,0	Y	19	12,7	T	22	0,22	Y	21	17,4	Y	6	4,2	C	25	25,0	Y	14	7,7	Y	8
Marker17014	98.133	Cma_Chr01	6617149	A	G	A	22	22,0	G	15	0,15	R	12	10,2	G	3	0,3	R	19	15,4	G	5	0,5	R	19	11,8	A	10	10,0	R	19	12,7	G	22	0,22	R	21	17,4	R	6	4,2	A	25	25,0	R	14	7,7	R	9
Marker17012	98.133	Cma_Chr01	6617018	C	T	C	21	20,1	T	21	0,21	Y	12	10,2	T	3	0,3	Y	19	15,4	T	5	0,5	Y	19	11,8	C	10	10,0	Y	19	12,7	T	22	0,22	Y	22	17,5	Y	6	4,2	C	25	25,0	Y	14	7,7	Y	9
Marker15425	98.133	Cma_Chr01	6390547	T	G	G	24	2,22	T	21	21,0	K	16	6,10	T	11	11,0	K	38	17,21	T	20	20,0	K	37	21,16	G	24	0,24	K	18	12,6	T	30	30,0	K	44	28,16	K	33	7,26	G	38	0,38	K	61	22,39	K	15
Marker15211	98.133	Cma_Chr01	6364025	T	G	G	17	0,17	T	16	16,0	K	35	29,6	T	25	25,0	K	72	39,33	T	26	25,1	K	84	43,41	G	39	0,39	K	48	25,23	T	49	49,0	K	48	23,25	K	33	22,11	G	49	0,49	K	79	46,33	K	35
Marker12516	98.133	Cma_Chr01	5765219	G	A	G	13	13,0	A	16	0,16	G	8	8,0	A	2	0,2	R	34	24,10	A	2	0,2	R	12	6,6	G	11	11,0	R	22	14,8	A	8	0,8	R	33	29,4	R	13	4,9	G	31	31,0	R	41	12,29	R	18
Marker12515	98.133	Cma_Chr01	5765211	A	G	A	13	13,0	G	18	0,18	A	8	8,0	G	2	0,2	R	34	24,10	G	2	0,2	R	12	6,6	A	11	11,0	R	22	14,8	G	8	0,8	R	33	29,4	R	13	4,9	A	31	31,0	R	41	12,29	R	18
Marker12514	98.133	Cma_Chr01	5765175	T	C	T	12	12,0	C	19	0,19	T	8	8,0	C	2	0,2	Y	34	23,10	C	2	0,2	Y	12	6,6	T	11	11,0	Y	22	14,8	C	8	0,8	Y	33	29,4	Y	13	4,9	T	31	31,0	Y	42	12,30	Y	17
Marker13885	98.133	Cma_Chr01	6012122	C	T	T	20	1,19	C	18	18,0	Y	34	15,19	C	15	15,0	Y	79	35,44	C	19	19,0	Y	45	17,28	T	35	1,34	Y	52	21,31	C	55	55,0	Y	33	8,25	Y	31	4,27	T	53	0,53	Y	51	30,21	Y	70
Marker13215	98.633	Cma_Chr01	5902992	G	T	G	23	22,1	T	18	0,18	K	31	20,11	T	7	0,7	K	37	16,21	T	18	0,18	K	29	16,13	G	19	19,0	K	41	23,18	T	38	0,38	K	47	18,29	K	15	9,6	G	24	24,0	K	34	16,18	K	21
Marker16067	98.633	Cma_Chr01	6519924	A	G	G	15	0,15	A	19	19,0	R	10	5,5	A	4	4,0	R	6	1,5	A	5	5,0	R	9	1,8	G	6	0,6	G	1	0,1	A	2	2,0	R	18	7,11	R	9	6,3	G	13	0,13	R	7	4,3	A	5
Marker15532	98.633	Cma_Chr01	6401127	C	T	T	15	0,15	C	20	20,0	Y	30	15,15	C	26	26,0	Y	70	34,35	C	37	37,0	Y	55	28,27	T	21	0,21	Y	56	25,31	C	35	34,1	Y	65	28,37	Y	28	14,14	T	60	0,60	Y	72	41,30	Y	31
Marker15531	98.633	Cma_Chr01	6400992	T	A	A	21	0,21	T	13	13,0	W	30	15,15	T	26	26,0	W	70	35,35	T	37	37,0	W	55	30,25	A	21	0,21	W	56	25,31	T	37	36,1	W	65	28,37	W	28	14,14	A	60	0,60	W	71	41,30	W	32
Marker15235	98.633	Cma_Chr01	6367461	G	T	T	19	1,18	G	23	23,0	K	26	9,17	G	19	18,1	K	31	12,19	G	27	26,1	K	55	40,15	T	41	1,40	K	30	13,17	G	12	12,0	K	51	26,25	K	24	9,15	T	66	1,65	K	38	18,20	K	27
Marker16077	99.133	Cma_Chr01	6520659	G	A	A	10	0,10	G	22	22,0	R	13	8,5	G	20	20,0	R	24	10,14	R	4	3,1	R	28	18,9	A	10	0,10	R	11	4,7	G	21	21,0	R	20	8,12	R	12	3,9	A	41	1,40	R	36	28,8	R	14
Marker16566	99.133	Cma_Chr01	6566638	C	T	T	15	0,15	C	24	24,0	Y	28	15,13	N	.	.	Y	16	14,2	C	17	17,0	Y	4	3,1	T	5	0,5	Y	36	17,19	C	62	62,0	Y	19	6,13	Y	7	2,5	T	22	0,22	Y	30	9,21	Y	21
Marker16565	99.133	Cma_Chr01	6566593	C	T	T	14	0,14	C	23	23,0	Y	28	15,13	N	.	.	Y	16	14,2	C	17	17,0	Y	4	3,1	T	5	0,5	Y	36	17,19	C	62	62,0	Y	19	6,13	Y	7	2,5	T	22	0,22	Y	30	9,21	Y	21
Marker12361	99.133	Cma_Chr01	5741749	G	T	G	16	15,1	T	19	0,19	K	9	7,2	T	2	0,2	K	10	4,6	T	17	0,17	K	11	6,5	G	7	7,0	T	10	0,10	K	9	1,8	K	12	5,7	K	12	9,3	G	9	9,0	K	17	13,4	K	14
Marker13796	99.133	Cma_Chr01	5995676	T	C	T	26	25,1	C	23	0,23	Y	8	2,6	C	7	0,7	Y	20	10,10	C	11	0,11	Y	14	5,9	T	11	11,0	Y	13	6,7	C	21	0,21	Y	12	6,6	Y	11	6,5	T	17	16,1	Y	3	1,2	Y	6
Marker13795	99.133	Cma_Chr01	5995660	A	T	A	28	26,2	T	24	0,24	W	8	2,6	T	7	0,7	W	20	10,10	T	11	0,11	W	14	5,9	A	11	11,0	W	13	6,7	T	21	0,21	W	12	6,6	W	11	6,5	A	17	16,1	W	3	1,2	W	6
Marker12360	99.133	Cma_Chr01	5741731	T	C	T	18	17,1	C	20	0,20	Y	9	7,2	C	2	0,2	Y	10	4,6	C	17	0,17	Y	11	6,5	T	7	7,0	C	8	0,8	Y	9	1,8	Y	12	5,7	Y	12	9,3	T	9	9,0	Y	17	13,4	Y	14
Marker14119	99.133	Cma_Chr01	6062760	A	G	G	17	0,17	A	15	15,0	R	35	15,20	A	16	16,0	R	57	25,32	A	52	52,0	R	36	21,15	G	36	0,36	R	43	21,22	A	32	32,0	R	71	29,42	R	35	16,19	G	87	0,87	R	47	16,31	R	26
Marker12897	99.133	Cma_Chr01	5830838	G	A	G	16	16,0	A	15	0,15	R	16	10,6	A	11	0,11	R	16	6,10	R	14	3,11	R	14	1,13	G	22	22,0	R	25	13,12	A	35	0,35	R	17	6,11	R	5	2,3	G	20	20,0	R	14	11,3	R	22
Marker14111	99.133	Cma_Chr01	6062037	C	T	T	19	0,19	C	14	14,0	Y	50	28,22	C	22	22,0	Y	73	39,34	C	41	41,0	Y	42	25,17	T	29	0,29	Y	54	30,24	C	50	49,0	Y	56	21,35	Y	29	13,16	T	62	0,62	Y	70	37,32	Y	45
Marker14110	99.133	Cma_Chr01	6062015	A	G	G	18	0,18	A	12	12,0	R	50	28,22	A	22	22,0	R	73	39,34	A	41	41,0	R	41	24,17	G	29	0,29	R	54	30,24	A	50	50,0	R	55	21,34	R	29	13,16	G	62	0,62	R	70	38,32	R	45
Marker12934	99.133	Cma_Chr01	5836338	A	G	A	27	26,1	G	19	0,19	R	6	3,3	G	6	0,6	R	17	12,5	G	11	0,11	R	19	14,5	A	25	25,0	R	13	6,7	G	25	0,25	R	19	12,7	R	5	3,2	A	22	22,0	R	17	9,8	R	14
Marker12933	99.133	Cma_Chr01	5836328	C	T	C	30	29,1	T	20	0,20	Y	6	3,3	T	6	0,6	Y	17	12,5	T	11	0,11	Y	19	14,5	C	25	25,0	Y	13	6,7	T	25	0,25	Y	19	12,7	Y	5	3,2	C	22	22,0	Y	17	9,8	Y	14
Marker15875	99.133	Cma_Chr01	6501826	C	T	T	19	1,18	C	16	16,0	Y	17	8,9	C	13	13,0	Y	97	53,44	C	21	20,1	Y	40	9,30	T	26	1,25	Y	71	36,35	C	28	28,0	Y	52	31,21	Y	35	9,26	T	90	0,90	Y	64	25,39	Y	22
Marker13799	99.133	Cma_Chr01	5996006	C	T	T	18	1,17	C	12	12,0	Y	23	8,15	C	23	23,0	Y	43	17,26	C	37	37,0	Y	74	37,37	T	37	0,37	Y	35	16,19	C	24	23,1	Y	58	20,38	Y	28	6,22	T	92	0,92	Y	14	5,9	Y	30
Marker12882	99.133	Cma_Chr01	5829203	G	C	C	21	1,20	G	24	24,0	S	36	14,22	G	27	27,0	S	146	84,62	G	43	43,0	S	83	42,41	C	58	1,57	S	79	36,42	G	70	69,1	S	101	47,54	S	53	32,21	C	134	0,134	S	107	52,54	S	76
Marker12881	99.133	Cma_Chr01	5829190	C	T	C	17	16,1	T	24	0,24	Y	36	22,14	T	27	0,27	Y	146	62,84	T	43	0,43	Y	82	41,41	C	58	57,1	Y	79	42,37	T	70	1,69	Y	101	54,47	Y	53	21,32	C	134	134,0	Y	104	52,52	Y	75
Marker14309	99.133	Cma_Chr01	6111493	G	A	A	21	2,19	G	12	12,0	R	22	13,8	G	12	12,0	R	39	15,24	G	25	24,1	R	15	13,2	A	25	0,25	R	28	11,17	G	20	19,1	R	50	25,25	R	8	5,3	A	20	0,20	R	29	12,17	R	15
Marker13217	99.133	Cma_Chr01	5903252	A	G	A	22	22,0	G	16	0,16	R	31	20,11	G	7	0,7	R	39	17,22	G	18	0,18	R	29	16,13	A	19	19,0	R	41	23,18	G	35	0,35	R	47	18,29	R	15	9,6	A	24	23,0	R	34	16,18	R	21
Marker13216	99.133	Cma_Chr01	5903030	A	G	A	20	19,1	G	16	0,16	R	31	20,11	G	7	0,7	R	37	16,21	G	18	0,18	R	29	16,13	A	19	19,0	R	41	23,18	G	38	0,38	R	47	18,29	R	15	9,6	A	24	24,0	R	34	16,18	R	21
Marker15422	99.133	Cma_Chr01	6390358	A	G	G	19	1,18	A	25	25,0	R	17	6,11	A	11	11,0	R	38	17,21	A	20	20,0	R	37	22,15	G	25	0,25	R	18	12,6	A	30	30,0	R	44	28,16	R	34	8,26	G	39	0,39	R	61	22,39	R	16
Marker13554	99.838	Cma_Chr01	5954282	G	A	A	17	0,17	G	19	19,0	R	7	3,4	G	5	5,0	R	9	6,3	G	3	3,0	R	24	15,9	R	12	1,11	A	11	0,11	G	10	10,0	R	15	8,7	A	2	0,2	R	13	5,8	R	19	11,8	R	10
Marker12862	99.838	Cma_Chr01	5826519	A	T	A	20	20,0	T	17	0,17	W	5	2,3	T	10	0,10	W	22	13,9	T	12	0,12	W	20	10,10	A	30	30,0	W	11	6,5	T	30	0,30	W	6	3,3	W	10	7,3	A	28	28,0	W	27	15,12	W	7
Marker12863	99.838	Cma_Chr01	5826581	G	A	A	16	0,16	G	14	14,0	R	5	3,2	G	10	10,0	R	22	9,13	G	12	12,0	R	20	10,10	A	30	0,30	R	11	5,6	G	30	30,0	R	6	3,3	R	10	3,7	A	28	0,28	R	27	11,15	R	7
Marker13553	99.838	Cma_Chr01	5954246	C	T	T	19	0,19	C	16	16,0	Y	7	3,4	C	5	5,0	Y	9	6,3	C	3	3,0	Y	24	15,9	Y	12	1,11	T	11	0,11	C	10	10,0	Y	15	8,7	T	2	0,2	Y	13	5,8	Y	19	11,8	Y	10
Marker16694	100.838	Cma_Chr01	6578853	C	T	T	18	1,17	C	16	16,0	Y	16	6,10	C	12	12,0	Y	27	16,11	C	10	9,0	Y	24	19,5	T	18	0,18	Y	33	10,23	C	39	39,0	Y	21	5,16	Y	8	5,3	T	19	0,19	Y	23	15,8	Y	5
Marker16693	100.838	Cma_Chr01	6578819	T	C	C	17	1,16	T	17	17,0	Y	16	6,10	T	12	12,0	Y	27	16,11	T	10	10,0	Y	24	19,5	C	18	0,18	Y	33	10,23	T	39	39,0	Y	21	5,16	Y	8	5,3	C	19	0,19	Y	23	15,8	Y	5
Marker16688	100.838	Cma_Chr01	6578630	A	T	T	18	0,18	A	23	23,0	W	16	6,10	A	12	12,0	W	27	16,10	A	10	10,0	W	24	19,5	T	18	0,18	W	33	10,23	A	39	39,0	W	22	5,17	W	8	5,3	T	19	0,19	W	23	15,8	W	5
Marker16686	100.838	Cma_Chr01	6578554	C	T	T	20	0,20	C	18	18,0	Y	16	6,10	C	12	12,0	Y	26	15,11	C	10	10,0	Y	24	19,5	T	18	0,18	Y	33	10,23	C	39	39,0	Y	22	5,17	Y	8	5,3	T	19	0,19	Y	23	15,8	Y	4
Marker16687	100.838	Cma_Chr01	6578614	C	T	C	19	19,0	T	21	0,21	Y	16	10,6	T	12	0,12	Y	27	11,15	T	10	0,10	Y	24	5,19	C	18	18,0	Y	33	23,10	T	39	0,39	Y	22	17,5	Y	8	3,5	C	19	19,0	Y	23	8,15	Y	5
Marker16797	101.338	Cma_Chr01	6591723	C	T	C	17	17,0	T	15	0,15	Y	7	2,5	T	11	0,11	Y	36	22,14	T	21	0,21	Y	42	35,7	C	10	10,0	Y	45	24,21	T	29	0,29	Y	45	24,21	Y	16	11,5	C	41	41,0	C	19	17,2	C	15
Marker16796	101.838	Cma_Chr01	6591715	C	T	C	18	18,0	T	16	0,16	Y	7	2,5	T	11	0,11	Y	36	22,14	T	21	0,21	Y	42	35,7	C	10	10,0	Y	45	24,21	T	29	0,29	Y	45	24,21	Y	16	11,5	C	41	41,0	Y	19	17,2	C	15
Marker16799	101.838	Cma_Chr01	6591898	A	T	A	21	21,0	T	20	0,20	W	7	2,5	T	11	0,11	W	37	23,14	T	21	0,21	W	42	35,7	A	10	10,0	W	45	24,21	T	29	0,29	W	45	24,21	W	16	11,5	A	41	41,0	W	19	17,2	A	15
Marker13552	102.338	Cma_Chr01	5954226	G	A	A	18	0,18	G	15	15,0	R	7	3,4	G	5	5,0	R	9	6,3	G	3	3,0	R	24	15,9	R	12	1,11	A	11	0,11	G	10	10,0	R	15	8,7	A	2	0,2	R	13	5,8	R	19	11,8	R	10
Marker12812	102.838	Cma_Chr01	5811495	C	T	T	13	0,13	C	12	12,0	Y	15	8,7	C	15	15,0	Y	7	4,3	C	13	13,0	Y	2	1,1	T	9	0,9	Y	18	11,7	C	10	10,0	Y	23	7,16	Y	4	1,3	T	21	0,21	Y	17	8,9	Y	5
Marker14636	102.838	Cma_Chr01	6302241	A	G	G	10	0,10	A	12	12,0	R	7	1,6	A	10	10,0	R	23	13,10	A	12	12,0	R	21	9,12	G	22	0,22	R	27	11,16	A	23	23,0	R	33	15,18	R	11	5,6	G	21	0,21	R	20	6,14	R	21
Marker16828	102.838	Cma_Chr01	6593898	G	T	G	23	23,0	T	23	0,23	K	14	8,6	T	16	0,16	K	36	27,9	T	10	0,10	K	35	16,19	G	15	15,0	K	27	15,12	T	10	0,10	K	34	10,24	K	10	2,8	G	32	32,0	K	30	22,8	K	21
Marker16827	102.838	Cma_Chr01	6593890	A	G	A	24	24,0	G	24	0,24	R	14	8,6	G	16	0,16	R	36	27,9	G	10	0,10	R	35	16,19	A	15	15,0	R	27	15,12	G	10	0,10	R	34	10,24	R	10	2,8	A	32	32,0	R	30	22,8	R	21
Marker16826	102.838	Cma_Chr01	6593815	T	G	T	16	15,1	G	19	0,19	K	14	8,6	G	16	0,16	K	36	27,9	G	10	0,10	K	35	16,19	T	15	15,0	K	27	15,12	G	10	0,10	K	34	10,24	K	10	2,8	T	32	32,0	K	30	22,8	K	21
Marker14813	102.838	Cma_Chr01	6321124	A	G	G	22	1,21	A	22	22,0	G	2	0,2	A	6	6,0	R	10	6,4	A	10	10,0	R	19	3,16	G	4	0,4	A	1	1,0	A	11	11,0	R	20	17,3	R	6	3,3	G	13	0,13	N	.	.	N	.
Marker14812	102.838	Cma_Chr01	6321082	T	G	G	24	1,23	T	19	19,0	G	2	0,2	T	6	6,0	K	10	6,4	T	10	10,0	K	19	3,16	G	4	0,4	T	1	1,0	T	11	11,0	K	20	17,3	K	6	3,3	G	13	0,13	N	.	.	N	.
Marker14266	102.838	Cma_Chr01	6080509	G	T	T	18	1,17	G	17	17,0	K	33	24,9	G	24	24,0	K	56	34,22	G	21	21,0	K	30	21,9	T	14	0,14	K	26	20,6	G	31	31,0	K	45	27,18	K	14	9,5	T	36	0,36	K	44	22,22	K	18
Marker14265	102.838	Cma_Chr01	6080427	G	A	A	18	0,18	G	19	19,0	R	33	24,9	G	24	24,0	R	56	34,22	G	21	21,0	R	30	21,9	A	14	0,14	R	26	20,6	G	31	31,0	R	45	28,17	R	14	9,5	A	36	0,36	R	44	22,22	R	20
Marker16795	102.838	Cma_Chr01	6591691	A	G	A	19	19,0	G	18	0,18	R	7	2,5	G	11	0,11	R	36	22,14	G	21	0,21	R	42	35,7	A	10	10,0	R	45	24,21	G	29	0,29	R	45	24,21	R	16	11,5	A	41	41,0	R	19	17,2	A	15
Marker15074	102.838	Cma_Chr01	6348938	C	T	T	17	1,16	C	19	19,0	T	4	0,4	C	16	16,0	Y	18	10,8	C	4	4,0	T	10	0,10	T	18	1,17	Y	22	11,11	C	43	43,0	Y	16	7,9	Y	8	2,6	T	42	2,40	Y	19	5,14	Y	16
Marker15745	102.838	Cma_Chr01	6486225	A	G	G	12	0,12	A	15	15,0	R	10	6,4	A	5	5,0	R	25	20,5	A	21	21,0	R	21	9,12	G	16	0,16	R	18	5,13	A	10	10,0	R	10	4,6	R	17	6,11	G	29	0,29	R	12	8,4	R	14
Marker16076	103.338	Cma_Chr01	6520651	A	G	G	11	0,11	A	18	18,0	R	13	8,5	A	20	20,0	R	24	10,14	R	4	3,1	R	28	19,9	G	10	0,10	R	11	4,7	A	21	21,0	R	20	8,12	R	12	3,9	G	41	1,39	R	36	28,8	R	14
Marker16072	103.338	Cma_Chr01	6520510	A	G	G	15	0,15	A	21	21,0	R	13	8,5	A	20	20,0	R	24	10,14	R	4	3,1	R	29	20,9	G	10	0,10	R	11	4,7	A	21	21,0	R	20	8,12	R	12	4,8	G	42	1,41	R	36	28,8	R	17
Marker11407	104.043	Cma_Chr01	5605399	T	C	C	16	0,16	T	17	17,0	Y	25	13,12	T	13	13,0	Y	32	19,13	T	46	46,0	Y	78	45,33	C	6	0,6	Y	56	31,25	T	19	19,0	C	42	0,42	C	1	0,1	C	57	0,57	Y	34	19,15	Y	15
Marker12437	104.043	Cma_Chr01	5752564	T	C	T	17	17,0	C	18	0,18	Y	32	12,20	C	35	0,35	Y	106	62,44	C	46	2,44	Y	70	46,24	T	35	35,0	Y	90	43,47	C	51	1,50	Y	95	55,40	Y	47	40,7	T	75	75,0	Y	90	50,40	Y	50
Marker11409	104.043	Cma_Chr01	5605566	T	C	C	11	0,11	T	17	17,0	Y	27	13,14	T	13	13,0	Y	37	24,13	T	48	48,0	Y	82	48,34	C	6	0,6	Y	57	31,26	T	21	21,0	C	44	0,44	T	1	1,0	C	58	0,58	Y	37	20,17	Y	16
Marker15781	104.543	Cma_Chr01	6491002	T	G	G	14	0,14	T	28	28,0	K	7	1,6	T	7	7,0	K	13	6,7	T	7	7,0	K	20	14,6	G	7	0,7	K	7	4,3	T	9	8,1	G	3	0,3	K	7	4,2	G	3	0,3	T	2	2,0	K	5
Marker15782	104.543	Cma_Chr01	6491050	C	T	T	14	0,14	C	23	23,0	Y	7	1,6	C	7	7,0	Y	13	6,7	C	7	7,0	Y	20	14,6	T	7	0,7	Y	7	4,3	C	9	9,0	T	3	0,3	Y	7	5,2	T	3	0,3	C	2	2,0	Y	5
Marker15777	106.044	Cma_Chr01	6490834	A	G	G	19	0,19	A	19	19,0	R	7	1,6	A	6	6,0	R	13	6,7	A	7	7,0	R	20	14,6	G	7	0,7	R	7	4,3	A	9	8,0	G	3	0,3	R	7	5,2	G	3	0,3	A	2	2,0	R	5
Marker17953	106.749	Cma_Chr01	8029490	G	A	A	15	0,15	G	13	13,0	R	29	17,12	G	14	14,0	G	55	55,0	R	41	14,27	R	66	28,38	R	40	26,14	R	53	25,28	R	21	16,5	R	60	30,30	R	12	9,3	A	71	0,71	G	69	69,0	R	26
Marker17952	107.249	Cma_Chr01	8029435	C	T	T	21	1,20	C	15	15,0	Y	29	17,12	C	14	14,0	C	55	55,0	Y	42	14,28	Y	66	28,38	Y	40	26,14	Y	53	25,28	Y	24	18,6	Y	60	30,30	Y	12	9,3	T	71	0,71	C	69	69,0	Y	26
Marker17955	117.72	Cma_Chr01	8029626	G	A	A	10	0,10	G	14	14,0	R	29	17,11	G	14	14,0	G	55	55,0	R	42	14,28	R	66	28,38	R	40	26,13	R	53	25,28	R	22	16,6	R	60	30,30	R	12	9,3	A	71	0,71	G	69	69,0	R	26
Marker18117	118.925	Cma_Chr01	8075123	C	A	A	19	1,18	C	12	12,0	M	20	7,12	C	29	29,0	C	92	89,3	M	37	17,20	M	67	36,31	M	64	40,24	M	61	36,25	M	39	14,25	M	68	46,22	M	32	16,16	A	125	0,125	C	115	113,2	M	42
Marker18234	119.425	Cma_Chr01	8137123	G	A	G	10	10,0	A	19	0,19	R	42	25,16	A	40	2,38	A	71	0,71	R	40	10,30	R	89	55,34	R	57	23,34	R	45	18,27	R	53	30,23	R	90	36,53	R	49	31,18	G	131	131,0	A	72	0,72	R	65
Marker18139	119.925	Cma_Chr01	8080036	A	G	A	13	13,0	G	24	0,24	R	20	8,12	R	9	2,7	G	49	1,48	R	27	14,13	R	28	16,12	R	29	18,11	R	30	13,17	R	36	15,21	R	50	33,17	R	12	5,7	A	46	46,0	G	69	1,68	R	25
Marker18233	120.425	Cma_Chr01	8137114	C	T	C	10	10,0	T	19	0,19	Y	42	25,17	T	40	2,38	T	71	0,71	Y	40	10,30	Y	89	55,34	Y	57	23,34	Y	45	18,27	Y	53	30,23	Y	90	36,54	Y	49	31,18	C	131	131,0	T	72	0,72	Y	65
Marker18537	120.925	Cma_Chr01	8187101	A	T	T	18	0,18	A	14	14,0	W	9	1,8	A	11	11,0	A	10	9,0	W	10	2,8	W	12	3,9	W	13	5,8	W	27	13,14	W	20	12,8	W	14	5,9	W	6	1,5	T	5	0,5	A	17	17,0	W	7
Marker18263	120.925	Cma_Chr01	8145511	G	A	G	10	10,0	A	25	0,25	R	39	17,22	A	30	0,30	A	75	0,75	R	34	17,17	R	56	23,33	R	47	24,23	R	43	27,16	R	47	30,17	R	62	36,26	R	36	22,14	G	97	95,2	A	43	1,42	R	41
Marker19168	121.425	Cma_Chr01	8399477	C	A	A	12	0,12	C	12	12,0	M	3	1,2	C	10	10,0	C	21	21,0	M	15	4,11	M	36	16,20	M	14	5,9	M	14	9,5	M	18	8,10	M	22	15,7	A	2	0,2	A	24	0,24	C	26	26,0	C	18
Marker19355	122.425	Cma_Chr01	8434323	A	G	G	10	0,10	A	16	16,0	R	8	3,5	A	7	7,0	A	23	22,1	R	12	6,6	R	20	11,9	R	13	11,2	A	34	34,0	R	26	10,16	R	37	20,17	R	4	1,3	G	19	0,19	A	34	34,0	R	27
Marker19702	123.425	Cma_Chr01	8734574	G	A	A	16	0,16	G	20	20,0	R	18	4,14	G	9	9,0	R	27	14,13	R	31	13,18	R	18	11,7	R	26	16,10	G	36	36,0	R	35	15,20	G	30	30,0	R	11	3,8	A	30	0,30	G	33	33,0	R	25
Marker19316	124.926	Cma_Chr01	8424667	G	A	A	20	1,19	G	22	22,0	R	27	20,7	G	10	10,0	G	35	35,0	R	20	8,12	R	25	14,11	R	13	5,8	G	43	41,2	R	19	9,10	R	29	16,13	R	21	15,6	A	33	1,32	G	41	41,0	R	16
Marker19657	126.426	Cma_Chr01	8694889	C	T	T	14	0,14	C	12	12,0	Y	35	17,18	C	17	17,0	Y	53	27,26	Y	28	10,18	Y	30	17,13	Y	33	14,19	C	46	46,0	Y	18	12,6	C	53	53,0	Y	25	10,15	T	46	1,43	C	37	37,0	T	24
Marker19706	126.926	Cma_Chr01	8753809	C	T	T	14	0,14	C	21	21,0	Y	12	7,5	C	14	14,0	Y	18	8,10	Y	22	14,8	Y	19	7,12	Y	21	13,8	C	44	44,0	Y	50	21,29	C	48	47,1	Y	15	13,2	T	21	0,21	C	33	33,0	T	15
Marker19703	127.426	Cma_Chr01	8744571	G	A	A	11	0,11	G	12	12,0	R	18	13,5	G	20	20,0	R	27	8,19	R	23	12,11	R	14	10,4	R	9	5,4	G	30	30,0	R	30	15,15	G	38	38,0	R	10	6,4	A	32	0,32	G	34	34,0	A	8
Marker20918	127.926	Cma_Chr01	9341615	T	C	T	15	14,1	C	22	0,22	C	14	0,14	C	5	0,5	Y	33	17,16	Y	16	8,8	Y	17	9,8	Y	20	13,7	C	25	1,24	Y	25	4,21	C	22	0,22	Y	9	3,6	Y	16	9,7	C	10	0,10	T	20
Marker19870	128.426	Cma_Chr01	8796788	C	G	C	15	14,1	G	23	0,23	S	27	7,20	G	35	0,35	S	32	9,23	S	14	5,9	S	52	23,29	S	26	18,8	G	26	0,26	S	12	8,4	G	41	0,41	S	14	8,6	C	35	35,0	G	79	1,78	C	15
Marker19779	129.927	Cma_Chr01	8783428	A	G	G	18	1,17	A	13	13,0	R	7	2,5	A	9	9,0	R	9	1,8	R	10	3,7	R	15	11,4	R	10	6,4	A	12	12,0	R	20	9,11	A	10	10,0	R	5	3,2	G	12	0,12	A	10	10,0	G	6
Marker21095	131.427	Cma_Chr01	9457316	C	A	C	12	12,0	A	19	0,19	A	18	0,18	A	10	0,10	M	38	14,24	M	20	14,6	M	25	11,14	M	16	9,7	A	31	0,31	M	18	12,6	A	41	0,41	M	20	9,11	M	27	14,13	A	42	0,42	C	23
Marker20812	135.537	Cma_Chr01	9304115	A	G	A	17	16,1	G	19	1,18	G	18	0,18	G	10	0,10	R	14	3,11	R	16	10,6	R	11	9,2	R	6	1,5	G	22	0,22	R	27	10,17	G	27	0,27	R	6	2,4	R	19	10,9	G	34	0,34	A	8
Marker21156	136.247	Cma_Chr01	9485102	G	A	G	17	15,2	A	25	0,25	A	11	0,11	A	2	0,2	R	15	13,2	R	5	3,2	R	14	1,13	R	7	2,5	A	23	0,23	R	13	4,9	A	28	0,28	R	4	1,3	R	7	3,4	A	28	1,27	G	13
Marker21403	138.458	Cma_Chr01	9752606	G	A	A	13	0,13	G	14	14,0	G	25	25,0	G	19	19,0	R	31	21,10	R	29	12,17	R	31	17,14	R	11	3,8	G	18	17,0	R	18	9,9	G	22	22,0	R	10	4,6	R	31	16,15	G	27	27,0	A	17
Marker21402	139.664	Cma_Chr01	9752597	T	C	C	12	0,12	T	15	15,0	T	25	25,0	T	19	19,0	Y	31	21,10	Y	29	12,17	Y	31	17,14	Y	11	3,8	T	18	18,0	Y	18	9,9	T	22	22,0	Y	10	4,6	Y	31	16,15	T	27	27,0	C	17
Marker21818	144.196	Cma_Chr01	9910332	G	T	T	23	1,22	G	20	20,0	G	12	12,0	G	20	20,0	K	38	20,18	K	32	14,18	K	56	42,14	K	23	16,7	G	40	40,0	K	57	28,29	K	43	23,19	K	21	10,11	K	33	27,6	G	35	35,0	K	21
Marker22501	146.699	Cma_Chr01	10068517	T	G	G	15	0,15	T	12	12,0	T	16	16,0	T	5	5,0	K	32	19,13	K	17	2,15	K	19	8,11	K	15	4,11	T	20	19,1	K	20	3,17	K	20	4,16	K	5	1,4	T	18	18,0	T	24	23,0	G	21
Marker22499	148.199	Cma_Chr01	10068177	T	A	A	16	0,16	T	18	18,0	T	16	16,0	T	5	5,0	W	32	19,13	W	17	2,15	W	19	8,11	W	15	4,11	T	20	19,1	W	20	3,17	W	20	4,16	W	5	1,4	T	18	18,0	T	24	24,0	A	22
Marker23449	149.199	Cma_Chr01	10320165	A	C	A	18	17,1	C	22	0,22	C	9	0,9	C	13	0,13	M	29	7,22	M	15	8,7	M	14	6,8	M	21	10,11	C	18	0,18	M	39	18,21	M	41	20,21	M	11	9,2	C	23	0,23	M	29	15,14	M	6
Marker23466	150.199	Cma_Chr01	10327730	T	C	C	11	0,11	T	12	12,0	Y	11	10,1	T	18	18,0	Y	29	17,12	Y	9	3,6	Y	12	9,3	Y	13	7,6	T	26	26,0	Y	11	3,8	Y	28	10,18	Y	10	8,2	T	22	22,0	Y	19	10,9	Y	18
Marker23261	151.7	Cma_Chr01	10218990	G	C	C	16	1,15	G	17	17,0	G	44	44,0	G	27	27,0	S	79	46,33	S	41	12,29	S	40	23,17	S	42	18,24	G	52	52,0	S	14	4,10	S	72	36,36	S	32	17,15	G	104	104,0	G	69	68,1	S	47
Marker23526	152.7	Cma_Chr01	10343919	G	A	G	14	14,0	A	18	0,18	A	15	0,15	R	8	1,7	R	66	36,30	R	15	10,5	R	39	22,17	R	14	8,6	A	55	0,55	R	95	52,43	R	57	19,38	R	8	1,7	A	34	0,34	R	26	16,10	R	16
Marker23618	152.7	Cma_Chr01	10367791	A	G	A	20	19,1	G	29	0,29	G	6	0,6	G	9	0,9	R	25	12,13	R	20	9,11	R	16	8,8	R	16	11,5	G	19	1,18	R	22	16,6	R	45	21,24	R	10	8,2	G	23	0,23	R	21	12,9	R	12
Marker23376	152.7	Cma_Chr01	10307556	C	T	C	12	12,0	T	14	0,14	Y	16	4,12	Y	2	1,1	Y	55	28,27	T	3	0,3	Y	24	10,14	Y	23	8,15	T	29	2,27	Y	14	10,4	Y	33	17,16	Y	29	16,12	T	66	0,66	Y	58	31,27	Y	14
Marker23527	153.7	Cma_Chr01	10343947	A	C	A	17	17,0	C	23	0,23	C	15	0,15	M	8	1,7	M	66	36,30	M	15	10,5	M	39	22,17	M	14	8,6	C	55	0,55	M	95	52,43	M	57	19,38	M	8	1,7	C	34	0,34	M	26	16,10	M	16
Marker23329	153.7	Cma_Chr01	10280270	G	A	G	12	12,0	A	17	0,17	A	19	0,19	A	8	0,8	R	21	5,16	A	9	0,9	R	17	11,6	R	13	8,5	A	25	0,25	R	20	4,16	R	32	11,21	R	4	2,2	A	24	0,24	R	29	19,10	R	10
Marker24121	154.2	Cma_Chr01	10620093	A	G	G	21	0,21	A	16	16,0	A	25	25,0	A	20	20,0	R	41	20,21	R	41	19,22	R	27	16,11	R	18	4,14	A	61	61,0	R	29	11,18	R	40	22,18	R	3	2,1	A	33	33,0	R	22	15,7	R	24
Marker23525	155.2	Cma_Chr01	10343894	G	T	G	19	19,0	T	19	1,18	T	15	0,15	K	8	1,7	K	65	35,30	K	15	10,5	K	39	22,17	K	14	8,6	T	55	0,55	K	94	52,42	K	57	19,38	K	8	1,7	T	34	0,34	K	26	16,10	K	16
Marker23935	156.2	Cma_Chr01	10460220	A	G	A	20	20,0	G	17	0,17	G	5	0,5	G	5	0,5	R	6	2,4	R	4	3,1	R	22	7,15	R	2	1,1	G	7	0,7	R	9	5,4	R	18	9,9	R	3	2,1	G	6	0,6	R	9	5,4	G	2
Marker23934	157.2	Cma_Chr01	10460159	G	T	G	22	22,0	T	11	0,11	T	5	0,5	T	5	0,5	K	6	2,4	K	4	3,1	K	22	7,15	K	2	1,1	T	7	0,7	K	9	5,4	K	18	9,9	K	3	2,1	T	6	0,6	K	9	5,4	T	2
Marker24593	157.7	Cma_Chr01	10714240	T	C	C	11	0,11	T	14	14,0	T	7	7,0	T	5	5,0	Y	12	8,4	Y	8	1,7	Y	16	11,5	T	1	1,0	T	29	28,1	Y	15	6,9	Y	17	11,6	C	7	0,7	T	20	19,1	Y	24	6,18	Y	8
Marker24151	158.2	Cma_Chr01	10625456	T	G	T	22	22,0	G	17	0,17	G	4	0,4	G	7	0,7	K	31	17,14	K	4	2,2	K	22	12,10	K	20	14,6	G	7	0,7	K	17	3,14	K	21	14,7	T	17	16,1	G	17	0,17	K	10	2,8	K	12
Marker24591	158.7	Cma_Chr01	10714028	T	A	T	12	12,0	A	21	0,21	A	7	0,7	A	5	0,5	W	12	4,8	W	8	7,1	W	16	5,11	A	1	0,1	A	29	1,28	W	15	9,6	W	17	6,11	T	7	7,0	A	20	0,20	W	24	18,6	W	7
Marker24096	158.7	Cma_Chr01	10614081	A	G	G	21	1,20	A	19	19,0	A	1	1,0	N	.	.	R	5	1,4	R	10	4,6	G	5	0,5	R	7	3,4	G	1	0,1	R	5	3,2	R	12	5,7	N	.	.	A	5	5,0	G	6	0,6	G	6
Marker24150	158.7	Cma_Chr01	10625309	G	A	G	20	19,1	A	19	0,19	A	4	0,4	A	7	0,7	R	26	16,10	R	5	2,3	R	22	12,10	R	20	14,6	A	7	0,7	R	15	3,12	R	21	14,7	G	17	16,1	A	16	0,16	A	7	1,6	R	13
Marker24149	158.7	Cma_Chr01	10625294	A	T	A	21	20,1	T	18	0,18	T	4	0,4	T	7	0,7	W	26	16,10	W	5	2,3	W	22	12,10	W	20	14,6	T	7	0,7	W	15	3,12	W	21	14,7	A	17	16,1	T	17	0,17	W	7	1,6	W	13
Marker24152	158.7	Cma_Chr01	10625493	A	G	A	21	21,0	G	16	0,16	G	4	0,4	G	7	0,7	R	31	17,14	R	4	2,2	R	22	12,10	R	20	14,6	G	7	0,7	R	17	3,14	R	21	14,7	A	17	16,1	G	17	0,17	R	10	2,8	R	12
Marker24820	159.2	Cma_Chr01	10762035	T	C	C	14	0,14	T	12	12,0	T	7	7,0	T	15	15,0	Y	30	15,15	Y	13	8,5	Y	21	15,6	C	7	0,7	Y	16	13,3	Y	17	6,11	Y	21	10,11	Y	12	5,7	T	17	17,0	Y	43	9,34	Y	4
Marker24699	159.2	Cma_Chr01	10739827	C	T	C	12	12,0	T	22	0,22	T	11	0,11	T	7	0,7	Y	24	9,15	Y	15	4,11	Y	22	18,4	Y	19	7,12	T	24	0,24	Y	7	3,4	Y	27	15,12	Y	4	1,3	T	34	1,33	Y	46	24,22	Y	20
Marker24567	159.2	Cma_Chr01	10704385	G	T	T	17	1,16	G	15	15,0	G	7	7,0	G	3	3,0	T	13	0,13	K	18	2,16	K	18	4,14	K	17	8,9	G	5	5,0	K	11	6,5	T	17	1,16	K	11	5,6	N	.	.	T	13	0,13	K	13
Marker24566	159.2	Cma_Chr01	10704377	G	A	G	17	16,1	A	16	0,16	A	7	0,7	A	3	0,3	G	13	13,0	R	18	16,2	R	18	14,4	R	17	9,8	A	5	0,5	R	11	5,6	G	17	16,1	R	11	6,5	N	.	.	G	13	13,0	R	13
Marker24094	159.701	Cma_Chr01	10613819	T	C	T	18	17,1	C	18	0,18	C	7	0,7	C	15	0,15	Y	17	9,8	Y	15	4,11	Y	13	1,12	Y	13	2,11	C	25	0,25	Y	47	13,34	Y	34	11,23	Y	9	4,5	C	11	0,11	Y	9	2,7	Y	19
Marker24914	160.201	Cma_Chr01	10784174	C	T	T	18	1,17	C	16	16,0	C	45	45,0	C	29	29,0	Y	66	17,49	Y	30	11,19	Y	68	23,45	Y	30	12,18	C	55	55,0	Y	26	7,19	Y	73	34,39	Y	21	9,12	C	97	97,0	Y	58	30,27	Y	15
Marker24406	160.201	Cma_Chr01	10675774	G	T	T	20	0,20	G	19	19,0	G	26	26,0	G	19	19,0	K	95	43,52	K	22	5,17	K	56	44,12	K	58	30,28	G	69	69,0	K	31	16,15	K	61	29,32	K	16	9,7	G	87	87,0	K	94	50,44	K	45
Marker24349	160.201	Cma_Chr01	10658008	G	A	A	21	1,20	G	14	14,0	G	32	31,1	G	28	28,0	R	60	32,28	R	32	21,11	R	38	28,10	R	24	13,11	G	69	67,2	R	32	13,19	R	48	16,32	R	48	32,15	G	38	38,0	R	40	12,27	R	36
Marker24697	160.201	Cma_Chr01	10739583	C	T	C	10	10,0	T	18	0,18	T	11	0,11	T	7	0,7	Y	24	9,15	Y	15	4,11	Y	23	18,5	Y	19	7,12	T	24	0,24	Y	7	3,4	Y	27	15,12	Y	4	1,3	T	33	0,33	Y	46	24,22	Y	20
Marker25117	160.701	Cma_Chr01	10866545	A	G	G	19	0,19	A	16	16,0	A	26	26,0	A	10	10,0	R	24	8,16	R	34	14,20	R	25	20,5	R	25	9,16	A	16	15,1	R	22	15,7	R	31	19,12	R	14	5,9	A	23	22,1	R	28	10,18	R	15
Marker24819	160.701	Cma_Chr01	10762009	G	A	G	16	15,1	A	14	0,14	A	7	0,7	A	15	0,15	R	30	15,15	R	13	5,8	R	21	6,15	G	7	7,0	R	16	3,13	R	17	11,6	R	21	11,10	R	12	7,5	A	17	0,17	R	43	34,9	R	4
Marker24880	160.701	Cma_Chr01	10775497	C	A	A	10	0,10	C	14	14,0	C	17	16,1	C	5	5,0	M	21	13,8	M	8	3,5	M	14	2,12	M	10	6,4	C	28	28,0	M	21	7,14	M	20	11,9	M	8	4,4	C	17	17,0	M	13	7,6	M	7
Marker24840	160.701	Cma_Chr01	10767082	T	A	T	21	20,1	A	15	0,15	A	18	0,18	A	16	1,15	W	34	14,20	W	19	10,9	W	41	26,15	W	18	8,10	A	37	0,37	W	29	16,13	W	26	16,10	W	24	7,17	A	31	0,31	W	32	9,23	W	19
Marker24839	160.701	Cma_Chr01	10767045	T	A	T	21	20,1	A	17	0,17	A	17	0,17	A	16	1,15	W	34	14,20	W	19	10,9	W	41	26,15	W	18	8,10	A	37	0,37	W	29	16,13	W	26	16,10	W	24	7,17	A	30	0,29	W	32	9,23	W	19
Marker25138	161.201	Cma_Chr01	10872273	A	G	G	14	0,14	A	14	14,0	A	41	41,0	A	27	27,0	R	37	23,14	R	35	19,16	R	33	17,16	R	36	8,28	A	38	38,0	R	27	12,15	R	38	24,14	R	21	16,5	A	43	43,0	R	43	17,26	R	31
Marker25317	162.201	Cma_Chr01	10933858	T	C	C	14	1,13	T	13	13,0	T	5	4,1	T	3	3,0	Y	23	11,12	Y	6	1,5	Y	9	3,6	Y	10	6,4	Y	7	2,5	Y	11	5,6	Y	12	2,10	Y	6	5,1	T	11	11,0	Y	13	8,5	T	1
Marker25116	162.201	Cma_Chr01	10866414	A	T	T	17	0,17	A	15	15,0	A	25	25,0	A	10	10,0	W	24	8,16	W	34	14,20	W	25	20,5	W	25	8,16	A	15	15,0	W	22	15,7	W	30	19,11	W	15	5,10	A	23	22,1	W	28	10,18	W	13
Marker25937	162.701	Cma_Chr01	11130603	G	A	A	11	0,11	G	16	16,0	G	24	23,1	G	2	2,0	R	19	15,4	R	12	11,1	R	25	20,5	R	31	22,9	R	62	28,34	R	8	5,3	R	41	32,9	R	18	15,3	G	37	37,0	R	53	31,22	R	26
Marker25136	162.701	Cma_Chr01	10872029	C	T	T	15	0,15	C	14	14,0	C	41	41,0	C	27	27,0	Y	37	23,14	Y	35	19,16	Y	33	17,16	Y	36	8,28	C	38	38,0	Y	29	13,16	Y	38	24,14	Y	21	16,5	C	43	43,0	Y	43	17,26	Y	31
Marker26119	163.701	Cma_Chr01	11180092	A	G	G	18	0,18	A	16	16,0	A	3	3,0	G	1	0,1	R	8	4,4	R	5	2,3	R	6	1,5	R	4	3,1	R	3	1,2	R	10	3,7	R	17	4,13	R	4	1,3	A	7	7,0	R	6	3,3	R	2
Marker25869	164.701	Cma_Chr01	11120831	C	T	T	14	0,14	C	14	14,0	C	20	20,0	Y	18	10,8	Y	54	25,29	Y	8	1,7	Y	23	14,9	Y	13	6,7	Y	50	32,18	Y	26	17,9	Y	32	9,23	Y	41	20,21	C	73	73,0	Y	46	31,15	Y	40
Marker25598	165.201	Cma_Chr01	11067992	G	A	A	12	0,12	G	10	10,0	G	28	28,0	R	35	12,23	R	59	33,26	R	35	19,16	R	36	21,15	R	35	17,18	R	41	21,20	R	45	32,13	R	70	40,30	R	30	5,25	G	59	58,1	R	76	47,29	R	36
Marker26170	165.701	Cma_Chr01	11189458	T	G	T	14	14,0	G	18	0,18	G	14	0,14	K	16	10,6	K	17	10,7	K	8	7,1	K	22	13,9	K	11	4,7	K	9	6,3	K	20	8,12	K	11	3,8	K	11	7,4	G	12	0,12	K	10	7,3	K	8
Marker25867	165.701	Cma_Chr01	11120664	A	G	G	20	0,20	A	14	14,0	A	20	20,0	R	18	10,8	R	54	24,29	R	8	1,7	R	23	14,9	R	13	6,7	R	48	32,16	R	26	17,9	R	32	9,23	R	41	20,21	A	74	73,1	R	46	31,15	R	41
Marker25866	165.701	Cma_Chr01	11120608	T	C	C	15	0,15	T	17	17,0	T	20	20,0	Y	18	10,8	Y	54	25,29	Y	8	1,7	Y	23	14,9	Y	13	6,7	Y	48	32,16	Y	26	17,9	Y	31	9,22	Y	41	20,21	T	74	74,0	Y	46	31,15	Y	39
Marker26521	166.701	Cma_Chr01	11294318	C	T	T	13	0,13	C	11	11,0	C	2	2,0	N	.	.	Y	4	2,2	T	1	0,1	C	3	3,0	C	1	1,0	Y	6	4,2	Y	6	2,4	Y	5	1,4	N	.	.	C	2	2,0	Y	4	3,1	C	2
Marker25625	166.701	Cma_Chr01	11075108	A	G	G	11	0,11	A	23	23,0	A	5	5,0	R	7	5,2	R	6	2,4	R	7	5,2	R	2	1,1	A	6	5,1	A	5	5,0	R	22	17,5	R	9	7,2	R	2	1,1	A	6	6,0	G	3	0,3	R	5
Marker25626	166.701	Cma_Chr01	11075327	G	A	A	20	1,19	G	12	12,0	G	5	5,0	R	7	5,2	R	6	2,4	R	7	5,2	R	2	1,1	G	5	5,0	G	5	5,0	R	22	17,5	R	9	7,2	R	2	1,1	G	6	6,0	A	3	0,3	R	5
Marker25524	166.701	Cma_Chr01	11054602	T	A	A	11	0,11	T	18	18,0	T	3	3,0	W	6	3,3	W	25	19,6	N	.	.	W	28	7,21	W	13	10,3	W	10	4,6	A	4	0,4	W	16	12,4	W	4	2,2	T	40	40,0	W	34	28,6	W	23
Marker25523	166.701	Cma_Chr01	11054559	C	T	T	11	0,11	C	21	21,0	C	3	3,0	Y	6	3,3	Y	25	19,6	N	.	.	Y	28	7,21	Y	13	10,3	Y	10	4,6	T	4	0,4	Y	16	12,4	Y	4	2,2	C	40	40,0	Y	34	28,6	Y	23
Marker26480	166.701	Cma_Chr01	11285275	G	A	A	13	0,13	G	12	12,0	G	8	8,0	R	15	3,12	R	22	14,8	R	9	7,2	R	10	4,5	R	4	2,2	R	28	18,10	R	27	9,18	R	20	8,12	R	20	11,9	G	17	17,0	R	27	18,9	R	7
Marker25527	166.701	Cma_Chr01	11056509	C	T	T	13	0,13	C	19	19,0	C	3	3,0	Y	15	6,9	Y	19	6,13	C	10	10,0	Y	25	13,12	C	7	7,0	Y	17	8,9	Y	23	14,9	Y	17	9,8	Y	9	2,7	C	15	15,0	Y	22	15,7	Y	5
Marker26477	167.201	Cma_Chr01	11283364	C	G	G	10	0,10	C	16	16,0	C	14	13,1	S	3	2,1	S	15	8,7	S	12	5,7	S	14	12,2	S	21	11,10	S	20	11,9	S	36	24,12	S	24	12,12	S	12	7,5	C	21	20,1	S	51	21,30	S	10
Marker25384	167.201	Cma_Chr01	10988814	G	A	A	10	0,10	G	21	21,0	G	17	16,1	R	16	7,9	R	39	25,14	R	17	11,6	R	23	7,16	R	16	8,8	R	18	12,6	R	29	15,14	R	32	20,12	R	14	4,10	G	26	26,0	R	29	22,7	R	16
Marker25395	167.201	Cma_Chr01	10992472	C	T	T	13	1,12	C	13	13,0	C	59	58,1	Y	40	27,13	Y	140	83,57	Y	32	17,15	Y	84	48,36	Y	96	57,39	Y	65	30,35	Y	34	15,19	Y	80	42,38	Y	49	25,24	C	129	127,1	Y	170	66,104	Y	52
Marker26522	167.201	Cma_Chr01	11294352	A	G	G	15	0,15	A	14	14,0	A	2	2,0	N	.	.	R	4	2,2	G	1	0,1	A	3	3,0	A	1	1,0	R	6	4,2	R	6	2,4	R	5	1,4	N	.	.	A	2	2,0	R	4	2,2	A	2
Marker26344	167.201	Cma_Chr01	11236973	C	T	T	16	1,15	C	22	22,0	C	16	16,0	Y	5	2,3	Y	10	3,7	Y	16	8,8	C	2	2,0	Y	10	9,1	Y	9	4,5	Y	19	8,11	Y	11	8,3	Y	12	5,7	C	12	12,0	C	6	6,0	Y	8
Marker25436	167.711	Cma_Chr01	11012937	C	T	T	13	0,13	C	29	29,0	C	16	16,0	Y	5	2,3	Y	32	8,24	Y	22	8,14	Y	23	11,12	Y	20	8,12	Y	19	9,10	Y	20	4,16	T	12	0,12	Y	12	8,4	C	18	18,0	Y	35	12,23	Y	11
Marker27018	168.416	Cma_Chr01	11396596	C	T	T	20	0,20	C	21	21,0	C	20	20,0	Y	12	8,4	Y	11	6,5	Y	13	7,6	Y	6	4,2	Y	14	12,2	Y	7	5,2	Y	26	12,14	Y	15	8,7	Y	13	1,12	C	16	16,0	Y	7	5,2	Y	7
Marker27317	168.416	Cma_Chr01	11458729	A	C	C	16	1,15	A	20	20,0	A	22	22,0	A	16	16,0	M	16	4,12	M	15	13,2	M	19	8,11	M	9	5,4	M	14	5,9	M	7	3,4	M	21	4,17	M	11	9,2	A	41	40,1	M	37	23,14	M	13
Marker27472	168.916	Cma_Chr01	11508845	C	T	C	17	16,1	T	21	0,21	T	11	0,11	Y	13	6,7	Y	9	4,5	T	9	0,9	Y	5	2,3	Y	6	2,4	Y	16	12,4	N	.	.	Y	10	7,3	C	4	4,0	T	10	0,10	Y	17	10,7	C	2
Marker27019	168.916	Cma_Chr01	11396629	G	A	A	20	0,20	G	19	19,0	G	20	20,0	R	12	8,4	R	11	6,5	R	13	7,6	R	6	4,2	R	14	12,2	R	7	5,2	R	26	12,14	R	15	8,7	R	13	1,12	G	16	16,0	R	7	5,2	R	7
Marker26432	169.417	Cma_Chr01	11271648	C	T	T	16	1,15	C	14	14,0	C	10	10,0	Y	7	1,6	Y	7	2,5	Y	9	3,6	Y	11	7,4	Y	2	1,1	Y	9	4,5	Y	13	8,5	Y	15	11,4	Y	10	6,4	C	13	13,0	Y	11	4,7	Y	6
Marker27200	169.417	Cma_Chr01	11434852	G	A	A	18	1,17	G	10	10,0	G	25	25,0	R	5	3,2	R	57	29,28	R	28	18,10	R	31	12,19	R	25	10,15	R	25	15,9	R	4	2,2	R	43	27,16	R	32	11,21	G	67	67,0	R	37	22,14	R	32
Marker27292	169.417	Cma_Chr01	11449823	A	T	T	10	0,10	A	16	16,0	A	8	8,0	W	13	6,7	W	23	10,13	W	11	4,7	T	17	0,17	W	14	5,9	W	27	14,13	W	54	20,33	W	35	19,16	W	7	6,1	A	36	36,0	W	22	14,8	W	14
Marker26986	169.417	Cma_Chr01	11390502	T	C	C	13	0,13	T	22	22,0	T	4	4,0	C	1	0,1	Y	15	7,8	Y	7	2,5	Y	5	4,1	Y	7	3,4	Y	10	3,7	Y	16	6,10	Y	16	4,12	C	2	0,2	T	8	8,0	Y	8	2,6	Y	5
Marker26985	169.417	Cma_Chr01	11390470	T	C	C	16	0,16	T	23	23,0	T	4	4,0	C	1	0,1	Y	15	7,8	Y	7	2,5	Y	5	4,1	Y	7	3,4	Y	10	3,7	Y	16	6,10	Y	16	4,12	C	2	0,2	T	8	8,0	Y	8	2,6	C	5
Marker26427	169.417	Cma_Chr01	11268925	G	C	C	16	0,16	G	16	16,0	G	4	4,0	C	3	0,3	S	7	4,3	N	.	.	S	9	8,1	S	6	2,4	S	17	13,4	S	13	8,5	S	22	11,11	S	4	3,1	G	7	7,0	S	14	10,4	S	3
Marker27515	169.417	Cma_Chr01	11563232	C	T	T	10	0,10	C	13	13,0	C	24	24,0	Y	8	3,5	Y	31	16,15	Y	31	6,25	Y	22	14,8	Y	16	7,9	Y	7	6,1	Y	10	3,7	Y	39	22,17	Y	16	7,9	C	38	37,1	C	2	2,0	Y	3
Marker27514	169.417	Cma_Chr01	11563196	G	A	A	11	0,11	G	15	15,0	G	24	24,0	R	8	3,5	R	31	16,15	R	32	7,25	R	22	14,8	R	16	7,9	R	7	6,1	R	10	3,7	R	39	22,17	R	16	7,9	G	38	37,1	G	2	2,0	R	3
Marker27530	169.417	Cma_Chr01	11566592	G	T	T	10	0,10	G	15	15,0	G	15	15,0	K	8	3,5	T	2	0,2	N	.	.	K	5	2,3	K	8	1,7	G	1	1,0	K	31	16,15	K	5	4,1	K	9	5,4	G	1	1,0	K	13	9,4	T	2
Marker27316	169.417	Cma_Chr01	11458517	C	T	T	18	1,17	C	15	15,0	C	23	23,0	C	16	16,0	Y	16	4,12	Y	15	13,2	Y	19	8,11	Y	9	5,4	Y	14	5,9	Y	6	2,4	Y	21	4,16	Y	11	9,2	C	42	42,0	Y	37	23,14	Y	13
Marker26600	169.917	Cma_Chr01	11304178	G	A	A	14	0,14	G	15	15,0	G	16	15,1	R	21	7,14	R	62	31,31	R	30	9,21	R	63	38,25	R	29	11,18	R	70	36,34	R	38	19,19	R	61	29,32	R	40	27,13	G	63	63,0	R	79	39,40	R	33
Marker26984	169.917	Cma_Chr01	11390424	G	A	A	18	0,18	G	20	20,0	G	5	5,0	A	3	0,3	R	16	8,8	R	7	2,5	R	5	4,1	R	7	3,4	R	10	3,7	R	16	6,10	R	15	4,11	A	3	0,3	G	13	13,0	R	7	2,5	R	5
Marker27250	169.917	Cma_Chr01	11442986	A	G	G	14	0,14	A	16	16,0	A	16	16,0	R	2	1,1	R	36	17,19	R	19	9,10	A	14	14,0	R	15	11,4	R	28	13,15	R	16	14,2	R	34	24,10	R	9	7,2	A	50	48,1	R	75	33,42	R	18
Marker27165	169.917	Cma_Chr01	11430190	A	C	C	17	0,17	A	21	21,0	A	17	17,0	M	10	4,6	M	29	22,7	M	13	8,5	M	21	13,8	A	6	6,0	M	14	10,4	M	22	8,14	A	18	17,1	M	7	6,1	A	21	21,0	M	23	13,10	M	6
Marker27571	169.917	Cma_Chr01	11578113	T	C	C	12	0,12	T	20	20,0	T	34	34,0	Y	3	1,2	Y	29	25,4	Y	20	12,8	Y	17	8,9	Y	16	13,3	Y	28	21,7	Y	18	5,13	Y	39	14,25	Y	10	8,2	T	15	15,0	Y	9	4,5	Y	13
Marker27570	169.917	Cma_Chr01	11578099	T	G	G	13	0,13	T	19	19,0	T	34	34,0	K	3	1,2	K	29	25,4	K	20	12,8	K	17	8,9	K	16	13,3	K	28	21,7	K	18	5,12	K	39	14,25	K	10	8,2	T	15	15,0	K	9	4,5	K	13
Marker27578	170.417	Cma_Chr01	11580076	A	G	G	17	1,16	A	21	21,0	A	46	46,0	R	19	11,8	R	100	52,48	R	65	36,29	R	59	33,26	R	59	34,25	R	79	44,35	R	60	33,27	R	59	27,32	R	37	13,24	A	88	88,0	R	50	29,21	R	36
Marker27246	170.417	Cma_Chr01	11442716	C	T	T	12	0,12	C	21	21,0	C	6	6,0	Y	7	4,3	Y	34	10,24	Y	6	2,4	Y	28	12,16	Y	17	12,5	Y	29	19,10	Y	37	26,11	Y	10	5,5	Y	19	13,6	C	20	20,0	Y	32	22,10	Y	16
Marker27247	170.417	Cma_Chr01	11442726	T	C	C	13	0,13	T	22	22,0	T	6	6,0	Y	7	4,3	Y	34	9,24	Y	6	2,4	Y	28	12,16	Y	17	12,5	Y	29	19,10	Y	37	26,11	Y	10	5,5	Y	19	13,6	T	20	20,0	Y	32	22,10	Y	16
Marker27062	170.417	Cma_Chr01	11409301	G	T	T	10	0,10	G	10	10,0	G	3	3,0	K	4	2,2	T	8	0,8	G	1	1,0	N	.	.	T	1	0,1	K	2	1,1	K	5	3,2	G	2	2,0	N	.	.	G	6	6,0	T	7	0,7	G	2
Marker27681	171.417	Cma_Chr01	11615147	C	T	T	16	0,16	C	12	12,0	C	3	3,0	Y	18	9,9	Y	10	6,4	Y	18	5,13	Y	15	12,3	Y	14	11,3	Y	13	4,9	Y	34	16,18	Y	13	8,5	T	1	0,1	C	21	21,0	Y	19	12,7	Y	13
Marker26933	171.417	Cma_Chr01	11379952	T	G	G	15	0,15	T	13	13,0	T	33	33,0	K	25	9,16	K	72	32,40	K	37	17,20	K	63	35,28	K	47	19,28	K	83	33,50	K	70	41,29	K	80	29,51	K	32	16,16	T	60	60,0	K	70	37,33	K	36
Marker28059	171.917	Cma_Chr01	11712853	G	T	G	20	20,0	T	15	0,15	T	4	0,4	K	10	3,7	K	24	13,11	K	5	2,3	K	13	3,10	K	9	1,8	K	20	15,5	K	36	13,23	K	35	17,18	K	8	5,3	T	14	0,14	K	19	16,3	K	10
Marker27897	172.417	Cma_Chr01	11677020	C	T	C	17	16,1	T	18	0,18	T	15	0,15	Y	10	3,7	Y	30	9,21	Y	13	3,10	Y	13	7,6	Y	7	4,3	Y	24	5,19	Y	20	8,12	Y	17	3,14	Y	7	3,4	T	15	0,15	Y	8	4,4	Y	9
Marker28295	173.417	Cma_Chr01	11816043	G	C	G	16	16,0	C	11	0,11	C	25	0,25	S	19	10,9	S	29	23,6	S	20	14,6	S	18	12,6	S	17	7,10	S	21	6,15	S	21	7,14	S	11	7,4	S	16	5,11	C	17	0,17	S	23	15,8	S	15
Marker28065	173.417	Cma_Chr01	11714034	A	G	A	13	13,0	G	15	0,15	G	16	0,16	R	8	5,3	R	31	14,17	R	30	22,8	R	28	19,9	R	21	12,9	R	29	16,13	R	29	21,8	R	32	19,13	R	25	10,15	G	43	0,43	R	37	16,21	R	26
Marker27832	173.417	Cma_Chr01	11658436	A	G	G	13	0,13	A	15	15,0	A	12	12,0	R	14	4,10	R	17	5,12	R	16	8,8	R	32	17,15	R	8	2,6	R	25	13,12	R	12	5,7	R	12	5,7	R	10	5,5	A	24	24,0	R	22	8,14	R	11
Marker27830	173.417	Cma_Chr01	11658178	A	G	G	21	1,20	A	17	17,0	A	12	12,0	R	14	4,10	R	17	5,12	R	16	8,8	R	32	17,15	R	8	2,6	R	25	13,12	R	12	5,7	R	12	5,7	R	10	5,5	A	24	24,0	R	22	8,14	R	11
Marker28165	173.417	Cma_Chr01	11759190	A	G	G	19	1,18	A	10	10,0	A	21	21,0	R	9	3,6	R	38	14,24	R	21	9,12	R	23	6,17	R	22	9,13	R	37	19,18	R	50	20,30	R	27	13,14	R	16	10,6	A	30	30,0	A	29	29,0	R	10
Marker27866	173.417	Cma_Chr01	11668130	A	G	G	20	1,19	A	33	33,0	A	4	4,0	R	13	8,5	R	6	2,4	R	9	2,7	R	12	3,9	G	5	0,5	R	8	6,2	R	15	6,9	R	8	2,6	R	4	3,1	A	6	6,0	R	4	2,2	R	5
Marker27905	173.417	Cma_Chr01	11677376	G	A	A	11	0,11	G	16	16,0	G	10	10,0	R	13	8,5	R	40	31,9	R	12	7,5	R	25	18,7	R	25	11,14	R	14	7,7	R	36	22,14	R	20	13,7	R	15	7,8	G	26	26,0	R	33	18,15	R	26
Marker27904	173.417	Cma_Chr01	11677353	A	C	A	10	10,0	C	14	0,14	C	10	0,10	M	13	5,8	M	40	9,31	M	12	5,7	M	25	7,18	M	25	14,11	M	14	7,7	M	35	14,21	M	20	7,13	M	15	8,7	C	25	0,25	M	33	15,18	M	26
Marker27901	173.417	Cma_Chr01	11677129	C	A	A	15	1,14	C	19	19,0	C	10	10,0	M	13	8,5	M	40	31,9	M	12	7,5	M	25	18,7	M	25	11,14	M	14	7,7	M	38	22,16	M	20	13,7	M	15	7,8	C	26	26,0	M	33	18,15	M	26
Marker27737	173.417	Cma_Chr01	11639012	T	A	A	11	0,11	T	14	14,0	T	9	9,0	W	5	3,2	W	15	12,3	W	7	3,4	W	10	2,8	W	9	6,3	W	8	4,3	W	23	15,8	W	17	11,6	A	7	0,7	T	1	1,0	W	5	3,2	W	4
Marker27751	173.417	Cma_Chr01	11642985	G	A	G	15	14,1	A	16	0,16	A	24	1,23	R	31	17,14	R	56	38,18	R	30	16,14	R	41	25,16	R	33	19,14	R	72	29,43	R	26	10,16	R	42	15,27	R	26	12,14	A	25	0,25	R	62	33,29	R	22
Marker27899	173.417	Cma_Chr01	11677060	C	T	T	18	1,17	C	17	17,0	C	15	15,0	Y	10	7,3	Y	30	21,9	Y	13	10,3	Y	13	6,7	Y	7	3,4	Y	24	19,5	Y	20	12,8	Y	17	14,3	Y	7	4,3	C	15	15,0	Y	8	4,4	Y	9
Marker27898	173.417	Cma_Chr01	11677043	A	G	G	16	1,15	A	18	18,0	A	15	15,0	R	10	7,3	R	30	21,9	R	13	10,3	R	13	6,7	R	7	3,4	R	24	19,5	R	20	12,8	R	17	14,3	R	7	4,3	A	15	15,0	R	8	4,4	R	9
Marker28310	173.917	Cma_Chr01	11818644	A	T	A	13	12,1	T	18	0,18	T	35	0,35	W	14	8,6	W	31	17,14	W	21	11,10	W	20	11,9	W	18	8,10	W	26	19,7	W	25	10,15	W	5	1,4	W	11	5,6	T	20	0,20	W	26	18,8	W	9
Marker28308	174.622	Cma_Chr01	11818385	C	T	C	14	14,0	T	15	0,15	T	36	0,36	Y	14	8,6	Y	31	17,14	Y	21	11,10	Y	20	11,9	Y	18	8,10	Y	26	19,7	Y	25	10,15	Y	5	1,4	Y	11	5,6	T	20	0,20	Y	26	17,8	Y	9
Marker28800	175.122	Cma_Chr01	11984041	A	C	C	10	0,10	A	21	21,0	A	11	11,0	M	14	7,7	M	26	9,17	M	15	8,7	M	5	3,2	M	29	20,9	M	38	17,21	M	30	19,11	M	11	5,6	M	16	6,10	A	19	19,0	M	43	17,26	M	10
Marker28247	175.122	Cma_Chr01	11800518	G	A	G	13	13,0	A	15	0,15	A	7	0,7	R	11	4,7	G	8	8,0	R	7	3,4	R	6	1,5	G	3	3,0	R	6	4,2	R	16	9,7	R	7	4,3	R	5	2,3	A	1	0,1	G	1	1,0	R	5
Marker28466	175.122	Cma_Chr01	11869129	A	G	A	16	15,1	G	18	0,18	R	7	1,6	N	.	.	G	5	0,5	R	16	7,9	R	8	1,7	R	6	5,1	R	41	23,18	R	9	5,4	R	7	6,1	R	5	4,1	G	3	0,3	R	24	13,11	R	14
Marker28248	175.627	Cma_Chr01	11800551	G	A	G	14	14,0	A	16	0,16	A	7	0,7	R	11	4,7	G	8	8,0	R	7	3,4	R	6	1,5	G	3	3,0	R	6	4,2	R	16	9,7	R	7	4,3	R	5	2,3	A	1	0,1	G	1	1,0	R	5
Marker28307	175.627	Cma_Chr01	11818368	T	G	T	15	15,0	G	12	0,12	G	36	0,36	K	14	8,6	K	31	17,14	K	21	11,10	K	20	11,9	K	18	8,10	K	26	19,7	K	25	10,15	K	5	1,4	K	11	5,6	G	20	0,20	K	26	18,8	K	9
Marker28792	176.332	Cma_Chr01	11981175	A	G	G	22	0,22	A	16	16,0	A	16	15,1	R	9	1,8	R	45	7,38	R	30	10,20	R	31	17,14	R	50	32,18	R	45	19,26	R	42	12,30	R	29	12,17	R	28	11,17	A	49	49,0	R	39	10,29	R	23
Marker28680	176.332	Cma_Chr01	11942227	C	G	C	11	11,0	G	16	0,16	G	17	0,17	S	6	5,1	S	11	5,6	S	29	14,15	C	13	13,0	S	30	18,12	S	26	13,13	S	14	8,6	G	19	1,18	S	7	3,4	G	8	0,8	S	5	3,2	S	13
Marker28810	176.332	Cma_Chr01	11989210	T	C	C	26	1,25	T	27	27,0	T	23	23,0	Y	12	4,8	Y	23	11,11	Y	4	2,2	Y	14	9,5	Y	7	5,2	Y	18	12,6	Y	25	11,14	Y	10	6,4	Y	15	10,5	T	6	6,0	Y	18	7,11	Y	6
Marker28808	176.332	Cma_Chr01	11988955	T	C	C	11	0,11	T	23	23,0	T	23	23,0	Y	12	4,8	Y	23	12,11	Y	4	2,2	Y	13	8,5	Y	7	5,2	Y	18	12,6	Y	25	11,14	Y	10	6,4	Y	15	10,5	T	6	6,0	Y	18	7,11	Y	6
Marker28681	176.332	Cma_Chr01	11942492	A	G	A	12	12,0	G	12	0,12	G	17	0,17	R	6	5,1	R	11	5,6	R	29	14,15	A	14	13,1	R	30	18,12	R	26	13,13	R	15	9,6	G	19	1,18	R	7	3,4	G	8	0,8	R	5	3,2	R	13
Marker28575	177.332	Cma_Chr01	11919083	A	G	A	14	14,0	G	20	0,20	G	23	0,23	G	11	0,11	R	50	20,30	R	14	6,8	R	25	11,14	R	25	11,14	R	41	28,13	R	25	11,14	R	48	15,33	R	20	6,14	G	38	0,38	R	27	13,14	R	9
Marker28574	177.332	Cma_Chr01	11919027	T	C	T	14	14,0	C	21	0,21	C	23	0,23	C	11	0,11	Y	50	20,30	Y	14	6,8	Y	25	11,14	Y	25	11,14	Y	41	28,13	Y	25	10,15	Y	48	15,32	Y	20	6,14	C	38	0,38	Y	27	13,14	Y	9
Marker28689	177.832	Cma_Chr01	11945598	T	C	T	14	14,0	C	18	0,18	C	15	0,15	Y	12	4,8	Y	15	6,9	Y	18	5,13	Y	20	13,7	Y	30	19,11	Y	29	14,15	Y	25	10,15	Y	32	17,15	C	6	0,6	C	15	0,15	Y	8	7,1	Y	13
Marker28948	177.832	Cma_Chr01	12074037	G	A	G	21	20,1	A	17	0,17	A	8	0,8	R	8	4,4	R	21	12,9	R	12	5,7	R	18	11,7	R	5	2,3	R	22	12,10	R	31	16,15	R	22	8,14	R	17	9,8	A	13	0,13	R	16	8,8	R	16
Marker28944	177.832	Cma_Chr01	12073884	G	C	G	18	17,1	C	12	0,12	C	9	0,9	S	8	4,4	S	20	12,8	S	12	5,7	S	18	11,7	S	6	1,4	S	22	12,10	S	31	16,15	S	22	8,14	S	15	7,8	C	15	0,15	S	16	8,8	S	16
Marker29256	178.832	Cma_Chr01	12197552	G	A	A	17	0,17	G	24	24,0	G	22	21,1	A	21	1,20	R	29	16,13	G	16	16,0	R	27	10,17	R	15	11,4	R	29	20,9	R	25	14,11	R	34	18,16	R	21	4,17	G	25	25,0	R	19	11,8	R	4
Marker28729	178.832	Cma_Chr01	11960626	A	G	A	21	20,1	G	23	0,23	G	19	0,19	R	7	3,4	R	35	18,17	R	29	12,17	R	48	18,30	R	26	12,14	R	52	24,27	R	63	27,36	R	58	26,32	R	16	6,10	G	60	1,59	R	37	21,16	R	18
Marker28999	178.832	Cma_Chr01	12093298	A	T	A	23	23,0	T	23	0,23	T	36	0,36	W	26	17,9	W	63	27,36	W	43	17,26	W	39	25,14	W	36	12,24	W	61	38,23	W	49	17,32	W	41	22,19	W	17	8,9	T	68	0,68	W	54	36,18	W	52
Marker28998	178.832	Cma_Chr01	12093256	T	C	T	21	21,0	C	21	0,21	C	36	0,36	Y	26	17,9	Y	63	27,36	Y	43	17,26	Y	39	25,14	Y	36	12,24	Y	61	38,23	Y	49	17,32	Y	41	22,19	Y	17	8,9	C	68	0,67	Y	54	36,18	Y	52
Marker29143	178.832	Cma_Chr01	12147267	C	T	T	23	1,22	C	24	24,0	C	18	18,0	Y	8	3,5	Y	60	23,37	C	16	16,0	Y	37	5,32	Y	18	11,7	Y	47	17,30	Y	33	19,14	Y	35	17,18	Y	24	12,12	C	25	25,0	Y	53	32,21	Y	26
Marker29026	178.832	Cma_Chr01	12098401	C	T	C	15	15,0	T	19	0,19	T	16	1,15	Y	32	21,11	Y	49	20,29	Y	45	26,19	Y	74	41,33	Y	48	29,19	Y	55	29,26	Y	18	9,9	Y	41	23,18	Y	33	20,13	T	45	0,45	Y	54	36,18	Y	30
Marker29255	179.833	Cma_Chr01	12197354	C	G	G	13	0,13	C	18	18,0	C	22	21,1	G	21	1,20	S	29	16,13	C	16	16,0	S	27	10,17	S	15	11,4	S	29	20,9	S	24	14,10	S	34	18,16	S	21	4,17	C	25	25,0	S	19	11,8	S	4
Marker29142	179.833	Cma_Chr01	12147261	T	C	C	25	1,24	T	25	25,0	T	18	18,0	Y	8	3,5	Y	60	23,37	T	16	16,0	Y	37	5,32	Y	18	11,7	Y	47	17,30	Y	33	19,14	Y	35	17,18	Y	24	12,12	T	25	25,0	Y	53	32,21	Y	26
Marker29103	179.833	Cma_Chr01	12134687	T	A	T	21	20,1	A	26	0,26	A	5	0,5	W	13	6,7	W	5	3,2	A	11	0,11	W	20	13,7	W	14	8,6	W	10	8,2	W	14	4,10	W	9	3,6	W	15	7,8	A	10	0,10	W	9	3,6	W	3
Marker29462	180.333	Cma_Chr01	12264302	A	G	G	10	0,10	A	16	16,0	A	5	4,1	R	18	8,10	R	33	14,19	A	17	17,0	R	44	26,18	R	30	7,23	R	43	27,16	R	10	5,5	R	43	24,19	R	19	8,11	A	45	44,0	R	47	20,26	R	26
Marker31173	180.833	Cma_Chr01	12894289	A	G	G	20	0,20	A	16	16,0	A	2	2,0	A	1	1,0	R	9	5,4	R	3	1,2	A	9	9,0	A	1	1,0	R	12	2,10	R	20	8,12	R	26	16,10	N	.	.	A	4	4,0	R	5	3,2	R	11
Marker29352	180.833	Cma_Chr01	12242846	T	G	G	22	0,22	T	17	17,0	T	22	22,0	K	4	3,1	K	21	16,5	T	8	8,0	K	29	14,15	K	8	6,2	K	31	10,21	K	24	6,18	K	24	8,16	K	15	7,8	T	13	13,0	K	40	12,28	K	14
Marker29346	180.833	Cma_Chr01	12242424	C	T	T	19	1,18	C	21	21,0	C	1	1,0	Y	5	4,1	Y	12	4,8	N	.	.	Y	20	15,5	Y	14	6,8	Y	2	1,1	Y	23	12,11	C	3	3,0	Y	6	4,2	C	29	29,0	Y	16	7,9	Y	7
Marker29283	180.833	Cma_Chr01	12219877	C	G	G	11	0,11	C	14	14,0	C	9	9,0	C	1	1,0	S	9	4,5	C	5	5,0	S	14	2,12	S	4	3,1	S	16	9,7	S	19	11,8	S	7	5,2	C	4	4,0	C	1	1,0	C	8	8,0	G	2
Marker29962	180.833	Cma_Chr01	12417091	A	G	G	10	0,10	A	13	13,0	A	5	5,0	R	12	5,7	R	22	11,11	A	3	3,0	R	24	15,9	R	5	1,4	R	15	4,11	G	3	1,2	R	17	11,6	R	11	4,7	A	28	27,1	R	14	7,7	R	13
Marker29948	180.833	Cma_Chr01	12412640	T	A	A	24	0,24	T	17	17,0	T	18	18,0	W	24	8,16	A	30	1,29	T	10	10,0	W	47	22,25	W	22	7,15	W	43	4,39	W	32	25,7	W	42	14,28	W	25	12,13	T	6	6,0	W	32	5,26	A	29
Marker29942	180.833	Cma_Chr01	12411567	C	T	T	14	0,14	C	16	16,0	N	.	.	C	3	3,0	Y	15	8,6	C	5	5,0	C	5	5,0	Y	9	5,4	Y	5	3,2	Y	12	7,5	Y	17	7,10	N	.	.	C	8	8,0	Y	9	3,6	Y	5
Marker29531	180.833	Cma_Chr01	12300402	A	G	A	12	12,0	G	22	0,22	G	15	0,15	A	1	1,0	R	21	8,13	R	13	1,12	R	22	15,7	R	14	5,9	R	19	13,6	A	2	2,0	R	8	3,5	R	11	8,3	G	15	0,15	R	8	6,2	R	6
Marker29463	180.833	Cma_Chr01	12264310	T	C	C	10	0,10	T	14	14,0	T	5	5,0	Y	18	8,10	Y	33	14,19	T	17	17,0	Y	44	26,18	Y	30	7,23	Y	43	27,16	Y	10	5,5	Y	43	24,19	Y	19	8,11	T	45	45,0	Y	47	20,27	Y	26
Marker29662	181.333	Cma_Chr01	12334268	C	A	C	16	15,1	A	18	0,18	A	29	0,29	M	19	6,13	M	102	57,45	A	36	0,36	M	48	25,23	M	50	23,27	M	57	25,32	M	10	2,8	M	78	40,38	M	51	27,24	A	78	1,77	M	60	29,31	M	40
Marker29906	181.333	Cma_Chr01	12401201	C	T	T	17	1,16	C	14	14,0	C	3	3,0	C	3	3,0	Y	13	6,7	C	1	1,0	Y	47	25,22	Y	14	9,5	Y	11	8,3	Y	5	3,2	Y	21	3,18	Y	10	7,3	C	24	24,0	Y	53	15,38	Y	22
Marker29961	182.333	Cma_Chr01	12417081	A	G	G	12	0,12	A	14	14,0	A	4	4,0	R	12	5,7	R	22	11,11	A	3	3,0	R	24	15,7	R	5	1,4	R	15	4,11	R	3	1,2	R	17	11,6	R	11	4,7	A	28	27,1	R	14	7,7	R	13
Marker30289	182.833	Cma_Chr01	12521500	C	T	T	13	0,13	C	18	18,0	C	7	7,0	Y	14	7,7	Y	41	30,11	C	10	10,0	Y	13	6,7	Y	18	8,10	Y	19	11,8	Y	11	5,6	Y	27	9,18	Y	16	10,6	C	24	24,0	Y	31	23,8	Y	13
Marker30315	183.333	Cma_Chr01	12540462	T	A	T	14	14,0	A	18	0,18	A	9	0,9	W	10	5,5	W	11	5,6	A	5	0,5	W	20	15,5	W	5	3,2	A	4	0,4	W	4	2,2	W	5	1,4	A	2	0,2	W	15	2,13	W	7	2,5	A	7
Marker31266	183.333	Cma_Chr01	12961388	C	T	C	11	11,0	T	19	0,19	T	47	0,47	Y	37	22,15	Y	107	50,57	Y	70	33,37	Y	63	29,34	Y	68	42,26	Y	106	44,62	Y	70	46,24	Y	83	45,38	Y	41	24,17	T	122	1,121	Y	97	34,63	Y	25
Marker30492	183.333	Cma_Chr01	12599477	C	T	T	12	0,12	C	23	23,0	C	16	15,1	Y	14	6,8	Y	34	17,17	Y	27	15,12	Y	47	21,26	Y	13	9,4	Y	30	18,12	Y	19	7,12	Y	19	11,8	Y	10	6,4	C	21	21,0	Y	34	20,14	Y	11
Marker30563	183.333	Cma_Chr01	12631407	G	A	G	17	16,1	A	21	0,21	A	10	0,10	R	12	7,5	R	11	8,3	R	12	8,4	R	27	13,14	R	12	6,6	R	21	10,11	R	22	10,12	R	21	13,8	R	18	10,8	A	27	0,27	R	11	7,4	R	7
Marker30616	183.333	Cma_Chr01	12645615	A	T	A	15	15,0	T	18	0,18	T	17	0,17	W	13	4,9	W	9	4,5	W	9	4,5	W	12	7,5	W	27	10,17	W	25	13,12	W	42	26,16	W	27	12,15	W	6	3,3	T	9	0,9	W	21	14,7	W	20
Marker30526	183.333	Cma_Chr01	12605303	G	A	A	12	0,12	G	18	18,0	G	24	24,0	R	15	7,8	R	58	23,35	R	21	9,12	R	37	19,18	R	38	26,12	R	41	19,22	R	28	12,16	R	49	26,23	R	32	17,15	G	46	46,0	R	41	10,31	R	16
Marker30383	183.333	Cma_Chr01	12555019	A	G	A	20	20,0	G	12	0,12	G	14	0,14	R	12	11,1	R	29	18,11	R	17	8,9	R	12	5,7	R	19	11,8	R	18	5,13	R	17	12,5	R	5	3,2	R	10	2,8	G	26	1,25	R	13	11,2	R	15
Marker30382	183.333	Cma_Chr01	12554964	A	G	A	19	18,1	G	14	0,14	G	14	0,14	R	12	11,1	R	29	18,11	R	16	9,7	R	12	5,7	R	19	11,8	R	18	5,13	R	17	12,5	R	5	3,2	R	10	2,8	G	26	1,25	R	13	11,2	R	17
Marker30379	183.333	Cma_Chr01	12554714	A	G	A	18	18,0	G	16	0,16	G	14	0,14	R	12	11,1	R	29	18,11	R	15	6,9	R	12	5,7	R	19	11,8	R	18	5,13	R	17	12,5	R	5	3,2	R	10	2,8	G	26	1,25	R	13	11,2	R	16
Marker30323	183.333	Cma_Chr01	12543396	C	T	C	18	17,1	T	11	0,11	N	.	.	Y	6	3,3	Y	11	7,4	T	7	0,7	Y	7	4,3	Y	9	7,2	Y	13	7,6	Y	11	5,6	Y	10	1,9	T	2	0,2	T	8	0,8	Y	12	9,3	Y	9
Marker30181	183.333	Cma_Chr01	12480417	T	C	C	12	0,12	T	14	14,0	T	12	12,0	Y	8	5,3	Y	11	4,7	T	8	8,0	Y	13	5,8	Y	5	2,3	Y	6	5,1	Y	8	3,5	Y	5	3,2	Y	5	3,2	T	8	8,0	Y	10	2,8	Y	4
Marker30491	183.333	Cma_Chr01	12599373	T	C	C	20	0,20	T	20	20,0	T	18	18,0	Y	7	4,3	Y	7	4,3	Y	15	9,6	Y	22	10,12	Y	14	6,8	Y	23	10,13	Y	21	6,15	Y	26	12,14	Y	7	5,2	T	3	3,0	Y	17	7,10	Y	16
Marker30205	183.333	Cma_Chr01	12487577	A	G	G	22	1,21	A	16	16,0	A	7	7,0	R	16	11,5	R	23	6,17	A	13	13,0	R	23	6,17	R	11	7,4	R	26	9,17	R	10	4,6	R	32	15,17	G	15	0,15	A	11	11,0	R	20	7,13	R	15
Marker29996	183.833	Cma_Chr01	12430289	T	A	A	28	1,27	T	17	17,0	T	8	8,0	W	9	3,6	W	5	2,3	T	8	8,0	A	2	1,1	W	7	4,3	W	11	4,7	W	26	13,13	A	7	1,6	W	7	3,4	T	1	1,0	T	8	8,0	W	9
Marker30085	183.833	Cma_Chr01	12450473	C	T	T	15	0,15	C	19	19,0	C	22	22,0	Y	14	8,6	Y	50	12,38	C	7	7,0	T	39	2,37	Y	25	5,20	Y	22	4,18	Y	17	8,9	Y	33	8,25	Y	9	2,7	C	13	13,0	Y	56	13,43	Y	9
Marker29600	183.833	Cma_Chr01	12314976	A	G	G	16	0,16	A	18	18,0	A	15	15,0	R	18	6,12	R	41	18,23	A	21	21,0	R	35	24,11	R	30	13,17	R	17	8,9	R	31	15,16	R	31	14,17	R	24	5,19	A	28	28,0	R	62	41,21	R	20
Marker29354	183.833	Cma_Chr01	12243296	A	C	C	17	0,17	A	14	14,0	A	4	4,0	M	6	3,3	M	21	8,13	M	17	15,2	M	4	2,2	M	17	9,8	M	15	9,6	M	25	14,11	M	13	4,9	M	8	5,3	A	6	6,0	M	42	25,17	M	26
Marker29353	183.833	Cma_Chr01	12243245	G	A	A	15	0,15	G	18	18,0	G	4	4,0	R	6	3,3	R	21	8,13	R	17	15,2	R	4	2,2	R	17	9,8	R	15	9,6	R	25	14,11	R	13	4,9	R	8	5,3	G	6	6,0	R	42	25,17	R	24
Marker31021	183.833	Cma_Chr01	12834794	T	G	G	15	0,15	T	14	14,0	T	16	15,1	K	24	11,13	K	55	29,26	K	46	16,30	K	60	23,37	K	40	25,15	K	50	23,27	K	22	9,13	K	41	14,27	K	30	16,14	T	60	60,0	K	52	41,11	K	21
Marker29758	183.833	Cma_Chr01	12346633	T	C	C	14	0,14	T	25	25,0	T	10	10,0	Y	18	9,9	Y	15	8,7	T	10	10,0	Y	9	3,6	Y	11	8,3	Y	21	6,15	Y	48	23,25	Y	15	10,5	C	2	0,2	T	12	12,0	Y	14	8,6	Y	14
Marker29557	183.833	Cma_Chr01	12306001	A	G	A	18	17,1	G	14	0,14	R	37	3,34	R	30	11,19	R	96	52,44	G	35	0,35	R	55	34,21	R	56	15,41	R	57	22,35	R	26	12,14	R	44	25,19	R	54	24,30	G	78	1,77	R	68	24,44	R	46
Marker29792	183.833	Cma_Chr01	12351220	A	T	T	16	0,16	A	13	13,0	A	20	20,0	W	7	5,2	W	12	8,4	A	15	15,0	W	30	23,7	W	15	12,3	W	17	11,6	W	31	13,18	W	13	8,5	W	9	4,5	A	18	18,0	W	16	10,6	W	21
Marker30083	183.833	Cma_Chr01	12450274	G	A	A	18	0,18	G	24	24,0	G	22	22,0	R	14	8,6	R	51	11,39	G	7	7,0	A	39	2,37	R	25	5,20	R	23	4,19	R	17	8,9	R	33	8,25	R	9	2,7	G	13	13,0	R	56	13,43	R	9
Marker29560	183.833	Cma_Chr01	12306261	G	A	G	19	19,0	A	24	0,24	R	37	3,34	R	30	11,19	R	96	53,43	A	35	0,35	R	55	34,21	R	56	15,41	R	57	22,35	R	26	12,14	R	44	25,18	R	53	24,29	A	77	1,76	R	68	23,45	R	48
Marker29559	183.833	Cma_Chr01	12306225	A	G	A	21	20,1	G	21	0,21	R	37	3,34	R	30	11,19	R	96	51,44	G	35	0,35	R	55	34,21	R	56	15,41	R	57	22,35	R	26	12,14	R	44	25,19	R	53	24,29	G	77	1,76	R	68	23,45	R	48
Marker29558	183.833	Cma_Chr01	12306058	A	C	A	21	20,1	C	16	0,16	M	37	3,34	M	30	11,19	M	96	52,44	C	35	0,35	M	55	34,21	M	56	15,41	M	57	22,35	M	26	12,14	M	44	25,19	M	54	24,30	C	78	1,77	M	69	24,45	M	46
Marker30314	183.833	Cma_Chr01	12540393	T	C	T	19	18,1	C	31	0,31	C	9	0,9	Y	10	5,5	Y	11	5,6	C	5	0,5	Y	20	15,5	Y	5	3,2	C	4	0,4	Y	4	2,2	Y	5	1,4	C	2	0,2	Y	15	2,13	Y	7	2,5	C	7
Marker30700	184.333	Cma_Chr01	12711269	G	T	T	15	0,15	G	19	19,0	G	11	11,0	K	5	3,2	K	22	15,7	K	22	10,12	K	31	16,15	K	10	4,6	K	30	14,16	K	26	14,12	K	5	4,1	K	27	15,12	G	14	14,0	K	25	14,11	K	21
Marker30699	184.333	Cma_Chr01	12711252	G	A	A	14	0,14	G	18	18,0	G	12	12,0	R	5	3,2	R	22	15,7	R	22	10,12	R	31	16,15	R	10	4,6	R	30	14,16	R	26	14,12	R	5	4,1	R	27	15,12	G	14	14,0	R	25	14,11	R	21
Marker30698	184.333	Cma_Chr01	12711064	A	G	G	13	0,13	A	16	16,0	A	12	12,0	R	5	3,2	R	22	15,7	R	22	10,12	R	31	16,15	R	10	4,6	R	28	14,14	R	26	14,12	R	5	4,1	R	27	15,12	A	14	14,0	R	26	14,12	R	21
Marker30871	184.333	Cma_Chr01	12779738	C	T	T	19	0,19	C	22	22,0	C	9	9,0	Y	18	9,9	Y	39	22,17	Y	18	11,7	Y	22	12,10	Y	21	13,8	Y	32	13,19	Y	13	3,10	Y	8	3,5	Y	16	9,7	C	21	21,0	Y	22	11,11	Y	20
Marker31161	184.833	Cma_Chr01	12892495	G	A	A	17	0,17	G	20	20,0	G	14	14,0	R	11	4,7	G	14	13,1	R	18	9,9	R	15	6,9	R	7	2,5	R	58	24,34	R	20	12,8	R	30	14,16	R	24	8,16	G	11	11,0	R	29	18,11	R	19
Marker31049	184.833	Cma_Chr01	12843290	T	C	T	16	15,1	C	21	0,21	C	23	0,23	C	9	0,9	C	15	0,15	Y	14	4,10	Y	18	6,12	C	14	0,14	Y	24	12,12	C	12	0,12	C	23	1,22	Y	23	11,12	C	42	0,40	Y	41	11,30	Y	26
Marker31318	184.833	Cma_Chr01	13076102	C	T	T	16	0,16	C	17	17,0	C	9	9,0	Y	24	9,15	Y	28	12,16	Y	19	14,5	Y	52	14,38	Y	16	13,3	Y	26	17,9	Y	41	20,20	Y	25	9,16	Y	15	8,7	C	15	15,0	Y	30	23,7	Y	7
Marker31299	184.833	Cma_Chr01	12987853	A	C	C	18	1,17	A	23	23,0	A	25	25,0	M	28	9,19	M	23	16,7	M	17	15,2	M	31	20,11	M	16	8,8	M	20	9,11	M	35	17,18	M	22	9,13	M	10	5,5	A	10	10,0	M	15	9,6	M	20
Marker30764	184.833	Cma_Chr01	12749768	G	A	A	21	0,21	G	13	13,0	G	12	11,1	A	7	0,7	R	10	6,4	R	13	6,7	R	18	5,13	R	6	3,3	R	32	19,13	R	36	14,22	R	15	9,6	R	14	4,10	G	19	19,0	R	17	13,4	R	20
Marker30763	184.833	Cma_Chr01	12749731	C	G	C	17	17,0	G	10	0,10	S	11	1,10	C	7	7,0	S	10	4,6	S	13	7,6	S	18	13,5	S	6	3,3	S	32	13,19	S	36	22,14	S	15	6,9	S	14	10,4	G	19	0,19	S	17	4,13	S	20
Marker31255	184.833	Cma_Chr01	12956711	A	T	A	13	12,1	T	19	0,19	T	10	0,10	W	15	8,7	W	20	10,10	W	12	6,6	W	31	18,13	W	7	1,6	W	17	7,10	W	47	25,22	W	15	6,9	W	21	7,14	T	22	0,22	W	7	3,4	A	4
Marker30885	184.833	Cma_Chr01	12784369	C	A	A	19	0,19	C	17	17,0	C	38	38,0	M	17	9,8	M	11	10,1	M	36	22,14	M	21	12,9	M	34	12,22	M	44	29,15	M	36	13,23	M	39	24,15	M	13	5,8	C	29	29,0	M	39	29,10	M	31
Marker30884	184.833	Cma_Chr01	12784347	T	G	G	20	0,20	T	13	13,0	T	38	38,0	K	17	9,8	K	11	10,1	K	36	22,14	K	21	12,9	K	35	12,23	K	44	29,15	K	36	13,23	K	39	24,15	K	13	5,8	T	29	29,0	K	39	29,10	K	31
Marker30860	184.833	Cma_Chr01	12777102	T	A	A	18	0,18	T	18	18,0	T	6	6,0	W	27	7,20	W	13	8,5	W	18	10,8	W	29	16,13	W	6	4,2	W	29	21,8	W	24	15,9	W	30	9,21	W	18	5,13	T	13	13,0	W	44	26,18	W	8
Marker31097	184.833	Cma_Chr01	12874523	T	A	A	18	0,18	T	20	20,0	T	32	32,0	W	21	4,17	W	21	11,10	W	23	15,8	W	38	23,15	W	23	3,20	W	35	15,20	W	47	21,25	W	21	10,11	W	14	6,8	T	11	11,0	W	33	13,20	W	16
Marker31095	184.833	Cma_Chr01	12874345	A	G	G	18	2,16	A	18	18,0	A	32	32,0	R	21	4,17	R	22	11,11	R	23	15,8	R	38	23,15	R	23	3,20	R	36	15,21	R	47	21,26	R	21	10,11	R	13	6,7	A	10	10,0	R	33	13,20	R	16
Marker30681	184.833	Cma_Chr01	12684772	T	G	T	13	13,0	G	14	0,14	G	18	0,18	K	15	3,12	K	24	8,15	K	27	9,18	K	40	21,19	K	20	12,8	K	28	7,21	K	9	2,7	K	41	4,37	K	25	8,17	G	21	0,21	K	21	9,12	K	12
Marker31058	185.333	Cma_Chr01	12845360	A	C	A	13	13,0	C	18	0,18	C	17	0,17	M	23	12,11	M	44	18,26	M	31	18,13	M	103	44,59	M	33	16,17	M	28	15,13	M	13	5,8	M	31	16,15	M	26	18,8	C	61	0,61	M	57	28,29	M	30
Marker31164	185.333	Cma_Chr01	12892692	T	A	A	19	1,18	T	21	21,0	T	14	13,0	W	11	3,8	T	14	13,1	W	16	8,8	W	14	6,8	W	7	2,5	W	58	24,34	W	20	12,8	W	30	14,16	W	24	8,16	T	11	11,0	W	28	18,10	W	19
Marker31171	185.833	Cma_Chr01	12894151	C	T	T	13	0,13	C	13	13,0	C	20	19,1	Y	13	6,7	Y	34	13,21	Y	42	17,25	Y	67	46,21	Y	28	17,11	Y	54	35,19	Y	33	21,12	Y	43	26,17	Y	22	9,13	C	34	33,1	Y	25	15,10	Y	25
Marker30909	185.833	Cma_Chr01	12787872	A	G	G	19	0,19	A	19	19,0	A	9	9,0	R	8	2,6	R	8	4,4	R	11	3,8	R	3	1,2	A	9	9,0	R	18	6,12	R	13	10,3	R	20	5,15	R	4	1,3	A	16	16,0	R	18	9,9	R	10
Marker30771	185.833	Cma_Chr01	12757736	A	G	A	21	21,0	G	17	0,17	G	9	0,9	R	4	1,3	R	22	7,15	R	15	7,8	R	18	8,10	R	6	4,2	R	16	12,4	R	22	13,9	R	29	25,4	R	9	4,5	G	9	0,9	R	41	18,23	R	12
Marker30663	185.833	Cma_Chr01	12667694	T	A	T	17	17,0	A	15	0,15	A	11	0,11	W	18	10,8	W	80	34,46	W	17	12,5	W	51	22,29	W	38	10,28	W	60	31,29	W	47	19,28	W	61	22,39	W	30	15,15	A	80	1,79	W	77	36,41	W	47
Marker30662	185.833	Cma_Chr01	12667683	A	G	A	15	15,0	G	17	0,17	G	11	0,11	R	18	10,8	R	81	34,47	R	17	12,5	R	51	22,29	R	38	10,28	R	60	31,29	R	47	19,28	R	61	21,39	R	30	15,15	G	80	1,79	R	77	36,41	R	47
Marker30661	185.833	Cma_Chr01	12667558	A	C	A	21	21,0	C	18	0,18	C	11	0,11	M	18	10,8	M	80	34,46	M	17	12,5	M	50	22,28	M	38	10,28	M	60	31,29	M	46	20,26	M	61	22,39	M	30	15,15	C	80	1,79	M	78	37,41	M	46
Marker31172	186.333	Cma_Chr01	12894263	C	T	C	19	18,1	T	16	0,16	T	2	0,2	T	1	0,1	Y	9	4,5	Y	3	2,1	T	9	0,9	T	1	0,1	Y	12	10,2	Y	20	12,8	Y	26	10,16	N	.	.	T	4	0,4	Y	5	2,3	Y	11
Marker30950	186.333	Cma_Chr01	12795760	A	G	G	16	1,15	A	19	19,0	A	8	8,0	R	8	5,3	R	7	3,4	R	5	1,4	R	14	5,9	R	12	7,5	R	3	1,2	R	31	17,14	R	12	2,10	R	4	3,1	A	12	12,0	R	10	3,7	R	2
Marker30660	187.333	Cma_Chr01	12667531	T	A	T	21	21,0	A	23	0,23	A	11	0,11	W	18	10,8	W	81	33,47	W	17	12,5	W	50	22,28	W	38	10,28	W	60	31,29	W	46	20,26	W	61	22,39	W	30	15,15	A	80	1,79	W	78	37,41	W	45
Marker31278	187.333	Cma_Chr01	12966569	A	G	A	19	18,1	G	22	0,22	G	14	0,14	R	9	2,7	R	22	10,12	R	4	3,1	R	20	4,16	R	27	16,11	R	24	13,11	R	34	17,17	R	18	4,14	R	26	16,10	G	11	0,11	R	22	14,8	R	25
Marker31277	187.333	Cma_Chr01	12966546	A	G	A	17	16,1	G	24	0,24	G	14	0,14	R	9	2,7	R	22	10,12	R	4	3,1	R	20	4,16	R	27	16,11	R	24	13,10	R	34	17,17	R	18	4,14	R	26	16,10	G	11	0,11	R	24	14,10	R	25
Marker31382	0	Cma_Chr02	154534	C	G	G	14	0,14	C	21	21,0	G	3	0,3	N	.	.	C	22	22,0	G	1	0,1	G	37	0,37	C	18	18,0	C	12	12,0	G	2	0,2	S	13	3,10	S	20	13,7	C	31	31,0	S	38	25,13	C	26
Marker31429	0	Cma_Chr02	322935	A	G	G	21	0,21	A	28	28,0	G	7	0,7	G	1	0,1	A	20	20,0	G	8	0,8	R	12	1,11	A	2	2,0	A	17	17,0	G	41	0,41	R	8	5,3	R	5	4,1	A	10	10,0	R	11	6,5	A	7
Marker31400	0	Cma_Chr02	163403	T	G	G	17	0,17	T	15	15,0	K	24	3,21	K	14	7,6	T	64	64,0	G	25	0,25	G	49	1,48	T	58	58,0	T	35	34,0	G	67	0,67	K	39	20,19	K	39	19,20	T	86	86,0	K	54	38,16	T	40
Marker31399	0	Cma_Chr02	163212	T	G	G	15	0,15	T	19	19,0	K	24	3,21	K	14	9,5	T	64	64,0	G	25	0,25	G	49	1,48	T	59	58,0	T	35	35,0	G	67	0,67	K	39	20,19	K	39	19,20	T	86	85,1	K	54	38,16	T	39
Marker31398	0	Cma_Chr02	163139	T	C	C	13	0,13	T	15	15,0	Y	24	3,21	Y	14	9,5	T	64	64,0	C	24	0,24	C	48	1,47	T	59	59,0	T	35	35,0	C	67	0,67	Y	38	20,18	Y	39	19,20	T	86	86,0	Y	54	38,16	T	39
Marker31431	0	Cma_Chr02	323192	T	G	G	14	0,14	T	25	25,0	K	13	8,5	K	13	9,4	T	19	19,0	G	17	1,16	G	25	0,25	T	17	16,1	T	17	17,0	G	16	0,16	K	11	10,1	K	17	3,14	T	15	15,0	K	18	6,12	T	15
Marker31433	0	Cma_Chr02	323358	T	C	C	18	0,18	T	14	14,0	Y	13	8,5	Y	13	9,4	T	19	19,0	C	17	1,16	C	25	0,25	T	16	16,0	T	17	17,0	C	16	0,16	Y	11	10,1	Y	17	3,14	T	15	15,0	Y	18	6,12	T	15
Marker31413	0.5	Cma_Chr02	167293	A	G	G	20	0,20	A	17	17,0	R	41	25,16	R	27	10,17	A	82	82,0	G	46	0,46	G	88	2,86	A	55	55,0	A	52	52,0	G	26	1,25	R	69	39,30	R	59	28,31	A	111	111,0	R	115	43,72	A	59
Marker31439	0.5	Cma_Chr02	324512	G	A	A	11	0,11	G	16	16,0	R	32	20,12	R	16	12,4	R	23	20,3	R	28	3,25	A	23	0,23	G	18	18,0	G	30	30,0	A	20	1,19	R	25	10,15	R	7	4,3	G	12	12,0	R	40	17,23	G	16
Marker31792	2	Cma_Chr02	462265	G	C	C	24	0,24	G	16	16,0	S	27	13,14	S	25	10,15	G	65	65,0	C	30	1,29	C	67	0,67	G	34	34,0	G	50	50,0	C	15	0,15	S	78	43,35	S	26	7,19	G	53	52,1	G	44	44,0	G	26
Marker31796	2	Cma_Chr02	462904	A	G	G	24	0,24	A	19	19,0	R	22	6,16	R	6	4,2	A	25	25,0	G	14	0,14	G	19	0,19	A	13	13,0	A	30	30,0	G	30	0,30	R	35	20,15	R	6	3,3	A	19	19,0	A	19	19,0	A	7
Marker31912	2.501	Cma_Chr02	495293	T	C	C	18	0,18	T	14	14,0	Y	12	8,4	Y	7	3,4	T	51	50,0	C	27	0,27	C	37	0,37	T	15	15,0	T	25	24,1	C	18	0,18	T	30	30,0	Y	25	19,5	T	42	41,1	T	25	25,0	T	36
Marker31911	2.501	Cma_Chr02	495277	G	C	C	19	0,19	G	14	14,0	S	12	8,4	S	7	3,4	G	51	51,0	C	27	0,27	C	37	0,37	G	15	15,0	G	25	24,1	C	18	0,17	G	30	30,0	S	25	20,5	G	42	41,1	G	25	25,0	G	36
Marker32006	2.501	Cma_Chr02	509452	A	T	T	11	0,11	A	17	17,0	W	7	2,5	W	12	7,5	A	10	10,0	T	9	0,9	T	9	0,9	A	12	12,0	A	11	11,0	T	26	0,26	A	14	14,0	W	9	5,4	A	5	5,0	A	8	8,0	A	4
Marker31866	2.501	Cma_Chr02	486642	A	C	C	12	0,12	A	13	13,0	M	13	5,8	A	8	8,0	A	5	5,0	C	5	0,5	C	25	0,25	A	9	9,0	A	15	15,0	C	31	0,31	A	21	20,1	M	9	8,1	A	13	13,0	A	3	3,0	A	4
Marker31965	2.501	Cma_Chr02	502593	G	A	A	18	0,18	G	15	15,0	A	1	0,1	N	.	.	G	7	7,0	A	9	0,9	A	7	0,7	N	.	.	G	3	3,0	A	4	0,4	G	4	4,0	A	2	0,2	G	4	4,0	N	.	.	N	.
Marker31947	2.501	Cma_Chr02	498701	A	G	G	11	0,11	A	13	13,0	R	17	7,10	R	9	4,5	A	9	9,0	G	6	0,6	G	6	0,6	A	18	18,0	A	14	14,0	G	18	0,18	A	13	13,0	R	9	1,8	A	16	16,0	A	20	20,0	A	4
Marker31946	2.501	Cma_Chr02	498605	C	T	T	12	0,12	C	20	20,0	Y	17	7,10	Y	7	2,5	C	9	9,0	T	6	0,6	T	6	0,6	C	18	18,0	C	14	14,0	T	17	0,17	C	13	13,0	Y	9	1,8	C	16	16,0	C	20	20,0	C	4
Marker32080	3.001	Cma_Chr02	535002	A	T	T	20	0,20	A	12	12,0	W	10	9,1	W	8	5,3	A	8	8,0	T	21	0,21	T	28	1,27	A	5	5,0	A	20	20,0	T	7	0,7	A	20	20,0	W	16	9,7	A	16	16,0	A	13	13,0	A	13
Marker32171	3.001	Cma_Chr02	558478	G	A	A	11	0,11	G	21	21,0	R	12	6,6	R	19	6,13	G	18	18,0	A	23	1,22	A	22	0,22	G	20	19,1	G	21	21,0	A	55	0,55	G	44	44,0	R	10	7,3	G	28	28,0	G	26	26,0	G	23
Marker32170	3.001	Cma_Chr02	558471	C	G	G	12	0,12	C	19	19,0	S	12	6,6	S	19	6,13	C	18	18,0	G	23	0,23	G	22	0,22	C	20	19,1	C	21	21,0	G	55	0,55	C	44	44,0	S	10	7,3	C	28	28,0	C	26	26,0	C	23
Marker32065	3.001	Cma_Chr02	532936	A	G	G	21	0,21	A	15	15,0	R	51	29,22	R	27	14,13	A	85	84,1	G	39	0,39	G	60	1,59	A	46	46,0	A	72	71,1	G	78	1,77	A	84	84,0	R	34	16,18	A	58	58,0	A	51	51,0	A	46
Marker32064	3.001	Cma_Chr02	532922	A	G	G	20	0,20	A	15	15,0	R	51	29,22	R	27	14,13	A	85	84,1	G	39	0,39	G	60	1,58	A	46	46,0	A	72	71,1	G	78	1,77	A	84	84,0	R	34	16,18	A	59	59,0	A	51	51,0	A	46
Marker32143	3.001	Cma_Chr02	547401	T	C	C	11	0,11	T	17	17,0	Y	41	19,22	Y	48	24,24	T	187	186,1	C	43	2,41	C	156	1,155	T	88	88,0	T	85	85,0	C	98	5,93	T	77	75,2	Y	75	54,21	T	250	248,1	T	250	248,2	T	149
Marker32009	3.001	Cma_Chr02	509639	C	T	T	13	0,13	C	12	12,0	Y	7	2,5	Y	12	7,5	C	10	10,0	T	9	0,9	T	9	0,9	C	12	12,0	C	11	11,0	T	26	0,26	C	14	14,0	Y	9	5,4	C	5	5,0	C	8	8,0	C	4
Marker32102	3.001	Cma_Chr02	537399	T	C	C	13	0,13	T	15	15,0	Y	11	7,4	Y	10	4,6	T	14	14,0	C	16	0,16	C	13	0,13	T	15	15,0	T	8	8,0	C	6	0,6	T	18	17,1	Y	15	3,12	T	11	11,0	Y	13	12,1	T	7
Marker32103	4.501	Cma_Chr02	538018	C	A	A	12	0,12	C	23	23,0	M	8	2,6	M	3	2,1	C	30	29,1	M	14	2,12	A	16	0,16	C	9	9,0	C	26	26,0	A	28	0,28	C	12	12,0	M	10	4,6	C	16	16,0	C	19	19,0	C	13
Marker32721	4.501	Cma_Chr02	900444	T	C	C	19	0,19	T	23	23,0	Y	5	2,3	Y	8	7,1	T	12	12,0	C	10	0,10	C	9	0,9	T	7	7,0	T	5	5,0	C	10	0,10	T	9	9,0	Y	5	1,4	T	14	14,0	T	19	19,0	T	12
Marker32720	4.501	Cma_Chr02	900400	T	C	C	21	0,21	T	25	25,0	Y	5	2,3	Y	8	7,1	T	12	12,0	C	10	0,10	C	9	0,9	T	7	7,0	T	5	5,0	C	11	0,10	T	9	9,0	Y	5	1,4	T	14	14,0	T	19	19,0	T	12
Marker32719	4.501	Cma_Chr02	900386	G	A	A	20	0,20	G	22	22,0	R	5	2,3	R	8	7,1	G	12	12,0	A	10	0,10	A	9	0,9	G	7	7,0	G	5	5,0	A	11	0,11	G	9	9,0	R	5	1,4	G	14	14,0	G	19	19,0	G	12
Marker32332	4.501	Cma_Chr02	701044	T	C	T	24	24,0	C	19	0,19	Y	12	4,8	Y	13	6,7	C	17	0,17	T	7	7,0	T	18	18,0	C	8	0,8	C	33	0,33	T	10	10,0	Y	9	2,7	Y	3	2,1	C	18	0,18	C	27	0,27	C	15
Marker32331	4.501	Cma_Chr02	700875	A	G	A	15	15,0	G	15	0,15	R	12	4,8	R	13	6,7	G	17	0,17	A	7	7,0	A	17	17,0	G	8	0,8	G	33	0,33	A	10	10,0	R	9	2,7	R	3	2,1	G	18	0,18	G	27	0,27	G	15
Marker32255	6.001	Cma_Chr02	609814	A	G	G	16	0,16	A	17	17,0	A	1	1,0	A	3	3,0	A	13	13,0	G	5	0,5	G	3	0,3	R	2	1,1	A	10	10,0	G	33	0,33	A	4	4,0	R	3	1,2	A	8	8,0	A	15	15,0	N	.
Marker32540	6.501	Cma_Chr02	773416	C	G	C	21	21,0	G	11	0,11	S	6	1,5	S	5	4,1	G	4	0,4	C	6	6,0	C	2	2,0	G	5	0,5	G	6	0,6	C	13	13,0	G	1	0,1	C	5	5,0	G	18	0,18	G	16	1,15	N	.
Marker32294	6.501	Cma_Chr02	673020	C	T	T	12	0,12	C	20	20,0	Y	20	11,9	Y	8	2,6	C	37	37,0	T	20	0,20	T	59	2,57	C	39	39,0	C	39	39,0	T	29	0,29	C	38	37,0	Y	36	18,18	C	37	37,0	C	31	31,0	C	27
Marker32268	6.501	Cma_Chr02	647824	A	C	C	12	0,12	A	18	18,0	M	22	10,12	M	19	5,14	A	16	16,0	C	18	0,18	C	32	0,32	A	26	26,0	A	11	11,0	C	20	0,20	A	5	5,0	M	11	5,6	M	9	5,4	A	7	7,0	A	13
Marker32516	6.501	Cma_Chr02	766577	G	A	G	20	20,0	A	24	0,24	R	18	11,7	R	12	9,3	A	20	0,20	G	38	38,0	G	13	13,0	A	20	0,20	A	25	0,25	G	35	35,0	A	29	1,28	R	6	3,3	A	20	0,20	A	30	1,29	A	31
Marker32514	6.501	Cma_Chr02	766397	T	C	T	16	16,0	C	21	0,21	Y	18	11,7	Y	13	9,4	C	19	0,19	T	38	38,0	T	13	13,0	C	20	0,20	C	25	0,25	T	35	35,0	C	29	0,29	Y	6	3,3	C	20	0,20	C	30	1,29	C	31
Marker32513	6.501	Cma_Chr02	766390	T	C	T	14	14,0	C	20	0,20	Y	18	11,7	Y	13	9,4	C	19	0,19	T	38	38,0	T	13	13,0	C	20	0,20	C	25	0,25	T	35	35,0	C	29	0,29	Y	6	3,3	C	20	0,20	C	30	1,29	C	31
Marker32642	7.502	Cma_Chr02	884175	G	A	A	15	0,15	G	20	20,0	R	25	15,10	R	13	8,5	G	40	40,0	A	15	0,15	A	29	0,29	G	36	35,1	G	61	61,0	A	53	0,53	G	39	38,1	R	32	25,7	G	40	38,2	G	35	35,0	G	32
Marker32663	8.002	Cma_Chr02	892749	C	G	C	22	22,0	G	12	0,12	S	24	12,12	S	19	4,15	G	76	1,75	C	44	44,0	C	80	79,1	G	49	0,49	G	68	0,68	C	60	58,2	G	87	0,87	S	44	25,19	G	81	0,81	G	94	0,93	G	44
Marker32662	8.002	Cma_Chr02	892732	T	C	T	17	17,0	C	13	0,13	Y	24	12,12	Y	19	4,15	C	76	1,75	T	44	44,0	T	80	79,1	C	49	0,49	C	68	0,68	T	60	58,2	C	87	0,87	Y	44	25,19	C	81	0,81	C	95	0,95	C	44
Marker32692	9.002	Cma_Chr02	897274	G	C	G	16	16,0	C	16	0,16	S	23	11,12	S	20	2,18	C	39	0,39	G	24	24,0	G	35	35,0	C	21	0,21	C	31	0,31	G	24	24,0	C	36	0,36	S	19	11,8	C	45	0,45	C	41	0,41	C	29
Marker32660	10.002	Cma_Chr02	892346	C	G	C	16	16,0	G	12	0,12	S	13	12,1	S	12	5,7	S	11	2,9	C	22	21,1	C	30	30,0	G	10	0,10	G	22	0,22	C	14	14,0	G	25	0,25	C	3	3,0	G	7	0,7	S	2	1,1	G	10
Marker32917	12.604	Cma_Chr02	1087090	C	T	T	18	0,18	C	15	15,0	Y	18	14,4	Y	6	4,2	C	47	47,0	T	26	0,26	T	22	0,22	C	19	19,0	C	39	39,0	T	49	1,48	C	26	26,0	T	16	0,16	C	40	40,0	C	28	28,0	C	9
Marker32916	12.604	Cma_Chr02	1087079	T	C	C	20	0,20	T	17	17,0	Y	18	14,4	Y	6	4,2	T	47	47,0	C	26	0,26	C	22	0,22	T	19	19,0	T	39	39,0	C	49	1,48	T	26	26,0	C	16	0,16	T	40	40,0	T	28	28,0	T	9
Marker33258	12.604	Cma_Chr02	1166185	G	T	T	10	0,10	G	18	18,0	G	1	1,0	K	19	11,8	G	26	26,0	T	29	0,29	T	31	0,31	G	19	19,0	G	29	29,0	T	32	0,32	G	36	36,0	T	15	0,15	G	30	30,0	G	34	34,0	K	13
Marker33245	12.604	Cma_Chr02	1163457	A	G	G	13	0,13	A	20	20,0	R	19	14,5	R	17	12,5	A	29	29,0	G	15	0,15	G	20	1,19	A	24	24,0	A	35	35,0	G	36	0,36	A	24	24,0	G	18	0,18	A	20	20,0	A	33	33,0	R	22
Marker33243	12.604	Cma_Chr02	1163388	T	G	G	12	0,12	T	23	23,0	K	19	15,4	K	17	12,5	T	29	29,0	G	15	0,15	G	20	1,19	T	24	24,0	T	35	35,0	G	36	0,36	T	24	24,0	G	18	0,18	T	20	20,0	T	33	33,0	K	22
Marker33244	12.604	Cma_Chr02	1163451	C	A	A	13	0,13	C	21	21,0	M	19	15,4	M	17	12,5	C	29	29,0	A	15	0,14	A	20	1,19	C	24	24,0	C	35	35,0	A	36	0,36	C	24	24,0	A	18	0,18	C	20	20,0	C	33	33,0	M	22
Marker33187	12.604	Cma_Chr02	1149649	T	G	G	24	0,24	T	22	22,0	K	25	17,8	K	14	4,10	T	48	48,0	G	31	0,31	G	63	1,62	T	30	30,0	T	65	65,0	G	11	0,11	T	64	63,1	G	28	0,28	T	76	76,0	T	95	95,0	T	35
Marker33265	12.604	Cma_Chr02	1167473	A	C	A	16	16,0	C	17	0,17	M	19	9,10	M	23	9,14	C	29	1,28	A	5	5,0	A	17	17,0	C	16	0,16	C	25	0,25	A	51	51,0	C	28	0,28	A	13	13,0	C	28	1,27	C	15	0,15	C	14
Marker33139	12.604	Cma_Chr02	1143899	G	A	G	11	11,0	A	10	0,10	R	27	8,19	R	17	9,8	A	41	0,41	G	31	31,0	G	55	55,0	A	11	0,11	A	31	0,31	G	12	12,0	A	44	0,44	G	17	17,0	A	59	0,59	A	49	0,49	A	22
Marker32824	13.104	Cma_Chr02	1039598	C	T	C	12	12,0	T	16	0,16	Y	47	21,26	Y	26	12,14	T	87	0,87	C	49	48,1	C	56	54,2	T	66	2,63	T	72	3,69	C	50	49,1	T	104	1,103	C	42	42,0	T	88	0,88	T	120	0,120	T	54
Marker32823	13.104	Cma_Chr02	1039588	C	T	C	11	11,0	T	17	0,17	Y	47	21,26	Y	26	12,14	T	87	0,87	C	49	48,1	C	56	54,2	T	66	3,63	T	72	3,69	C	49	49,0	T	104	1,103	C	42	42,0	T	86	0,86	T	120	0,120	T	51
Marker33088	14.104	Cma_Chr02	1137301	T	G	G	11	0,11	T	17	17,0	K	5	3,2	G	6	0,6	T	16	15,1	G	11	0,11	K	10	1,9	T	2	2,0	T	12	12,0	G	17	0,17	T	13	13,0	G	11	0,11	T	13	13,0	T	22	22,0	T	4
Marker33087	14.104	Cma_Chr02	1137285	A	G	G	12	0,12	A	18	18,0	R	5	3,2	G	6	0,6	A	17	16,1	G	11	0,11	R	11	1,10	A	2	2,0	A	11	11,0	G	17	0,17	A	13	13,0	G	11	0,11	A	13	13,0	A	22	22,0	A	4
Marker33085	14.604	Cma_Chr02	1137030	C	T	T	16	0,16	C	17	17,0	Y	5	3,2	T	6	0,6	C	16	15,1	T	11	0,11	Y	9	1,8	C	2	2,0	C	12	12,0	T	17	0,17	C	13	13,0	T	10	0,10	C	13	13,0	C	23	23,0	C	5
Marker33604	18.814	Cma_Chr02	1357834	C	T	C	15	15,0	T	19	0,19	Y	12	7,5	T	8	0,8	T	20	0,20	C	17	17,0	C	4	4,0	T	19	0,19	T	30	0,30	C	20	20,0	T	24	0,24	C	9	8,1	Y	16	1,15	T	23	0,23	T	14
Marker33607	18.814	Cma_Chr02	1358099	T	C	T	12	12,0	C	21	0,21	Y	12	7,5	C	8	0,8	C	20	0,20	T	17	17,0	T	4	4,0	C	19	0,19	C	30	0,30	T	20	20,0	C	24	0,24	Y	10	9,1	C	17	1,16	C	23	0,23	C	14
Marker33606	18.814	Cma_Chr02	1358085	T	G	T	11	11,0	G	21	0,21	K	12	7,5	G	8	0,8	G	20	0,20	T	17	17,0	T	4	4,0	G	19	0,19	G	30	0,30	T	20	20,0	G	24	0,24	K	10	9,1	G	17	1,16	G	23	0,23	G	14
Marker33862	19.314	Cma_Chr02	1395457	G	C	G	11	11,0	C	19	0,19	S	19	10,9	C	12	0,12	C	25	1,24	G	27	26,1	G	29	28,1	S	26	2,24	C	27	0,27	G	19	19,0	C	33	0,33	S	13	12,1	C	27	1,26	C	42	0,42	C	15
Marker34184	19.814	Cma_Chr02	1473751	T	C	T	17	17,0	C	14	0,14	Y	38	10,28	C	7	0,7	C	12	0,12	T	9	9,0	T	21	21,0	C	14	0,14	C	24	0,24	T	36	36,0	C	20	0,20	T	13	13,0	C	10	0,10	C	22	0,22	C	1
Marker34288	19.814	Cma_Chr02	1497800	C	A	A	17	0,17	C	13	13,0	M	5	1,4	C	9	9,0	C	33	33,0	A	2	0,2	A	19	0,19	C	13	13,0	C	12	12,0	A	14	0,14	C	16	16,0	A	19	0,19	C	39	39,0	C	26	25,0	C	4
Marker34417	19.814	Cma_Chr02	1525870	C	A	A	18	0,18	C	19	19,0	M	42	15,27	C	45	45,0	C	131	131,0	A	55	1,54	A	63	0,63	C	76	75,1	C	68	68,0	A	62	0,62	C	108	107,1	A	49	0,49	C	102	102,0	C	72	72,0	C	49
Marker34373	19.814	Cma_Chr02	1516442	G	A	A	16	0,16	G	14	14,0	R	16	10,6	G	11	11,0	G	15	15,0	A	18	0,18	A	28	0,28	G	13	13,0	G	23	22,1	A	37	1,35	G	33	33,0	A	28	0,28	G	18	18,0	G	19	18,1	G	7
Marker34263	19.814	Cma_Chr02	1492998	C	A	C	20	20,0	A	21	0,21	M	28	10,18	A	27	0,27	A	61	1,60	C	48	48,0	C	34	34,0	A	22	0,22	A	22	0,22	C	17	16,1	A	52	0,52	C	17	16,1	A	51	2,49	A	60	0,60	A	25
Marker34261	19.814	Cma_Chr02	1492771	C	T	C	12	12,0	T	23	0,23	Y	28	10,18	T	27	0,27	T	61	1,60	C	46	46,0	C	34	34,0	T	22	0,22	T	23	0,23	C	17	16,1	T	52	0,52	C	17	16,1	T	51	1,50	T	59	0,59	T	24
Marker34176	19.814	Cma_Chr02	1470859	T	C	C	14	0,14	T	15	15,0	Y	37	9,28	T	15	15,0	T	11	11,0	C	20	0,20	C	10	0,10	T	17	17,0	T	39	39,0	C	27	0,27	T	26	26,0	C	13	0,13	T	13	13,0	T	28	28,0	T	4
Marker34166	19.814	Cma_Chr02	1469360	T	A	A	10	0,10	T	14	14,0	W	39	18,21	T	15	15,0	T	37	37,0	A	18	0,18	A	19	0,19	T	22	22,0	T	47	47,0	A	19	0,19	T	45	45,0	A	13	0,13	T	32	32,0	T	28	28,0	T	17
Marker33883	19.814	Cma_Chr02	1399272	T	G	T	20	20,0	G	17	0,17	K	6	2,4	G	14	0,14	G	23	0,23	T	15	15,0	T	15	15,0	G	12	0,12	G	21	0,21	T	13	13,0	G	12	0,12	T	11	11,0	G	20	0,20	G	27	0,27	G	6
Marker34518	19.814	Cma_Chr02	1537411	G	A	G	21	21,0	A	15	0,15	R	12	3,9	A	3	0,3	R	14	2,12	G	7	7,0	G	15	15,0	R	13	1,12	A	14	0,14	G	35	34,1	A	21	0,21	G	15	15,0	R	11	1,10	A	18	0,18	A	3
Marker34388	19.814	Cma_Chr02	1519982	C	T	T	21	0,21	C	12	12,0	Y	9	3,6	C	6	6,0	C	7	7,0	T	10	0,10	T	13	0,13	C	21	21,0	C	22	22,0	T	31	0,31	C	27	27,0	T	2	0,2	C	18	18,0	C	7	7,0	C	12
Marker34010	19.814	Cma_Chr02	1431559	A	T	A	15	15,0	T	24	0,24	W	23	6,17	T	16	0,16	T	91	1,89	A	13	13,0	A	14	14,0	T	21	1,20	T	34	0,34	A	22	21,1	T	48	0,48	A	35	34,0	T	55	0,55	T	105	0,105	T	51
Marker34403	20.314	Cma_Chr02	1523903	C	T	T	14	0,14	C	15	15,0	Y	13	5,8	C	9	9,0	C	26	26,0	T	7	0,7	T	17	0,17	C	15	15,0	C	24	24,0	T	23	0,23	C	28	28,0	T	13	0,13	C	27	27,0	C	29	29,0	C	10
Marker35015	23.921	Cma_Chr02	1977590	C	T	C	15	15,0	T	11	0,11	Y	6	3,3	T	5	0,5	T	10	0,10	C	7	7,0	C	11	11,0	T	4	0,4	T	3	0,3	C	7	7,0	T	14	0,14	C	6	6,0	T	17	0,17	T	9	0,9	T	1
Marker34795	24.421	Cma_Chr02	1926341	G	A	G	12	12,0	A	19	0,19	R	8	6,2	A	3	0,3	A	18	0,18	G	2	2,0	G	9	9,0	A	4	0,4	A	1	0,1	G	12	12,0	A	10	0,10	G	9	9,0	A	9	0,9	A	26	0,26	A	8
Marker35124	24.421	Cma_Chr02	1992748	G	T	T	13	0,13	G	21	21,0	K	26	9,17	G	13	13,0	G	26	26,0	T	13	0,13	T	17	0,17	G	7	7,0	G	26	26,0	T	30	0,30	G	19	18,1	T	6	0,6	G	15	14,1	G	20	20,0	G	10
Marker34794	24.421	Cma_Chr02	1926289	G	A	G	13	13,0	A	14	0,14	R	17	11,6	A	22	0,22	A	50	1,49	G	22	22,0	G	29	29,0	A	34	1,33	A	28	0,28	G	36	34,2	A	47	0,47	G	8	8,0	A	38	0,38	A	64	0,64	A	20
Marker34793	24.421	Cma_Chr02	1926046	C	T	T	11	0,11	C	15	15,0	Y	17	6,11	C	22	22,0	C	50	49,1	T	22	0,22	T	29	0,29	C	35	34,1	C	28	28,0	T	36	2,34	C	47	46,1	T	8	0,8	C	38	38,0	C	66	66,0	C	19
Marker35090	24.921	Cma_Chr02	1986682	T	A	A	12	0,12	T	15	15,0	W	29	17,12	T	16	16,0	T	36	36,0	W	23	2,21	A	19	0,19	T	25	24,1	T	51	50,1	A	26	0,26	T	64	63,1	A	25	0,25	T	50	50,0	T	69	69,0	T	25
Marker35164	25.421	Cma_Chr02	2002110	G	A	A	14	0,14	G	21	21,0	R	28	18,10	G	7	7,0	G	30	30,0	A	15	0,15	A	19	0,19	G	24	24,0	G	13	13,0	A	6	0,6	G	20	20,0	A	11	0,11	G	24	23,1	G	24	23,1	G	19
Marker34877	25.921	Cma_Chr02	1945178	C	A	A	11	0,11	C	17	17,0	M	66	30,36	C	27	27,0	C	165	164,1	A	51	3,48	A	78	1,77	C	47	47,0	C	46	46,0	A	43	1,42	C	52	52,0	A	47	1,46	C	102	101,1	C	107	107,0	C	29
Marker35526	32.763	Cma_Chr02	2346523	G	T	G	20	20,0	T	14	0,14	K	11	6,5	T	14	0,14	T	75	1,74	G	23	23,0	G	63	59,4	T	24	0,24	T	48	0,48	K	41	37,4	T	34	0,34	G	12	12,0	T	66	0,66	T	47	0,47	T	28
Marker35482	32.763	Cma_Chr02	2329514	C	T	C	17	17,0	T	15	0,15	Y	2	1,1	T	7	0,7	T	16	0,16	C	6	6,0	C	17	17,0	T	12	0,12	T	17	0,17	C	14	14,0	T	13	0,13	C	7	7,0	T	15	0,15	T	21	0,21	T	5
Marker35527	33.263	Cma_Chr02	2347945	G	A	G	12	12,0	A	15	0,15	R	12	4,8	A	6	0,6	A	7	0,7	R	16	13,3	G	20	20,0	A	15	0,15	A	16	0,16	G	41	41,0	A	17	0,17	G	13	13,0	A	6	0,6	A	9	0,9	R	5
Marker36164	35.865	Cma_Chr02	2563843	C	A	C	18	18,0	A	20	0,20	M	17	9,8	A	14	0,14	A	25	0,25	M	18	3,15	C	25	25,0	M	11	1,10	M	17	5,12	C	150	150,0	A	32	0,32	C	18	18,0	A	20	0,20	M	10	6,4	A	15
Marker36230	36.866	Cma_Chr02	2575032	C	T	T	10	0,10	C	17	17,0	Y	35	14,20	C	16	16,0	C	47	46,0	Y	27	13,14	T	50	0,49	C	27	26,1	C	40	40,0	T	32	0,32	C	43	43,0	T	18	0,18	C	43	43,0	Y	21	9,11	C	28
Marker36170	36.866	Cma_Chr02	2566409	C	A	C	11	11,0	A	14	0,14	M	15	6,9	A	4	0,4	A	11	0,11	M	14	7,7	C	27	27,0	A	10	0,10	A	11	0,11	C	31	31,0	A	23	0,23	C	10	10,0	A	10	0,10	M	6	2,4	A	8
Marker36169	36.866	Cma_Chr02	2566382	A	C	C	11	0,11	A	19	19,0	M	15	9,6	A	4	4,0	A	11	11,0	M	14	7,7	C	27	0,27	A	10	10,0	A	11	11,0	C	31	0,31	A	23	23,0	C	10	0,10	A	10	10,0	M	6	4,2	A	8
Marker36156	36.866	Cma_Chr02	2562239	G	A	G	14	14,0	A	14	0,14	R	33	23,10	A	15	1,14	A	50	1,49	R	23	8,15	G	27	27,0	A	31	0,31	A	67	0,67	G	36	36,0	A	40	0,40	R	24	22,2	A	59	0,59	R	81	43,38	A	63
Marker36242	37.366	Cma_Chr02	2577900	C	T	C	21	21,0	T	14	0,14	Y	13	9,4	T	13	0,13	T	15	0,15	Y	7	4,3	C	13	13,0	T	8	0,8	T	19	0,19	C	16	16,0	T	12	0,12	C	23	23,0	T	7	0,7	Y	10	8,2	T	3
Marker36953	43.908	Cma_Chr02	3276553	G	T	T	15	0,15	G	17	17,0	K	5	4,1	G	7	7,0	T	24	0,24	K	22	8,14	T	28	0,28	G	19	19,0	G	26	25,1	T	35	1,34	K	35	18,17	T	12	0,12	G	19	19,0	K	14	3,11	G	9
Marker36952	43.908	Cma_Chr02	3276544	A	G	G	13	0,13	A	17	17,0	R	5	4,1	A	7	7,0	G	24	0,24	R	22	8,14	G	28	0,28	A	19	19,0	A	26	25,1	G	35	1,34	R	35	18,17	G	12	0,12	A	19	19,0	R	14	3,11	A	9
Marker37250	44.408	Cma_Chr02	3318087	A	C	A	10	10,0	C	24	0,24	M	8	4,4	C	3	0,3	A	17	17,0	A	4	4,0	A	7	7,0	C	8	0,8	C	30	0,30	A	9	9,0	M	20	8,12	A	5	5,0	C	12	0,12	M	14	10,4	C	19
Marker37109	44.408	Cma_Chr02	3298588	G	A	G	14	13,1	A	17	0,17	R	25	17,8	A	16	0,16	G	26	26,0	R	17	11,6	G	30	30,0	A	18	0,18	A	47	0,47	G	46	46,0	R	43	16,27	G	18	17,1	A	31	0,31	R	31	6,25	A	21
Marker37107	44.408	Cma_Chr02	3298400	T	G	T	12	12,0	G	18	0,18	K	25	17,8	G	16	0,16	T	26	26,0	K	17	11,6	T	30	30,0	G	18	0,18	G	47	0,47	T	46	46,0	K	44	17,27	T	18	17,1	G	31	0,31	K	31	6,25	G	22
Marker37106	44.408	Cma_Chr02	3298392	T	A	T	12	12,0	A	18	0,18	W	25	17,8	A	16	0,16	T	26	26,0	W	17	11,6	T	30	30,0	A	18	0,18	A	47	0,47	T	46	46,0	W	44	17,27	T	18	17,1	A	31	0,31	W	31	6,25	A	22
Marker37208	44.408	Cma_Chr02	3309887	T	A	T	19	19,0	A	28	0,28	W	10	6,4	A	8	0,8	T	17	17,0	W	18	10,8	T	57	55,1	A	9	0,9	A	26	0,26	T	27	26,1	W	13	6,7	T	6	6,0	A	13	0,13	W	14	3,11	A	10
Marker36880	44.408	Cma_Chr02	3255990	T	C	C	14	0,14	T	13	13,0	Y	14	10,4	Y	2	1,1	C	4	0,4	Y	25	10,15	C	6	0,6	T	10	10,0	T	16	16,0	C	58	0,57	Y	6	3,3	C	3	0,3	C	1	0,1	Y	11	8,3	Y	6
Marker36879	44.408	Cma_Chr02	3255971	G	A	A	15	0,15	G	13	13,0	R	14	10,4	R	2	1,1	A	4	0,4	R	25	10,15	A	6	0,6	G	10	10,0	G	16	16,0	A	58	0,58	R	6	3,3	A	3	0,3	A	1	0,1	R	11	8,3	R	6
Marker37192	44.908	Cma_Chr02	3306984	A	T	A	19	19,0	T	15	0,15	W	17	6,11	T	19	0,19	A	15	15,0	W	17	6,11	A	27	27,0	T	33	0,33	T	14	0,14	A	23	22,1	W	17	3,14	A	13	13,0	T	27	0,27	W	12	4,8	T	10
Marker37191	44.908	Cma_Chr02	3306921	T	A	T	19	19,0	A	15	0,15	W	17	6,11	A	19	0,19	T	15	15,0	W	17	6,11	T	27	27,0	A	36	0,36	A	14	0,14	T	23	22,1	W	17	3,14	T	13	13,0	A	27	0,27	W	12	4,8	A	10
Marker37644	47.009	Cma_Chr02	3402472	T	C	T	18	18,0	C	23	0,23	Y	14	6,8	Y	11	1,10	T	24	24,0	Y	19	9,10	T	19	19,0	Y	12	1,11	C	25	0,25	T	35	35,0	Y	30	15,15	T	12	12,0	C	7	0,7	Y	16	10,6	Y	8
Marker37586	47.009	Cma_Chr02	3399432	G	A	G	14	14,0	A	10	0,10	R	10	7,3	A	10	0,10	G	13	13,0	R	6	2,4	G	18	18,0	A	6	0,6	A	37	1,36	G	26	26,0	R	21	12,9	G	7	7,0	A	26	0,26	R	41	18,23	A	11
Marker37584	47.009	Cma_Chr02	3399244	A	G	A	16	16,0	G	15	0,15	R	10	7,3	G	11	0,11	A	13	13,0	R	6	2,4	A	17	17,0	G	6	0,6	G	37	1,36	A	26	26,0	R	21	12,9	A	7	7,0	G	26	0,26	R	41	18,23	G	11
Marker37643	47.509	Cma_Chr02	3402449	A	G	A	15	15,0	G	22	0,22	R	14	6,8	R	11	1,10	A	24	23,1	R	19	9,10	A	19	19,0	R	12	1,11	G	25	0,25	A	35	35,0	R	30	15,15	A	12	12,0	G	7	0,7	R	16	10,6	R	8
Marker37642	47.509	Cma_Chr02	3402439	G	A	G	11	11,0	A	23	0,23	R	14	6,8	R	11	1,10	G	24	24,0	R	19	9,10	G	19	19,0	R	12	1,11	A	25	0,25	G	35	35,0	R	30	15,15	G	12	12,0	A	7	0,7	R	16	10,6	R	8
Marker37661	48.009	Cma_Chr02	3407451	C	G	G	15	0,15	C	16	16,0	C	10	10,0	C	8	8,0	G	24	0,24	S	9	7,2	G	4	0,4	C	23	23,0	C	14	14,0	G	14	0,14	S	30	19,11	G	19	0,19	C	25	25,0	S	28	20,8	C	7
Marker38297	48.509	Cma_Chr02	3488663	T	C	C	14	0,14	T	16	16,0	Y	7	3,4	T	10	10,0	C	25	0,25	Y	12	6,6	C	24	0,24	T	15	15,0	T	25	25,0	C	10	0,10	Y	17	11,6	C	16	0,16	T	35	35,0	Y	25	14,11	T	20
Marker38296	48.509	Cma_Chr02	3488638	A	G	G	13	0,13	A	15	15,0	R	7	3,4	A	10	10,0	G	25	0,25	R	12	6,6	G	24	0,24	A	19	19,0	A	25	25,0	G	10	0,10	R	17	11,6	G	16	0,16	A	35	35,0	R	25	14,11	A	20
Marker37953	48.509	Cma_Chr02	3439261	A	T	T	20	2,18	A	13	13,0	W	12	2,10	A	21	21,0	W	23	2,21	W	21	13,8	T	17	0,17	A	9	9,0	A	9	9,0	T	23	0,23	A	5	5,0	T	3	0,3	A	6	6,0	W	10	5,5	A	17
Marker38097	48.509	Cma_Chr02	3452859	C	T	T	19	0,19	C	10	10,0	Y	7	3,4	C	13	13,0	T	26	0,26	Y	10	7,3	T	27	0,27	C	32	32,0	C	7	7,0	T	10	0,10	Y	18	4,14	T	19	0,19	C	28	28,0	T	17	1,16	C	17
Marker38275	48.509	Cma_Chr02	3487384	T	G	G	13	0,13	T	19	19,0	K	31	15,16	T	20	20,0	G	55	0,55	K	30	12,18	G	60	0,60	T	28	28,0	T	44	44,0	G	29	0,29	K	54	33,21	G	28	1,27	T	70	70,0	K	90	49,41	T	32
Marker38274	48.509	Cma_Chr02	3487309	C	T	T	18	0,18	C	21	21,0	Y	31	15,16	C	20	20,0	T	55	0,55	Y	26	12,14	T	60	0,60	C	28	28,0	C	44	44,0	T	30	1,29	Y	54	33,21	T	29	1,28	C	70	70,0	Y	90	49,41	C	32
Marker38111	48.509	Cma_Chr02	3454798	A	G	G	15	0,15	A	18	18,0	R	36	18,18	A	3	3,0	G	26	0,26	R	10	5,5	G	28	0,28	A	10	10,0	A	23	23,0	G	30	0,30	R	37	17,20	G	11	0,11	A	2	2,0	R	12	5,7	A	13
Marker37790	48.509	Cma_Chr02	3420778	C	T	C	18	18,0	T	18	0,18	Y	7	2,5	T	12	0,12	C	16	16,0	Y	16	12,4	C	15	15,0	T	22	0,22	T	15	0,15	C	19	19,0	Y	18	8,10	C	17	17,0	T	32	0,32	Y	17	9,8	T	8
Marker37689	48.509	Cma_Chr02	3410518	G	T	T	15	0,15	G	24	24,0	K	10	7,3	G	17	17,0	T	47	0,47	K	20	11,9	T	46	3,43	G	41	41,0	G	32	32,0	T	10	0,10	K	43	30,13	T	11	0,11	G	76	76,0	K	50	21,27	G	26
Marker38823	49.509	Cma_Chr02	3591620	G	T	T	16	1,15	G	23	23,0	K	12	8,4	G	10	9,1	K	12	1,11	K	6	1,5	T	10	0,10	G	6	6,0	G	6	6,0	T	16	0,16	K	14	7,7	T	8	0,8	G	5	5,0	K	9	6,3	G	15
Marker39567	50.509	Cma_Chr02	3692680	C	T	T	13	0,13	C	12	12,0	Y	8	6,2	Y	5	3,2	T	5	0,5	C	9	9,0	T	4	0,4	Y	13	12,1	Y	15	11,3	T	9	0,9	Y	12	9,3	N	.	.	C	9	9,0	Y	6	4,2	C	11
Marker39566	50.509	Cma_Chr02	3692659	C	T	T	13	0,13	C	11	11,0	Y	8	6,2	Y	5	3,2	T	5	0,5	C	9	9,0	T	4	0,4	Y	13	12,1	Y	15	12,3	T	9	0,9	Y	12	9,3	N	.	.	C	9	9,0	Y	6	4,2	C	11
Marker39588	50.509	Cma_Chr02	3695151	T	C	C	10	0,10	T	20	20,0	Y	29	6,23	T	39	39,0	C	84	0,83	Y	29	16,13	C	78	1,77	T	47	47,0	T	62	62,0	C	37	0,37	Y	48	26,22	C	49	1,48	T	94	94,0	Y	67	37,30	T	61
Marker39586	50.509	Cma_Chr02	3695028	C	A	A	14	0,14	C	12	12,0	M	29	6,23	C	39	39,0	A	85	1,84	M	28	16,12	A	78	1,77	C	46	46,0	C	62	61,0	A	37	0,37	M	49	26,23	A	50	2,48	C	93	92,0	M	67	37,30	C	61
Marker39585	50.509	Cma_Chr02	3694958	C	T	T	15	0,15	C	13	13,0	Y	29	6,23	C	37	37,0	T	84	1,83	Y	29	16,13	T	76	1,75	C	47	47,0	C	62	62,0	T	37	0,37	Y	49	26,23	T	51	0,48	C	94	94,0	Y	67	37,30	C	61
Marker39564	50.509	Cma_Chr02	3692317	C	T	T	23	0,23	C	16	16,0	Y	6	3,3	C	21	21,0	T	23	0,23	Y	12	3,9	T	34	0,34	C	15	15,0	C	29	29,0	T	26	0,26	Y	39	31,8	T	9	0,9	C	10	10,0	Y	14	10,4	C	23
Marker39711	50.509	Cma_Chr02	3712093	C	T	T	20	1,19	C	26	26,0	Y	23	15,8	C	14	14,0	T	38	0,38	Y	16	12,4	T	28	0,28	C	16	16,0	C	29	29,0	T	39	0,39	Y	36	14,22	T	12	0,12	C	12	12,0	Y	17	12,5	C	18
Marker40007	50.509	Cma_Chr02	3759786	C	G	G	19	1,18	C	24	24,0	S	15	7,8	C	33	32,0	G	3	0,3	S	18	13,5	G	22	0,22	C	31	31,0	C	58	58,0	G	10	0,10	S	21	18,3	G	16	0,16	C	38	38,0	S	41	30,10	C	28
Marker40003	50.509	Cma_Chr02	3759570	C	A	A	22	1,21	C	25	25,0	M	15	7,8	C	33	33,0	A	3	0,3	M	17	13,4	A	23	1,22	C	31	31,0	C	58	58,0	M	12	1,11	M	21	18,3	A	16	0,16	C	38	38,0	M	41	31,10	C	29
Marker39847	50.509	Cma_Chr02	3734412	T	C	C	20	1,19	T	21	21,0	C	4	0,4	T	2	2,0	C	1	0,1	Y	7	4,3	C	1	0,1	T	8	8,0	T	12	12,0	C	11	0,11	Y	22	6,16	C	3	0,3	Y	7	5,2	Y	17	7,10	T	11
Marker39846	50.509	Cma_Chr02	3734378	T	C	C	21	1,20	T	22	22,0	C	4	0,4	T	2	2,0	C	1	0,1	Y	7	4,3	C	1	0,1	T	8	8,0	T	12	12,0	C	11	0,11	Y	22	5,17	C	3	0,3	Y	7	5,2	Y	17	7,10	T	10
Marker39642	50.509	Cma_Chr02	3699872	T	C	C	15	0,15	T	15	15,0	Y	6	5,1	T	7	7,0	C	7	0,7	Y	13	6,7	C	19	0,19	T	12	12,0	T	6	6,0	C	37	1,36	Y	9	1,8	C	10	0,10	T	8	8,0	Y	10	5,5	T	8
Marker39858	50.509	Cma_Chr02	3735557	C	A	A	12	0,12	C	26	26,0	M	9	3,6	C	6	6,0	A	20	0,20	M	10	2,8	A	29	0,29	C	12	12,0	C	39	39,0	A	13	0,13	M	32	15,17	A	26	0,26	C	34	34,0	M	29	12,17	C	26
Marker39653	50.509	Cma_Chr02	3701279	C	T	T	11	0,11	C	19	19,0	Y	15	7,8	C	12	11,1	T	67	0,67	Y	26	12,14	T	43	0,43	C	39	36,1	C	56	55,0	T	90	2,88	Y	49	24,25	T	21	0,21	C	62	62,0	Y	56	28,27	C	39
Marker39654	50.509	Cma_Chr02	3701321	C	A	A	11	0,11	C	17	17,0	M	15	7,8	M	12	11,1	A	67	0,67	M	26	12,14	A	43	0,43	C	39	37,1	C	56	56,0	A	90	2,88	M	49	24,25	A	21	0,21	C	62	62,0	M	56	28,28	C	37
Marker39652	50.509	Cma_Chr02	3701251	T	C	C	13	0,13	T	23	23,0	Y	13	7,6	T	12	11,1	C	67	0,67	Y	24	10,14	C	43	0,43	T	38	37,1	T	56	55,1	C	86	2,84	Y	49	24,25	C	20	0,20	T	61	61,0	Y	56	28,27	T	37
Marker39595	51.009	Cma_Chr02	3695612	G	A	A	19	2,17	G	18	18,0	R	25	11,14	R	7	6,1	A	91	0,91	R	30	16,14	A	92	1,91	G	44	43,1	G	50	47,3	A	58	0,58	R	60	21,39	A	56	0,56	G	94	93,1	R	73	28,44	G	40
Marker39280	51.009	Cma_Chr02	3661269	A	T	T	13	0,13	A	17	17,0	W	10	7,3	A	17	17,0	T	49	0,49	W	25	12,13	T	62	0,62	A	38	38,0	A	41	41,0	T	35	2,33	W	32	21,11	T	18	0,18	A	54	54,0	W	33	18,15	A	33
Marker40105	51.009	Cma_Chr02	3772252	G	T	T	15	0,15	G	14	14,0	K	13	8,5	G	31	31,0	T	40	0,40	K	16	9,7	T	48	0,48	G	16	16,0	G	15	15,0	T	26	0,26	K	19	10,9	T	32	0,32	G	45	45,0	K	53	24,29	G	38
Marker40104	51.009	Cma_Chr02	3771729	C	T	T	21	0,21	C	15	15,0	Y	24	15,9	C	25	23,1	T	86	1,85	Y	37	23,13	T	59	0,59	C	44	44,0	C	54	53,1	T	25	1,24	Y	61	30,31	T	26	0,26	C	71	71,0	Y	82	39,43	C	44
Marker39306	51.009	Cma_Chr02	3665048	C	A	A	14	0,14	C	12	12,0	M	34	25,9	C	20	20,0	A	28	0,28	M	13	4,9	A	19	1,18	C	33	33,0	C	41	41,0	A	32	0,32	M	51	29,22	A	13	0,13	C	26	25,1	M	21	13,8	C	18
Marker39912	51.009	Cma_Chr02	3741881	C	A	A	20	1,19	C	32	32,0	M	29	14,15	C	44	44,0	A	160	0,160	M	58	34,24	A	115	1,114	C	90	90,0	C	102	101,1	A	44	0,44	M	76	24,52	A	70	0,70	C	152	151,1	M	123	62,61	C	94
Marker39930	51.009	Cma_Chr02	3746606	T	C	C	12	0,12	T	14	14,0	Y	16	11,5	T	8	8,0	C	7	0,7	Y	7	2,5	C	18	0,18	T	16	16,0	T	21	20,0	C	29	0,29	Y	17	4,13	C	1	0,1	T	6	6,0	Y	32	19,13	T	14
Marker40170	52.009	Cma_Chr02	3790463	T	C	C	10	0,10	T	16	16,0	Y	10	8,2	T	13	13,0	C	15	0,15	Y	14	6,8	C	14	0,14	Y	9	8,1	T	36	36,0	C	34	0,34	Y	28	19,9	C	4	0,4	T	12	12,0	Y	26	19,7	T	12
Marker40279	52.509	Cma_Chr02	3808940	T	C	C	18	0,18	T	16	16,0	Y	8	3,5	T	9	9,0	C	31	0,31	Y	15	6,9	C	25	0,25	T	16	16,0	T	30	30,0	C	16	0,16	Y	41	20,21	C	10	0,9	T	30	30,0	Y	32	16,16	T	5
Marker40277	52.509	Cma_Chr02	3808753	T	A	A	19	1,18	T	14	14,0	W	8	3,5	T	7	7,0	A	29	0,29	W	14	5,9	A	22	0,22	T	16	16,0	T	30	30,0	A	14	0,14	W	39	20,19	A	9	0,9	T	29	29,0	W	31	15,16	T	5
Marker40282	52.509	Cma_Chr02	3809468	G	T	T	16	1,15	G	17	17,0	K	27	17,10	G	15	15,0	T	19	0,19	K	7	4,3	T	29	0,29	G	23	23,0	G	19	19,0	T	34	0,34	K	9	4,5	T	25	0,25	K	15	13,2	K	31	23,8	G	14
Marker40280	52.509	Cma_Chr02	3809259	A	G	G	13	0,13	A	23	23,0	R	27	17,10	A	15	15,0	G	19	0,19	R	7	4,3	G	29	0,29	A	23	23,0	A	19	19,0	G	34	0,34	R	9	4,5	G	25	0,25	R	15	13,2	R	31	23,8	A	14
Marker40195	52.509	Cma_Chr02	3793703	T	A	A	13	0,13	T	23	23,0	W	11	9,2	N	.	.	A	2	0,2	W	2	1,1	N	.	.	T	6	6,0	T	3	3,0	A	17	0,17	W	9	3,6	A	2	0,2	T	3	3,0	W	6	2,4	T	2
Marker40106	53.51	Cma_Chr02	3772298	G	A	A	15	0,15	G	12	12,0	R	5	1,4	G	12	12,0	A	8	0,8	R	7	6,1	A	17	0,17	G	6	6,0	G	9	9,0	A	4	0,4	R	4	3,1	A	15	0,15	G	25	25,0	R	32	13,19	G	12
Marker40539	54.01	Cma_Chr02	3850041	A	G	G	15	0,15	A	21	21,0	R	14	3,11	A	10	10,0	G	12	0,12	R	10	3,7	G	10	0,10	A	30	30,0	A	11	11,0	G	19	0,19	R	9	2,7	G	4	0,4	A	14	14,0	R	8	4,4	R	10
Marker40697	54.51	Cma_Chr02	3864412	G	A	A	12	0,12	G	16	16,0	R	14	5,9	G	16	16,0	A	25	0,25	R	30	16,14	A	35	0,35	G	18	17,1	G	39	38,1	A	26	0,26	R	33	17,16	A	14	0,14	G	39	38,1	R	39	21,18	R	19
Marker40700	54.51	Cma_Chr02	3864490	C	T	T	13	0,13	C	15	15,0	Y	14	5,9	C	16	16,0	T	25	0,25	Y	30	16,14	T	35	0,35	C	18	17,1	C	39	38,1	T	26	0,26	Y	33	17,16	T	14	0,14	C	39	38,1	Y	39	21,18	Y	19
Marker40699	54.51	Cma_Chr02	3864471	C	T	T	14	0,14	C	17	17,0	Y	14	5,9	C	16	16,0	T	25	0,25	Y	30	16,14	T	35	0,35	C	18	17,1	C	39	38,1	T	26	0,26	Y	33	17,16	T	14	0,14	C	39	38,1	Y	39	21,18	Y	19
Marker40698	54.51	Cma_Chr02	3864464	A	G	G	14	0,14	A	17	17,0	R	14	5,9	A	16	16,0	G	25	0,25	R	30	16,14	G	35	0,35	A	18	17,1	A	39	38,1	G	26	0,26	R	33	17,16	G	14	0,14	A	39	38,1	R	39	21,18	R	19
Marker40564	55.01	Cma_Chr02	3851534	C	T	T	15	0,15	C	17	17,0	Y	18	7,11	C	14	14,0	T	21	0,21	Y	10	9,1	T	39	1,38	C	15	15,0	C	6	6,0	T	48	0,48	Y	14	7,7	T	8	0,8	C	15	15,0	Y	19	11,8	Y	7
Marker40563	55.01	Cma_Chr02	3851479	T	C	C	14	0,14	T	17	17,0	Y	18	7,11	T	14	14,0	C	21	0,21	Y	10	9,1	C	39	1,38	T	15	15,0	T	6	6,0	C	48	0,48	Y	14	7,7	C	8	0,8	T	15	15,0	Y	19	11,8	Y	7
Marker41198	57.111	Cma_Chr02	3928551	A	G	G	15	0,15	A	24	24,0	R	16	6,10	N	.	.	G	28	0,28	R	3	2,1	G	18	0,18	A	20	20,0	A	4	4,0	G	9	0,9	R	9	4,5	G	23	0,23	A	22	22,0	G	21	1,20	R	6
Marker41196	57.111	Cma_Chr02	3928424	C	T	T	15	0,15	C	11	11,0	Y	16	6,10	N	.	.	T	28	0,28	Y	3	2,1	T	18	0,18	C	20	20,0	C	4	4,0	T	11	0,11	Y	9	5,4	T	24	1,23	C	22	22,0	T	21	1,20	Y	6
Marker41208	57.611	Cma_Chr02	3930422	A	G	G	15	0,15	A	16	16,0	R	8	4,4	A	10	10,0	G	17	0,17	R	6	3,3	G	13	0,13	R	4	3,1	A	7	7,0	G	33	2,31	R	12	3,9	G	6	0,6	A	21	21,0	A	4	4,0	R	18
Marker41102	57.611	Cma_Chr02	3915391	G	A	G	17	16,1	A	15	0,15	R	10	4,6	A	18	0,18	G	16	16,0	R	9	4,5	G	26	26,0	A	20	0,20	A	21	0,21	G	60	59,1	R	19	12,7	G	14	14,0	A	21	0,21	R	24	16,8	R	10
Marker41162	58.711	Cma_Chr02	3921952	C	T	T	17	1,16	C	12	12,0	Y	12	4,8	C	13	13,0	T	23	0,23	Y	21	7,14	T	21	0,21	C	37	37,0	C	40	40,0	T	10	0,10	Y	40	16,24	T	21	1,20	C	35	35,0	Y	42	28,14	Y	19
Marker41161	58.711	Cma_Chr02	3921914	C	A	A	18	1,17	C	10	10,0	M	12	4,8	C	13	13,0	A	23	0,23	M	21	7,14	A	21	0,21	C	37	37,0	C	40	40,0	A	10	0,10	M	40	16,24	A	21	1,20	C	35	35,0	M	42	28,14	M	19
Marker41160	58.711	Cma_Chr02	3921888	T	G	G	21	0,21	T	10	10,0	K	12	4,8	T	13	13,0	G	23	0,23	K	21	7,14	G	21	0,21	T	37	37,0	T	40	40,0	G	10	0,10	K	40	16,24	G	21	1,20	T	35	35,0	K	42	28,14	K	19
Marker41159	58.711	Cma_Chr02	3921724	T	G	G	18	0,18	T	15	15,0	K	12	4,8	T	13	13,0	G	23	0,23	K	21	7,14	G	21	0,21	T	37	36,1	T	38	38,0	G	10	0,10	K	40	16,24	G	21	1,20	T	35	35,0	K	42	28,14	K	19
Marker41158	59.211	Cma_Chr02	3921717	T	G	G	17	0,17	T	17	17,0	K	12	4,8	T	13	13,0	G	23	0,23	K	21	7,14	G	21	0,21	T	37	37,0	T	38	38,0	G	10	0,10	K	40	16,24	G	21	1,20	T	35	35,0	K	42	28,14	K	19
Marker41244	59.211	Cma_Chr02	3936122	C	G	G	20	0,20	C	10	10,0	G	4	0,3	C	1	1,0	G	7	0,7	S	12	5,7	G	6	0,6	C	6	6,0	C	9	9,0	G	25	0,25	S	8	4,4	G	3	0,3	C	21	21,0	S	21	6,15	S	10
Marker41451	67.091	Cma_Chr02	4714625	G	A	A	11	0,11	G	14	14,0	R	12	1,11	G	8	8,0	A	16	0,16	R	11	8,3	A	21	0,21	R	8	7,1	R	14	12,2	R	19	3,16	R	11	4,7	A	6	0,6	R	10	4,6	R	11	3,8	R	14
Marker41508	68.592	Cma_Chr02	4749071	C	G	G	13	0,13	C	15	15,0	S	17	13,4	C	14	14,0	G	9	0,9	S	10	5,5	G	17	0,17	S	4	1,3	S	27	23,4	S	17	13,4	S	16	9,7	G	4	0,4	S	21	13,8	S	38	19,19	S	11
Marker41504	71.41	Cma_Chr02	4737754	G	A	A	17	0,17	G	17	17,0	R	13	4,9	G	3	3,0	A	28	0,28	R	13	7,6	A	19	0,19	R	12	6,6	G	19	19,0	R	6	1,5	R	15	6,9	A	14	0,14	R	13	7,6	R	20	9,11	A	5
Marker42508	74.614	Cma_Chr02	5158278	A	T	A	818	766,52	T	754	2,752	W	56	35,21	T	15	1,14	A	71	71,0	W	51	23,28	A	99	99,0	W	51	31,20	T	35	1,34	W	74	44,29	A	93	92,1	A	36	36,0	W	42	24,18	W	6	1,5	A	20
Marker42454	74.614	Cma_Chr02	5153362	T	C	T	17	17,0	C	13	0,13	Y	38	33,5	C	32	12,20	T	27	27,0	Y	28	20,8	T	30	30,0	Y	48	38,10	C	70	37,33	Y	86	76,10	T	36	35,1	T	14	14,0	Y	63	50,13	Y	81	63,18	T	14
Marker43010	74.614	Cma_Chr02	5240617	G	A	G	22	21,1	A	18	0,18	R	12	6,6	A	12	0,12	G	14	14,0	R	18	4,13	G	4	4,0	R	22	12,10	A	28	0,28	R	36	16,20	G	9	9,0	G	13	13,0	R	70	33,37	R	24	13,11	G	14
Marker43009	74.614	Cma_Chr02	5240597	G	A	G	22	21,1	A	17	0,17	R	12	6,6	A	12	0,12	G	14	14,0	R	18	4,14	G	4	4,0	R	22	12,10	A	28	0,28	R	36	16,20	G	9	9,0	G	13	13,0	R	70	32,37	R	24	13,11	G	14
Marker43008	74.614	Cma_Chr02	5240587	T	G	T	19	18,1	G	17	0,17	K	12	6,6	G	12	0,12	T	14	14,0	K	18	4,14	T	4	4,0	K	22	12,10	G	28	0,28	K	36	16,20	T	9	9,0	T	13	13,0	K	70	33,37	K	24	13,11	T	14
Marker43007	74.614	Cma_Chr02	5240580	A	G	A	18	17,1	G	16	0,16	R	12	6,6	G	12	0,12	A	14	14,0	R	18	4,14	A	4	4,0	R	23	13,10	G	28	0,28	R	36	15,20	A	9	9,0	A	13	13,0	R	70	33,37	R	24	13,11	A	14
Marker43006	74.614	Cma_Chr02	5240564	G	A	G	17	16,1	A	17	0,17	R	12	6,6	A	12	0,12	G	14	14,0	R	18	4,13	G	4	4,0	R	23	13,10	A	28	0,28	R	36	16,20	G	9	9,0	G	13	13,0	R	70	32,38	R	24	13,10	G	14
Marker42251	74.614	Cma_Chr02	5088209	T	C	T	21	21,0	C	18	0,18	Y	15	7,8	C	3	0,3	T	6	6,0	T	4	4,0	T	16	16,0	Y	18	8,10	Y	10	1,9	Y	7	5,2	Y	19	16,3	T	7	7,0	Y	12	9,3	Y	11	8,3	T	1
Marker42598	75.114	Cma_Chr02	5184290	C	T	C	17	16,1	T	16	0,16	Y	28	9,19	T	9	0,9	C	37	37,0	Y	21	11,10	C	41	40,1	Y	21	15,6	T	46	2,44	Y	32	13,19	C	24	24,0	C	20	20,0	Y	45	17,28	Y	37	18,19	C	18
Marker42692	75.114	Cma_Chr02	5198300	C	T	C	15	14,1	T	15	0,15	Y	5	3,2	T	10	0,10	C	26	26,0	Y	15	12,3	C	27	27,0	Y	21	8,13	T	33	1,32	Y	16	9,7	C	22	22,0	C	17	16,1	Y	37	25,12	Y	23	15,8	C	9
Marker42576	75.114	Cma_Chr02	5181137	G	A	G	15	15,0	A	12	0,12	R	11	3,8	A	24	0,24	G	31	30,1	R	9	3,6	R	18	15,3	R	23	3,20	A	37	0,37	R	34	9,25	G	17	17,0	G	9	9,0	R	29	15,14	R	24	11,13	R	12
Marker42582	75.114	Cma_Chr02	5182436	A	T	A	18	17,1	T	14	0,14	W	10	5,5	T	17	0,17	A	25	25,0	W	28	7,21	A	20	20,0	W	28	13,15	T	42	0,42	W	41	16,25	A	24	24,0	A	9	9,0	W	35	17,18	W	20	7,13	A	13
Marker42344	75.114	Cma_Chr02	5125479	A	G	A	17	16,1	G	19	0,19	R	19	9,10	G	10	0,10	A	13	13,0	R	9	1,8	A	22	22,0	R	12	8,4	G	27	0,27	R	47	28,19	A	21	20,1	A	12	12,0	R	23	14,9	R	32	18,14	R	12
Marker42187	75.114	Cma_Chr02	5050799	C	T	C	21	20,1	T	14	0,14	Y	7	5,2	T	11	0,11	C	12	12,0	Y	14	6,8	C	10	10,0	Y	4	2,2	T	17	0,17	Y	8	6,2	C	17	17,0	C	16	16,0	Y	13	7,6	Y	11	6,5	C	6
Marker41850	75.114	Cma_Chr02	4929977	T	C	T	16	16,0	C	15	0,15	Y	10	6,4	C	6	0,6	T	17	17,0	Y	14	10,4	T	17	17,0	C	2	0,2	C	30	0,30	Y	5	1,4	T	13	13,0	T	6	6,0	Y	10	3,7	Y	14	4,10	T	11
Marker41849	75.114	Cma_Chr02	4929967	A	C	A	17	17,0	C	15	0,15	M	10	6,4	C	6	0,6	A	17	17,0	M	13	10,3	A	17	17,0	C	2	0,2	C	30	0,30	M	5	1,4	A	13	13,0	A	6	6,0	M	10	3,7	M	14	4,10	A	11
Marker41848	75.114	Cma_Chr02	4929821	A	G	A	22	22,0	G	24	0,24	R	10	6,4	G	6	0,6	A	17	17,0	R	14	10,3	A	17	17,0	G	2	0,2	G	31	0,31	R	5	1,4	A	13	13,0	A	6	6,0	R	10	3,7	R	15	4,11	A	11
Marker42412	75.614	Cma_Chr02	5147698	G	A	G	19	18,1	A	14	0,14	R	18	5,13	A	6	0,6	G	53	52,1	R	16	10,6	G	36	35,1	R	25	10,15	A	40	1,39	R	94	40,54	G	66	64,1	G	18	18,0	R	58	34,24	R	50	26,24	R	33
Marker42718	75.614	Cma_Chr02	5201788	A	G	A	15	14,1	G	11	0,11	R	34	14,20	G	38	0,37	A	155	153,2	R	88	40,48	A	120	120,0	R	97	45,52	G	79	1,77	R	75	43,32	A	106	104,2	A	76	74,2	R	141	72,69	R	136	69,67	A	86
Marker43180	76.114	Cma_Chr02	5346495	T	C	C	16	0,16	T	16	16,0	Y	28	16,12	T	6	6,0	C	36	0,36	Y	17	6,11	C	37	0,37	Y	16	4,12	T	27	27,0	Y	41	12,29	C	29	0,29	C	28	0,28	Y	29	10,19	Y	21	4,17	C	30
Marker43015	76.114	Cma_Chr02	5240976	C	T	C	15	14,1	T	13	0,13	Y	14	8,6	T	14	0,14	C	27	26,1	Y	12	5,7	C	19	18,0	Y	13	8,5	T	16	1,15	Y	25	15,10	C	36	36,0	C	42	42,0	Y	36	22,14	Y	34	16,18	C	11
Marker43014	76.114	Cma_Chr02	5240966	A	C	A	16	15,1	C	12	0,12	M	14	8,6	C	14	0,14	A	27	26,1	M	12	5,7	A	19	19,0	M	13	8,5	C	16	1,14	M	25	15,10	A	36	36,0	A	42	42,0	M	36	22,14	M	34	16,18	A	11
Marker43459	79.721	Cma_Chr02	5516454	T	G	G	15	1,14	T	13	13,0	K	27	16,11	T	8	8,0	G	18	0,18	T	12	12,0	G	44	0,44	K	13	9,4	T	17	17,0	K	39	22,17	G	22	0,22	K	19	8,11	K	25	10,15	G	40	0,40	G	18
Marker43307	81.221	Cma_Chr02	5494993	A	G	G	14	0,14	A	23	22,1	R	28	8,20	A	17	17,0	G	26	0,26	A	16	16,0	G	19	0,19	R	24	16,8	A	15	15,0	R	35	17,18	G	35	0,35	A	8	8,0	R	17	9,8	G	10	0,10	G	11
Marker43743	83.322	Cma_Chr02	5614375	C	T	C	19	19,0	T	15	0,15	Y	11	6,5	Y	12	1,11	C	38	37,1	T	16	0,16	Y	28	18,10	Y	27	12,15	T	25	0,25	Y	14	5,9	C	31	31,0	Y	13	4,9	Y	20	10,10	C	9	9,0	C	6
Marker44034	84.823	Cma_Chr02	5668028	G	C	G	20	20,0	C	15	0,15	S	21	14,7	C	14	0,14	G	35	35,0	C	12	0,12	S	27	12,15	S	23	14,9	C	32	0,32	S	20	11,9	G	27	27,0	S	24	13,11	S	23	13,10	G	40	39,1	G	13
Marker44183	84.823	Cma_Chr02	5688562	T	G	G	19	1,18	T	15	15,0	K	25	10,15	T	14	14,0	G	35	0,35	T	25	25,0	K	32	21,11	K	39	17,22	T	30	29,1	K	25	9,16	G	42	0,42	K	18	7,11	K	40	20,20	G	56	0,56	G	21
Marker44567	85.323	Cma_Chr02	5770815	C	T	T	16	1,15	C	17	17,0	Y	31	15,16	C	39	39,0	T	69	0,69	C	35	35,0	Y	30	15,15	Y	52	35,17	C	61	60,1	Y	38	15,23	T	70	0,70	Y	27	14,13	Y	83	52,31	T	54	0,54	T	39
Marker44566	85.323	Cma_Chr02	5770787	C	T	T	17	1,16	C	18	18,0	Y	31	15,16	C	39	39,0	T	68	0,68	C	35	34,0	Y	30	15,15	Y	51	35,16	C	60	59,0	Y	38	15,23	T	70	0,70	Y	27	14,13	Y	81	52,29	T	53	0,53	T	39
Marker44485	85.323	Cma_Chr02	5747680	A	T	T	21	0,21	A	23	23,0	W	7	4,3	A	3	3,0	T	10	0,10	A	10	10,0	W	19	8,11	W	14	8,6	A	21	21,0	W	59	42,17	T	12	0,12	W	7	1,6	W	22	2,20	T	23	0,23	T	7
Marker44856	85.823	Cma_Chr02	5827579	C	T	C	15	15,0	T	17	0,17	Y	26	16,10	T	17	0,17	C	82	82,0	T	30	2,28	Y	63	33,30	Y	47	30,17	T	63	0,63	Y	51	19,32	C	68	68,0	Y	19	10,9	Y	100	40,60	C	80	80,0	C	68
Marker44989	86.823	Cma_Chr02	5899806	A	T	T	12	0,12	A	11	11,0	W	8	6,2	A	9	9,0	T	43	0,43	A	8	8,0	W	11	4,7	W	12	3,9	A	48	48,0	T	21	0,21	T	58	0,58	T	14	0,14	W	24	5,19	T	53	0,53	T	34
Marker45048	87.323	Cma_Chr02	5908543	A	T	T	11	0,11	A	10	10,0	W	16	7,9	A	6	6,0	T	16	0,16	A	11	11,0	W	28	18,10	W	16	4,12	A	13	13,0	T	18	0,18	T	31	0,31	W	6	4,2	W	30	15,15	T	32	0,32	T	8
Marker44930	87.823	Cma_Chr02	5873722	G	A	A	15	1,14	G	21	21,0	R	3	2,1	G	15	15,0	A	21	0,21	G	14	14,0	R	17	10,7	R	14	6,8	G	18	18,0	A	18	0,18	R	11	1,10	R	15	7,8	R	15	3,12	A	23	0,23	A	7
Marker44929	87.823	Cma_Chr02	5873688	T	C	C	16	1,15	T	18	17,1	Y	3	2,1	T	15	15,0	C	20	0,20	T	14	14,0	Y	17	10,7	Y	14	6,8	T	18	18,0	C	18	0,18	Y	11	1,10	Y	15	7,8	Y	15	3,12	C	23	0,23	C	7
Marker45484	89.323	Cma_Chr02	6111891	A	C	C	18	0,18	A	10	10,0	M	12	9,3	A	5	5,0	C	24	0,24	A	11	11,0	M	25	10,15	M	21	12,9	A	17	17,0	C	25	0,25	C	28	0,28	M	12	5,7	M	28	17,11	C	21	1,20	C	18
Marker45682	96.37	Cma_Chr02	6410157	T	C	C	13	0,13	T	14	14,0	C	17	1,16	T	14	14,0	T	3	3,0	T	10	10,0	Y	16	11,5	T	15	15,0	T	15	15,0	C	55	0,55	C	13	0,13	Y	15	5,10	Y	16	9,7	C	8	0,8	C	10
Marker45678	98.972	Cma_Chr02	6409633	A	T	T	18	1,17	A	13	13,0	T	7	0,7	A	6	6,0	W	5	3,2	A	11	11,0	W	11	3,8	W	11	6,5	A	22	22,0	T	12	0,12	T	14	0,14	W	22	5,17	W	3	2,1	T	7	0,7	T	6
Marker46238	101.574	Cma_Chr02	6544823	A	T	T	13	0,13	A	13	13,0	T	23	0,23	A	10	10,0	W	10	6,4	A	8	8,0	W	14	8,6	W	8	1,7	A	20	20,0	W	17	7,9	T	14	0,14	W	3	1,2	W	12	7,5	T	13	0,13	T	15
Marker46239	101.574	Cma_Chr02	6544850	G	T	T	12	0,12	G	17	17,0	T	23	0,23	G	10	10,0	K	10	6,4	G	8	8,0	K	14	8,6	K	8	1,7	G	20	20,0	K	17	7,10	T	14	0,14	K	3	1,2	K	12	7,5	T	13	0,13	T	15
Marker45835	102.575	Cma_Chr02	6469091	T	C	C	18	1,17	T	14	14,0	C	27	0,27	T	23	23,0	Y	30	13,17	T	7	6,0	Y	66	18,48	Y	50	10,40	T	29	29,0	Y	19	3,16	C	79	0,79	Y	22	3,19	Y	52	7,45	C	87	0,87	C	51
Marker46125	102.575	Cma_Chr02	6518788	G	T	T	14	1,13	G	17	17,0	N	.	.	G	6	6,0	K	19	13,6	G	1	1,0	K	15	8,7	K	19	14,5	G	13	12,0	K	6	2,4	T	10	0,10	N	.	.	K	23	10,13	T	24	1,23	T	17
Marker46606	103.075	Cma_Chr02	6634239	G	A	G	11	10,1	A	13	0,13	G	11	11,0	A	6	0,6	R	20	10,10	A	6	0,6	R	9	4,5	G	14	13,1	A	24	0,24	R	12	9,3	G	18	18,0	G	6	6,0	R	10	8,2	G	8	8,0	G	13
Marker46478	103.075	Cma_Chr02	6615477	A	G	A	17	17,0	G	19	0,19	A	15	15,0	G	26	0,26	R	85	40,44	G	32	1,31	R	64	34,30	R	54	29,25	R	17	3,14	R	9	4,5	A	75	75,0	R	35	22,13	R	90	47,43	A	20	20,0	A	12
Marker46321	103.075	Cma_Chr02	6560627	T	C	C	18	0,18	T	21	21,0	C	7	0,7	Y	4	3,1	Y	12	7,5	T	5	5,0	Y	23	9,14	Y	12	3,9	T	17	17,0	Y	9	1,8	C	17	0,17	Y	5	2,3	Y	12	4,8	C	15	0,15	C	23
Marker46320	103.075	Cma_Chr02	6560600	T	A	A	17	0,17	T	22	22,0	A	7	0,7	W	4	3,1	W	12	7,5	T	5	5,0	W	23	9,14	W	12	3,9	T	17	17,0	W	9	1,8	A	17	0,17	W	5	2,3	W	12	4,8	A	15	0,15	A	23
Marker46319	103.075	Cma_Chr02	6560550	T	G	G	18	1,17	T	17	17,0	G	7	0,7	K	4	3,1	K	12	7,5	T	5	5,0	K	23	9,14	K	12	3,9	T	17	17,0	K	9	1,8	G	17	0,17	K	5	2,3	K	12	4,8	G	15	0,15	G	23
Marker46325	103.075	Cma_Chr02	6562350	G	A	A	18	1,17	G	19	19,0	A	30	0,30	G	11	11,0	R	65	28,37	G	27	27,0	R	40	26,13	R	24	17,7	G	59	59,0	R	60	33,27	A	31	0,31	R	31	6,25	R	57	31,26	A	45	0,45	A	37
Marker45840	103.075	Cma_Chr02	6470477	T	A	A	15	0,15	T	15	15,0	A	35	0,35	T	20	20,0	W	54	28,26	T	46	46,0	W	28	13,15	W	31	17,14	T	45	45,0	W	21	13,8	A	66	0,66	W	48	32,15	W	52	21,31	A	59	0,59	A	37
Marker46414	103.575	Cma_Chr02	6597786	A	G	A	15	14,1	G	13	0,13	A	2	2,0	G	2	0,2	R	18	10,8	G	8	0,8	R	5	2,3	R	16	6,10	G	12	0,12	G	6	0,6	A	17	17,0	G	3	0,3	R	16	7,9	A	18	16,2	A	15
Marker46919	104.075	Cma_Chr02	6718358	G	A	G	15	14,1	A	12	0,12	G	18	18,0	A	12	0,12	R	23	12,11	A	10	0,10	R	13	5,8	R	15	6,9	A	6	0,6	R	5	4,1	G	11	11,0	R	12	5,7	R	22	8,14	G	15	15,0	G	11
Marker47048	104.575	Cma_Chr02	6783669	C	T	C	15	14,1	T	21	0,21	C	3	3,0	N	.	.	Y	13	2,11	T	3	0,3	T	6	0,6	Y	8	4,4	T	4	0,4	Y	14	3,11	C	4	4,0	T	3	0,3	Y	7	5,2	C	7	7,0	Y	3
Marker46997	104.575	Cma_Chr02	6755866	C	T	C	20	19,1	T	13	0,13	C	17	17,0	T	11	0,11	Y	88	53,35	T	21	0,21	Y	39	21,18	Y	43	25,18	T	46	0,46	Y	44	23,21	C	46	46,0	C	17	16,1	Y	49	17,32	C	60	59,1	C	36
Marker46996	104.575	Cma_Chr02	6755855	G	A	G	20	19,1	A	12	0,12	G	17	17,0	A	11	0,11	R	88	52,35	A	21	0,21	R	39	21,18	R	43	25,18	A	46	0,46	R	44	23,21	G	46	46,0	G	17	16,1	R	49	17,32	G	58	58,0	G	34
Marker46866	104.575	Cma_Chr02	6712127	T	A	T	11	11,0	A	14	0,14	T	9	8,1	A	5	0,5	W	6	2,4	W	7	1,6	W	14	10,4	T	1	1,0	A	1	0,1	W	14	9,4	T	7	7,0	W	5	4,1	T	2	2,0	T	9	9,0	N	.
Marker46966	104.575	Cma_Chr02	6751059	C	T	C	16	16,0	T	27	1,26	C	7	7,0	T	7	0,7	Y	7	1,6	N	.	.	C	4	4,0	Y	5	1,4	T	14	0,14	Y	23	10,13	C	9	9,0	N	.	.	T	9	0,9	C	3	3,0	C	3
Marker47037	104.575	Cma_Chr02	6777154	T	C	T	14	14,0	C	12	0,12	T	23	23,0	C	30	0,30	Y	92	47,45	C	31	0,31	Y	62	26,36	Y	54	24,30	C	77	0,77	Y	25	13,12	T	67	67,0	Y	41	21,20	Y	75	43,32	T	71	70,1	T	30
Marker46967	104.575	Cma_Chr02	6751078	C	G	C	14	14,0	G	28	1,27	C	7	7,0	G	7	0,7	S	7	1,6	N	.	.	C	4	4,0	S	5	1,4	G	14	0,14	S	23	10,13	C	9	9,0	N	.	.	G	9	0,9	C	3	3,0	C	3
Marker47133	107.378	Cma_Chr02	6992952	C	G	C	19	19,0	G	13	0,13	C	6	6,0	S	6	1,5	S	13	4,9	G	3	1,2	S	17	6,11	S	11	6,5	S	9	3,6	C	1	1,0	C	9	9,0	C	13	13,0	S	10	4,6	C	16	16,0	C	9
Marker47229	108.478	Cma_Chr02	7155388	A	C	A	15	15,0	C	17	0,17	A	1	1,0	M	7	5,2	M	10	5,5	C	5	0,5	M	12	4,8	M	5	3,2	M	11	9,2	C	7	0,7	A	5	5,0	A	8	8,0	C	1	0,1	A	5	5,0	A	5
Marker47233	108.978	Cma_Chr02	7155601	T	A	T	14	14,0	A	15	0,15	T	1	1,0	W	7	5,2	W	11	5,6	A	5	0,5	W	12	4,8	W	5	3,2	W	11	9,2	A	7	0,7	T	5	5,0	T	8	8,0	A	1	0,1	T	5	5,0	T	5
Marker47232	108.978	Cma_Chr02	7155578	T	C	T	15	15,0	C	16	0,16	T	1	1,0	Y	7	5,2	Y	11	5,6	C	5	0,5	Y	12	4,8	Y	5	3,2	Y	11	9,2	C	7	0,7	T	5	5,0	T	8	8,0	C	1	0,1	T	5	5,0	T	5
Marker47264	110.078	Cma_Chr02	7244573	T	A	A	19	1,18	T	15	15,0	A	8	0,8	W	20	9,11	W	21	15,6	T	18	18,0	W	11	2,8	W	10	7,3	W	26	15,11	W	10	6,4	A	13	0,13	W	6	1,5	W	19	15,4	A	10	0,10	A	3
Marker47263	110.078	Cma_Chr02	7244545	C	G	G	17	1,16	C	18	18,0	G	8	0,8	S	20	9,11	S	19	13,6	C	17	17,0	S	11	2,9	S	10	7,3	S	23	12,11	S	10	6,4	G	13	0,13	S	6	1,5	S	19	15,4	G	10	0,10	G	3
Marker47366	112.179	Cma_Chr02	7323187	A	C	C	14	0,14	A	14	14,0	C	26	0,26	M	24	12,12	M	41	16,25	A	26	26,0	M	23	4,19	M	44	22,22	C	31	0,31	M	25	20,5	C	43	0,43	C	16	0,16	M	47	18,29	C	34	0,34	C	19
Marker47720	113.78	Cma_Chr02	7481872	T	G	G	18	0,18	T	14	14,0	G	24	0,24	K	14	8,6	K	40	15,25	T	34	34,0	K	38	23,15	K	19	13,6	G	27	0,27	K	29	9,20	G	38	0,38	G	18	0,18	K	32	8,24	G	49	1,48	G	10
Marker47708	113.78	Cma_Chr02	7478697	A	T	T	18	0,18	A	15	15,0	T	30	0,30	W	33	20,13	W	103	54,49	A	18	18,0	W	39	22,17	W	39	14,25	T	59	0,59	W	45	24,21	T	101	1,100	T	45	0,45	W	85	37,48	T	81	0,81	T	49
Marker47707	113.78	Cma_Chr02	7478688	G	A	A	18	0,18	G	17	17,0	A	30	0,30	R	33	20,13	R	103	54,48	G	18	18,0	R	42	23,19	R	39	15,24	A	59	0,59	R	45	24,21	A	101	1,100	A	45	0,45	R	85	37,48	A	80	0,80	A	49
Marker47721	114.28	Cma_Chr02	7482024	A	C	C	22	0,22	A	21	21,0	C	24	0,24	M	14	8,6	M	38	14,24	A	34	34,0	M	38	23,15	M	19	13,6	C	27	0,27	M	29	9,20	C	38	0,38	C	18	0,18	M	32	8,24	C	49	2,47	C	10
Marker48015	115.88	Cma_Chr02	7693608	A	G	A	12	12,0	G	10	0,10	A	30	30,0	R	9	2,7	R	24	11,13	G	39	0,39	R	46	28,18	R	23	10,13	A	45	45,0	R	49	28,21	A	39	38,1	A	20	20,0	R	23	15,8	A	13	13,0	R	25
Marker47989	115.88	Cma_Chr02	7690127	G	A	A	17	1,16	G	16	16,0	A	25	0,25	R	12	4,8	R	74	37,37	G	50	47,3	R	60	44,16	R	66	46,20	A	96	2,94	G	67	64,3	A	38	0,38	A	37	2,35	R	69	53,16	A	93	1,92	A	43
Marker48629	120.09	Cma_Chr02	7856691	C	T	C	12	11,1	T	16	0,16	C	8	8,0	Y	15	10,5	Y	9	3,6	T	17	0,17	Y	26	6,20	Y	19	11,8	C	17	17,0	Y	41	16,25	C	13	13,0	C	4	4,0	Y	6	1,5	C	10	10,0	C	11
Marker48681	120.09	Cma_Chr02	7864135	C	A	C	15	15,0	A	11	0,11	M	9	8,1	M	15	11,4	M	27	13,14	A	11	0,11	M	25	16,9	M	10	4,6	C	12	12,0	M	44	20,24	M	12	11,1	C	5	5,0	M	12	5,7	M	11	10,1	C	10
Marker48764	121.09	Cma_Chr02	7891935	G	C	G	27	26,1	C	17	0,17	G	16	16,0	S	23	14,9	S	23	18,5	C	14	0,14	C	10	0,10	S	36	23,13	G	34	34,0	S	8	4,4	G	73	73,0	G	11	11,0	S	22	12,10	G	17	16,1	G	28
Marker48904	122.091	Cma_Chr02	7932656	G	A	A	17	0,17	G	24	24,0	A	7	0,7	R	8	4,4	G	6	6,0	G	1	1,0	G	23	23,0	R	9	6,3	A	8	0,8	R	30	13,17	A	14	0,14	A	3	0,3	R	9	3,6	A	5	0,5	A	6
Marker49310	122.091	Cma_Chr02	8045317	G	A	G	20	20,0	A	18	0,18	G	15	15,0	R	6	1,5	G	16	16,0	A	9	0,9	A	6	0,6	R	7	3,4	G	15	15,0	R	18	6,12	G	8	8,0	R	3	2,1	R	14	4,10	G	5	5,0	G	10
Marker49532	122.591	Cma_Chr02	8082271	T	C	C	11	0,11	T	16	16,0	C	15	0,15	Y	12	11,1	Y	9	7,2	T	8	8,0	T	12	12,0	Y	16	7,9	C	26	1,25	Y	18	11,7	C	21	0,21	C	11	0,11	Y	17	9,8	C	17	0,17	C	5
Marker49635	123.091	Cma_Chr02	8134579	A	C	C	11	0,11	A	18	18,0	C	12	0,12	M	20	13,7	M	28	23,5	A	19	19,0	A	30	30,0	M	15	10,5	C	11	0,11	M	17	10,7	C	17	1,16	C	16	1,15	M	33	24,9	C	25	0,25	C	6
Marker49181	123.591	Cma_Chr02	8024798	C	G	G	17	0,17	C	16	16,0	G	34	1,33	S	31	15,16	S	105	46,59	C	38	37,1	C	112	112,0	S	73	32,41	G	96	1,95	S	40	23,17	G	61	1,60	G	35	1,34	S	116	64,51	G	158	1,157	G	53
Marker48909	123.591	Cma_Chr02	7934415	A	G	A	18	17,1	G	15	0,15	A	11	11,0	R	8	2,6	R	22	11,11	G	12	0,12	G	15	0,15	R	16	2,14	A	20	20,0	R	24	16,8	A	15	15,0	R	9	8,1	R	5	4,1	A	9	9,0	A	11
Marker49251	123.591	Cma_Chr02	8036479	T	C	C	23	0,23	T	16	16,0	C	45	0,45	Y	34	19,15	Y	177	94,81	T	82	82,0	T	143	142,1	Y	73	26,47	C	107	1,105	Y	61	30,31	C	76	1,75	C	74	1,72	Y	165	92,72	C	109	0,109	C	67
Marker48962	123.591	Cma_Chr02	7948772	T	A	T	13	13,0	A	19	0,19	T	2	2,0	W	16	11,5	W	4	3,1	A	10	0,10	A	13	0,13	W	4	3,1	T	10	10,0	W	19	10,9	T	7	7,0	T	1	1,0	A	2	0,2	W	8	7,1	T	2
Marker49075	123.591	Cma_Chr02	7981579	A	G	A	16	16,0	G	10	0,10	A	15	14,1	R	9	5,4	R	22	8,14	R	14	1,13	G	52	0,52	R	23	10,13	A	21	20,1	R	12	7,5	A	37	36,1	R	10	9,1	R	33	21,12	A	40	40,0	R	10
Marker49074	123.591	Cma_Chr02	7981524	T	C	T	20	19,1	C	11	0,11	T	15	15,0	Y	9	5,4	Y	22	8,14	Y	15	1,14	C	48	0,48	Y	24	10,14	T	21	20,1	Y	12	7,5	T	37	36,1	Y	10	9,1	Y	33	21,12	T	41	41,0	Y	10
Marker49250	124.091	Cma_Chr02	8036282	T	A	A	14	0,14	T	21	21,0	A	45	0,45	W	33	18,15	W	177	96,81	T	82	82,0	T	143	142,1	W	73	26,47	A	106	1,105	W	61	30,31	A	77	1,76	A	74	1,73	W	165	92,73	A	113	0,113	A	67
Marker49039	125.091	Cma_Chr02	7969869	G	A	A	17	0,17	G	15	15,0	A	10	0,10	A	5	0,5	R	26	13,13	R	6	5,1	G	23	23,0	R	16	4,12	A	20	0,20	R	17	6,11	A	17	0,17	A	11	0,11	R	29	12,17	A	19	0,19	A	7
Marker49664	126.091	Cma_Chr02	8139171	G	A	A	11	0,11	G	22	22,0	A	16	0,16	R	14	4,10	R	30	3,27	G	7	7,0	G	30	29,1	R	16	3,13	A	49	0,49	R	22	8,14	A	51	0,51	A	17	0,17	R	28	9,19	A	26	0,26	A	24
Marker49663	126.091	Cma_Chr02	8139146	A	C	C	10	0,10	A	18	18,0	C	16	0,16	M	14	4,10	M	30	3,27	A	7	7,0	A	30	29,1	M	16	3,13	C	49	0,49	M	22	8,14	C	51	0,50	C	17	0,17	M	28	9,19	C	26	0,26	C	24
Marker49531	126.091	Cma_Chr02	8082228	G	A	A	13	0,13	G	16	16,0	A	24	0,24	R	17	10,7	R	50	22,28	G	26	26,0	G	48	48,0	R	20	8,12	A	44	0,44	R	29	21,8	A	18	0,18	R	11	1,10	R	25	18,7	A	48	1,47	A	20
Marker49990	128.192	Cma_Chr02	8202684	C	G	G	11	0,11	C	22	22,0	G	15	0,15	S	16	8,8	C	36	35,1	C	13	13,0	C	27	26,1	S	25	11,14	G	24	0,24	S	28	12,16	G	24	0,24	G	21	0,20	S	30	17,13	G	25	0,25	G	24
Marker50065	128.692	Cma_Chr02	8221122	C	T	T	13	0,13	C	12	12,0	T	14	0,14	Y	18	8,10	C	56	56,0	C	27	27,0	C	65	63,2	Y	62	40,21	T	51	0,51	Y	28	16,12	T	69	0,69	T	20	1,19	Y	39	17,22	T	47	0,47	T	33
Marker49779	128.692	Cma_Chr02	8169077	G	C	C	18	1,17	G	15	15,0	C	3	0,3	G	2	2,0	G	10	10,0	G	3	3,0	G	5	5,0	G	3	3,0	C	14	0,14	S	16	11,5	C	11	0,11	C	3	0,3	S	16	13,3	C	16	0,16	C	10
Marker50116	129.192	Cma_Chr02	8237626	G	C	G	13	13,0	C	11	0,11	G	21	21,0	S	8	3,5	C	32	0,32	C	14	0,14	C	48	0,48	S	22	12,10	G	17	17,0	S	18	12,6	G	24	24,0	S	13	12,1	G	11	11,0	G	24	24,0	G	35
Marker50410	130.192	Cma_Chr02	8314643	T	C	C	19	1,18	T	18	18,0	C	7	0,7	Y	9	3,6	T	17	17,0	T	7	7,0	T	14	14,0	Y	7	2,5	C	13	0,13	Y	13	8,5	C	26	0,26	C	4	0,4	Y	14	4,10	Y	9	1,8	C	10
Marker50517	130.192	Cma_Chr02	8342976	C	T	C	16	16,0	T	22	0,22	Y	8	7,1	Y	7	3,4	T	9	0,9	T	13	0,13	T	16	0,16	Y	10	8,2	C	14	14,0	Y	12	5,7	C	23	23,0	C	4	4,0	Y	14	7,7	C	14	14,0	C	5
Marker50683	130.692	Cma_Chr02	8377678	A	G	A	13	13,0	G	13	0,13	A	28	28,0	R	36	21,15	G	57	2,55	G	22	0,22	G	47	0,47	R	34	14,20	A	55	55,0	R	57	29,28	A	78	77,1	A	29	29,0	R	49	21,28	A	57	57,0	A	43
Marker50518	130.692	Cma_Chr02	8343063	A	C	A	13	13,0	C	27	0,27	A	30	30,0	M	21	11,10	C	53	0,53	C	17	0,17	C	66	0,66	M	33	29,4	A	55	55,0	M	38	21,17	A	59	59,0	A	22	22,0	M	32	21,11	A	65	64,1	A	19
Marker50523	130.692	Cma_Chr02	8343833	A	T	A	15	15,0	T	25	0,25	A	21	21,0	W	29	8,21	T	34	0,34	T	20	0,20	T	15	0,14	W	15	6,9	A	51	51,0	W	39	14,25	A	28	26,1	A	8	8,0	W	13	8,5	A	25	24,1	A	15
Marker50684	130.692	Cma_Chr02	8377690	A	G	A	12	12,0	G	15	0,15	A	28	28,0	R	36	21,15	G	57	2,55	G	22	0,22	G	47	0,47	R	34	14,20	A	55	55,0	R	57	29,28	A	78	77,1	A	29	29,0	R	49	21,28	A	57	57,0	A	43
Marker50184	132.193	Cma_Chr02	8252731	A	G	A	20	20,0	G	22	0,22	A	12	12,0	G	1	0,1	G	14	0,14	G	1	0,1	G	15	0,15	R	16	4,12	A	6	6,0	A	1	1,0	R	13	12,1	A	11	11,0	R	22	6,16	A	5	5,0	A	4
Marker50183	132.193	Cma_Chr02	8252689	G	A	A	17	0,17	G	25	25,0	A	12	0,12	G	1	1,0	G	14	14,0	G	1	1,0	G	15	15,0	R	16	12,4	A	6	0,6	N	.	.	R	13	1,12	A	11	0,11	R	22	16,6	A	5	0,5	A	3
Marker50806	133.193	Cma_Chr02	8406559	A	T	A	17	16,1	T	15	0,15	A	11	11,0	W	4	2,2	T	14	0,14	T	13	0,12	T	15	0,15	W	13	5,8	A	16	16,0	W	14	8,6	A	13	13,0	A	3	3,0	T	9	0,9	A	18	18,0	A	7
Marker50360	133.693	Cma_Chr02	8298005	A	G	A	23	23,0	G	21	0,21	A	11	11,0	R	9	5,4	G	17	0,17	G	17	0,17	G	5	0,5	R	11	6,5	A	10	10,0	R	12	5,7	A	1	1,0	A	14	13,1	R	4	1,3	A	8	8,0	A	10
Marker50359	134.193	Cma_Chr02	8297998	C	T	C	23	23,0	T	21	0,21	C	11	11,0	Y	9	5,4	T	17	0,17	T	17	0,17	T	5	0,5	Y	11	6,5	C	10	10,0	Y	12	5,7	C	1	1,0	Y	14	13,1	Y	4	1,3	C	8	8,0	C	10
Marker51145	134.693	Cma_Chr02	8568960	A	T	T	21	1,20	A	19	19,0	T	11	0,11	W	8	2,6	A	26	26,0	A	17	17,0	A	20	20,0	W	16	6,10	T	10	0,10	W	13	6,7	T	5	0,5	T	22	1,21	W	25	13,12	T	28	0,28	W	11
Marker51587	137.897	Cma_Chr02	8866754	T	A	A	11	0,11	T	13	13,0	A	18	0,18	W	22	12,10	T	38	38,0	T	27	27,0	T	23	23,0	T	36	36,0	A	40	0,39	W	65	36,29	A	47	1,46	A	23	1,22	W	41	14,27	A	54	0,54	W	15
Marker51817	141.001	Cma_Chr02	9186336	C	T	C	21	20,1	T	21	0,21	C	11	11,0	Y	14	11,3	T	7	0,7	T	12	0,12	T	17	0,17	T	4	0,4	C	38	38,0	Y	14	2,12	C	27	27,0	C	3	3,0	Y	31	21,10	Y	12	11,1	Y	18
Marker51816	141.001	Cma_Chr02	9186313	G	A	G	22	21,1	A	20	0,20	G	11	11,0	R	14	11,3	A	7	0,7	A	9	0,9	A	17	0,17	A	4	0,4	G	38	38,0	R	13	2,11	G	27	27,0	G	3	3,0	R	31	21,10	R	12	11,1	R	17
Marker51815	141.001	Cma_Chr02	9186301	G	T	G	24	23,1	T	23	0,23	G	11	11,0	K	14	11,3	T	7	0,7	T	9	0,9	T	17	0,17	T	4	0,4	G	38	38,0	K	13	2,11	G	27	27,0	G	3	3,0	K	31	21,10	K	12	11,1	K	17
Marker51995	143.102	Cma_Chr02	9319710	G	A	A	10	0,10	G	22	22,0	A	6	0,6	R	16	8,8	G	8	8,0	G	4	4,0	G	7	7,0	G	13	13,0	A	19	0,19	R	9	7,2	A	9	0,9	A	6	0,6	R	8	4,4	N	.	.	R	5
Marker51969	143.102	Cma_Chr02	9316924	C	T	T	18	1,17	C	18	18,0	T	22	0,22	Y	12	2,10	C	20	20,0	C	8	8,0	C	14	13,1	C	8	8,0	T	29	0,29	Y	35	22,13	T	22	0,22	T	9	0,9	Y	9	4,5	T	13	0,13	C	14
Marker51979	143.102	Cma_Chr02	9318105	C	G	G	14	0,14	C	15	15,0	G	30	0,30	S	10	7,3	C	29	29,0	C	23	22,1	C	13	13,0	C	17	17,0	G	15	0,15	S	21	15,6	G	30	0,30	G	11	0,11	S	25	18,7	G	25	0,25	S	6
Marker51964	143.102	Cma_Chr02	9314660	A	T	T	15	0,15	A	10	10,0	T	1	0,1	W	8	3,5	A	11	11,0	A	8	8,0	A	20	20,0	A	10	10,0	T	20	0,20	W	14	9,5	T	25	0,25	T	12	0,12	W	26	12,14	T	21	0,21	W	9
Marker51961	143.603	Cma_Chr02	9297788	A	G	G	15	0,15	A	16	16,0	G	19	0,19	R	3	1,2	A	16	16,0	A	7	7,0	A	15	15,0	A	13	13,0	G	40	1,39	R	10	7,3	G	13	0,13	R	9	1,8	R	30	22,8	G	51	0,51	R	22
Marker52276	144.103	Cma_Chr02	9419961	T	C	T	15	14,1	C	14	0,14	T	21	21,0	Y	8	6,2	C	51	0,51	C	27	0,27	C	22	1,21	C	14	0,14	T	16	16,0	Y	39	18,21	Y	16	4,12	C	4	0,4	Y	16	6,10	T	19	19,0	Y	14
Marker52441	145.103	Cma_Chr02	9572566	T	C	C	20	1,19	T	18	18,0	C	16	0,16	Y	20	14,6	T	63	63,0	T	32	32,0	T	53	53,0	T	48	47,1	C	30	1,29	Y	26	20,6	Y	36	23,13	C	45	0,45	Y	101	54,47	C	76	0,76	Y	35
Marker52439	145.103	Cma_Chr02	9572416	A	G	G	13	0,13	A	24	24,0	G	16	0,16	R	21	14,7	A	63	63,0	A	32	32,0	A	54	53,1	A	48	48,0	G	30	1,29	R	26	20,6	R	34	20,14	G	45	0,45	R	101	54,47	G	76	0,76	R	35
Marker52438	145.103	Cma_Chr02	9572405	A	G	G	13	0,13	A	27	27,0	G	16	0,16	R	21	14,7	A	63	63,0	A	32	32,0	A	54	53,1	A	48	48,0	G	30	1,29	R	27	21,6	R	34	20,14	G	45	0,45	R	102	54,48	G	76	0,76	R	35
Marker52437	145.103	Cma_Chr02	9572380	G	C	C	12	0,12	G	19	19,0	C	16	0,16	S	21	14,7	G	63	63,0	G	32	32,0	G	54	53,1	G	48	48,0	C	30	1,29	S	27	21,6	S	34	20,14	C	45	0,44	S	102	54,47	C	76	0,76	S	35
Marker52759	145.103	Cma_Chr02	9773219	A	T	T	12	0,12	A	17	17,0	T	6	0,6	W	13	11,2	A	3	3,0	A	4	4,0	A	15	15,0	A	4	4,0	T	19	0,19	W	20	15,5	W	7	2,5	T	12	0,12	W	9	6,3	T	2	0,2	W	11
Marker52469	145.603	Cma_Chr02	9574703	G	A	A	17	0,17	G	19	19,0	A	39	2,37	R	36	14,22	G	62	62,0	G	31	30,1	G	47	47,0	G	35	35,0	A	60	2,58	R	54	33,21	R	57	27,30	A	33	2,31	R	85	49,36	A	34	0,34	R	23
Marker52428	145.603	Cma_Chr02	9565823	A	G	G	15	0,15	A	23	23,0	G	15	0,15	R	31	15,15	A	72	71,1	A	46	46,0	A	56	56,0	A	64	60,3	G	60	0,60	R	29	14,15	R	72	35,36	G	50	0,50	R	124	66,57	G	102	1,101	R	25
Marker52611	146.103	Cma_Chr02	9638068	G	A	G	15	14,1	A	19	1,18	G	48	47,1	R	28	17,11	A	61	0,61	A	29	0,29	A	53	0,53	A	44	3,41	G	83	82,0	R	50	27,23	R	110	53,53	G	41	39,2	R	65	38,27	G	38	37,1	R	38
Marker52762	146.103	Cma_Chr02	9774189	T	C	C	17	0,17	T	21	21,0	C	17	0,16	Y	10	3,7	T	27	27,0	T	19	19,0	T	21	21,0	T	25	25,0	C	26	0,26	Y	42	16,26	Y	22	10,12	C	14	0,14	C	6	0,6	Y	16	2,14	Y	21
Marker53356	146.603	Cma_Chr02	9991410	C	G	C	15	14,1	G	21	0,21	S	28	25,3	S	23	3,20	G	51	1,50	G	27	0,27	G	52	0,52	G	33	0,33	C	72	72,0	S	32	12,20	S	63	20,43	C	32	32,0	S	60	40,20	C	48	47,0	S	18
Marker53510	147.103	Cma_Chr02	10008597	C	A	C	18	18,0	A	15	0,15	C	23	23,0	A	21	0,21	A	24	0,24	A	32	0,32	A	42	0,42	A	18	0,18	C	27	27,0	M	60	28,32	M	33	14,19	C	21	21,0	M	20	14,6	C	29	29,0	M	17
Marker53511	147.103	Cma_Chr02	10008635	G	T	G	18	18,0	T	16	0,16	G	23	23,0	T	21	0,21	T	24	0,24	T	32	0,32	T	42	0,42	T	18	0,18	G	27	27,0	K	60	28,32	K	33	14,19	G	21	21,0	K	20	14,6	G	29	29,0	K	17
Marker53509	147.103	Cma_Chr02	10008358	T	C	T	13	13,0	C	16	0,16	T	23	23,0	C	22	1,21	C	24	0,24	C	32	0,32	C	38	0,38	C	18	0,18	T	27	27,0	Y	61	29,32	Y	33	14,19	T	21	21,0	Y	20	14,6	T	29	29,0	Y	18
Marker53199	147.603	Cma_Chr02	9967916	C	T	C	12	12,0	T	15	0,15	C	16	16,0	T	4	0,4	T	8	0,8	Y	12	2,10	T	15	0,15	T	6	0,6	C	19	19,0	Y	21	11,10	Y	11	4,7	C	13	13,0	C	1	1,0	C	14	14,0	Y	20
Marker53307	147.603	Cma_Chr02	9984458	A	T	A	16	16,0	T	19	0,19	A	14	14,0	T	20	0,20	T	28	0,28	T	36	0,36	T	38	0,38	T	30	0,30	A	38	38,0	W	29	13,16	W	36	15,21	A	16	16,0	W	26	13,13	A	37	37,0	W	25
Marker53306	147.603	Cma_Chr02	9984424	A	G	A	17	17,0	G	18	0,18	A	14	14,0	G	20	0,20	G	28	0,28	G	36	0,36	G	38	0,38	G	30	0,30	A	37	37,0	R	29	13,16	R	36	15,21	A	16	16,0	R	26	13,13	A	36	36,0	R	25
Marker53414	147.603	Cma_Chr02	9997650	A	T	A	14	14,0	T	17	0,17	A	26	26,0	T	31	0,31	T	27	1,26	T	20	0,20	T	33	0,33	T	19	0,19	A	24	24,0	W	21	12,9	W	24	9,14	A	9	9,0	W	9	6,3	A	13	12,1	W	9
Marker53413	147.603	Cma_Chr02	9997611	T	C	T	10	10,0	C	14	0,14	T	26	26,0	C	31	0,31	C	27	1,26	C	20	0,20	C	33	0,33	C	19	0,19	T	24	24,0	Y	21	12,9	Y	24	9,15	T	9	9,0	Y	9	6,3	Y	13	12,1	Y	11
Marker53613	147.603	Cma_Chr02	10049335	C	T	T	20	0,20	C	15	15,0	T	25	0,25	C	32	32,0	C	124	124,0	C	49	49,0	C	94	94,0	C	73	73,0	T	60	1,59	Y	20	8,12	Y	57	27,30	T	50	3,47	Y	109	49,60	T	96	0,96	Y	74
Marker53525	147.603	Cma_Chr02	10010752	T	A	T	16	15,1	A	19	0,19	T	10	10,0	A	7	0,7	A	15	0,15	A	21	0,21	A	12	0,12	A	5	0,5	T	26	26,0	W	5	3,2	W	15	9,6	T	13	13,0	W	6	3,3	T	34	34,0	W	25
Marker53247	147.603	Cma_Chr02	9975424	C	T	C	18	18,0	T	18	0,18	C	40	39,1	T	35	0,35	T	79	0,79	T	57	0,57	T	68	0,68	T	52	0,52	C	53	52,1	Y	36	17,19	Y	61	26,35	C	38	37,1	Y	73	25,48	C	48	47,1	Y	55
Marker53293	147.603	Cma_Chr02	9982351	C	A	C	10	10,0	A	18	0,18	C	8	8,0	M	9	1,8	A	4	0,4	M	12	1,11	A	11	0,11	A	5	0,5	C	14	14,0	M	16	4,12	M	9	3,6	C	7	7,0	M	8	5,3	C	3	3,0	M	7
Marker53513	147.603	Cma_Chr02	10009015	A	G	A	14	14,0	G	19	1,18	A	22	22,0	G	29	0,29	G	48	1,47	G	37	1,36	G	52	0,52	G	50	0,50	A	27	27,0	R	38	16,22	R	24	9,15	A	19	19,0	R	16	3,13	A	14	13,1	R	32
Marker53512	147.603	Cma_Chr02	10008761	T	C	T	13	13,0	C	19	1,18	T	22	22,0	C	29	0,29	C	47	1,46	C	37	0,37	C	51	0,51	C	50	0,50	T	27	27,0	Y	38	16,22	Y	24	9,15	T	19	19,0	Y	16	3,13	Y	14	13,1	Y	32
Marker53615	147.603	Cma_Chr02	10068182	A	C	C	20	0,20	A	15	15,0	C	18	0,18	A	16	16,0	A	18	18,0	A	4	4,0	A	31	31,0	A	12	12,0	C	30	0,30	M	36	21,15	M	13	7,6	C	12	0,12	M	7	2,5	C	19	0,19	M	18
Marker52929	148.103	Cma_Chr02	9896031	A	T	T	15	0,15	A	19	19,0	T	5	0,5	A	11	11,0	A	2	2,0	A	10	10,0	A	7	7,0	A	5	5,0	T	11	0,11	W	21	11,10	W	13	9,4	T	5	0,5	N	.	.	N	.	.	W	5
Marker52947	148.603	Cma_Chr02	9901265	G	T	T	13	0,13	G	10	10,0	T	8	0,8	G	2	2,0	G	19	19,0	G	5	5,0	G	4	4,0	G	2	2,0	T	3	0,3	K	19	12,7	K	4	1,3	T	8	0,8	K	3	1,2	T	7	0,7	N	.
Marker52602	148.603	Cma_Chr02	9622691	G	A	G	14	14,0	A	11	0,11	G	3	3,0	A	2	0,2	A	2	0,2	A	1	0,1	A	5	0,5	A	7	0,7	G	16	16,0	R	14	4,10	R	13	6,7	G	8	8,0	A	1	0,1	G	11	11,0	R	5
Marker52624	149.703	Cma_Chr02	9651754	C	G	G	13	0,13	C	12	12,0	G	27	0,27	S	10	3,7	C	18	18,0	C	12	12,0	C	19	19,0	C	10	10,0	G	20	0,20	S	4	1,3	S	10	4,6	G	11	0,11	S	13	6,7	G	13	0,13	S	14
Marker52481	150.203	Cma_Chr02	9577790	G	A	G	17	17,0	A	20	0,20	G	7	7,0	R	12	11,1	A	13	0,13	A	2	0,2	A	11	0,11	A	10	0,10	G	20	20,0	R	14	12,2	R	15	9,6	G	14	14,0	R	19	16,3	G	21	21,0	R	4
Marker52623	150.703	Cma_Chr02	9651541	C	T	T	22	1,21	C	17	17,0	T	27	0,26	Y	10	3,7	C	18	18,0	C	12	12,0	C	19	19,0	C	10	10,0	T	20	0,20	Y	4	1,3	Y	10	4,6	T	11	0,11	Y	13	6,7	Y	14	1,13	Y	14
Marker52622	150.703	Cma_Chr02	9651518	A	G	G	22	0,22	A	21	21,0	G	27	0,27	R	10	3,7	A	18	18,0	A	12	12,0	A	19	19,0	A	10	10,0	G	20	0,20	R	4	1,3	R	10	4,6	G	11	0,11	R	13	6,7	R	14	1,13	R	14
Marker52621	150.703	Cma_Chr02	9651509	C	T	T	22	0,22	C	20	20,0	T	27	0,27	Y	10	3,7	C	18	18,0	C	12	12,0	C	19	19,0	C	10	10,0	T	20	0,20	Y	4	1,3	Y	10	4,6	T	11	0,11	Y	13	6,7	Y	14	1,13	Y	14
Marker52483	150.703	Cma_Chr02	9577870	G	A	A	18	0,18	G	16	16,0	A	6	0,6	R	12	1,11	G	13	13,0	G	2	2,0	G	11	11,0	G	10	10,0	A	20	0,20	R	12	2,10	R	16	7,9	A	14	0,14	R	22	6,16	A	21	0,21	R	4
Marker52482	150.703	Cma_Chr02	9577814	G	A	A	15	0,15	G	20	20,0	A	7	0,7	R	12	1,11	G	13	13,0	G	2	2,0	G	11	11,0	G	10	10,0	A	20	0,20	R	14	2,12	R	16	7,9	A	14	0,14	R	22	6,16	A	21	0,21	R	4
Marker52931	150.703	Cma_Chr02	9896244	T	C	C	22	1,21	T	19	19,0	C	5	0,5	T	11	11,0	T	2	2,0	T	9	9,0	T	7	7,0	T	5	5,0	C	11	0,11	Y	21	10,11	Y	13	9,4	C	5	0,5	N	.	.	N	.	.	Y	5
Marker52870	151.203	Cma_Chr02	9826809	A	C	C	19	1,18	A	18	18,0	C	1	0,1	A	8	8,0	A	1	1,0	A	10	10,0	A	4	4,0	A	9	9,0	C	36	0,36	M	12	8,4	A	7	7,0	C	4	0,4	M	8	4,4	C	16	0,16	M	13
Marker54432	0	Cma_Chr03	714249	T	C	T	19	18,1	C	10	0,10	Y	3	1,2	C	3	0,3	T	12	12,0	C	11	0,11	Y	6	1,5	Y	10	6,4	C	10	0,10	C	8	0,8	Y	16	4,12	T	3	3,0	Y	10	4,6	C	9	0,9	Y	6
Marker54434	0	Cma_Chr03	714444	C	T	C	21	21,0	T	15	0,15	Y	3	1,2	T	3	0,3	C	12	12,0	T	11	0,11	Y	6	1,5	Y	11	6,5	T	10	0,10	T	8	0,8	Y	17	5,12	C	3	3,0	Y	10	4,6	T	8	0,8	Y	6
Marker54101	0	Cma_Chr03	650585	C	A	C	18	17,1	A	17	0,17	M	4	1,3	A	11	0,11	C	25	25,0	M	10	2,8	M	30	14,16	M	15	6,9	A	33	1,32	A	8	0,8	M	49	26,23	C	3	3,0	M	7	3,4	A	18	0,18	M	15
Marker53691	0	Cma_Chr03	199697	G	A	A	23	0,23	G	15	15,0	R	12	8,4	G	11	11,0	A	9	0,9	G	10	10,0	R	10	5,5	G	6	6,0	G	18	17,1	G	10	10,0	R	8	5,3	A	14	0,14	R	9	7,2	R	4	1,3	R	7
Marker53675	0	Cma_Chr03	197466	A	T	T	13	0,13	A	28	28,0	W	15	5,10	A	17	16,0	W	37	4,33	A	40	40,0	W	27	13,14	A	14	14,0	A	46	46,0	A	72	71,1	W	35	29,6	T	31	2,29	W	25	7,18	W	19	12,7	W	10
Marker54102	0	Cma_Chr03	650610	A	G	A	17	16,1	G	18	0,18	R	4	1,3	G	11	0,11	A	25	25,0	R	10	2,8	R	30	14,16	R	15	6,9	G	33	0,33	G	8	0,8	R	49	26,23	A	3	3,0	R	7	3,4	G	18	0,18	R	15
Marker54250	0.5	Cma_Chr03	693879	A	G	A	18	18,0	G	15	0,15	R	13	6,7	R	20	8,12	A	6	6,0	G	13	0,13	R	11	9,2	R	19	8,11	G	18	0,18	G	15	0,15	R	18	8,10	A	18	18,0	R	19	3,16	G	12	0,12	R	11
Marker54449	1.016	Cma_Chr03	716181	C	T	C	16	15,1	T	12	0,12	Y	9	8,1	Y	8	3,5	C	15	15,0	T	11	0,11	Y	10	4,6	T	7	0,7	T	23	0,23	T	23	0,23	Y	14	9,4	C	2	2,0	Y	5	1,4	Y	10	1,9	Y	8
Marker54451	1.016	Cma_Chr03	716265	G	A	G	16	16,0	A	14	0,14	R	9	8,1	R	8	3,5	G	15	15,0	A	11	0,11	R	10	4,6	A	7	0,7	A	23	0,23	A	23	0,23	R	14	10,4	G	2	2,0	R	5	1,4	R	10	1,9	R	8
Marker54612	2.016	Cma_Chr03	751082	A	G	A	19	19,0	G	14	0,14	R	49	27,22	R	23	14,9	A	125	124,1	G	48	3,45	R	52	37,15	R	55	22,33	G	73	1,72	G	42	0,42	R	62	20,42	A	42	42,0	R	85	44,41	G	135	0,135	R	38
Marker54564	2.016	Cma_Chr03	736917	A	G	A	16	15,1	G	19	0,19	R	13	5,8	R	9	5,4	A	19	19,0	G	2	0,2	R	7	5,2	R	12	10,2	G	14	0,14	G	22	0,22	R	22	8,14	A	4	4,0	R	17	7,10	G	12	0,12	R	10
Marker55342	3.016	Cma_Chr03	816245	G	A	G	13	13,0	A	19	0,19	R	12	7,5	R	31	19,12	G	53	50,3	A	26	0,26	R	56	26,30	R	42	10,32	A	32	1,31	A	25	0,25	R	48	33,15	G	29	29,0	R	42	17,25	A	56	0,56	R	29
Marker55343	3.016	Cma_Chr03	816267	A	G	A	12	12,0	G	18	0,18	R	12	7,5	R	31	19,12	A	53	50,3	G	26	0,26	R	56	26,30	R	42	10,32	G	32	1,31	G	25	0,25	R	48	33,15	A	29	29,0	R	42	17,25	G	56	0,56	R	29
Marker55252	3.016	Cma_Chr03	806334	C	T	C	15	15,0	T	15	0,15	Y	5	2,3	Y	8	3,5	C	30	29,1	T	15	0,15	Y	44	27,17	Y	27	16,10	T	27	0,27	T	48	0,48	Y	32	14,18	C	13	13,0	Y	33	20,13	T	25	0,25	Y	25
Marker55253	3.016	Cma_Chr03	806356	G	T	G	15	15,0	T	14	0,14	K	5	2,3	K	8	4,4	G	30	29,1	T	15	0,15	K	44	27,17	K	27	17,10	T	27	0,27	T	48	0,48	K	32	14,18	G	13	13,0	K	33	20,13	T	25	0,25	K	25
Marker55246	4.016	Cma_Chr03	805512	C	T	C	17	16,1	T	18	0,18	Y	18	11,7	Y	6	4,2	C	25	25,0	T	21	0,21	Y	36	24,12	Y	25	16,9	T	27	0,27	T	38	0,38	Y	31	17,14	C	18	18,0	Y	23	19,4	T	34	0,34	Y	12
Marker55594	4.016	Cma_Chr03	856478	G	T	G	19	19,0	T	17	0,17	K	17	13,4	K	16	12,4	G	16	16,0	T	6	0,6	K	17	6,11	K	17	11,6	T	12	0,12	T	30	0,30	T	21	0,21	G	3	3,0	K	7	1,6	T	8	0,8	K	18
Marker55552	4.016	Cma_Chr03	851267	C	T	C	15	14,1	T	16	0,16	Y	15	9,6	Y	17	6,11	C	24	24,0	T	36	1,35	Y	25	12,12	Y	26	12,14	T	48	1,47	T	65	0,64	T	43	1,42	C	14	14,0	Y	39	14,24	T	45	0,45	Y	27
Marker55554	4.016	Cma_Chr03	851513	A	G	A	15	14,1	G	18	0,18	R	15	9,6	R	18	6,12	A	22	22,0	G	36	1,35	R	25	12,13	R	26	12,14	G	48	1,47	G	64	0,64	G	43	0,43	A	13	13,0	R	39	14,25	G	45	0,45	R	27
Marker55589	4.516	Cma_Chr03	855964	A	G	A	17	16,1	G	26	0,26	R	18	10,8	R	28	15,13	A	36	35,0	G	16	0,16	R	54	34,20	R	17	12,5	R	17	2,15	G	57	0,57	G	26	0,26	A	19	19,0	R	23	10,13	G	31	0,31	R	24
Marker54860	6.017	Cma_Chr03	769729	T	C	T	22	21,1	C	10	0,10	Y	9	4,5	Y	9	4,5	Y	8	7,1	C	12	0,12	Y	17	14,3	Y	11	2,9	C	10	0,10	C	63	0,63	Y	23	13,10	T	16	16,0	Y	6	5,1	C	36	0,36	Y	4
Marker54641	6.517	Cma_Chr03	752704	G	A	G	11	11,0	A	21	0,21	R	9	3,6	R	21	4,17	G	33	33,0	A	11	0,11	R	12	5,7	R	10	6,4	A	11	1,10	A	51	1,50	R	30	21,9	G	17	17,0	R	9	5,4	A	25	0,25	R	8
Marker54642	6.517	Cma_Chr03	752711	A	G	A	11	11,0	G	21	0,21	R	9	3,6	R	21	4,17	A	33	33,0	G	11	0,11	R	12	5,7	R	10	6,4	G	11	0,11	G	51	1,50	R	30	21,9	A	17	17,0	R	9	5,4	G	25	0,25	R	8
Marker54646	6.517	Cma_Chr03	752949	C	T	C	18	17,1	T	20	0,20	Y	9	3,6	Y	21	4,17	C	33	33,0	T	11	0,11	Y	12	5,7	Y	10	6,4	T	11	0,11	T	51	1,50	Y	29	20,9	C	17	17,0	Y	12	8,4	T	25	0,25	Y	8
Marker54605	6.517	Cma_Chr03	750620	A	G	A	16	16,0	G	19	0,19	G	8	0,8	A	3	3,0	A	11	11,0	G	10	0,10	A	9	9,0	R	11	7,4	G	13	0,13	G	26	0,26	R	3	2,1	A	1	1,0	R	9	5,4	G	16	0,16	R	6
Marker54857	6.517	Cma_Chr03	769499	C	T	C	18	18,0	T	12	0,12	Y	9	4,5	Y	9	4,5	C	8	7,1	T	12	0,12	Y	17	14,3	Y	11	2,9	T	10	0,10	T	64	0,64	Y	23	13,10	C	16	16,0	Y	6	5,1	T	35	0,35	Y	4
Marker54606	6.517	Cma_Chr03	750649	A	G	A	15	15,0	G	18	0,18	G	8	0,8	A	3	3,0	A	11	11,0	G	10	0,10	A	9	9,0	R	11	7,4	G	13	0,13	G	26	0,26	R	3	2,1	A	1	1,0	R	9	5,4	G	16	0,15	R	6
Marker55425	7.517	Cma_Chr03	824173	G	T	G	13	13,0	T	17	0,17	K	9	4,5	K	10	5,5	G	9	9,0	T	6	0,6	K	24	16,8	K	10	1,9	T	10	0,10	T	35	0,35	K	13	6,7	G	7	7,0	N	.	.	T	22	0,22	K	9
Marker55424	8.017	Cma_Chr03	824149	T	C	T	15	15,0	C	20	0,20	Y	9	4,5	Y	10	5,5	T	9	9,0	C	6	0,6	Y	24	16,8	Y	10	1,9	C	10	0,10	C	35	0,35	Y	13	6,7	T	7	7,0	N	.	.	C	22	0,22	Y	9
Marker55633	10.619	Cma_Chr03	860184	G	A	G	20	19,1	A	17	0,17	R	6	3,3	R	2	1,1	G	10	10,0	A	5	0,5	R	8	5,3	G	1	1,0	A	20	1,19	A	4	0,4	A	4	0,4	G	3	3,0	G	8	8,0	A	6	0,6	R	9
Marker55795	11.119	Cma_Chr03	956551	C	T	T	21	1,20	C	18	18,0	T	6	0,6	Y	10	5,5	T	2	0,2	C	3	3,0	Y	14	7,7	Y	13	11,2	C	11	11,0	C	51	50,1	C	16	16,0	T	1	0,1	Y	6	1,5	C	13	13,0	C	8
Marker55796	11.119	Cma_Chr03	956573	G	A	A	21	1,20	G	20	20,0	A	6	0,6	R	10	5,5	A	2	0,2	G	3	3,0	R	14	7,7	R	13	11,2	G	11	11,0	G	51	50,1	G	16	16,0	A	2	0,2	R	6	1,5	G	13	13,0	G	8
Marker56065	12.119	Cma_Chr03	1008081	G	A	A	19	0,19	G	14	14,0	R	8	7,1	R	15	12,3	A	26	0,26	G	8	8,0	R	12	5,7	R	8	2,6	G	21	21,0	G	21	21,0	G	24	24,0	A	22	0,22	R	4	2,2	G	37	37,0	R	10
Marker55956	12.119	Cma_Chr03	982657	C	T	T	14	1,13	C	16	16,0	Y	5	2,3	C	2	2,0	T	26	0,26	C	4	4,0	Y	24	14,10	Y	31	22,9	C	28	28,0	C	22	22,0	C	15	15,0	Y	2	1,1	Y	18	5,13	C	35	35,0	Y	9
Marker56159	12.119	Cma_Chr03	1017217	T	G	G	19	1,18	T	15	15,0	K	12	4,8	K	7	1,6	G	30	0,30	T	8	8,0	K	25	9,16	K	14	9,5	T	25	25,0	T	14	14,0	T	39	38,1	G	23	0,23	K	14	3,11	T	23	23,0	G	10
Marker56160	12.119	Cma_Chr03	1017246	C	T	T	19	1,18	C	21	21,0	Y	12	4,8	Y	7	1,6	T	30	0,29	C	8	8,0	Y	25	9,16	Y	14	9,5	C	25	25,0	C	14	14,0	C	39	38,1	T	23	0,23	Y	14	3,11	C	23	23,0	T	10
Marker57413	12.119	Cma_Chr03	1275862	T	G	T	18	18,0	G	11	0,11	K	10	3,7	K	15	10,5	T	5	5,0	G	3	0,3	K	9	2,7	K	9	1,8	G	6	0,6	G	47	0,47	G	5	0,5	T	6	6,0	K	4	1,3	G	1	0,1	G	3
Marker56297	12.119	Cma_Chr03	1041320	A	G	G	26	0,26	A	14	14,0	R	5	2,3	R	2	1,1	G	15	0,15	A	13	13,0	R	12	5,7	G	2	0,2	A	14	14,0	A	15	15,0	A	11	11,0	G	9	0,9	R	9	2,7	A	13	13,0	R	7
Marker56298	12.119	Cma_Chr03	1041337	C	T	T	27	0,27	C	15	15,0	Y	5	2,3	Y	2	1,1	T	15	0,15	C	13	13,0	Y	12	5,7	T	2	0,2	C	14	14,0	C	15	15,0	C	11	11,0	T	9	0,9	Y	9	2,7	C	13	13,0	Y	7
Marker56327	13.119	Cma_Chr03	1044331	A	G	G	10	0,10	A	11	11,0	R	19	8,11	R	10	5,5	G	94	0,94	A	10	10,0	R	42	32,10	R	26	13,13	A	36	36,0	A	53	53,0	A	17	17,0	G	22	0,22	R	62	43,19	A	84	84,0	R	35
Marker56664	13.619	Cma_Chr03	1082068	G	T	T	13	0,13	G	16	16,0	K	18	12,6	K	5	1,4	T	20	0,20	G	9	9,0	K	22	9,12	T	1	0,1	G	22	22,0	G	52	51,1	G	11	11,0	T	10	0,10	T	2	0,2	G	7	7,0	K	14
Marker56870	13.619	Cma_Chr03	1103489	T	A	T	29	27,2	A	21	0,21	W	22	12,10	W	27	8,19	T	42	42,0	A	19	0,19	W	62	35,27	W	14	8,6	A	35	0,35	A	46	0,46	A	26	0,26	T	19	19,0	W	38	25,13	A	44	0,44	W	22
Marker56872	13.619	Cma_Chr03	1103750	G	A	A	20	1,19	G	17	17,0	R	22	10,12	R	27	19,8	A	42	0,41	G	19	19,0	R	62	27,35	R	14	6,8	G	35	35,0	G	47	47,0	G	26	26,0	A	19	0,19	R	38	13,25	G	44	44,0	R	22
Marker56873	13.619	Cma_Chr03	1103763	G	A	A	19	1,18	G	17	17,0	R	22	10,12	R	27	19,8	A	41	0,41	G	19	19,0	R	62	27,35	R	14	6,8	G	35	35,0	G	47	47,0	G	26	26,0	A	19	0,19	R	38	13,25	G	44	44,0	R	22
Marker56874	13.619	Cma_Chr03	1103769	G	T	T	20	1,19	G	19	19,0	K	22	10,12	K	27	18,8	T	41	0,41	G	19	19,0	K	62	27,35	K	14	6,8	G	35	35,0	G	45	45,0	G	24	24,0	T	19	0,19	K	38	13,25	G	44	44,0	K	22
Marker56536	14.62	Cma_Chr03	1070997	G	A	A	20	1,19	G	25	25,0	A	1	0,1	R	11	3,7	A	18	0,18	G	5	5,0	R	16	6,10	R	6	3,3	G	26	25,1	G	7	7,0	G	23	22,1	N	.	.	R	7	4,3	R	24	21,3	R	9
Marker56522	15.62	Cma_Chr03	1068702	G	A	A	16	1,15	G	16	16,0	R	17	14,3	R	12	3,9	A	13	0,13	G	16	16,0	R	11	5,6	R	10	5,5	G	31	31,0	G	22	22,0	G	23	23,0	A	21	0,21	R	14	5,9	G	20	20,0	R	21
Marker56523	15.62	Cma_Chr03	1068711	A	G	G	17	1,16	A	15	15,0	R	17	14,3	R	12	3,9	G	13	0,13	A	16	16,0	R	11	5,6	R	10	5,5	A	31	31,0	A	22	22,0	A	23	23,0	G	21	0,21	R	13	4,9	A	20	20,0	R	21
Marker57414	16.12	Cma_Chr03	1277044	C	T	C	16	16,0	T	12	0,12	Y	18	9,9	Y	12	2,10	C	65	65,0	T	13	0,13	Y	34	22,12	Y	23	9,14	T	38	1,37	T	15	0,15	T	58	0,58	C	43	42,1	Y	65	35,30	T	35	0,35	Y	44
Marker57587	17.12	Cma_Chr03	1311958	G	A	G	12	12,0	A	16	1,15	G	4	4,0	R	7	5,2	G	8	8,0	A	14	0,14	R	21	8,13	R	8	2,6	A	5	0,5	A	4	0,4	A	13	0,13	G	11	11,0	R	6	4,2	A	5	0,5	R	6
Marker57588	17.12	Cma_Chr03	1311993	C	T	C	11	11,0	T	14	0,14	C	4	4,0	Y	7	5,2	C	8	8,0	T	14	0,14	Y	21	8,13	Y	8	2,6	T	5	0,5	T	4	0,4	T	13	0,13	C	11	11,0	Y	6	4,2	T	5	0,5	Y	6
Marker57796	17.62	Cma_Chr03	1342763	C	G	C	23	22,1	G	15	0,15	S	22	11,11	S	25	16,9	C	31	31,0	G	23	0,23	S	27	23,4	S	14	10,4	G	36	0,36	G	38	0,38	G	29	0,29	C	14	14,0	S	25	12,13	G	34	2,32	S	32
Marker58112	17.62	Cma_Chr03	1384852	T	C	T	18	17,1	C	11	0,11	Y	33	21,12	Y	19	10,9	T	32	30,2	C	26	0,26	Y	38	24,14	Y	15	8,7	C	59	0,59	C	19	0,19	C	61	2,59	T	27	27,0	Y	44	23,21	C	37	0,37	Y	17
Marker57792	17.62	Cma_Chr03	1341233	G	A	G	17	17,0	A	16	0,16	R	10	6,4	R	15	10,5	G	24	24,0	R	13	3,10	R	24	13,11	R	13	7,6	A	28	0,28	A	13	0,13	A	27	0,27	G	13	13,0	R	23	7,16	A	23	0,23	R	8
Marker58059	17.62	Cma_Chr03	1379353	T	C	T	19	19,0	C	14	0,14	Y	7	2,5	C	1	0,1	T	3	3,0	C	7	0,7	C	1	0,1	Y	16	11,5	C	2	0,2	C	6	0,6	C	17	0,17	T	1	1,0	Y	6	4,2	N	.	.	T	1
Marker58090	17.62	Cma_Chr03	1383277	T	C	T	19	18,1	C	12	0,12	Y	28	18,10	Y	19	8,11	T	35	35,0	C	7	0,7	Y	27	20,7	Y	12	10,2	C	16	0,16	C	27	0,27	C	26	0,26	T	29	29,0	Y	36	28,8	Y	11	1,10	Y	28
Marker58091	17.62	Cma_Chr03	1383319	T	C	T	18	17,1	C	14	0,14	Y	28	18,10	Y	19	8,11	T	37	37,0	C	7	0,7	Y	27	20,7	Y	13	11,2	C	17	0,17	C	32	0,32	C	26	0,26	T	29	29,0	Y	38	29,9	Y	11	1,10	Y	27
Marker58092	17.62	Cma_Chr03	1383354	T	G	T	18	17,1	G	15	0,15	K	28	18,10	K	19	8,11	T	37	37,0	G	7	0,7	K	27	20,7	K	13	11,2	G	17	0,17	G	32	0,32	G	26	0,26	T	29	29,0	K	38	29,9	K	11	1,10	K	27
Marker57735	18.12	Cma_Chr03	1334151	T	A	T	15	15,0	A	29	0,29	W	13	5,8	A	8	0,8	T	5	5,0	A	9	0,8	W	17	6,11	W	6	2,4	A	18	0,18	A	18	0,18	A	11	0,11	T	2	2,0	W	21	3,18	A	4	0,4	T	2
Marker57758	18.12	Cma_Chr03	1336669	G	T	G	18	17,1	T	17	0,17	K	12	7,5	K	13	12,1	G	8	8,0	K	9	1,8	K	12	4,8	K	13	7,6	T	8	0,8	T	29	0,29	T	11	0,11	G	13	13,0	K	10	6,4	T	14	1,12	K	10
Marker57998	19.22	Cma_Chr03	1369302	C	T	C	18	17,1	T	17	0,17	N	.	.	C	1	1,0	C	2	2,0	T	5	0,5	T	3	0,3	Y	7	3,4	N	.	.	N	.	.	T	6	0,6	N	.	.	T	2	0,2	N	.	.	N	.
Marker57999	19.22	Cma_Chr03	1369333	A	G	A	17	16,1	G	16	0,16	N	.	.	N	.	.	A	2	2,0	G	5	0,5	G	3	0,3	R	7	3,4	N	.	.	N	.	.	G	6	0,6	N	.	.	G	2	0,2	N	.	.	N	.
Marker59548	22.926	Cma_Chr03	1899738	G	A	G	17	17,0	A	12	0,12	R	5	3,2	R	5	1,4	R	12	11,1	A	7	0,7	R	11	2,9	G	5	5,0	A	22	0,22	A	34	0,34	A	17	0,17	R	9	5,4	A	17	0,17	A	15	0,15	A	2
Marker59471	23.426	Cma_Chr03	1880737	A	G	A	15	15,0	G	18	0,18	R	7	4,3	R	4	3,1	A	23	22,1	G	5	0,5	R	9	5,4	R	9	6,3	G	18	0,18	G	10	0,10	R	13	1,12	R	19	3,16	G	10	0,10	G	16	0,16	R	5
Marker59472	23.426	Cma_Chr03	1880752	G	C	G	18	18,0	C	14	0,14	S	7	4,3	S	4	3,1	G	23	22,1	C	5	0,5	S	9	5,4	S	9	6,3	C	18	0,18	C	10	0,10	C	13	1,11	S	19	3,16	C	10	0,10	C	16	0,16	S	5
Marker59473	23.426	Cma_Chr03	1880763	C	T	C	16	16,0	T	14	0,14	Y	7	4,3	Y	4	3,1	C	23	22,1	T	5	0,5	Y	9	5,4	Y	9	6,3	T	18	0,18	T	10	0,10	Y	13	1,12	Y	19	3,16	T	10	0,10	T	16	0,16	Y	5
Marker59341	23.426	Cma_Chr03	1863826	T	G	G	18	1,17	T	16	16,0	K	6	1,5	T	5	5,0	G	12	0,12	T	4	4,0	K	18	15,3	T	4	4,0	N	.	.	T	6	6,0	T	7	7,0	T	1	1,0	T	7	7,0	G	1	0,1	N	.
Marker59342	23.426	Cma_Chr03	1863865	G	A	A	17	1,16	G	17	17,0	R	6	1,5	G	5	5,0	A	12	0,12	G	4	4,0	R	18	15,3	G	4	4,0	N	.	.	G	6	6,0	G	7	7,0	G	1	1,0	G	7	7,0	A	1	0,1	N	.
Marker59789	23.926	Cma_Chr03	2022596	T	A	A	18	1,17	T	19	19,0	W	11	4,7	W	10	6,4	A	26	0,26	T	10	10,0	W	15	6,9	W	24	9,15	T	22	22,0	T	27	27,0	T	11	11,0	W	20	8,12	T	20	20,0	T	19	19,0	T	5
Marker59794	23.926	Cma_Chr03	2022852	C	T	T	17	1,16	C	18	18,0	Y	10	3,7	Y	10	6,4	T	26	0,26	C	10	10,0	Y	15	6,9	Y	24	9,15	C	22	22,0	C	25	24,1	C	11	11,0	Y	20	8,12	C	20	20,0	C	19	19,0	C	5
Marker59795	23.926	Cma_Chr03	2022870	T	C	C	18	1,17	T	18	18,0	Y	10	3,7	Y	10	6,4	C	26	0,26	T	10	10,0	Y	15	6,9	Y	24	9,15	T	22	22,0	T	25	25,0	T	11	11,0	Y	20	8,12	T	20	20,0	T	19	19,0	T	5
Marker59796	23.926	Cma_Chr03	2022880	A	G	G	18	1,17	A	17	17,0	R	10	3,7	R	10	6,4	G	26	0,26	A	10	10,0	R	15	6,9	R	24	9,15	A	22	22,0	A	25	25,0	A	11	11,0	R	20	8,12	A	20	20,0	A	19	19,0	A	5
Marker59797	23.926	Cma_Chr03	2022889	T	A	A	19	0,19	T	17	17,0	W	10	3,7	W	10	6,4	A	26	0,26	T	10	10,0	W	15	6,9	W	24	9,15	T	22	22,0	T	25	25,0	T	11	11,0	W	20	8,12	T	20	20,0	T	19	19,0	T	5
Marker61570	24.463	Cma_Chr03	2203196	T	G	G	20	0,20	T	12	12,0	K	7	5,2	T	6	6,0	G	8	0,8	T	3	3,0	T	2	2,0	K	7	3,4	T	17	17,0	T	13	13,0	T	16	16,0	K	5	3,2	T	20	20,0	T	9	9,0	G	5
Marker61571	24.463	Cma_Chr03	2203292	C	T	T	19	1,18	C	12	12,0	Y	7	5,2	C	6	6,0	T	8	0,8	C	3	3,0	C	2	2,0	Y	7	3,4	C	17	17,0	C	12	12,0	C	16	16,0	Y	5	3,2	C	20	20,0	C	9	9,0	T	5
Marker60527	25.201	Cma_Chr03	2092139	G	C	C	16	0,16	G	14	14,0	C	1	0,1	S	5	3,2	C	5	0,5	G	4	4,0	C	2	0,2	S	6	4,2	G	9	9,0	G	40	40,0	G	12	12,0	C	3	0,3	G	2	2,0	G	10	10,0	G	8
Marker60522	25.701	Cma_Chr03	2091961	C	T	T	12	0,12	C	13	13,0	T	1	0,1	Y	5	3,2	T	7	0,7	C	4	4,0	T	2	0,2	Y	6	4,2	C	9	9,0	C	40	40,0	C	12	12,0	T	3	0,3	C	2	2,0	C	10	10,0	Y	9
Marker60523	25.701	Cma_Chr03	2092027	C	T	T	11	0,11	C	13	13,0	T	1	0,1	Y	5	3,2	T	7	0,7	C	4	4,0	T	2	0,2	Y	6	4,2	C	9	9,0	C	40	40,0	C	12	12,0	T	3	0,3	C	2	2,0	C	10	10,0	Y	9
Marker61170	26.417	Cma_Chr03	2150339	T	C	C	17	1,16	T	13	13,0	Y	15	8,7	Y	18	7,11	C	27	0,27	T	25	25,0	Y	34	20,14	Y	24	11,12	T	24	24,0	T	91	91,0	Y	32	27,5	Y	8	6,2	T	41	39,2	T	19	19,0	Y	20
Marker61171	26.417	Cma_Chr03	2150350	A	G	G	15	1,14	A	13	13,0	R	15	8,7	R	18	7,11	G	27	0,26	A	25	25,0	R	34	20,14	R	23	11,12	A	24	24,0	A	91	91,0	R	32	27,5	R	8	6,2	A	39	37,2	A	19	19,0	R	20
Marker61162	26.417	Cma_Chr03	2150043	G	T	T	16	0,16	G	12	12,0	K	15	8,7	K	17	7,10	T	28	0,28	G	25	25,0	K	34	20,14	K	24	11,13	G	24	24,0	G	92	92,0	K	32	27,5	K	8	6,2	G	39	37,2	G	19	19,0	K	20
Marker61163	26.417	Cma_Chr03	2150065	T	A	A	16	1,15	T	13	13,0	W	15	8,7	W	17	7,10	A	28	0,28	T	25	25,0	W	34	20,14	W	24	11,13	T	24	24,0	T	92	92,0	W	32	27,5	W	8	6,2	T	39	37,2	T	19	19,0	W	20
Marker60465	26.922	Cma_Chr03	2086662	C	T	T	20	1,19	C	15	15,0	Y	27	11,16	Y	20	3,17	T	29	2,27	C	17	17,0	Y	8	3,5	Y	19	10,9	C	47	46,1	Y	23	21,2	C	46	46,0	Y	21	8,13	C	31	31,0	C	28	27,1	Y	14
Marker60466	26.922	Cma_Chr03	2086712	T	C	C	18	1,17	T	15	15,0	Y	27	11,16	Y	20	3,17	C	29	2,27	T	17	17,0	Y	8	3,5	Y	19	10,9	T	47	46,1	Y	24	22,2	T	46	46,0	Y	21	8,13	T	31	31,0	T	28	28,0	Y	14
Marker59940	26.922	Cma_Chr03	2031846	G	A	A	16	1,15	G	17	17,0	A	1	0,1	R	7	4,3	A	15	0,15	G	3	3,0	R	20	12,8	R	4	2,2	G	8	8,0	R	16	14,2	G	13	13,0	R	5	2,3	G	9	9,0	G	14	13,1	R	11
Marker60203	26.922	Cma_Chr03	2049519	G	A	A	14	0,14	G	11	11,0	R	17	6,11	R	5	3,2	A	21	0,21	G	11	11,0	R	24	7,17	R	14	8,6	G	35	35,0	G	13	13,0	G	30	30,0	R	16	11,5	G	29	29,0	G	25	25,0	R	7
Marker59915	26.922	Cma_Chr03	2029180	T	C	C	28	1,27	T	11	11,0	Y	13	3,10	Y	18	6,12	C	49	0,49	T	10	10,0	Y	22	4,18	Y	9	3,6	T	23	22,1	T	21	21,0	T	7	7,0	C	6	1,5	T	9	9,0	T	31	31,0	Y	8
Marker61345	26.922	Cma_Chr03	2162316	T	C	C	17	0,17	T	18	18,0	C	17	1,16	Y	19	6,13	C	23	0,23	T	9	9,0	Y	24	12,12	C	11	0,11	T	18	18,0	T	21	21,0	T	18	18,0	Y	7	1,6	T	23	23,0	T	7	7,0	Y	20
Marker59729	26.922	Cma_Chr03	2017901	G	C	C	19	0,19	G	18	18,0	S	13	4,9	S	17	10,7	C	49	0,49	G	19	19,0	S	27	17,10	S	18	11,7	G	22	21,1	G	23	23,0	G	38	37,1	S	20	10,10	G	56	56,0	G	29	28,1	S	28
Marker59730	26.922	Cma_Chr03	2017913	C	T	T	20	0,20	C	18	18,0	Y	13	4,9	Y	17	10,7	T	49	0,49	C	19	19,0	Y	27	17,10	Y	18	11,7	C	22	21,1	C	23	23,0	C	38	37,1	Y	20	10,10	C	56	56,0	C	29	28,1	Y	28
Marker61028	26.922	Cma_Chr03	2143967	C	T	T	25	0,25	C	24	24,0	Y	13	3,10	Y	14	5,9	T	28	0,28	C	31	31,0	Y	15	10,5	Y	19	10,9	C	34	34,0	C	28	27,1	Y	44	40,4	Y	4	2,2	C	37	37,0	C	21	21,0	Y	19
Marker60414	26.922	Cma_Chr03	2083318	G	A	A	23	1,22	G	20	20,0	R	27	20,7	R	25	14,11	A	53	0,53	G	26	26,0	R	45	22,23	R	36	18,18	G	41	40,1	G	8	8,0	G	32	32,0	R	35	16,19	G	49	49,0	G	34	33,1	R	35
Marker60415	26.922	Cma_Chr03	2083362	A	G	G	25	1,24	A	24	24,0	R	28	20,8	R	25	14,11	G	55	0,55	A	26	26,0	R	46	22,24	R	36	18,18	A	41	40,1	A	8	8,0	A	32	32,0	R	35	16,19	A	50	50,0	A	34	33,1	R	35
Marker60416	26.922	Cma_Chr03	2083402	C	T	T	25	1,24	C	25	25,0	Y	30	20,9	Y	25	14,11	T	53	2,50	C	27	27,0	Y	46	22,24	Y	36	18,18	C	41	40,1	C	8	8,0	C	32	32,0	Y	35	16,19	C	50	50,0	C	34	33,1	Y	35
Marker60492	26.922	Cma_Chr03	2088998	T	C	C	13	0,13	T	14	14,0	Y	19	4,15	Y	15	13,2	C	30	0,30	T	16	15,1	Y	37	9,27	Y	27	6,21	Y	17	15,2	T	41	41,0	T	19	19,0	Y	13	5,8	T	18	18,0	T	10	10,0	Y	17
Marker60706	26.922	Cma_Chr03	2115331	T	A	A	19	0,19	T	14	14,0	W	6	2,4	W	13	7,6	A	10	0,10	T	21	21,0	W	25	14,11	W	22	15,7	T	23	23,0	T	20	20,0	T	24	23,1	W	19	9,10	T	27	27,0	T	32	32,0	W	16
Marker61317	26.922	Cma_Chr03	2157631	C	A	A	11	0,11	C	18	18,0	M	20	10,10	M	21	7,14	A	88	0,88	C	15	15,0	M	61	10,51	M	46	24,22	C	33	33,0	C	25	25,0	C	66	66,0	M	64	21,43	C	100	99,1	C	104	104,0	M	42
Marker60007	27.627	Cma_Chr03	2036341	C	A	A	35	0,35	C	15	15,0	M	45	13,32	M	49	16,33	A	250	0,250	C	31	31,0	M	191	49,142	M	109	24,85	C	33	32,1	M	19	17,2	C	39	37,2	M	77	23,54	C	162	162,0	C	160	160,0	M	71
Marker59429	28.127	Cma_Chr03	1874591	C	T	T	11	0,11	C	12	12,0	Y	11	5,6	Y	6	2,4	T	16	0,16	C	12	12,0	Y	22	15,7	Y	17	5,12	C	22	22,0	C	38	38,0	C	25	25,0	Y	20	12,8	C	23	23,0	C	22	22,0	Y	17
Marker59549	28.127	Cma_Chr03	1901573	G	A	G	14	14,0	A	16	0,16	R	14	4,10	R	14	7,7	G	42	41,1	A	22	1,21	R	41	16,25	R	28	17,11	A	46	0,46	A	43	0,43	A	44	0,44	R	15	9,6	A	37	0,37	A	36	0,36	R	11
Marker59236	28.127	Cma_Chr03	1854952	A	G	G	18	1,17	A	17	17,0	R	17	12,5	R	18	5,13	G	13	0,13	A	6	6,0	R	11	2,9	R	11	5,6	A	25	25,0	A	35	35,0	A	12	12,0	R	4	3,1	A	28	28,0	A	29	29,0	R	17
Marker58666	28.627	Cma_Chr03	1774165	G	A	A	18	1,17	G	18	18,0	R	52	27,25	R	20	16,4	A	68	1,67	G	27	26,1	R	57	31,26	R	55	29,26	G	82	79,3	G	26	26,0	G	64	64,0	R	19	7,12	G	72	72,0	G	55	54,1	R	42
Marker58667	28.627	Cma_Chr03	1774346	C	T	T	16	1,15	C	25	25,0	Y	52	27,25	Y	20	16,4	T	68	1,67	C	27	26,1	Y	57	31,26	Y	55	29,26	C	83	80,3	C	26	26,0	C	63	63,0	Y	19	7,12	C	72	71,0	C	55	54,1	Y	41
Marker58512	29.127	Cma_Chr03	1755723	T	A	A	13	1,12	T	20	20,0	W	37	16,21	W	45	29,16	A	91	0,91	T	47	47,0	W	93	46,47	W	62	34,28	W	60	55,5	T	55	55,0	T	93	92,0	W	54	38,16	T	123	122,1	T	80	79,1	W	36
Marker58241	29.127	Cma_Chr03	1704687	T	C	T	15	15,0	C	20	0,20	Y	15	5,10	Y	14	5,9	T	32	31,1	C	10	0,10	Y	21	10,11	Y	14	9,5	C	17	0,17	C	43	0,43	C	37	0,37	Y	8	2,6	C	30	0,30	C	20	0,20	Y	7
Marker58634	29.127	Cma_Chr03	1771391	C	T	T	17	1,16	C	11	11,0	Y	10	8,2	Y	16	8,8	T	16	0,16	C	5	5,0	Y	18	11,7	Y	16	4,12	C	11	11,0	C	39	39,0	C	15	15,0	Y	2	1,1	C	10	10,0	C	10	10,0	Y	5
Marker58337	29.127	Cma_Chr03	1741551	T	A	A	17	2,15	T	14	14,0	W	31	20,11	W	18	7,11	A	19	0,19	T	18	18,0	W	23	8,15	W	10	5,5	T	30	29,1	T	28	28,0	T	22	22,0	W	19	11,8	T	19	19,0	T	16	16,0	W	13
Marker58338	29.127	Cma_Chr03	1741701	C	G	G	13	0,13	C	16	16,0	S	31	19,11	S	18	8,10	G	20	0,20	C	18	18,0	S	22	8,14	S	10	5,5	C	31	30,1	C	27	26,0	C	23	23,0	S	19	11,8	C	20	20,0	C	17	17,0	S	14
Marker58311	29.127	Cma_Chr03	1738304	A	G	G	17	1,16	A	12	12,0	R	15	6,9	R	11	6,5	G	25	1,24	A	12	12,0	R	17	12,5	R	8	2,6	A	16	15,1	A	7	7,0	A	15	15,0	R	10	5,5	A	11	11,0	A	13	12,0	R	8
Marker58661	29.627	Cma_Chr03	1773745	G	A	A	14	0,14	G	21	21,0	R	16	9,7	R	16	12,4	A	7	0,7	G	15	15,0	R	27	13,14	R	13	8,5	G	33	32,1	G	27	27,0	G	30	30,0	R	15	12,3	G	19	19,0	G	17	17,0	R	17
Marker58307	29.627	Cma_Chr03	1737830	A	G	G	22	0,22	A	17	17,0	R	36	16,20	R	27	14,13	G	104	0,104	A	33	33,0	R	86	28,58	R	40	9,30	A	48	46,2	A	39	39,0	A	76	76,0	R	39	18,21	A	63	63,0	A	69	69,0	R	41
Marker58309	29.627	Cma_Chr03	1738053	T	C	C	15	0,15	T	17	17,0	Y	35	16,19	Y	28	14,14	C	105	0,105	T	33	33,0	Y	87	29,58	Y	40	9,31	T	48	46,2	T	39	39,0	T	76	76,0	Y	39	18,21	T	63	63,0	T	69	69,0	Y	43
Marker61378	30.627	Cma_Chr03	2165348	T	C	C	18	1,17	T	15	15,0	Y	17	7,10	Y	18	9,9	C	28	1,27	T	19	18,1	Y	26	7,19	Y	17	10,7	T	49	49,0	T	22	21,1	T	47	46,1	Y	13	7,6	T	23	23,0	T	33	33,0	Y	24
Marker61379	30.627	Cma_Chr03	2165359	A	G	G	17	1,16	A	14	14,0	R	17	7,10	R	18	9,9	G	28	1,27	A	19	18,1	R	26	7,19	R	17	10,7	A	49	49,0	A	22	21,1	A	47	46,1	R	13	7,6	A	22	22,0	A	33	33,0	R	23
Marker60168	30.627	Cma_Chr03	2046445	G	A	A	12	0,12	G	25	25,0	R	21	6,15	R	9	7,2	A	19	0,19	G	8	8,0	R	9	3,6	R	21	14,7	G	38	38,0	G	37	36,1	G	25	25,0	R	15	7,8	G	31	31,0	G	11	11,0	R	12
Marker60827	31.127	Cma_Chr03	2128742	T	C	C	12	0,12	T	17	16,1	Y	17	8,9	Y	8	7,1	C	10	0,10	T	5	5,0	Y	12	8,4	Y	9	4,5	T	8	8,0	T	25	25,0	T	16	16,0	Y	10	2,8	T	13	13,0	T	19	19,0	Y	12
Marker60829	31.127	Cma_Chr03	2128890	T	C	C	18	1,17	T	14	14,0	Y	17	8,9	Y	8	7,1	C	10	0,10	T	5	5,0	Y	12	8,4	Y	9	4,5	T	8	8,0	T	24	24,0	T	16	16,0	Y	10	2,8	T	13	13,0	T	21	20,1	Y	12
Marker59413	31.627	Cma_Chr03	1871743	A	T	A	16	15,1	T	25	0,25	A	2	2,0	A	1	1,0	A	7	7,0	T	4	0,4	W	11	5,6	W	17	15,2	T	16	0,16	T	1	0,1	T	15	0,15	W	2	1,1	T	9	0,9	T	31	1,30	W	19
Marker60436	31.627	Cma_Chr03	2084680	T	G	G	15	0,15	T	18	18,0	K	18	12,6	K	12	5,7	G	14	0,14	T	7	7,0	K	18	9,9	K	12	8,4	T	18	18,0	T	17	17,0	T	15	15,0	K	6	4,2	T	17	17,0	T	19	18,1	K	8
Marker60435	31.627	Cma_Chr03	2084639	C	T	T	21	0,21	C	17	17,0	Y	18	11,6	Y	12	5,7	T	14	0,14	C	7	7,0	Y	19	9,10	Y	12	8,4	C	18	18,0	C	17	17,0	C	16	16,0	Y	6	4,2	C	17	17,0	C	19	18,1	Y	8
Marker59743	32.627	Cma_Chr03	2019085	T	C	C	20	1,19	T	20	20,0	Y	6	4,2	Y	3	1,2	C	11	0,11	T	3	3,0	Y	11	4,7	Y	22	14,8	T	10	10,0	T	24	24,0	T	3	3,0	Y	17	12,5	T	13	13,0	T	6	6,0	Y	7
Marker59742	32.627	Cma_Chr03	2019078	G	A	A	20	1,19	G	20	20,0	R	6	4,2	R	3	1,2	A	11	0,11	G	3	3,0	R	11	4,7	R	22	14,8	G	10	10,0	G	24	24,0	G	3	3,0	R	17	12,5	G	13	13,0	G	6	6,0	R	7
Marker59744	32.627	Cma_Chr03	2019125	A	G	G	21	1,20	A	19	19,0	R	6	4,2	R	3	1,2	G	11	0,11	A	3	3,0	R	11	4,7	R	22	14,8	A	10	10,0	A	24	24,0	A	3	3,0	R	17	12,5	A	13	13,0	A	6	6,0	R	7
Marker61581	34.228	Cma_Chr03	2204121	T	C	C	12	0,12	T	17	17,0	T	3	3,0	Y	13	8,5	C	18	0,18	T	15	15,0	Y	16	4,12	Y	18	6,11	T	10	10,0	T	18	18,0	T	10	10,0	Y	9	2,7	T	23	23,0	T	14	14,0	C	31
Marker61580	34.228	Cma_Chr03	2204107	G	T	T	13	0,13	G	17	17,0	G	3	3,0	K	13	8,5	T	18	0,18	G	15	15,0	K	16	4,12	K	18	6,11	G	10	10,0	G	18	18,0	G	10	10,0	K	9	1,7	G	23	23,0	G	14	14,0	T	31
Marker61579	34.228	Cma_Chr03	2203891	T	G	G	14	0,14	T	18	18,0	T	3	3,0	K	13	8,5	G	18	0,18	T	15	15,0	K	16	4,12	K	18	6,12	T	10	10,0	T	22	22,0	T	10	10,0	K	9	2,7	T	23	23,0	T	13	13,0	G	28
Marker61830	35.228	Cma_Chr03	2236796	C	T	T	17	0,17	C	16	16,0	Y	6	5,1	Y	11	5,6	T	16	0,16	C	26	26,0	Y	5	2,3	Y	8	6,2	C	6	6,0	C	9	9,0	Y	12	11,1	Y	5	3,2	C	20	19,1	C	4	4,0	T	2
Marker61829	35.228	Cma_Chr03	2236734	G	A	A	21	0,21	G	20	20,0	R	6	5,1	A	6	0,6	A	12	0,12	G	16	16,0	R	5	2,3	R	6	4,2	N	.	.	G	8	8,0	R	11	10,1	R	4	2,2	G	18	17,1	N	.	.	G	1
Marker61826	35.728	Cma_Chr03	2236577	G	T	T	14	0,14	G	14	14,0	K	6	5,1	K	9	3,6	T	16	0,16	G	27	27,0	K	5	2,3	K	8	6,2	G	6	6,0	G	10	9,0	G	11	11,0	K	5	3,2	G	20	19,1	G	3	3,0	K	2
Marker61827	35.728	Cma_Chr03	2236592	A	G	G	13	0,13	A	16	16,0	R	6	5,1	R	9	3,6	G	16	0,16	A	27	27,0	R	5	2,3	R	8	6,2	A	6	6,0	A	10	10,0	A	11	11,0	A	5	3,2	A	20	19,1	A	3	3,0	R	2
Marker61864	37.95	Cma_Chr03	2239408	G	A	A	12	0,12	G	16	16,0	R	14	11,3	R	10	4,6	A	23	0,23	G	9	9,0	R	32	10,22	G	10	10,0	G	27	27,0	G	51	51,0	G	18	18,0	R	11	4,7	G	35	35,0	G	33	33,0	A	10
Marker61866	37.95	Cma_Chr03	2239712	C	T	T	10	0,10	C	15	15,0	Y	13	10,3	Y	10	4,6	T	24	0,24	C	9	9,0	Y	32	10,22	C	10	10,0	C	27	27,0	C	51	51,0	C	18	18,0	Y	11	4,7	C	35	35,0	C	33	33,0	T	10
Marker61831	38.466	Cma_Chr03	2236887	T	G	G	15	0,15	T	16	16,0	K	13	9,4	K	12	6,6	G	12	0,12	T	22	22,0	K	13	11,2	K	17	11,6	T	21	21,0	T	44	44,0	T	30	30,0	K	12	10,2	T	35	35,0	T	21	20,1	K	15
Marker62601	39.466	Cma_Chr03	2367034	A	C	A	18	17,1	C	24	0,24	M	8	4,4	M	21	12,9	A	19	19,0	C	11	0,11	M	15	11,4	M	18	11,7	C	41	1,40	C	7	0,7	C	27	1,26	M	11	6,5	C	21	0,21	C	28	0,28	A	20
Marker61992	39.466	Cma_Chr03	2273370	T	C	T	22	22,0	C	15	0,15	Y	8	4,4	Y	6	4,2	T	9	9,0	C	4	0,4	Y	22	10,12	T	8	8,0	C	13	0,13	C	36	0,36	C	17	0,17	Y	5	4,1	C	10	0,10	C	20	0,20	T	9
Marker61993	39.466	Cma_Chr03	2273379	A	G	A	24	24,0	G	15	0,15	R	8	4,4	R	6	4,2	A	9	9,0	G	4	0,4	R	22	10,12	A	8	8,0	G	13	0,13	G	36	0,36	G	17	0,17	R	5	4,1	G	10	0,10	G	20	0,20	A	9
Marker61882	39.466	Cma_Chr03	2258498	G	A	G	17	17,0	A	14	0,14	R	12	5,7	R	10	6,4	G	29	29,0	A	11	0,11	R	41	17,24	R	32	14,18	A	22	0,22	A	54	0,54	A	19	0,19	R	14	3,11	A	15	0,15	A	16	0,16	G	4
Marker62546	39.966	Cma_Chr03	2361100	C	A	C	17	16,1	A	12	0,12	M	21	14,7	M	10	7,3	C	49	49,0	A	8	0,8	M	32	13,19	M	33	19,14	A	29	0,29	A	36	0,36	A	37	2,35	M	35	13,22	A	33	0,33	A	29	0,29	C	34
Marker62602	40.466	Cma_Chr03	2367092	G	T	G	17	16,1	T	20	1,19	K	8	4,4	K	21	12,9	G	19	19,0	T	11	0,11	K	15	11,4	K	19	12,7	T	41	1,40	T	7	0,7	T	28	1,27	K	11	6,5	T	24	0,24	T	28	0,28	G	20
Marker62603	40.466	Cma_Chr03	2367105	G	A	G	17	16,1	A	22	0,22	R	8	4,4	R	21	12,9	G	19	19,0	A	11	0,11	R	15	11,4	R	19	11,7	A	41	1,40	A	7	0,7	A	28	1,27	R	11	6,5	A	24	0,24	A	28	0,28	G	20
Marker62547	40.466	Cma_Chr03	2361111	C	T	C	17	16,1	T	12	0,12	Y	21	14,7	Y	10	7,3	C	49	49,0	T	8	0,8	Y	32	13,19	Y	33	19,14	T	29	0,29	T	36	1,35	T	37	2,34	Y	35	13,22	T	33	0,33	T	29	0,29	C	34
Marker62599	41.466	Cma_Chr03	2366743	T	C	T	15	14,1	C	20	0,20	Y	16	8,8	Y	32	16,15	T	41	41,0	C	21	0,21	Y	57	24,33	Y	20	7,13	C	51	0,51	C	46	0,46	C	41	0,41	Y	30	16,14	C	63	0,63	C	51	0,51	T	19
Marker62428	41.466	Cma_Chr03	2349062	T	C	T	18	18,0	C	21	0,21	Y	8	2,6	Y	14	3,11	T	10	10,0	C	16	0,16	Y	31	19,12	Y	12	5,7	C	5	0,5	C	18	0,18	C	13	0,13	T	4	4,0	C	12	0,12	C	13	0,13	T	6
Marker62054	41.466	Cma_Chr03	2288130	A	G	A	13	13,0	G	14	0,14	R	10	3,7	R	15	9,6	A	10	10,0	G	11	0,11	R	24	12,12	R	15	6,9	G	13	0,13	R	9	1,8	G	33	1,32	R	7	3,4	G	17	0,17	N	.	.	A	9
Marker63111	42.466	Cma_Chr03	2423485	T	A	T	11	11,0	A	18	0,18	W	37	17,20	W	10	9,1	W	58	28,30	A	24	0,24	W	43	8,35	W	27	15,12	A	38	0,38	W	9	1,8	A	52	0,52	W	24	16,8	A	58	0,58	A	62	0,62	T	19
Marker64057	47.685	Cma_Chr03	3192061	G	A	A	15	0,15	G	17	17,0	R	13	6,7	R	9	5,4	R	28	14,14	G	25	25,0	R	33	11,22	R	8	1,7	G	54	54,0	G	28	28,0	G	14	14,0	R	5	2,3	G	36	36,0	G	34	34,0	A	25
Marker64056	47.685	Cma_Chr03	3192000	A	G	G	13	0,13	A	21	21,0	R	13	6,7	R	9	5,4	R	30	12,16	A	24	24,0	R	33	11,22	R	8	1,7	A	54	54,0	A	28	28,0	A	14	14,0	R	5	2,3	A	36	36,0	A	34	34,0	G	25
Marker64135	47.685	Cma_Chr03	3198221	C	T	T	16	1,15	C	19	19,0	Y	32	12,20	Y	7	1,6	Y	86	50,36	C	36	36,0	Y	75	37,38	Y	32	14,18	C	60	60,0	C	32	32,0	C	52	52,0	Y	35	10,25	C	66	66,0	C	84	82,1	T	55
Marker64136	47.685	Cma_Chr03	3198268	A	G	G	16	0,16	A	19	19,0	R	31	12,19	R	7	1,6	R	86	50,36	A	36	36,0	R	76	37,39	R	32	14,18	A	60	60,0	A	32	32,0	A	52	52,0	R	35	10,25	A	66	66,0	A	84	83,1	G	55
Marker64137	47.685	Cma_Chr03	3198287	G	T	T	20	0,20	G	20	20,0	K	31	12,19	K	7	1,6	K	86	50,36	G	36	36,0	K	76	37,39	K	32	14,18	G	60	60,0	G	32	32,0	G	52	52,0	K	35	10,25	G	66	66,0	G	84	83,1	T	55
Marker64472	48.685	Cma_Chr03	3253599	C	T	T	16	1,15	C	17	17,0	C	6	6,0	Y	3	1,2	Y	6	3,3	C	7	7,0	C	5	5,0	C	2	2,0	C	3	3,0	C	7	7,0	C	24	24,0	T	3	0,3	C	10	10,0	N	.	.	N	.
Marker64316	48.685	Cma_Chr03	3224195	T	A	A	10	0,10	T	24	24,0	W	13	8,5	W	27	12,15	W	52	27,25	T	31	31,0	T	43	43,0	W	32	21,11	T	30	29,1	T	22	22,0	T	45	45,0	W	31	18,13	T	38	38,0	T	27	27,0	W	22
Marker64317	48.685	Cma_Chr03	3224210	T	C	C	12	0,12	T	20	20,0	Y	13	8,5	Y	27	12,15	Y	52	27,25	T	31	31,0	T	43	43,0	Y	32	21,11	T	30	29,1	T	22	22,0	T	45	45,0	Y	31	18,13	T	38	38,0	T	27	27,0	Y	22
Marker64504	48.685	Cma_Chr03	3256353	A	G	G	15	0,15	A	15	15,0	R	25	7,18	R	18	8,10	R	5	2,3	A	10	10,0	A	25	25,0	R	7	5,2	A	11	11,0	A	40	40,0	A	25	25,0	R	10	9,1	A	13	13,0	R	11	10,1	G	11
Marker64485	48.685	Cma_Chr03	3255128	C	T	T	13	0,13	C	14	14,0	Y	10	3,7	Y	17	2,15	Y	13	8,5	C	25	24,1	C	24	24,0	Y	17	9,8	C	14	13,1	C	16	16,0	C	15	15,0	T	16	0,16	C	14	14,0	C	17	17,0	T	16
Marker64486	48.685	Cma_Chr03	3255154	G	A	A	16	1,15	G	16	16,0	R	10	3,7	R	17	2,15	R	13	8,5	G	25	24,1	G	24	24,0	R	17	9,8	G	14	13,1	G	16	16,0	G	15	15,0	A	16	0,16	G	14	14,0	G	17	17,0	A	16
Marker64336	48.685	Cma_Chr03	3231558	C	T	T	11	0,11	C	17	17,0	Y	37	16,21	Y	41	17,24	Y	67	37,30	C	39	39,0	C	53	53,0	Y	36	18,18	Y	65	60,5	C	37	37,0	C	60	60,0	Y	30	17,13	C	74	74,0	C	75	73,2	T	38
Marker64555	49.185	Cma_Chr03	3267487	C	A	A	12	0,12	C	18	18,0	A	10	0,10	M	16	3,13	M	11	2,9	C	9	9,0	C	10	10,0	M	13	7,6	C	11	11,0	C	25	25,0	C	2	2,0	M	12	7,5	C	13	13,0	C	6	6,0	M	11
Marker64337	49.185	Cma_Chr03	3232015	A	G	G	16	1,15	A	20	20,0	R	29	18,11	R	15	5,10	R	37	23,14	A	24	24,0	A	29	29,0	R	19	9,10	A	27	27,0	A	29	29,0	A	44	44,0	R	20	12,8	A	26	26,0	A	39	39,0	G	18
Marker64216	49.185	Cma_Chr03	3215864	T	C	C	18	1,17	T	10	10,0	Y	71	44,27	Y	65	32,33	Y	179	84,95	T	82	82,0	T	184	184,0	Y	79	45,34	T	119	119,0	T	61	61,0	T	130	129,1	Y	57	28,29	T	160	159,1	T	119	114,5	C	84
Marker64249	49.185	Cma_Chr03	3217186	G	A	A	12	0,12	G	17	17,0	R	25	13,12	R	12	9,3	R	29	17,12	G	26	26,0	G	41	41,0	R	23	10,13	G	44	42,2	G	6	6,0	G	36	36,0	R	14	9,5	G	31	31,0	G	17	17,0	A	30
Marker64643	49.185	Cma_Chr03	3275683	C	T	T	16	0,16	C	16	16,0	Y	10	3,7	Y	8	2,6	Y	56	24,32	C	38	38,0	C	36	36,0	Y	23	13,10	C	27	27,0	C	39	39,0	C	44	43,1	Y	18	9,9	C	41	41,0	C	59	59,0	T	21
Marker64682	49.185	Cma_Chr03	3281205	A	G	G	11	0,11	A	14	14,0	R	51	30,21	R	31	12,19	R	57	20,37	A	49	48,1	A	21	21,0	R	38	8,30	A	39	39,0	A	35	34,1	A	41	41,0	R	34	18,16	A	50	50,0	A	53	52,1	G	64
Marker64683	49.185	Cma_Chr03	3281220	G	A	A	11	0,11	G	15	15,0	R	51	30,21	R	31	12,19	R	57	20,37	G	49	48,1	G	21	21,0	R	38	8,30	G	39	39,0	G	35	35,0	G	41	41,0	R	34	18,16	G	50	50,0	G	53	52,1	A	60
Marker64686	49.185	Cma_Chr03	3281443	G	A	A	13	0,13	G	17	17,0	R	51	30,21	R	31	12,19	R	57	20,37	G	49	48,1	G	21	21,0	R	38	8,30	G	39	39,0	G	35	35,0	G	41	41,0	R	34	18,16	G	50	50,0	G	53	52,1	A	63
Marker64624	49.685	Cma_Chr03	3273726	G	A	A	14	0,14	G	11	11,0	R	6	5,1	A	1	0,1	R	5	3,2	G	7	7,0	G	2	2,0	R	6	4,2	N	.	.	G	2	2,0	G	6	6,0	N	.	.	G	5	5,0	G	1	1,0	N	.
Marker64401	49.685	Cma_Chr03	3242517	T	C	C	20	1,19	T	17	17,0	Y	5	4,1	Y	9	6,3	Y	22	2,20	T	14	14,0	T	17	17,0	Y	8	4,4	T	12	12,0	T	21	21,0	T	13	13,0	Y	7	3,4	T	3	3,0	T	5	5,0	C	4
Marker64396	50.201	Cma_Chr03	3242287	A	C	C	16	1,15	A	23	23,0	M	5	4,1	M	8	6,2	M	22	2,20	A	14	14,0	A	17	17,0	M	8	4,4	A	12	12,0	A	19	19,0	A	14	13,1	M	7	3,4	A	3	3,0	A	4	4,0	C	4
Marker65129	52.803	Cma_Chr03	3421718	C	G	C	22	22,0	G	15	0,15	C	8	8,0	S	11	5,6	S	10	7,3	N	.	.	G	11	0,11	C	2	2,0	S	3	2,1	G	11	0,11	G	11	0,11	S	9	6,3	G	2	0,2	S	24	3,21	C	2
Marker65239	52.803	Cma_Chr03	3440762	C	T	C	16	15,1	T	23	0,23	C	12	12,0	Y	9	6,3	Y	20	9,11	T	24	0,24	T	15	0,15	Y	16	5,11	Y	19	10,9	T	16	0,16	Y	23	4,19	Y	12	6,6	T	32	0,32	T	45	0,45	Y	5
Marker65005	53.303	Cma_Chr03	3406731	A	G	A	16	16,0	G	22	0,22	R	8	7,1	A	6	6,0	R	18	11,7	G	11	0,11	G	19	0,19	R	19	8,11	R	25	9,16	G	25	0,25	G	19	0,19	R	18	8,10	G	19	0,19	G	29	0,29	A	9
Marker65489	53.803	Cma_Chr03	3487439	C	A	A	21	0,21	C	20	20,0	A	7	0,7	M	15	9,6	M	30	11,19	C	15	14,1	C	21	21,0	M	18	9,9	M	13	6,7	C	38	37,1	C	52	52,0	M	10	7,3	C	38	38,0	C	31	31,0	A	15
Marker65405	53.803	Cma_Chr03	3474472	T	G	T	18	18,0	G	19	0,19	T	11	11,0	K	20	9,11	K	37	14,23	G	13	0,13	G	21	0,21	K	11	3,8	K	35	18,17	G	23	0,23	G	23	0,23	G	1	0,1	G	35	1,34	G	23	0,23	T	17
Marker65408	53.803	Cma_Chr03	3474663	G	A	G	17	17,0	A	24	1,23	G	11	11,0	R	20	9,11	R	36	14,21	A	13	0,13	A	21	0,21	R	12	3,9	R	35	18,17	A	24	0,24	A	21	0,21	A	1	0,1	A	35	1,34	A	24	0,24	G	18
Marker65329	54.303	Cma_Chr03	3462470	G	A	G	17	16,1	A	11	0,11	G	12	12,0	R	28	5,23	R	42	18,24	A	24	0,24	A	25	0,25	R	20	11,9	R	23	7,16	R	12	3,9	A	40	0,40	R	18	9,9	A	42	0,42	A	41	0,41	G	13
Marker65737	55.803	Cma_Chr03	3590613	C	T	T	15	1,14	C	14	14,0	T	14	0,14	Y	15	8,7	Y	24	11,13	C	24	24,0	C	20	20,0	Y	19	10,9	Y	33	16,17	C	18	18,0	C	26	26,0	Y	9	7,2	C	22	22,0	C	29	28,1	Y	10
Marker65559	55.803	Cma_Chr03	3556525	T	C	C	18	1,17	T	19	19,0	C	14	0,14	Y	7	4,3	Y	18	8,10	T	18	18,0	T	15	15,0	Y	6	4,2	Y	16	9,7	T	12	12,0	T	14	14,0	Y	8	5,3	T	11	11,0	T	27	27,0	C	6
Marker65564	55.803	Cma_Chr03	3557373	C	T	C	10	10,0	T	16	0,16	C	8	8,0	Y	14	6,8	Y	16	4,12	T	14	0,14	T	13	0,13	Y	14	3,11	T	4	0,4	T	16	0,16	T	6	0,6	T	1	0,1	T	11	0,11	T	10	0,10	C	2
Marker65739	55.803	Cma_Chr03	3590654	G	C	C	18	1,17	G	13	13,0	C	12	1,11	S	5	2,3	S	31	20,11	G	7	7,0	S	17	15,2	S	16	13,3	S	22	15,7	G	13	13,0	S	22	18,4	S	6	5,1	G	15	15,0	G	17	17,0	C	14
Marker65740	55.803	Cma_Chr03	3590694	G	T	T	17	1,16	G	14	14,0	T	12	1,11	K	5	2,3	K	31	20,11	G	7	7,0	K	17	15,2	K	16	12,4	K	22	15,7	G	13	13,0	K	22	18,4	K	6	5,1	G	15	15,0	G	17	17,0	T	14
Marker66088	57.514	Cma_Chr03	3691414	A	G	G	11	0,11	A	10	10,0	G	10	0,10	R	9	4,5	G	1	0,1	A	4	4,0	A	7	7,0	R	4	2,2	R	6	3,3	A	21	21,0	A	9	9,0	R	5	1,4	A	7	7,0	A	13	13,0	G	2
Marker66320	58.514	Cma_Chr03	3737996	T	C	T	24	24,0	C	12	0,12	T	35	35,0	Y	18	8,10	Y	45	19,26	C	23	1,22	C	45	1,44	Y	33	11,22	Y	53	39,14	C	38	0,38	C	36	1,35	Y	20	6,14	C	80	0,80	C	75	0,75	T	17
Marker66297	59.014	Cma_Chr03	3734019	T	C	T	22	22,0	C	14	0,14	T	11	11,0	Y	17	11,6	Y	12	5,7	C	9	0,9	C	9	0,9	Y	7	2,5	Y	20	13,7	C	23	1,22	C	25	0,25	Y	8	6,2	C	21	0,21	C	15	0,15	T	3
Marker66300	59.014	Cma_Chr03	3734217	T	C	T	17	17,0	C	10	0,10	T	11	11,0	Y	17	11,6	Y	12	5,7	C	9	0,9	C	9	0,9	Y	7	2,5	Y	20	13,7	C	23	1,22	C	25	0,25	Y	8	6,2	C	21	0,21	C	15	0,15	T	3
Marker66489	59.514	Cma_Chr03	3793483	G	A	G	12	12,0	A	21	0,21	G	12	12,0	R	8	6,2	R	29	8,21	A	25	0,24	A	11	0,11	R	9	3,6	R	16	7,9	A	22	1,21	A	34	0,34	R	8	2,6	A	17	0,17	A	30	0,30	G	10
Marker66414	59.514	Cma_Chr03	3780590	C	A	C	19	18,1	A	17	0,17	C	1	1,0	C	1	1,0	M	6	2,4	A	12	0,12	A	7	0,7	M	4	3,1	M	16	12,4	A	10	0,10	A	6	0,6	C	1	1,0	A	4	0,4	A	5	0,5	C	5
Marker66415	59.514	Cma_Chr03	3780607	G	A	G	15	15,0	A	17	0,17	G	1	1,0	G	1	1,0	R	6	2,4	A	12	0,12	A	7	0,7	R	4	3,1	R	16	12,4	A	10	0,10	A	6	0,6	G	1	1,0	A	4	0,4	A	5	0,5	G	5
Marker66420	59.514	Cma_Chr03	3780862	T	G	T	15	14,1	G	20	0,20	T	8	8,0	K	13	10,3	K	18	8,10	G	6	0,6	G	8	0,8	K	7	3,4	K	10	7,3	G	8	0,8	G	11	0,11	K	3	1,2	G	22	0,22	G	15	0,15	T	7
Marker66702	60.014	Cma_Chr03	3827630	A	G	A	17	16,1	G	18	0,18	A	51	50,1	R	21	9,12	R	100	54,46	G	50	0,50	G	38	0,38	R	28	14,14	R	63	21,42	G	28	0,28	G	51	0,51	R	22	5,16	G	82	0,82	G	58	0,58	R	32
Marker66701	60.514	Cma_Chr03	3827613	G	A	A	17	1,16	G	16	16,0	A	51	1,50	R	21	12,9	R	100	46,54	G	50	50,0	G	38	38,0	R	28	14,14	R	63	42,21	G	28	28,0	G	51	51,0	R	22	16,6	G	82	82,0	G	58	58,0	R	32
Marker66694	61.515	Cma_Chr03	3824662	A	G	A	20	19,1	G	16	0,16	A	27	26,1	R	17	11,6	R	41	28,13	G	24	1,23	G	25	0,25	R	20	9,11	R	31	10,21	G	38	2,35	G	24	1,23	R	25	11,14	G	84	0,84	G	69	1,68	A	33
Marker66695	61.515	Cma_Chr03	3824682	A	T	A	19	18,1	T	14	0,14	A	27	26,1	W	17	11,6	W	41	28,13	T	24	1,23	T	25	0,25	W	20	9,11	W	31	10,21	T	38	2,36	T	24	1,23	W	25	11,14	T	84	0,84	T	69	1,68	A	33
Marker67099	63.616	Cma_Chr03	3926925	C	T	C	15	15,0	T	13	0,13	C	18	18,0	Y	20	14,6	Y	13	1,12	T	11	0,11	T	17	1,16	Y	8	5,3	Y	17	14,3	T	16	0,16	T	34	0,33	Y	10	6,4	T	9	0,9	T	19	0,19	Y	25
Marker67043	63.616	Cma_Chr03	3908562	T	C	T	15	15,0	C	16	0,16	T	20	20,0	Y	25	7,18	Y	47	33,14	C	20	1,19	C	29	0,29	Y	14	5,9	Y	25	14,11	C	18	0,18	C	38	0,38	Y	16	8,8	C	51	1,50	C	26	0,26	Y	9
Marker67046	63.616	Cma_Chr03	3908785	T	C	T	17	17,0	C	16	0,16	T	20	20,0	Y	25	7,18	Y	46	32,14	C	19	1,18	C	29	0,29	Y	14	5,9	Y	25	14,11	C	18	1,17	C	38	0,38	Y	16	8,8	C	51	1,50	C	26	0,26	Y	9
Marker67296	67.826	Cma_Chr03	4100567	C	G	C	24	24,0	G	12	0,12	C	17	17,0	G	4	0,4	S	27	17,10	G	3	0,3	G	27	0,27	S	40	21,19	S	15	7,8	S	19	8,11	G	43	2,41	G	15	1,14	G	37	0,37	G	34	0,34	C	22
Marker67307	67.826	Cma_Chr03	4102563	C	T	C	19	18,1	T	16	0,16	C	14	14,0	T	11	0,11	Y	26	12,14	T	10	0,10	T	14	0,14	Y	23	5,18	Y	16	4,12	Y	10	4,6	T	20	0,20	T	10	0,10	T	16	0,16	T	21	0,21	C	3
Marker67308	67.826	Cma_Chr03	4102578	T	C	T	19	18,1	C	16	0,16	T	14	14,0	C	11	0,11	Y	26	12,14	C	10	0,10	C	14	0,14	Y	23	5,18	Y	16	4,12	Y	10	4,6	C	20	0,20	C	10	0,10	C	16	0,16	C	21	0,21	T	3
Marker67725	68.326	Cma_Chr03	4241584	T	C	T	16	16,0	C	17	0,17	T	14	14,0	C	15	0,15	Y	46	16,30	C	31	0,31	C	31	0,31	Y	29	8,21	Y	33	13,20	Y	18	12,6	C	59	0,59	C	11	0,11	C	37	0,37	C	51	1,50	T	23
Marker67727	68.326	Cma_Chr03	4241810	T	C	T	15	15,0	C	23	0,23	T	14	14,0	C	15	0,15	Y	46	16,30	C	30	0,30	C	31	0,31	Y	29	8,21	Y	33	13,20	Y	18	12,6	C	59	0,59	C	11	0,11	C	40	0,40	C	51	1,50	T	22
Marker67728	68.326	Cma_Chr03	4241859	T	C	T	18	18,0	C	25	0,25	T	14	14,0	C	15	0,15	Y	46	16,30	C	30	1,29	C	31	0,31	Y	29	8,21	Y	33	13,20	Y	18	12,6	C	59	0,59	C	11	0,11	C	40	0,40	C	50	1,49	T	22
Marker67694	68.826	Cma_Chr03	4224004	C	T	C	17	16,1	T	30	0,30	C	9	9,0	T	15	0,15	Y	28	17,11	T	18	0,18	T	14	0,14	Y	26	13,13	Y	33	14,19	Y	30	12,18	T	26	1,25	T	7	0,7	T	28	0,28	T	37	0,37	C	7
Marker67707	68.826	Cma_Chr03	4237377	C	T	C	16	16,0	T	20	0,20	C	22	21,1	T	9	0,9	Y	3	1,2	T	3	0,3	T	3	0,3	Y	11	3,8	Y	12	3,9	Y	18	9,9	Y	14	1,13	Y	5	1,4	T	5	0,5	T	11	0,11	C	11
Marker67518	69.326	Cma_Chr03	4172847	T	G	G	15	0,15	T	23	23,0	G	17	2,15	T	19	19,0	K	27	7,20	T	30	30,0	T	41	41,0	K	46	25,21	K	31	11,20	K	56	27,29	T	54	53,1	T	20	20,0	T	37	37,0	T	31	31,0	G	16
Marker67882	71.537	Cma_Chr03	4384384	C	T	C	12	12,0	T	21	0,21	C	14	14,0	T	9	0,9	Y	16	6,10	T	7	0,7	T	17	0,17	Y	13	11,2	Y	12	4,8	Y	15	10,5	T	12	0,12	T	2	0,2	T	11	0,11	T	7	0,7	C	8
Marker67883	71.537	Cma_Chr03	4384406	T	C	C	13	0,13	T	20	20,0	C	14	0,14	T	9	9,0	Y	16	10,6	T	7	7,0	T	17	17,0	Y	13	2,11	Y	12	8,4	Y	15	5,10	T	12	12,0	T	2	2,0	T	11	11,0	T	7	7,0	C	8
Marker67884	71.537	Cma_Chr03	4384415	A	G	A	11	11,0	G	19	0,19	A	14	14,0	G	9	0,9	R	16	6,10	G	7	0,7	G	17	0,17	R	13	11,2	R	12	4,8	R	15	10,5	G	12	0,12	G	2	0,2	G	11	0,11	G	7	0,7	A	8
Marker68001	71.537	Cma_Chr03	4412583	G	A	G	14	14,0	A	15	0,15	G	3	3,0	A	16	0,16	R	16	7,9	A	10	0,10	A	7	0,7	R	7	3,4	R	11	8,3	G	5	5,0	A	18	0,18	A	14	0,14	A	21	0,21	A	10	0,10	G	4
Marker67968	71.537	Cma_Chr03	4397218	C	T	C	10	10,0	T	17	0,17	C	22	22,0	T	27	0,27	Y	21	13,8	T	17	0,17	T	13	0,13	Y	16	12,4	Y	33	12,21	Y	36	20,16	T	25	0,25	T	14	0,14	T	30	0,30	T	23	1,22	C	13
Marker68087	72.579	Cma_Chr03	4422361	T	A	A	14	0,14	T	29	29,0	A	29	0,29	T	19	16,1	W	66	27,36	T	46	40,3	T	70	66,0	W	34	16,18	W	60	43,13	W	46	36,10	T	59	59,0	T	37	34,0	T	86	85,0	T	60	59,0	A	53
Marker68086	73.079	Cma_Chr03	4422342	T	G	G	17	0,17	T	30	30,0	G	29	0,29	T	19	19,0	K	66	29,37	K	50	44,6	T	70	70,0	K	34	17,17	K	61	45,16	K	46	36,10	T	59	59,0	T	38	37,1	T	86	86,0	T	60	59,1	G	57
Marker68084	73.079	Cma_Chr03	4422299	C	T	T	13	0,13	C	31	31,0	T	29	0,29	C	19	19,0	Y	65	30,35	Y	48	43,5	C	70	70,0	Y	34	16,18	Y	61	45,16	Y	46	36,10	C	61	61,0	C	38	38,0	C	86	86,0	C	60	60,0	T	56
Marker68085	73.079	Cma_Chr03	4422319	G	A	A	16	0,16	G	32	32,0	A	29	0,29	G	19	19,0	R	66	30,36	R	50	45,5	G	70	70,0	R	34	16,18	R	61	45,16	R	46	36,10	G	61	61,0	G	38	38,0	G	86	86,0	G	60	60,0	A	57
Marker68171	78.5	Cma_Chr03	4621898	A	G	G	15	0,15	A	16	16,0	G	30	0,30	A	23	22,1	R	89	58,31	A	18	17,0	A	50	50,0	A	44	43,1	R	41	20,21	R	35	22,13	R	57	32,25	A	57	57,0	A	117	114,3	A	131	131,0	G	38
Marker68174	78.5	Cma_Chr03	4622125	T	G	G	12	0,12	T	11	11,0	G	32	0,32	T	24	23,1	K	89	58,31	T	18	18,0	T	50	50,0	T	44	43,1	K	41	20,21	K	36	22,14	K	57	32,25	T	57	57,0	T	117	115,2	T	131	131,0	G	36
Marker68172	78.5	Cma_Chr03	4621922	A	G	G	15	0,15	A	18	18,0	G	30	0,30	A	23	22,1	R	89	58,31	A	18	17,1	A	50	50,0	A	44	43,1	R	41	20,21	R	35	22,13	R	57	32,25	A	57	57,0	A	117	115,2	A	131	131,0	G	38
Marker68234	79.601	Cma_Chr03	4690965	T	C	T	15	15,0	C	21	0,21	T	17	17,0	C	16	0,16	Y	18	6,12	C	18	0,18	C	12	0,12	C	11	0,11	Y	20	8,12	Y	35	13,22	Y	45	19,26	C	6	0,6	C	31	0,31	C	27	1,26	Y	14
Marker68233	80.101	Cma_Chr03	4690940	T	C	T	13	13,0	C	21	0,21	T	17	17,0	C	16	0,16	Y	18	6,12	C	17	0,17	C	12	0,12	C	11	0,11	Y	20	8,12	Y	35	13,22	Y	45	19,26	C	6	0,6	C	31	0,31	C	27	1,26	Y	14
Marker68237	80.601	Cma_Chr03	4691123	T	G	T	11	11,0	G	16	0,16	T	5	5,0	G	5	0,5	K	12	8,4	G	8	0,8	G	9	0,9	G	8	0,8	N	.	.	K	9	3,6	K	16	10,6	G	7	0,7	G	5	0,5	G	1	0,1	T	1
Marker68205	81.601	Cma_Chr03	4667600	G	A	G	15	14,1	A	25	0,25	G	11	11,0	A	14	0,14	R	18	7,11	A	10	0,10	A	32	0,32	A	21	1,20	R	32	15,17	R	29	14,15	R	27	8,18	A	9	0,9	A	30	0,30	A	20	1,19	G	13
Marker68321	82.601	Cma_Chr03	4724031	G	A	G	17	16,1	A	14	0,14	G	5	5,0	A	5	0,5	R	15	8,7	A	9	0,9	A	20	0,20	A	7	0,7	R	34	25,9	R	9	4,5	R	14	8,6	A	9	0,8	A	9	0,9	A	17	0,17	R	13
Marker68477	84.101	Cma_Chr03	4764057	A	G	A	10	10,0	G	22	0,22	A	21	21,0	G	13	0,13	R	28	22,6	G	11	0,11	G	27	0,27	G	15	0,15	R	29	19,10	R	14	9,5	R	25	12,13	G	9	0,9	G	24	0,24	G	33	0,33	A	7
Marker68478	84.101	Cma_Chr03	4764065	C	T	C	11	11,0	T	20	0,20	C	21	21,0	T	13	0,13	Y	28	22,6	T	11	0,11	T	27	0,27	T	15	0,15	Y	29	19,10	Y	14	9,5	Y	25	12,13	T	9	0,9	T	24	0,24	T	33	0,33	C	7
Marker68638	84.601	Cma_Chr03	4821136	A	T	T	11	0,11	A	15	15,0	W	12	1,11	A	1	1,0	W	48	31,17	A	3	3,0	A	35	35,0	A	29	29,0	T	11	0,11	N	.	.	W	34	18,16	A	36	36,0	A	108	108,0	A	63	62,1	T	17
Marker68692	85.702	Cma_Chr03	4872271	A	G	G	19	0,19	A	20	20,0	G	2	0,2	A	3	3,0	R	18	10,8	A	2	2,0	A	9	9,0	R	4	2,2	R	25	19,6	R	21	9,12	R	5	3,2	A	6	6,0	A	16	16,0	A	11	11,0	G	5
Marker68756	87.803	Cma_Chr03	4896388	T	A	A	15	0,15	T	24	24,0	A	8	0,8	T	7	7,0	W	11	5,6	W	7	6,1	T	14	14,0	W	4	3,1	W	33	15,18	W	23	12,11	W	27	15,12	T	13	13,0	T	7	7,0	W	17	6,11	W	28
Marker69004	89.303	Cma_Chr03	4963176	G	A	A	12	0,12	G	11	11,0	A	9	0,9	G	19	19,0	R	67	42,25	G	20	20,0	G	71	71,0	R	41	27,14	R	22	15,7	R	23	14,9	R	25	12,13	G	31	31,0	G	87	87,0	R	65	26,39	R	51
Marker69005	89.303	Cma_Chr03	4963234	G	A	A	13	0,13	G	16	16,0	A	9	0,9	G	19	19,0	R	67	42,25	G	20	20,0	G	71	71,0	R	41	27,14	R	22	15,7	R	24	14,10	R	25	12,13	G	31	31,0	G	87	87,0	R	64	25,39	R	51
Marker69099	89.803	Cma_Chr03	5012364	G	C	G	15	14,1	C	23	0,23	G	6	6,0	C	26	0,26	S	23	8,15	C	14	0,14	C	40	0,40	S	16	2,14	S	30	6,24	S	16	3,13	S	14	9,5	C	15	0,15	C	30	0,30	S	17	9,8	S	24
Marker69100	89.803	Cma_Chr03	5012389	T	C	T	10	10,0	C	18	0,18	T	6	6,0	C	26	0,26	Y	23	8,15	C	14	1,13	C	40	0,40	Y	16	2,14	Y	30	6,24	Y	16	3,13	Y	14	9,5	C	15	0,15	C	30	0,30	Y	17	9,8	Y	24
Marker68915	89.803	Cma_Chr03	4945871	T	C	C	18	1,17	T	18	18,0	C	19	0,19	T	9	9,0	Y	20	5,15	T	15	15,0	T	31	31,0	Y	9	4,5	Y	19	14,5	Y	33	19,14	Y	21	11,10	T	9	9,0	T	21	21,0	Y	25	18,7	Y	12
Marker69000	89.803	Cma_Chr03	4956492	C	A	C	14	14,0	A	12	0,12	C	1	1,0	N	.	.	M	21	16,5	A	3	0,3	A	16	0,16	M	22	14,8	M	11	5,6	M	25	12,13	M	19	8,11	N	.	.	M	5	1,4	M	9	3,6	M	6
Marker68999	89.803	Cma_Chr03	4956324	C	T	T	14	0,14	C	11	11,0	T	1	0,1	N	.	.	Y	20	5,14	C	3	3,0	C	16	16,0	Y	22	8,14	Y	11	6,5	Y	29	15,14	Y	19	11,8	N	.	.	Y	5	4,1	Y	6	3,3	Y	6
Marker69003	89.803	Cma_Chr03	4962981	G	A	A	18	0,18	G	20	20,0	A	8	0,8	G	19	19,0	R	68	43,25	G	20	20,0	G	71	71,0	R	41	27,14	R	22	15,7	R	23	13,10	R	25	12,13	G	31	31,0	G	87	87,0	R	64	25,39	R	51
Marker69320	90.303	Cma_Chr03	5069150	T	G	G	19	1,18	T	14	14,0	G	25	0,25	T	21	21,0	K	55	30,25	T	36	36,0	T	25	25,0	K	28	16,12	K	21	6,15	K	40	23,17	K	22	10,12	T	18	18,0	T	37	37,0	K	42	17,25	K	29
Marker69348	90.803	Cma_Chr03	5090592	T	A	T	17	16,1	A	21	0,21	T	19	19,0	A	14	0,14	W	12	6,6	A	12	0,12	A	29	0,29	W	19	12,7	W	27	12,15	W	29	18,11	W	27	11,16	A	14	0,14	A	5	0,5	W	13	7,6	W	8
Marker69507	91.803	Cma_Chr03	5152528	T	C	T	17	17,0	C	13	0,13	T	13	13,0	C	19	0,19	Y	38	22,16	C	18	0,18	C	24	1,23	Y	16	12,4	Y	26	15,11	Y	50	13,37	Y	26	14,12	C	31	0,31	C	21	0,21	Y	27	11,16	Y	22
Marker69509	91.803	Cma_Chr03	5152740	T	C	T	11	11,0	C	14	0,14	T	13	13,0	C	19	0,19	Y	38	22,16	C	18	0,18	C	24	1,23	Y	16	12,4	Y	25	15,10	Y	50	13,37	Y	26	14,12	C	31	0,31	C	21	0,21	Y	27	11,16	Y	22
Marker69467	91.803	Cma_Chr03	5116739	C	T	C	11	11,0	T	11	0,11	Y	14	13,1	T	15	0,15	Y	31	16,15	Y	10	1,9	T	35	0,35	Y	32	18,14	Y	29	19,10	Y	10	1,9	Y	27	12,15	T	12	0,12	T	25	0,25	Y	23	9,14	Y	34
Marker69378	91.803	Cma_Chr03	5103749	C	T	C	16	16,0	T	24	0,24	C	27	27,0	T	21	1,20	Y	102	53,49	T	51	0,51	T	55	1,54	Y	52	20,32	Y	76	44,32	Y	47	25,22	Y	76	25,51	T	29	1,28	T	105	0,105	Y	78	46,32	Y	44
Marker69396	92.309	Cma_Chr03	5105713	G	A	G	16	16,0	A	11	0,11	G	16	16,0	A	11	0,11	R	29	10,18	A	20	0,20	A	25	0,25	R	21	10,11	R	27	21,6	R	17	9,8	R	34	19,15	A	32	0,32	A	57	0,57	R	66	29,37	R	22
Marker69397	92.309	Cma_Chr03	5105753	T	G	T	19	19,0	G	16	0,16	T	16	16,0	G	11	0,11	K	29	10,19	G	20	0,20	G	25	0,25	K	21	10,11	K	27	21,6	K	17	9,8	K	34	19,15	G	32	0,32	G	57	0,57	K	67	30,37	K	22
Marker69398	92.309	Cma_Chr03	5105764	C	T	C	18	18,0	T	16	0,16	C	16	16,0	T	11	0,11	Y	29	10,19	T	20	0,20	T	25	0,25	Y	21	10,11	Y	27	21,6	Y	17	9,8	Y	34	19,15	T	32	0,32	T	57	0,57	Y	67	30,37	Y	22
Marker69399	92.309	Cma_Chr03	5105775	T	C	T	20	20,0	C	15	0,15	T	16	16,0	C	11	0,11	Y	29	10,19	C	20	0,20	C	25	0,25	Y	21	10,11	Y	27	21,6	Y	17	9,8	Y	34	19,15	C	32	0,32	C	57	0,57	Y	67	30,37	Y	22
Marker69611	93.809	Cma_Chr03	5218429	A	G	A	16	15,1	G	16	1,15	A	18	18,0	G	10	0,10	R	31	16,15	G	4	0,4	G	22	0,22	R	14	3,11	R	23	4,19	R	20	6,14	R	20	5,15	R	10	7,3	G	21	0,21	R	9	5,4	R	13
Marker69559	93.809	Cma_Chr03	5189873	C	T	C	14	14,0	T	11	0,11	C	14	14,0	T	12	0,12	Y	17	12,5	T	18	0,17	T	23	0,23	Y	17	4,13	Y	22	13,9	Y	32	22,10	Y	17	3,14	T	2	0,2	T	10	0,10	Y	12	6,6	Y	11
Marker69561	93.809	Cma_Chr03	5190486	T	C	T	20	19,1	C	13	0,13	T	16	16,0	C	10	0,10	Y	19	5,14	C	19	0,19	C	18	0,18	Y	20	9,11	Y	53	23,30	Y	21	10,11	Y	26	23,3	C	5	0,5	C	28	0,28	Y	30	13,17	Y	35
Marker69737	95.309	Cma_Chr03	5338440	G	A	A	25	2,23	G	16	16,0	A	33	0,33	G	43	43,0	R	50	36,14	G	28	28,0	G	39	38,0	R	50	26,24	R	38	29,9	R	26	10,16	R	32	16,16	R	33	14,19	G	50	50,0	A	78	1,77	R	36
Marker69667	95.809	Cma_Chr03	5311433	T	C	C	17	0,17	T	25	24,1	C	8	0,8	T	7	7,0	T	11	10,1	T	9	9,0	T	19	19,0	Y	8	3,5	Y	23	12,11	Y	24	7,17	Y	10	4,6	Y	6	2,4	Y	5	4,1	C	13	0,13	Y	12
Marker69786	96.309	Cma_Chr03	5375534	A	T	T	10	0,10	A	24	24,0	T	11	0,11	A	5	5,0	W	25	12,13	A	24	24,0	A	27	27,0	W	26	8,18	W	64	35,29	W	8	4,4	W	31	18,13	W	6	1,5	A	31	31,0	T	85	1,84	W	53
Marker69787	96.309	Cma_Chr03	5375570	A	C	C	10	0,10	A	21	21,0	C	11	0,11	A	5	5,0	M	25	12,13	A	24	24,0	A	27	27,0	M	26	8,18	M	64	35,29	M	8	4,4	M	31	18,13	M	6	1,5	A	31	31,0	C	85	1,84	M	53
Marker70112	97.31	Cma_Chr03	5514724	T	C	C	16	0,16	T	28	28,0	Y	3	1,2	C	1	0,1	Y	3	1,2	T	2	2,0	T	4	4,0	Y	9	4,5	Y	8	5,3	Y	32	19,13	Y	17	9,8	Y	5	1,4	T	8	8,0	C	5	1,4	Y	12
Marker69774	98.31	Cma_Chr03	5372494	C	T	T	14	0,14	C	21	21,0	T	24	0,24	C	9	9,0	Y	28	12,16	C	19	17,2	C	44	44,0	Y	13	4,9	Y	43	25,18	Y	27	18,9	Y	15	8,7	Y	14	11,3	C	51	51,0	T	38	0,38	Y	10
Marker69773	98.81	Cma_Chr03	5372464	G	C	C	18	0,18	G	28	28,0	C	24	0,24	G	9	9,0	S	28	12,16	S	19	17,2	G	44	44,0	S	13	4,9	S	43	25,18	S	27	18,9	S	15	8,7	S	14	11,3	G	50	50,0	C	38	0,38	S	10
Marker70111	98.81	Cma_Chr03	5514499	C	T	T	27	0,27	C	22	22,0	Y	3	1,2	T	1	0,1	Y	3	1,2	C	2	2,0	C	4	4,0	Y	9	4,5	Y	8	5,3	Y	32	19,13	Y	17	9,8	Y	4	1,3	C	8	8,0	T	5	1,4	Y	13
Marker69775	98.81	Cma_Chr03	5372756	G	A	A	16	0,16	G	22	22,0	A	24	0,24	G	9	9,0	R	28	12,16	R	19	17,2	G	44	44,0	R	13	4,9	R	43	25,18	R	29	18,11	R	15	8,7	R	14	11,3	G	52	51,1	A	37	0,37	R	11
Marker69870	99.81	Cma_Chr03	5467642	A	G	G	17	0,17	A	26	26,0	R	20	7,13	A	26	26,0	R	24	13,11	A	27	27,0	A	33	33,0	R	19	14,5	R	58	23,35	R	38	18,20	R	37	14,23	R	24	12,12	A	39	39,0	G	20	0,20	R	17
Marker69842	100.31	Cma_Chr03	5460821	G	A	A	16	0,16	G	18	18,0	R	10	5,5	G	6	6,0	R	16	11,5	G	17	17,0	G	9	9,0	R	9	7,2	R	20	14,6	R	7	5,2	A	10	0,10	R	5	3,2	R	5	4,1	N	.	.	R	6
Marker69843	100.31	Cma_Chr03	5460844	A	G	G	14	0,14	A	13	13,0	R	10	5,5	A	6	6,0	R	16	11,5	A	17	17,0	A	9	9,0	R	9	7,2	R	20	14,6	R	7	5,2	G	10	0,10	R	5	3,2	R	5	4,1	N	.	.	R	6
Marker69844	100.31	Cma_Chr03	5460856	T	C	C	14	0,14	T	15	15,0	Y	10	5,5	T	6	6,0	Y	16	11,5	T	17	17,0	T	9	9,0	Y	9	7,2	Y	20	14,6	Y	7	5,2	C	10	0,10	Y	5	3,2	Y	5	4,1	N	.	.	Y	6
Marker69845	100.31	Cma_Chr03	5460873	A	G	G	10	0,10	A	16	16,0	R	10	5,5	A	6	6,0	R	16	11,5	A	17	17,0	A	9	9,0	R	9	7,2	R	20	14,6	R	7	5,2	G	10	0,10	R	5	3,2	R	5	4,1	N	.	.	R	6
Marker70007	101.31	Cma_Chr03	5482716	T	A	A	19	0,19	T	12	12,0	W	11	5,6	T	9	9,0	W	19	2,17	T	5	5,0	T	30	30,0	W	8	4,4	W	11	4,7	W	27	16,11	W	7	1,6	A	6	0,6	T	12	12,0	A	15	0,15	W	3
Marker70089	101.81	Cma_Chr03	5505790	A	G	G	20	1,19	A	10	10,0	R	9	6,2	A	17	17,0	R	39	16,23	A	24	24,0	A	20	20,0	R	13	4,9	R	33	14,19	R	10	3,7	R	17	8,9	R	18	8,10	A	15	14,1	G	30	1,29	R	9
Marker70259	101.81	Cma_Chr03	5554509	T	G	G	10	0,10	T	13	13,0	K	41	30,11	T	30	30,0	K	76	44,32	T	36	36,0	T	82	82,0	K	54	32,22	K	65	29,36	K	26	16,10	K	54	22,32	K	22	7,15	T	85	84,1	G	153	3,150	K	29
Marker70308	102.31	Cma_Chr03	5564520	A	G	G	18	0,18	A	23	23,0	R	34	15,19	A	7	7,0	R	14	6,8	A	16	16,0	A	21	21,0	R	16	9,7	R	17	6,11	R	21	15,6	R	23	12,11	R	12	3,9	A	25	25,0	G	18	0,18	R	14
Marker70309	102.31	Cma_Chr03	5564575	G	C	C	19	1,18	G	26	26,0	S	34	15,19	G	7	7,0	S	14	6,8	G	16	16,0	G	21	21,0	S	16	9,7	S	17	6,11	S	21	15,6	S	23	12,11	S	12	3,9	G	25	25,0	C	18	0,18	S	14
Marker70310	102.31	Cma_Chr03	5564745	T	A	A	12	0,12	T	21	21,0	W	34	15,19	T	7	7,0	W	14	6,8	T	16	16,0	T	21	21,0	W	16	9,7	W	17	6,11	W	21	15,6	W	23	12,11	W	12	3,9	T	25	25,0	A	19	1,18	W	14
Marker70311	102.31	Cma_Chr03	5564810	G	A	A	10	0,10	G	18	18,0	R	34	15,19	G	7	7,0	R	14	6,8	G	16	16,0	G	21	21,0	R	16	9,7	R	17	6,11	R	21	15,6	R	23	12,11	R	12	3,9	G	25	25,0	A	19	1,18	R	14
Marker70405	103.31	Cma_Chr03	5601595	G	A	A	17	0,17	G	20	20,0	R	22	7,15	G	16	16,0	R	14	9,5	G	23	23,0	R	8	7,1	R	13	10,3	R	14	7,7	R	45	31,14	R	17	10,7	R	7	3,4	G	8	8,0	A	14	0,14	R	6
Marker70406	103.31	Cma_Chr03	5601633	G	A	A	15	0,15	G	18	18,0	R	22	7,15	G	16	16,0	R	14	9,5	G	23	23,0	G	8	7,1	R	13	10,3	R	14	7,7	R	45	31,14	R	17	10,7	R	7	3,4	G	8	8,0	A	14	0,14	R	6
Marker70407	103.31	Cma_Chr03	5601653	C	T	C	15	14,1	T	19	0,19	Y	22	15,7	T	16	0,16	Y	14	5,9	T	23	0,23	Y	8	1,7	Y	13	3,10	Y	14	7,7	Y	45	14,31	Y	17	7,10	Y	7	4,3	T	8	0,8	C	14	14,0	Y	6
Marker70356	103.81	Cma_Chr03	5581599	T	C	C	12	0,12	T	13	13,0	Y	33	16,17	T	24	24,0	Y	44	24,20	T	37	37,0	T	29	29,0	Y	21	6,15	Y	30	22,8	Y	19	11,8	Y	37	21,16	Y	19	12,7	T	36	36,0	C	32	0,32	Y	25
Marker70437	103.81	Cma_Chr03	5606767	A	G	G	18	1,17	A	16	16,0	R	22	14,8	A	12	12,0	R	41	24,17	A	32	32,0	A	19	19,0	R	14	10,4	R	26	14,12	R	22	12,10	R	32	14,18	R	23	11,12	A	49	49,0	G	36	2,34	R	7
Marker70438	103.81	Cma_Chr03	5606827	C	T	C	19	18,1	T	12	0,12	Y	22	8,14	T	12	0,12	Y	41	17,24	T	32	0,32	T	19	0,19	Y	15	5,10	Y	26	12,14	Y	21	10,11	Y	32	18,14	Y	23	12,11	T	48	0,48	C	35	33,2	Y	7
Marker70392	103.81	Cma_Chr03	5598554	A	G	G	16	1,15	A	24	24,0	R	24	8,16	A	7	7,0	R	16	10,6	A	18	18,0	A	20	19,1	R	13	3,10	R	19	7,12	R	31	11,20	R	12	8,4	R	10	6,4	A	7	7,0	G	20	0,20	R	8
Marker70044	104.31	Cma_Chr03	5498194	C	T	T	20	1,19	C	24	24,0	Y	11	9,2	C	9	9,0	Y	8	3,5	C	2	2,0	C	3	3,0	Y	14	2,12	Y	13	4,9	Y	21	12,9	Y	20	7,13	Y	15	7,8	C	8	8,0	T	23	1,22	Y	4
Marker70599	104.81	Cma_Chr03	5747112	G	A	G	21	20,1	A	21	0,21	R	17	10,7	A	11	0,11	R	22	9,13	A	10	0,10	A	21	0,21	R	17	4,13	R	21	8,13	R	44	23,21	R	19	4,15	R	10	7,3	A	9	0,9	G	23	22,0	R	10
Marker70566	105.31	Cma_Chr03	5740895	C	A	C	15	14,1	A	19	0,19	M	42	6,36	A	16	0,16	M	27	16,11	A	12	0,12	A	18	0,18	M	18	12,6	M	34	11,23	M	21	9,12	M	38	19,19	M	32	14,18	A	14	0,14	C	30	30,0	M	24
Marker70567	105.31	Cma_Chr03	5740959	A	C	A	15	14,1	C	20	0,20	M	42	6,36	C	16	0,16	M	26	16,10	C	12	0,12	C	18	0,18	M	18	12,6	M	34	11,23	M	22	10,12	M	38	19,19	M	32	14,18	C	15	0,15	A	30	30,0	M	24
Marker70499	105.81	Cma_Chr03	5708224	T	C	T	14	13,1	C	21	0,21	Y	17	10,7	C	13	0,13	Y	23	13,10	C	12	0,12	C	13	0,13	Y	10	5,5	Y	21	13,8	Y	31	17,14	Y	19	13,6	Y	18	15,3	C	16	0,16	T	22	22,0	Y	15
Marker70535	105.81	Cma_Chr03	5723541	A	G	A	12	12,0	G	23	0,23	R	7	3,4	G	21	0,21	R	16	11,5	G	9	0,9	G	9	0,9	R	18	5,13	R	18	6,12	R	21	11,10	R	16	7,9	A	12	12,0	G	18	0,18	A	23	23,0	R	13
Marker70565	105.81	Cma_Chr03	5740752	T	C	T	13	13,0	C	14	0,14	Y	38	6,32	C	17	0,17	Y	27	16,11	C	12	0,12	C	18	0,18	Y	18	12,6	Y	34	11,23	Y	22	10,12	Y	38	19,19	Y	32	15,17	C	15	0,15	T	30	30,0	Y	23
Marker70717	107.311	Cma_Chr03	5792494	A	C	C	16	1,15	A	19	19,0	M	15	6,9	A	13	13,0	M	7	2,5	A	8	8,0	A	27	27,0	M	8	5,3	M	14	4,10	M	25	14,11	M	7	6,1	M	5	3,2	M	11	8,3	C	4	0,4	M	2
Marker70716	107.311	Cma_Chr03	5792435	A	C	C	15	0,15	A	18	18,0	M	19	12,7	A	13	13,0	M	12	6,6	A	8	8,0	A	31	31,0	M	10	5,5	M	24	9,15	M	30	18,12	M	10	7,3	M	6	3,3	M	19	11,8	C	11	0,11	M	11
Marker70686	107.811	Cma_Chr03	5788742	T	C	T	12	12,0	C	13	0,13	Y	6	3,3	C	14	0,14	Y	21	10,11	C	29	1,28	C	18	1,17	Y	19	7,12	Y	11	5,6	Y	16	6,10	Y	15	7,8	C	4	0,4	Y	29	20,9	T	15	15,0	Y	4
Marker70685	108.321	Cma_Chr03	5788455	C	A	A	22	0,22	C	18	18,0	M	6	3,3	C	14	14,0	M	21	11,10	C	29	28,1	C	17	16,1	M	18	12,6	M	11	6,5	M	15	9,6	M	15	8,7	C	4	4,0	M	29	9,20	A	11	0,11	M	4
Marker70904	110.322	Cma_Chr03	5880268	C	G	G	21	0,21	C	14	14,0	S	5	3,2	C	6	6,0	S	14	2,12	C	4	4,0	C	12	12,0	S	15	6,9	S	20	13,7	S	31	13,18	S	40	11,29	C	6	6,0	S	5	4,1	G	8	0,8	S	5
Marker70903	110.322	Cma_Chr03	5880093	T	A	T	17	17,0	A	19	0,19	W	5	2,3	A	6	0,6	W	14	12,2	A	4	0,4	A	12	0,12	W	15	9,6	W	20	7,13	W	30	18,12	W	40	29,11	A	6	0,6	W	5	1,4	T	8	8,0	W	5
Marker71257	110.822	Cma_Chr03	5958308	A	C	A	10	10,0	C	18	0,18	M	13	4,9	C	9	0,9	M	18	8,10	C	2	0,2	C	18	0,18	M	9	4,5	M	28	12,16	M	5	1,4	M	15	9,6	M	15	9,6	M	15	12,3	A	27	27,0	M	8
Marker71283	110.822	Cma_Chr03	5964740	A	G	A	10	10,0	G	18	0,18	R	23	11,12	G	18	0,18	R	41	21,20	G	25	0,25	G	36	1,35	R	22	14,8	R	23	12,11	R	12	6,6	R	21	11,10	R	27	12,15	R	37	19,17	A	53	53,0	R	21
Marker71702	110.822	Cma_Chr03	6086745	G	T	G	21	20,1	T	20	0,20	K	25	10,15	T	18	0,18	K	95	39,56	T	47	1,46	T	99	0,99	K	48	18,30	K	50	21,29	K	26	20,6	K	63	25,38	K	30	6,24	K	69	32,37	G	50	50,0	K	32
Marker71110	110.822	Cma_Chr03	5933602	G	A	A	16	1,15	G	17	17,0	R	13	10,3	G	13	13,0	R	24	15,9	G	20	20,0	G	29	29,0	R	18	12,6	R	21	10,11	R	32	20,12	R	25	15,10	R	11	5,6	R	26	9,17	A	18	0,18	R	15
Marker70815	110.822	Cma_Chr03	5853609	C	T	T	11	0,11	C	13	13,0	Y	21	4,17	C	4	4,0	Y	26	12,14	C	14	14,0	C	21	21,0	Y	26	9,17	Y	16	10,6	Y	27	13,14	Y	19	13,6	Y	21	9,12	Y	32	20,12	T	27	0,27	Y	7
Marker71675	111.322	Cma_Chr03	6080478	A	G	A	16	16,0	G	11	0,11	R	4	2,2	G	14	0,14	R	9	6,3	G	7	0,7	G	26	1,25	R	11	5,6	R	30	11,19	R	34	14,20	R	12	6,6	R	8	4,4	R	26	13,13	A	8	8,0	R	12
Marker70996	111.322	Cma_Chr03	5903606	C	T	T	11	0,11	C	15	15,0	Y	13	11,2	C	4	4,0	Y	10	9,1	C	12	12,0	C	16	16,0	Y	8	4,4	Y	15	11,4	Y	21	6,15	Y	9	7,2	Y	11	8,3	Y	5	3,2	T	11	0,11	Y	7
Marker71388	111.322	Cma_Chr03	6019562	G	T	G	15	15,0	T	18	0,18	K	40	21,19	T	18	0,18	K	133	65,68	T	44	0,44	T	66	3,63	K	48	28,20	K	118	60,58	K	36	18,18	K	86	36,50	K	64	29,35	K	103	50,53	G	131	130,1	K	84
Marker71082	111.322	Cma_Chr03	5924677	T	C	C	12	0,12	T	21	21,0	Y	16	4,12	T	5	5,0	Y	24	5,19	T	24	24,0	T	25	25,0	Y	16	8,8	Y	40	14,26	Y	48	22,26	Y	13	10,3	Y	15	4,11	Y	28	8,20	C	27	0,27	Y	8
Marker70955	111.322	Cma_Chr03	5891046	C	T	C	19	19,0	T	19	0,19	Y	9	2,7	T	7	0,7	Y	20	10,10	T	20	0,19	T	12	0,12	Y	5	3,2	Y	63	22,41	Y	20	7,13	Y	26	11,15	Y	8	7,1	Y	27	14,13	C	56	56,0	Y	27
Marker71208	111.322	Cma_Chr03	5947974	T	C	T	10	10,0	C	17	0,17	Y	6	1,5	C	7	0,7	Y	8	5,3	C	5	0,5	C	10	0,10	Y	13	7,6	Y	11	3,8	Y	24	15,9	Y	8	4,4	Y	7	4,3	Y	3	1,2	T	4	4,0	C	2
Marker71105	111.322	Cma_Chr03	5931878	C	A	A	14	1,13	C	11	11,0	M	18	7,11	C	9	9,0	M	22	10,12	C	29	29,0	C	41	41,0	M	31	17,14	M	41	26,15	M	50	27,23	M	36	17,19	M	14	6,8	M	17	2,15	A	37	0,37	M	15
Marker71215	111.322	Cma_Chr03	5949605	C	G	G	10	0,10	C	21	21,0	S	19	8,11	C	2	2,0	S	9	6,3	C	10	10,0	C	13	13,0	S	15	5,10	S	38	18,20	S	11	5,6	S	17	6,11	S	14	7,7	S	18	2,16	G	26	0,26	S	16
Marker70856	111.822	Cma_Chr03	5866190	T	A	A	15	0,15	T	20	20,0	W	16	5,11	T	13	13,0	W	12	7,5	T	23	23,0	T	9	9,0	W	11	5,6	W	24	15,9	W	14	11,3	W	10	9,1	W	11	9,2	W	12	8,4	A	6	0,6	W	14
Marker70857	111.822	Cma_Chr03	5866244	A	T	T	13	0,13	A	14	14,0	W	16	5,11	A	13	13,0	W	12	7,5	A	23	23,0	A	9	9,0	W	11	5,6	W	24	15,9	W	16	11,5	W	10	9,1	W	11	9,2	W	12	8,4	T	6	0,6	W	14
Marker71071	111.822	Cma_Chr03	5921781	C	T	T	15	0,15	C	14	14,0	T	1	0,1	C	6	6,0	Y	7	2,5	C	3	3,0	C	8	8,0	Y	8	4,4	Y	19	4,15	Y	34	17,17	Y	8	5,3	Y	11	1,10	C	1	1,0	T	3	0,3	Y	11
Marker71072	111.822	Cma_Chr03	5921833	G	C	C	16	0,16	G	11	11,0	C	1	0,1	G	6	6,0	S	7	2,5	G	3	3,0	G	8	8,0	S	8	4,4	S	19	4,15	S	34	17,17	S	8	5,3	S	11	1,10	G	1	1,0	C	3	0,3	S	11
Marker71070	111.822	Cma_Chr03	5921569	T	C	C	17	0,17	T	14	14,0	C	1	0,1	T	6	6,0	Y	7	2,5	T	3	3,0	T	8	8,0	Y	8	4,4	Y	19	4,15	Y	34	17,17	Y	8	5,3	Y	11	1,10	T	1	1,0	C	3	0,3	Y	11
Marker71684	112.822	Cma_Chr03	6082694	G	C	G	19	19,0	C	21	1,20	S	15	4,11	C	11	0,11	S	39	6,33	C	14	0,14	C	44	1,43	S	22	8,14	S	21	5,16	S	12	2,10	S	19	8,11	S	22	2,20	S	25	3,22	G	10	10,0	S	10
Marker71580	115.425	Cma_Chr03	6064449	A	G	G	12	0,12	A	17	17,0	R	11	9,2	A	3	3,0	R	13	7,6	A	4	4,0	A	9	9,0	R	10	3,7	R	12	5,7	R	22	13,9	R	12	5,6	R	10	4,6	R	10	7,3	G	12	0,12	R	12
Marker71581	115.925	Cma_Chr03	6064474	T	C	T	16	16,0	C	17	0,17	Y	11	2,9	C	3	0,3	Y	13	6,7	C	4	0,4	C	9	0,9	Y	10	7,3	Y	12	7,5	Y	22	9,13	Y	12	7,5	Y	10	6,4	Y	10	3,7	T	12	12,0	Y	12
Marker71583	115.925	Cma_Chr03	6064666	C	A	C	16	15,1	A	19	0,19	M	11	2,9	A	3	0,3	M	13	6,7	A	3	0,3	A	9	0,9	M	10	7,3	M	12	7,5	M	22	9,13	M	12	7,5	M	10	6,4	M	10	3,7	C	12	12,0	M	12
Marker71584	115.925	Cma_Chr03	6064676	G	A	A	16	1,15	G	24	24,0	R	11	9,2	G	3	3,0	R	13	7,6	G	3	3,0	G	9	9,0	R	10	3,7	R	12	5,7	R	22	13,9	R	12	5,7	R	10	4,6	R	10	7,3	A	12	0,12	R	12
Marker71585	115.925	Cma_Chr03	6064700	G	A	G	17	16,1	A	21	0,21	R	11	2,9	A	3	0,3	R	13	6,7	A	3	0,3	A	9	0,9	R	10	7,3	R	12	7,5	R	22	9,13	R	12	7,5	R	10	6,4	R	10	3,7	G	12	12,0	R	12
Marker71586	115.925	Cma_Chr03	6064708	A	G	A	17	16,1	G	23	0,23	R	11	2,9	G	3	0,3	R	13	6,7	G	3	0,3	G	9	0,9	R	10	7,3	R	12	7,5	R	22	9,13	R	12	7,5	R	10	6,4	R	10	3,7	A	12	12,0	R	12
Marker71587	115.925	Cma_Chr03	6064738	A	G	G	18	1,17	A	21	21,0	R	11	9,2	A	3	3,0	R	13	7,6	A	4	4,0	A	9	9,0	R	10	3,7	R	12	5,7	R	22	13,9	R	12	5,7	R	10	4,6	R	10	7,3	G	12	0,12	R	12
Marker71683	118.527	Cma_Chr03	6082579	T	A	T	17	17,0	A	13	0,13	W	14	4,10	A	11	0,11	W	39	6,33	A	14	0,14	A	45	0,45	W	21	8,13	W	23	7,16	W	11	2,9	W	19	8,11	W	22	2,20	W	25	3,22	T	10	10,0	W	10
Marker71090	119.527	Cma_Chr03	5927507	G	A	A	15	0,15	G	19	19,0	R	27	8,19	G	22	22,0	R	41	7,34	R	24	22,2	G	21	20,1	R	14	5,9	R	49	31,18	R	56	36,20	R	43	21,22	R	19	8,11	R	34	14,20	A	30	0,30	R	38
Marker71789	122.631	Cma_Chr03	6229852	A	T	A	15	15,0	T	17	0,17	A	3	3,0	N	.	.	W	28	6,22	N	.	.	T	36	0,36	W	15	9,6	W	6	2,4	A	2	2,0	W	11	4,7	W	16	8,8	W	18	11,7	A	38	38,0	W	12
Marker71787	122.631	Cma_Chr03	6229807	A	G	A	15	14,1	G	19	0,19	A	3	3,0	N	.	.	R	28	6,22	N	.	.	G	36	0,36	R	15	9,6	R	6	2,4	A	2	2,0	R	11	4,7	R	16	8,8	R	18	11,7	A	38	38,0	R	12
Marker71788	122.631	Cma_Chr03	6229844	T	G	T	14	13,1	G	19	0,19	T	3	3,0	N	.	.	K	28	6,22	N	.	.	G	36	1,35	K	15	9,6	K	6	2,4	T	2	2,0	K	11	4,7	K	16	8,8	K	18	11,7	T	38	38,0	K	12
Marker72109	122.631	Cma_Chr03	6352426	G	C	G	16	16,0	C	24	0,24	G	6	6,0	C	1	0,1	S	2	1,1	C	6	0,6	C	17	0,17	S	9	4,5	S	4	1,3	G	8	8,0	S	5	4,1	S	8	1,7	G	5	5,0	G	2	2,0	S	11
Marker71835	122.631	Cma_Chr03	6235264	C	T	C	20	20,0	T	17	0,17	C	9	8,0	T	14	0,14	Y	31	16,15	T	23	0,23	T	32	0,32	Y	24	10,14	Y	50	23,27	C	27	27,0	Y	47	26,21	Y	16	5,11	Y	31	16,15	C	35	35,0	Y	15
Marker71836	122.631	Cma_Chr03	6235271	A	G	A	17	17,0	G	17	0,17	A	9	9,0	G	14	0,14	R	31	16,15	G	23	0,23	G	32	0,32	R	24	10,14	R	50	23,27	A	27	27,0	R	47	26,21	R	16	5,11	R	31	16,15	A	35	35,0	R	15
Marker71957	122.631	Cma_Chr03	6263284	A	G	A	19	18,1	G	16	0,16	A	25	25,0	R	8	2,6	R	25	7,18	G	15	0,15	G	11	0,11	R	45	25,20	R	17	6,11	A	21	21,0	R	14	10,4	R	11	5,6	R	43	14,29	A	24	24,0	R	26
Marker71826	122.631	Cma_Chr03	6233504	A	G	A	10	10,0	G	15	0,15	A	23	23,0	G	25	0,25	R	100	53,47	G	34	0,34	G	80	0,80	R	55	16,39	R	39	16,23	A	49	48,1	R	46	15,31	R	48	22,26	R	78	26,52	A	58	58,0	R	63
Marker72124	123.631	Cma_Chr03	6357055	T	C	T	17	16,1	C	19	0,19	T	23	23,0	C	27	0,27	Y	12	6,6	C	18	0,18	C	22	0,22	Y	15	7,8	Y	42	24,18	T	64	64,0	Y	24	9,15	Y	25	10,15	Y	36	24,11	T	18	18,0	Y	10
Marker72259	124.131	Cma_Chr03	6481221	T	C	T	20	20,0	C	16	0,16	T	12	12,0	C	9	0,9	Y	25	15,10	C	11	0,11	C	27	0,27	Y	15	9,6	Y	27	12,15	T	29	29,0	Y	23	11,12	Y	13	9,4	Y	20	7,13	T	25	23,1	Y	13
Marker72120	125.131	Cma_Chr03	6355402	T	C	T	11	11,0	C	19	0,19	T	11	11,0	C	9	0,9	Y	9	1,8	C	13	0,13	C	21	0,21	Y	13	4,9	Y	23	8,15	T	26	26,0	Y	22	14,8	C	9	0,9	Y	11	7,4	T	14	14,0	Y	13
Marker72324	127.734	Cma_Chr03	6559270	A	C	C	19	0,19	A	22	22,0	C	14	0,14	A	7	7,0	M	6	5,1	A	28	26,2	M	12	10,2	M	19	11,8	M	25	7,18	C	15	0,15	M	24	12,12	M	9	1,8	M	17	9,8	C	31	0,31	M	16
Marker72445	130.542	Cma_Chr03	6624849	C	A	C	18	17,1	A	15	0,15	C	24	24,0	A	24	0,24	M	74	55,19	A	30	1,29	M	49	18,31	M	45	24,21	M	73	36,37	C	81	79,2	M	59	34,25	M	27	18,9	M	70	36,34	C	60	59,0	M	46
Marker72446	130.542	Cma_Chr03	6624884	A	G	A	18	18,0	G	17	0,17	A	24	24,0	G	24	0,24	R	74	55,19	G	30	1,29	R	49	18,31	R	45	24,21	R	73	36,37	A	81	79,2	R	59	34,25	R	27	18,9	R	70	37,33	A	60	59,1	R	46
Marker72521	134.248	Cma_Chr03	6774643	T	G	T	15	15,0	G	24	0,24	T	7	7,0	N	.	.	K	6	3,3	G	5	0,5	K	8	1,7	T	10	10,0	K	4	1,3	T	32	32,0	K	10	7,3	T	2	2,0	K	5	3,2	T	7	7,0	K	6
Marker72536	135.249	Cma_Chr03	6780293	T	C	T	13	13,0	C	20	0,20	T	67	65,2	C	45	0,45	Y	245	108,136	C	73	3,70	Y	170	82,88	T	114	114,0	Y	135	63,72	T	57	56,1	Y	123	57,66	Y	75	31,44	Y	250	137,113	T	178	176,2	Y	73
Marker72543	135.249	Cma_Chr03	6781362	C	A	C	16	15,1	A	19	0,19	C	46	44,2	A	34	0,34	M	79	37,42	A	38	1,37	M	47	19,28	C	31	30,1	M	65	43,22	C	60	60,0	M	58	36,22	M	35	15,20	M	59	32,27	C	35	33,2	M	28
Marker72857	138.353	Cma_Chr03	7011421	A	G	G	21	0,21	A	19	19,0	G	6	0,6	A	7	7,0	R	15	9,6	A	8	8,0	R	14	7,7	G	7	0,7	R	23	14,9	G	13	0,13	R	12	7,5	R	5	4,1	R	8	2,6	G	19	0,19	R	10
Marker73101	139.353	Cma_Chr03	7137132	C	T	T	18	0,18	C	13	13,0	T	1	0,1	C	4	4,0	Y	13	3,10	C	1	1,0	Y	7	4,3	T	3	0,3	Y	15	3,12	T	21	1,20	Y	10	7,3	Y	12	4,8	Y	8	6,2	T	13	0,13	Y	9
Marker73589	139.853	Cma_Chr03	7381758	G	C	G	15	14,1	C	19	0,19	G	29	29,0	S	15	12,2	S	38	26,12	C	22	1,21	S	23	15,8	S	17	8,8	S	28	20,8	G	26	25,1	S	34	17,17	S	38	22,16	S	27	9,18	G	22	22,0	S	29
Marker73834	139.853	Cma_Chr03	7419330	C	A	C	12	12,0	A	15	0,15	C	13	13,0	M	23	14,9	M	84	37,47	A	12	0,12	M	44	14,30	M	35	5,30	M	30	11,19	C	31	31,0	M	64	22,42	M	57	23,34	M	96	41,55	C	86	86,0	M	26
Marker73647	139.853	Cma_Chr03	7389869	G	A	G	14	14,0	A	15	0,15	G	9	9,0	R	13	5,8	R	20	11,9	A	7	0,7	R	25	21,4	G	6	6,0	R	14	10,4	G	15	15,0	R	15	9,6	R	13	7,6	R	18	8,10	G	16	16,0	R	8
Marker73578	139.853	Cma_Chr03	7379581	T	C	T	13	13,0	C	18	2,16	T	5	5,0	Y	4	2,2	Y	14	4,10	C	8	0,8	Y	14	11,3	Y	13	3,10	Y	14	8,6	Y	9	8,1	Y	16	6,10	Y	9	5,4	Y	9	3,6	T	35	35,0	Y	27
Marker73390	139.853	Cma_Chr03	7284623	C	T	T	12	0,12	C	21	21,0	T	14	1,13	T	1	0,1	Y	27	16,11	C	3	3,0	Y	21	16,5	Y	11	9,2	Y	18	7,11	T	1	0,1	Y	14	2,12	Y	14	8,6	Y	23	10,13	T	29	0,29	Y	11
Marker73360	140.353	Cma_Chr03	7276764	C	T	C	13	13,0	T	21	0,21	C	17	17,0	Y	15	10,5	Y	38	17,21	T	34	0,34	Y	19	8,11	Y	19	12,7	Y	19	10,9	C	19	19,0	Y	30	15,15	Y	16	14,2	Y	30	22,8	C	26	26,0	Y	24
Marker73303	140.853	Cma_Chr03	7259748	C	G	C	20	19,1	G	12	0,12	C	4	4,0	S	4	2,2	S	7	3,4	G	2	0,2	S	6	2,4	C	15	15,0	S	6	2,4	C	15	15,0	S	6	1,5	S	7	4,3	C	8	8,0	C	14	14,0	G	4
Marker72972	140.853	Cma_Chr03	7043977	T	G	G	14	0,14	T	14	14,0	G	17	0,17	K	5	1,4	K	25	9,16	T	17	17,0	K	15	9,6	G	19	0,19	K	22	9,13	G	93	0,93	K	48	30,18	K	14	8,6	K	10	8,2	G	10	0,10	K	16
Marker72973	140.853	Cma_Chr03	7044029	A	G	G	23	1,22	A	13	13,0	G	17	0,17	G	5	1,4	R	25	9,16	A	17	16,0	R	14	9,5	G	19	0,19	R	22	9,13	G	93	0,92	R	48	30,18	R	14	8,6	R	10	8,2	G	10	0,10	R	16
Marker72934	140.853	Cma_Chr03	7037922	A	G	G	15	0,15	A	17	17,0	G	19	1,18	R	26	5,21	R	59	20,39	R	20	16,4	R	44	26,18	G	26	0,26	R	52	29,23	G	97	2,95	R	46	23,23	R	17	2,15	R	75	26,49	G	87	0,87	R	46
Marker73386	141.853	Cma_Chr03	7283362	A	G	G	18	0,18	A	26	26,0	G	10	0,10	R	14	8,6	R	30	18,12	A	19	19,0	R	24	14,10	R	27	17,10	R	41	33,8	R	10	1,9	R	22	19,3	R	7	6,1	R	33	29,4	R	18	5,13	R	10
Marker73316	142.353	Cma_Chr03	7269511	A	G	A	13	13,0	G	14	0,14	A	7	7,0	R	17	13,4	R	9	5,4	G	7	0,7	R	13	7,6	R	17	7,10	R	13	3,10	A	67	67,0	R	15	10,5	R	11	7,4	R	33	13,20	A	21	21,0	R	6
Marker74126	142.853	Cma_Chr03	7475722	G	A	G	15	14,1	A	20	0,20	G	5	5,0	G	3	3,0	R	24	13,11	A	1	0,1	R	21	8,13	R	10	7,3	R	11	7,4	R	4	3,1	R	7	5,2	R	18	5,13	R	24	13,11	G	41	41,0	R	18
Marker73989	142.853	Cma_Chr03	7443246	C	T	C	16	15,1	T	11	0,11	C	55	55,0	Y	29	13,16	Y	73	51,22	Y	34	3,31	Y	82	60,22	Y	40	25,15	Y	43	23,20	C	39	39,0	Y	46	21,25	Y	56	33,23	Y	93	69,24	C	131	130,1	Y	52
Marker73708	142.853	Cma_Chr03	7396794	T	C	T	12	12,0	C	15	0,15	T	7	7,0	Y	7	5,2	Y	4	3,1	C	1	0,1	Y	7	2,5	Y	6	1,5	Y	10	1,9	T	18	18,0	Y	14	10,4	Y	7	4,3	Y	9	2,7	Y	11	10,1	Y	7
Marker74127	142.853	Cma_Chr03	7475733	G	T	G	15	14,1	T	22	0,22	G	5	5,0	G	3	3,0	K	24	13,11	T	1	0,1	K	21	8,13	K	10	7,3	K	11	7,4	K	4	3,1	K	7	5,2	K	18	5,13	K	24	13,11	G	41	41,0	K	18
Marker74166	142.853	Cma_Chr03	7487461	A	G	A	13	13,0	G	14	0,14	A	19	19,0	R	9	3,6	R	49	24,25	G	16	0,16	R	36	15,21	R	29	17,12	R	41	21,20	A	29	29,0	R	49	27,22	R	16	3,13	R	34	15,19	A	61	61,0	R	12
Marker74167	142.853	Cma_Chr03	7487468	G	A	G	12	12,0	A	13	0,13	G	19	19,0	R	9	3,6	R	49	24,25	A	16	0,16	R	36	15,21	R	29	17,12	R	41	19,21	G	29	29,0	R	49	27,22	R	16	3,13	R	34	14,18	G	60	60,0	R	12
Marker73985	142.853	Cma_Chr03	7442611	C	A	C	22	21,1	A	18	0,18	C	13	13,0	M	10	7,3	M	7	2,5	A	9	0,9	A	11	0,11	M	13	3,10	M	10	6,4	C	24	24,0	M	8	1,7	C	1	1,0	M	11	2,9	C	9	9,0	M	9
Marker73986	142.853	Cma_Chr03	7442620	T	C	T	22	21,1	C	18	0,18	T	13	13,0	Y	10	7,3	Y	7	2,5	C	9	0,9	C	11	0,11	Y	13	3,10	Y	10	6,4	T	24	24,0	Y	8	1,7	T	1	1,0	Y	11	2,9	T	9	9,0	Y	9
Marker73505	142.853	Cma_Chr03	7332552	T	A	T	19	19,0	A	21	0,21	T	9	9,0	W	6	5,1	W	13	3,10	A	5	0,5	A	2	0,2	A	3	0,3	W	7	6,1	T	23	23,0	W	16	9,7	W	5	4,1	W	16	4,12	T	9	9,0	A	31
Marker74072	143.353	Cma_Chr03	7462413	G	T	G	21	21,0	T	14	0,14	G	16	16,0	K	21	11,10	K	13	12,1	T	20	0,20	K	15	2,13	K	9	8,1	K	23	11,12	G	36	36,0	K	14	12,2	G	13	13,0	K	30	20,10	G	20	20,0	K	10
Marker74074	143.353	Cma_Chr03	7462584	G	C	G	16	15,1	C	17	0,17	G	16	16,0	S	21	11,10	G	14	13,1	C	21	0,21	S	15	2,13	S	9	8,1	S	23	11,12	G	36	36,0	S	14	12,2	G	13	13,0	S	30	20,10	G	20	18,0	S	10
Marker74075	143.353	Cma_Chr03	7462600	G	C	G	17	16,1	C	16	0,16	G	16	16,0	S	21	11,10	G	14	13,1	C	21	0,21	S	15	2,13	S	9	8,1	S	23	11,12	G	36	36,0	S	14	12,2	G	13	13,0	S	30	20,10	G	20	20,0	S	10
Marker74076	143.353	Cma_Chr03	7462606	A	G	A	18	17,1	G	15	0,15	A	16	16,0	R	21	11,10	R	14	13,1	G	21	0,21	R	15	2,13	R	9	8,1	R	23	11,12	A	36	36,0	R	14	12,2	A	13	13,0	R	30	20,10	A	20	20,0	R	10
Marker73193	143.353	Cma_Chr03	7166714	C	T	C	15	14,1	T	19	0,19	C	15	15,0	Y	8	5,3	Y	10	6,4	T	24	0,24	Y	8	2,6	C	10	10,0	Y	29	19,10	C	26	26,0	Y	20	9,11	Y	5	4,1	Y	12	7,5	C	28	28,0	Y	8
Marker74061	144.353	Cma_Chr03	7458726	A	G	A	16	16,0	G	23	0,23	A	5	5,0	R	4	2,2	R	22	10,12	G	10	0,10	R	7	3,4	R	8	3,5	R	25	14,11	A	41	41,0	R	21	11,10	G	2	0,2	R	12	8,4	A	16	16,0	R	10
Marker74143	144.853	Cma_Chr03	7478612	C	T	T	15	0,15	C	16	16,0	T	15	0,15	Y	12	6,6	Y	28	12,16	C	24	24,0	Y	31	11,20	Y	10	5,5	Y	45	23,21	T	23	0,23	Y	48	25,23	Y	23	10,13	Y	40	22,18	T	49	0,49	Y	22
Marker74444	144.853	Cma_Chr03	7553079	T	C	T	18	16,2	C	18	0,18	Y	3	2,1	T	3	3,0	C	5	0,5	C	3	0,3	T	5	5,0	Y	8	4,4	C	1	0,1	T	7	7,0	Y	6	4,1	N	.	.	Y	17	7,10	T	5	5,0	Y	4
Marker74224	144.853	Cma_Chr03	7505897	G	A	G	14	14,0	A	23	0,23	G	11	11,0	R	8	1,7	R	22	16,6	A	20	0,20	R	25	9,16	R	18	9,9	R	34	22,12	R	7	6,1	R	19	4,15	R	10	5,5	R	47	16,31	G	31	31,0	R	20
Marker74492	145.353	Cma_Chr03	7565369	T	C	T	11	11,0	C	18	0,18	T	34	34,0	Y	18	9,9	Y	91	42,49	C	27	0,27	T	43	43,0	Y	47	23,24	Y	43	25,18	T	20	19,1	Y	36	8,28	Y	27	9,18	Y	58	31,27	T	44	44,0	Y	29
Marker74493	145.353	Cma_Chr03	7565410	T	C	T	11	11,0	C	15	0,15	T	34	34,0	Y	18	9,9	Y	91	42,49	C	27	0,27	T	43	43,0	Y	47	23,23	Y	43	25,18	T	20	18,2	Y	36	8,28	Y	27	9,18	Y	58	31,27	T	44	44,0	Y	29
Marker74293	145.853	Cma_Chr03	7519137	A	G	A	17	16,1	G	20	0,20	A	22	21,0	R	7	3,4	R	37	16,21	G	30	0,30	A	19	19,0	R	29	14,15	R	46	29,17	A	31	30,0	R	66	35,30	R	27	20,7	R	34	19,14	A	47	45,0	R	25
Marker74702	146.353	Cma_Chr03	7596061	T	C	T	19	18,1	C	22	0,22	T	23	23,0	C	8	0,8	Y	38	15,23	C	16	1,15	T	17	17,0	Y	14	10,4	Y	16	2,14	T	14	14,0	Y	10	3,7	Y	24	3,21	Y	23	14,9	T	21	20,1	Y	28
Marker74666	146.353	Cma_Chr03	7584345	A	C	A	16	16,0	C	22	0,22	A	8	8,0	A	1	1,0	M	12	6,6	C	9	0,9	A	12	12,0	M	7	3,4	M	16	8,8	A	4	4,0	M	5	2,3	M	13	5,8	M	12	7,5	A	15	15,0	M	12
Marker74287	146.853	Cma_Chr03	7517699	T	G	T	22	21,1	G	17	0,17	T	43	43,0	K	18	5,13	K	26	5,21	G	18	0,18	T	43	43,0	K	20	11,9	K	31	15,16	T	32	32,0	K	43	22,21	K	10	4,6	K	39	10,29	T	29	29,0	K	13
Marker74835	148.454	Cma_Chr03	7645665	C	A	A	10	0,10	C	17	17,0	M	11	2,9	M	7	2,5	M	19	14,5	C	2	2,0	A	14	0,14	M	20	6,14	M	9	5,4	A	7	0,7	M	11	3,8	M	10	8,2	M	23	15,8	A	10	0,10	M	14
Marker75747	148.954	Cma_Chr03	7914922	T	C	T	17	16,1	C	13	0,13	T	14	14,0	Y	15	8,7	Y	10	5,5	C	10	0,10	T	18	18,0	Y	18	3,15	Y	31	20,11	T	50	48,1	Y	23	7,16	Y	6	1,5	Y	9	3,6	Y	11	9,2	Y	9
Marker74923	148.954	Cma_Chr03	7740336	G	A	G	15	14,1	A	15	0,15	G	22	22,0	R	9	3,6	R	24	18,6	A	18	0,18	G	19	19,0	R	27	14,13	R	47	23,24	G	20	20,0	R	22	14,8	R	7	5,2	R	39	29,10	R	27	17,10	R	20
Marker74924	148.954	Cma_Chr03	7740399	A	G	A	14	14,0	G	19	0,19	A	22	22,0	R	9	3,6	R	24	18,6	G	18	0,18	A	19	19,0	R	27	14,13	R	47	23,24	A	20	20,0	R	22	14,8	R	7	5,2	R	39	29,10	R	27	17,10	R	20
Marker75334	148.954	Cma_Chr03	7836445	T	C	T	17	16,1	C	13	0,13	T	30	30,0	Y	55	14,41	Y	104	52,52	C	32	1,31	T	74	74,0	Y	47	30,17	Y	52	30,22	T	31	30,1	Y	63	17,46	Y	42	19,23	Y	107	44,63	Y	94	38,56	Y	53
Marker75530	149.454	Cma_Chr03	7876609	A	G	A	10	10,0	G	23	1,22	A	9	9,0	N	.	.	R	14	2,12	G	14	0,14	A	22	22,0	G	4	0,4	R	16	9,7	R	11	10,1	G	4	0,4	R	10	2,8	G	1	0,1	R	17	13,4	R	13
Marker75273	150.454	Cma_Chr03	7825944	C	T	C	13	13,0	T	17	0,17	C	6	6,0	T	4	0,4	T	3	0,3	T	7	0,7	C	14	14,0	Y	6	1,5	Y	5	4,1	C	20	20,0	Y	8	4,4	Y	10	2,8	Y	11	5,6	T	5	0,5	C	2
Marker75708	152.054	Cma_Chr03	7905215	C	T	C	17	16,1	T	15	0,15	C	6	6,0	C	4	2,2	Y	10	5,5	T	2	0,2	C	12	12,0	Y	4	1,2	Y	4	2,2	C	31	31,0	Y	12	4,7	N	.	.	T	8	0,8	Y	3	2,1	T	4
Marker75709	152.554	Cma_Chr03	7905256	T	C	T	18	17,1	C	12	0,12	T	6	6,0	Y	4	2,2	Y	10	5,5	C	2	0,2	T	13	13,0	Y	4	2,2	Y	4	2,2	T	31	31,0	Y	12	5,7	C	2	1,1	C	8	0,8	Y	4	3,1	C	4
Marker75710	152.554	Cma_Chr03	7905298	G	A	G	15	15,0	A	19	0,19	G	6	5,0	R	4	2,2	R	10	5,5	A	2	0,2	G	13	13,0	R	4	1,3	R	4	2,2	G	31	31,0	R	12	5,7	R	2	1,1	A	8	0,8	R	4	3,1	A	4
Marker76258	156.478	Cma_Chr03	8449914	T	C	C	13	0,13	T	15	15,0	C	9	0,9	Y	23	18,5	Y	18	11,7	T	15	14,1	C	25	0,25	Y	16	13,3	Y	6	1,5	T	29	29,0	T	8	8,0	C	2	0,2	Y	9	4,5	Y	4	1,3	Y	12
Marker76259	156.478	Cma_Chr03	8449976	G	C	C	12	0,12	G	11	11,0	C	9	0,9	S	23	18,5	S	18	11,7	G	15	14,1	C	25	0,25	S	16	13,3	S	6	1,5	G	29	29,0	G	8	8,0	C	2	0,2	S	9	4,5	S	4	1,3	S	12
Marker76260	157.478	Cma_Chr03	8449983	T	G	G	12	0,12	T	10	10,0	G	9	0,9	K	23	18,5	K	18	11,7	T	15	14,1	G	25	0,25	K	16	13,3	K	6	1,5	T	29	29,0	T	8	8,0	G	2	0,2	K	9	4,5	K	4	1,3	K	12
Marker76417	159.479	Cma_Chr03	8488312	T	C	C	16	0,16	T	19	19,0	C	6	0,6	Y	3	2,1	Y	14	4,10	T	12	12,0	C	12	0,11	Y	15	6,9	Y	21	5,16	T	61	61,0	T	20	20,0	Y	10	1,9	Y	11	3,8	Y	23	10,13	T	13
Marker76418	159.479	Cma_Chr03	8488327	T	C	C	11	0,11	T	19	19,0	C	6	0,6	Y	3	2,1	Y	14	4,10	T	12	12,0	C	12	0,12	Y	15	6,9	Y	21	5,16	T	62	62,0	T	20	20,0	Y	10	1,9	Y	11	3,8	Y	23	9,13	T	13
Marker76419	159.479	Cma_Chr03	8488359	A	G	G	10	0,10	A	18	18,0	G	6	0,6	R	3	2,1	R	14	4,10	A	12	12,0	G	12	0,12	R	15	6,9	R	21	5,16	A	63	63,0	A	20	20,0	R	10	1,9	R	11	3,8	R	23	10,13	A	13
Marker76239	159.479	Cma_Chr03	8442776	A	G	G	17	1,16	A	26	26,0	G	14	0,14	R	5	1,4	R	12	7,5	A	7	7,0	G	19	0,19	R	4	1,2	R	10	6,4	A	26	26,0	A	7	7,0	R	7	6,1	A	5	5,0	R	13	8,5	A	6
Marker76654	159.479	Cma_Chr03	8522168	T	C	C	11	0,11	T	18	18,0	Y	6	1,5	Y	4	3,1	Y	16	7,9	T	8	8,0	C	9	0,9	Y	12	7,5	Y	15	3,12	T	20	20,0	T	10	10,0	Y	16	9,7	Y	3	2,1	Y	14	7,7	T	10
Marker76659	159.479	Cma_Chr03	8522416	C	T	T	12	0,12	C	14	14,0	Y	6	1,5	Y	4	3,1	Y	16	7,9	C	8	8,0	T	9	0,9	Y	12	7,5	Y	15	3,12	C	20	20,0	C	10	10,0	Y	16	9,7	Y	3	2,1	Y	14	7,7	C	10
Marker76343	159.979	Cma_Chr03	8473511	G	A	A	15	0,15	G	19	19,0	A	54	1,53	R	56	33,23	R	152	57,95	G	79	79,0	A	142	1,141	R	79	32,47	R	80	44,36	G	92	92,0	G	106	105,1	R	79	40,39	R	145	81,64	R	173	74,99	G	68
Marker76288	159.979	Cma_Chr03	8454251	G	A	A	13	0,13	G	14	14,0	A	16	1,15	R	14	6,8	R	37	9,27	G	31	30,1	A	50	0,50	R	24	9,15	R	35	20,15	G	10	10,0	G	37	37,0	R	19	9,10	R	36	12,24	R	28	15,13	G	24
Marker76289	159.979	Cma_Chr03	8454280	C	T	T	15	0,15	C	15	15,0	T	16	1,15	Y	14	6,8	Y	37	9,28	C	31	30,1	T	50	0,50	Y	24	9,15	Y	35	20,15	C	10	10,0	C	37	37,0	Y	19	9,10	Y	36	12,24	Y	28	15,13	C	24
Marker76313	159.979	Cma_Chr03	8464883	C	A	A	15	0,15	C	13	13,0	A	21	1,20	M	26	11,15	M	94	48,46	C	34	34,0	A	115	1,114	M	63	25,38	M	42	25,16	C	30	30,0	C	49	49,0	M	55	22,32	M	113	52,61	M	92	43,49	C	68
Marker76314	159.979	Cma_Chr03	8464890	G	A	A	15	0,15	G	14	14,0	A	21	1,20	R	26	10,16	R	94	47,46	G	34	34,0	A	115	3,112	R	63	25,36	R	42	25,17	G	30	29,1	G	49	49,0	R	55	23,32	R	113	52,61	R	92	43,49	G	68
Marker76064	159.979	Cma_Chr03	8332587	A	C	A	15	15,0	C	20	0,20	A	11	11,0	M	21	5,16	M	25	14,11	C	11	0,11	A	35	35,0	M	18	5,13	M	13	6,7	M	19	9,10	C	37	0,37	M	19	9,10	M	33	18,15	M	23	17,6	C	18
Marker75862	159.979	Cma_Chr03	8207879	C	T	T	19	2,17	C	18	18,0	T	19	0,19	Y	17	13,4	Y	19	6,13	Y	12	11,1	T	27	0,27	Y	19	13,6	Y	24	10,14	Y	41	13,28	C	23	23,0	Y	13	5,8	Y	27	6,21	Y	21	9,12	Y	11
Marker75963	159.979	Cma_Chr03	8311847	A	G	A	12	12,0	G	10	0,10	R	10	9,1	A	4	4,0	R	8	4,4	G	5	0,5	A	9	9,0	G	1	0,1	R	11	5,6	R	22	16,6	G	11	0,11	R	5	1,4	R	7	3,4	R	12	6,6	G	9
Marker75965	159.979	Cma_Chr03	8312002	A	G	A	11	11,0	G	12	0,12	A	9	9,0	A	4	4,0	R	9	5,4	G	5	0,5	A	8	8,0	G	1	0,1	R	11	5,6	R	21	16,5	G	11	0,11	R	5	1,4	R	6	3,3	R	12	6,6	G	9
Marker76100	159.979	Cma_Chr03	8365366	A	T	A	12	12,0	T	13	0,13	A	18	18,0	W	11	9,2	W	25	15,10	T	12	0,12	A	14	14,0	W	22	16,6	W	35	16,19	T	23	0,23	T	17	0,17	W	14	9,5	W	7	4,3	W	31	20,11	T	9
Marker76391	159.979	Cma_Chr03	8484694	G	A	A	17	1,16	G	18	18,0	A	8	0,8	R	22	15,7	R	26	19,7	G	18	18,0	A	27	0,27	R	20	13,7	R	23	7,16	G	13	13,0	G	12	12,0	R	14	2,12	R	24	11,13	R	12	3,9	G	14
Marker76392	159.979	Cma_Chr03	8484732	A	G	G	16	1,15	A	18	18,0	G	8	0,8	R	22	15,7	R	26	19,7	A	18	18,0	G	27	0,27	R	20	13,7	R	24	7,17	A	13	13,0	A	12	12,0	R	14	2,12	R	24	11,13	R	12	3,9	A	14
Marker76058	159.979	Cma_Chr03	8331193	T	C	T	18	17,1	C	29	0,29	Y	12	11,1	Y	9	2,7	Y	16	9,7	C	9	0,9	T	14	14,0	Y	7	3,4	Y	15	8,7	Y	23	11,12	C	4	0,4	Y	14	5,9	Y	7	2,5	Y	15	6,9	C	12
Marker76060	159.979	Cma_Chr03	8331463	A	T	A	17	16,1	T	17	0,17	A	11	11,0	W	9	2,7	W	16	9,7	T	9	0,9	A	14	14,0	W	7	3,4	W	15	8,7	W	22	10,12	T	4	0,4	W	13	4,9	W	7	2,5	W	15	5,9	T	12
Marker76921	161.98	Cma_Chr03	8650906	T	G	T	17	16,1	G	20	0,20	T	12	12,0	K	3	2,1	K	6	4,2	G	12	0,12	T	18	18,0	K	18	7,11	K	15	5,10	G	20	1,19	G	8	0,8	K	5	4,1	K	17	9,8	G	17	0,17	G	9
Marker76784	161.98	Cma_Chr03	8615455	C	T	T	14	0,14	C	12	12,0	Y	12	1,11	Y	13	5,8	Y	12	4,8	C	8	8,0	T	13	0,13	Y	10	8,2	Y	18	7,11	C	20	20,0	C	19	19,0	Y	15	8,7	Y	6	3,3	Y	10	9,1	C	5
Marker76798	161.98	Cma_Chr03	8620566	A	C	C	11	0,11	A	15	15,0	C	24	1,23	M	34	12,22	M	74	35,39	A	29	27,2	C	60	1,59	M	35	12,23	M	63	26,37	M	21	19,2	A	64	64,0	M	34	16,18	M	76	41,35	A	65	65,0	A	40
Marker76893	162.48	Cma_Chr03	8648053	T	C	C	15	0,15	T	12	12,0	C	2	0,2	Y	9	2,7	Y	11	4,7	T	5	5,0	C	2	0,2	T	4	4,0	Y	14	8,6	T	29	29,0	T	5	5,0	Y	4	1,3	Y	6	3,3	T	12	12,0	T	4
Marker76892	162.98	Cma_Chr03	8647985	G	A	A	17	0,17	G	11	11,0	A	2	0,2	R	9	2,7	R	11	4,7	G	5	5,0	A	2	0,2	G	4	4,0	R	14	8,6	G	29	29,0	G	5	5,0	R	4	1,3	R	6	3,3	G	12	12,0	G	4
Marker76895	163.48	Cma_Chr03	8648218	G	A	A	19	0,19	G	21	21,0	A	3	0,3	R	9	2,7	R	11	4,7	G	5	5,0	A	2	0,1	G	4	4,0	R	14	8,6	G	30	30,0	G	5	5,0	R	4	1,3	R	6	3,3	G	12	12,0	G	4
Marker77394	166.083	Cma_Chr03	9180368	C	T	C	15	14,1	T	13	0,13	Y	4	3,1	Y	9	4,5	Y	27	11,16	T	3	0,3	C	10	10,0	Y	15	8,7	Y	20	6,14	T	7	0,7	T	7	0,7	T	20	1,19	Y	37	14,23	T	29	0,29	T	30
Marker77398	166.083	Cma_Chr03	9180629	G	A	G	10	10,0	A	20	0,20	R	4	3,1	R	9	4,5	R	28	12,16	A	3	0,3	G	10	10,0	R	14	7,7	R	19	6,13	A	7	0,7	A	7	0,7	A	20	1,19	R	37	14,23	A	29	0,29	A	30
Marker77142	166.583	Cma_Chr03	9061361	A	G	A	20	19,1	G	18	0,18	R	8	3,5	G	5	0,5	R	43	26,17	A	3	3,0	A	25	24,1	R	12	11,1	R	43	23,20	G	13	0,13	G	15	0,15	G	11	0,11	R	14	9,5	G	55	0,55	G	38
Marker77625	167.583	Cma_Chr03	9228430	C	T	C	11	11,0	T	14	0,14	Y	11	7,4	Y	12	5,7	Y	20	9,11	Y	12	8,4	C	17	17,0	Y	24	9,15	Y	31	19,12	T	15	0,15	T	18	0,18	T	10	0,10	Y	12	6,6	T	14	0,14	Y	9
Marker77642	168.083	Cma_Chr03	9232627	T	C	T	10	10,0	C	17	0,17	Y	18	6,12	Y	30	18,12	Y	60	30,30	Y	36	17,19	T	30	29,1	Y	25	10,15	Y	66	31,35	C	20	0,20	C	59	1,58	C	42	1,41	Y	64	25,39	C	59	1,58	C	36
Marker77289	168.583	Cma_Chr03	9105914	G	C	G	16	16,0	C	18	0,18	S	14	10,4	S	23	4,19	S	30	22,8	S	22	9,13	G	30	30,0	S	16	8,8	S	27	14,12	C	32	0,32	C	23	0,23	C	15	0,15	S	26	9,16	C	21	0,21	C	29
Marker77087	168.583	Cma_Chr03	9049461	C	T	C	20	20,0	T	13	0,13	Y	6	4,2	Y	8	3,5	Y	3	1,2	Y	12	4,8	C	5	5,0	Y	13	6,7	Y	18	3,15	T	20	0,20	T	7	0,7	T	16	0,16	Y	9	7,2	T	10	0,10	N	.
Marker77319	168.583	Cma_Chr03	9119509	G	A	G	17	16,1	A	18	0,18	R	6	3,3	R	8	4,4	R	13	3,10	R	10	5,5	G	11	11,0	R	8	2,6	R	14	10,4	A	24	0,24	A	31	1,30	A	7	0,7	R	16	13,3	A	18	0,18	A	12
Marker77074	169.093	Cma_Chr03	9046120	G	A	G	17	16,1	A	28	2,26	R	12	7,5	R	11	5,6	R	7	3,4	R	4	1,3	G	29	29,0	R	10	9,1	R	9	2,7	A	52	0,52	A	6	0,6	A	2	0,2	G	5	5,0	A	7	0,7	R	2
Marker77075	169.093	Cma_Chr03	9046145	C	G	C	18	17,1	G	22	0,22	S	12	7,5	S	11	5,6	S	7	3,4	S	4	1,3	C	29	29,0	S	10	9,1	S	9	2,7	G	52	0,52	G	6	0,6	G	2	0,2	C	5	5,0	G	7	0,7	S	2
Marker77322	169.093	Cma_Chr03	9120688	G	A	G	14	14,0	A	17	0,17	R	48	21,27	R	51	28,23	R	116	53,63	R	62	31,31	G	108	106,1	R	74	39,35	R	133	75,58	A	70	1,68	A	82	0,82	A	56	0,56	R	97	41,56	A	100	1,99	R	74
Marker77313	169.093	Cma_Chr03	9118898	G	A	G	15	15,0	A	22	0,22	R	37	28,9	R	17	10,7	R	46	22,24	R	34	20,14	G	85	85,0	R	13	10,3	R	43	13,30	A	41	0,41	A	23	1,22	A	18	0,18	R	90	50,40	A	36	1,35	A	42
Marker77369	169.093	Cma_Chr03	9154238	A	G	A	15	14,1	G	15	0,15	R	5	2,3	R	9	8,1	R	37	23,12	R	17	10,7	A	37	36,1	R	26	16,10	R	53	22,31	G	16	0,16	G	35	1,34	R	9	1,8	R	39	19,20	G	36	0,36	G	32
Marker77248	169.093	Cma_Chr03	9095142	A	C	A	15	14,1	C	14	0,14	M	8	2,6	M	15	3,12	M	33	14,19	M	17	13,4	A	27	27,0	M	39	5,34	M	48	33,15	M	33	3,30	C	37	0,37	C	13	0,13	M	36	13,23	C	57	1,56	C	44
Marker77447	169.593	Cma_Chr03	9191547	C	A	C	17	16,1	A	20	0,20	M	17	14,3	M	10	2,8	M	12	6,6	M	7	4,3	C	11	11,0	M	14	5,9	M	10	5,5	A	29	0,29	A	21	0,21	M	7	1,6	A	5	0,5	A	14	0,14	A	9
Marker77448	169.593	Cma_Chr03	9191611	A	G	A	15	15,0	G	22	0,22	R	17	14,3	R	10	2,8	R	12	6,6	R	7	4,3	A	11	11,0	R	14	5,9	R	10	5,5	G	29	0,29	G	21	0,21	R	7	1,6	G	5	0,5	G	14	0,14	G	10
Marker77639	169.593	Cma_Chr03	9230825	A	G	A	12	12,0	G	22	0,22	R	12	9,3	R	7	4,3	R	28	13,15	R	22	12,10	A	44	44,0	R	23	16,7	R	22	9,13	G	22	0,22	G	18	0,18	G	15	0,15	R	9	6,3	G	14	0,14	G	5
Marker77496	169.593	Cma_Chr03	9201173	C	T	C	26	25,1	T	20	0,20	Y	8	4,4	Y	7	3,4	Y	6	3,3	Y	8	5,3	C	19	19,0	Y	13	8,5	Y	5	2,3	T	24	0,24	T	11	0,11	T	2	0,2	Y	4	1,3	Y	14	2,12	T	1
Marker77623	169.593	Cma_Chr03	9228031	G	T	G	22	22,0	T	18	0,18	K	7	6,1	G	7	7,0	K	10	1,9	K	18	16,2	G	16	16,0	K	19	5,14	K	22	6,16	T	10	0,10	T	15	0,15	T	13	0,13	K	14	6,7	T	15	0,15	T	17
Marker77678	169.593	Cma_Chr03	9420685	A	T	A	21	20,1	T	14	0,14	W	22	10,11	W	12	2,10	W	53	19,34	W	34	23,11	A	54	53,1	W	21	14,7	W	37	21,16	T	43	1,42	T	31	0,31	T	38	0,38	W	48	26,22	T	38	0,38	T	20
Marker78596	0	Cma_Chr04	487297	G	T	G	17	16,1	T	25	0,25	K	14	8,6	G	9	9,0	T	28	0,28	T	2	0,2	G	8	8,0	K	18	11,7	T	10	0,10	K	13	7,6	K	21	12,9	G	11	11,0	K	17	7,10	K	8	7,1	G	4
Marker78416	0.705	Cma_Chr04	435693	G	A	G	17	16,1	A	17	0,17	R	16	9,7	G	22	22,0	A	25	0,25	A	13	0,13	G	18	18,0	R	8	4,4	A	13	0,13	R	19	12,7	R	23	8,15	G	14	14,0	R	18	11,7	G	16	16,0	G	9
Marker78581	0.705	Cma_Chr04	481416	T	A	T	16	16,0	A	18	0,18	A	9	0,9	T	14	14,0	A	80	0,80	A	27	0,27	T	22	22,0	W	20	10,10	A	24	1,23	W	7	4,3	W	39	24,15	T	41	41,0	W	74	40,34	T	123	121,2	T	21
Marker77688	2.706	Cma_Chr04	206980	G	T	G	20	19,1	T	18	0,18	G	16	16,0	G	26	24,2	T	72	0,72	T	40	0,40	G	74	74,0	K	48	21,27	T	77	0,77	K	30	19,11	K	73	28,45	G	32	32,0	K	58	34,24	G	53	52,1	G	30
Marker78376	2.706	Cma_Chr04	421332	G	A	A	20	1,19	G	14	14,0	R	19	11,8	A	10	0,10	G	41	41,0	G	21	21,0	A	37	0,37	R	24	12,12	G	33	33,0	R	29	11,18	R	32	15,16	A	24	0,23	R	40	21,19	A	64	0,64	A	32
Marker78458	2.706	Cma_Chr04	458875	A	G	G	17	1,16	A	15	15,0	R	7	4,3	G	10	0,10	A	2	2,0	A	4	4,0	G	8	0,8	R	6	2,4	A	4	4,0	R	15	9,6	G	4	0,4	G	7	0,7	N	.	.	G	12	0,12	N	.
Marker81897	5.208	Cma_Chr04	1333344	T	C	C	15	1,14	T	13	13,0	C	2	0,2	Y	14	10,4	T	14	14,0	T	12	12,0	C	10	0,10	Y	7	4,3	T	37	37,0	Y	25	7,18	Y	22	12,10	C	2	0,2	Y	15	12,3	Y	24	12,12	C	15
Marker78524	5.208	Cma_Chr04	471103	G	A	G	22	22,0	A	23	0,23	R	6	5,1	G	1	1,0	A	7	0,7	A	4	0,4	G	6	6,0	R	3	1,2	A	5	0,5	R	13	5,8	R	14	11,3	G	1	1,0	R	6	1,5	G	7	7,0	G	8
Marker79566	5.208	Cma_Chr04	812454	G	T	G	10	10,0	T	15	0,15	G	10	10,0	G	14	14,0	T	27	0,27	T	21	0,21	G	12	12,0	K	13	4,9	T	17	0,17	K	16	10,6	K	16	8,8	K	10	7,3	K	22	10,12	G	22	22,0	G	7
Marker80440	5.708	Cma_Chr04	1020707	C	T	C	12	12,0	T	16	0,16	C	11	11,0	C	4	4,0	T	6	0,6	T	13	0,13	C	13	13,0	Y	15	3,12	T	20	0,20	Y	23	13,10	Y	18	7,10	T	10	1,9	T	12	0,12	Y	13	6,7	C	6
Marker79567	5.708	Cma_Chr04	812479	T	C	T	12	12,0	C	11	0,11	T	10	10,0	T	14	14,0	C	26	0,26	C	21	0,21	T	12	12,0	Y	13	4,9	C	17	0,17	Y	16	10,6	Y	16	8,8	Y	10	7,3	Y	22	10,12	T	22	22,0	T	7
Marker81793	6.413	Cma_Chr04	1315227	G	A	A	13	1,12	G	15	13,2	A	13	0,13	R	10	7,3	G	10	10,0	G	6	6,0	A	14	0,14	R	14	2,12	G	37	37,0	R	26	8,18	R	27	17,10	R	12	5,7	G	6	6,0	R	8	2,6	A	19
Marker82504	7.618	Cma_Chr04	1800971	G	A	G	18	18,0	A	15	0,15	G	11	11,0	N	.	.	A	50	0,50	N	.	.	G	25	24,1	R	11	1,10	A	16	0,16	R	7	2,5	R	16	2,14	R	14	4,10	A	36	0,36	R	53	26,27	R	13
Marker81866	7.618	Cma_Chr04	1329272	T	C	C	11	0,11	T	17	17,0	C	10	0,10	Y	10	5,5	T	18	18,0	T	12	12,0	C	19	0,19	Y	20	11,9	Y	17	14,3	Y	14	2,12	Y	22	13,9	Y	18	6,12	T	11	11,0	Y	8	3,5	C	6
Marker81817	7.618	Cma_Chr04	1320634	G	T	T	18	0,18	G	23	23,0	T	14	0,14	K	10	1,9	G	14	14,0	G	12	12,0	T	14	1,13	K	2	1,1	G	18	18,0	K	8	6,2	K	8	3,5	K	11	6,5	G	8	8,0	K	12	8,4	T	10
Marker82168	7.618	Cma_Chr04	1466711	C	T	T	22	1,21	C	20	20,0	T	30	0,30	Y	19	13,6	C	32	32,0	C	34	34,0	T	39	0,39	Y	22	15,7	C	70	70,0	Y	46	18,28	Y	51	25,26	Y	16	11,5	C	34	34,0	Y	42	16,26	T	35
Marker82167	7.618	Cma_Chr04	1466672	C	A	A	23	2,21	C	18	18,0	A	30	0,30	M	19	13,6	C	32	32,0	C	34	34,0	A	39	0,39	M	22	15,7	C	70	70,0	M	46	18,28	M	51	24,27	M	15	10,5	C	34	34,0	M	42	16,26	A	35
Marker82346	8.618	Cma_Chr04	1744644	A	T	A	14	14,0	T	16	0,16	A	21	21,0	W	25	19,6	T	91	2,89	T	30	0,30	A	49	49,0	T	33	0,33	T	49	0,49	W	11	9,2	W	85	36,49	W	29	17,12	T	87	0,87	W	90	57,33	W	33
Marker82668	9.118	Cma_Chr04	1902148	T	C	C	17	0,17	T	15	15,0	C	2	0,2	C	4	0,4	T	18	18,0	Y	5	4,1	C	1	0,1	T	6	6,0	T	9	9,0	Y	10	6,4	Y	6	4,2	T	2	2,0	T	10	10,0	Y	6	2,4	C	7
Marker82949	10.119	Cma_Chr04	2043086	G	A	G	10	10,0	A	23	0,23	G	6	6,0	G	15	15,0	A	23	0,23	A	18	0,18	G	12	12,0	A	9	0,9	A	24	0,24	R	19	6,13	R	20	9,11	R	12	4,8	A	39	1,38	R	61	30,31	G	7
Marker83143	10.619	Cma_Chr04	2117090	T	C	T	11	11,0	C	22	0,22	T	46	46,0	T	27	27,0	C	91	0,91	C	43	0,43	T	45	45,0	C	34	0,34	C	67	0,67	Y	31	15,16	Y	95	43,52	Y	50	14,36	C	85	0,85	Y	52	35,17	T	41
Marker82347	10.619	Cma_Chr04	1744666	A	G	A	16	16,0	G	18	0,18	A	21	21,0	R	25	19,6	G	91	2,89	G	28	0,28	A	49	49,0	G	33	0,33	G	49	0,49	R	11	8,2	R	82	33,49	R	29	17,12	G	87	0,87	R	90	57,33	R	33
Marker83510	11.619	Cma_Chr04	2191339	G	A	G	15	14,1	A	21	0,21	G	34	34,0	R	13	12,1	A	30	0,30	A	22	0,22	G	28	28,0	A	11	0,11	A	35	0,35	R	10	8,2	R	27	16,11	R	22	16,6	A	32	0,32	R	38	18,20	G	18
Marker82948	11.619	Cma_Chr04	2043011	C	T	T	11	0,11	C	19	19,0	T	6	0,6	T	15	0,15	C	23	23,0	C	18	18,0	T	12	0,12	C	9	9,0	C	24	24,0	Y	19	13,6	Y	20	11,9	Y	12	8,4	C	37	37,0	Y	61	31,30	T	7
Marker82726	11.619	Cma_Chr04	1930303	T	C	C	19	1,18	T	15	15,0	C	21	1,20	C	31	1,30	T	86	85,1	T	51	51,0	C	68	2,66	T	64	64,0	T	53	53,0	Y	36	17,19	Y	51	24,27	Y	50	23,27	T	99	99,0	Y	85	44,41	C	68
Marker83321	12.119	Cma_Chr04	2159079	G	A	G	19	19,0	A	11	0,11	G	17	17,0	G	13	13,0	A	18	1,17	A	3	0,3	G	11	11,0	A	10	0,10	A	16	0,16	R	10	3,7	R	24	13,11	R	16	12,4	A	32	0,32	R	16	6,10	G	8
Marker82999	12.119	Cma_Chr04	2066241	G	A	G	22	22,0	A	20	0,20	G	22	22,0	G	17	17,0	A	19	0,19	A	16	0,16	G	21	21,0	A	20	0,20	A	22	0,22	R	23	12,11	R	34	20,14	R	18	10,8	A	25	0,25	R	22	18,4	G	10
Marker83012	12.619	Cma_Chr04	2089977	G	A	G	16	16,0	A	14	0,14	G	8	8,0	G	2	2,0	A	10	0,10	A	2	0,2	G	8	7,0	A	8	0,8	A	10	0,10	R	14	9,5	R	11	7,4	N	.	.	A	6	0,6	R	8	5,3	G	5
Marker82663	12.619	Cma_Chr04	1900371	T	C	T	14	14,0	C	19	0,19	T	18	18,0	T	4	4,0	Y	10	1,9	C	10	0,10	T	4	4,0	C	6	0,6	C	7	0,7	Y	28	15,13	Y	24	12,12	Y	5	3,2	C	13	0,13	Y	13	4,9	T	6
Marker82720	12.619	Cma_Chr04	1915791	C	T	T	16	1,15	C	12	12,0	T	30	0,30	T	26	0,26	C	79	79,0	C	25	25,0	T	35	1,34	Y	26	24,2	C	51	49,2	Y	19	13,6	Y	73	31,42	Y	31	14,17	C	73	72,1	Y	38	16,22	T	31
Marker83945	13.119	Cma_Chr04	2330453	G	A	A	18	1,17	G	20	20,0	A	21	0,21	A	5	0,5	G	31	31,0	G	13	13,0	A	19	0,19	G	16	16,0	G	26	26,0	R	26	6,20	R	28	17,11	R	5	4,1	G	42	42,0	R	35	19,16	A	32
Marker83583	13.119	Cma_Chr04	2208581	G	A	G	19	19,0	A	23	0,23	G	39	39,0	G	5	5,0	A	39	0,39	A	23	0,23	G	65	65,0	A	25	0,25	A	31	0,31	R	16	10,6	R	23	4,19	R	16	10,6	A	48	0,48	R	21	8,13	G	18
Marker83015	13.619	Cma_Chr04	2090112	C	T	C	21	21,0	T	11	0,11	C	8	8,0	C	2	2,0	T	10	0,10	T	2	0,2	C	8	8,0	T	8	0,8	T	10	0,10	Y	14	9,5	Y	11	7,4	N	.	.	T	6	0,6	Y	8	5,3	C	5
Marker83011	13.619	Cma_Chr04	2089904	A	T	A	20	20,0	T	11	0,11	A	8	8,0	A	2	2,0	T	10	0,10	T	2	0,2	A	8	8,0	T	8	0,8	T	10	0,10	W	14	9,5	W	11	7,4	N	.	.	T	6	0,6	W	8	5,3	A	5
Marker84183	14.119	Cma_Chr04	2414952	G	A	A	18	1,17	G	12	12,0	A	7	0,7	A	14	0,14	G	43	43,0	G	10	10,0	A	34	0,34	G	18	18,0	G	20	19,0	G	19	19,0	R	19	8,11	R	13	7,6	G	35	35,0	R	30	12,18	A	19
Marker84398	15.119	Cma_Chr04	2460072	G	T	G	13	13,0	T	21	0,21	G	24	24,0	G	6	6,0	T	30	0,30	T	33	1,32	G	17	17,0	T	23	0,23	T	21	0,21	T	34	1,33	K	23	10,13	K	15	4,11	T	19	0,19	K	52	29,23	G	17
Marker84539	16.619	Cma_Chr04	2492444	T	C	C	14	0,14	T	10	10,0	C	29	0,29	C	12	0,12	T	15	15,0	T	7	7,0	C	32	0,32	T	15	15,0	T	21	21,0	T	44	44,0	Y	25	12,13	Y	17	8,9	T	24	24,0	Y	37	23,14	C	9
Marker84645	18.12	Cma_Chr04	2521327	C	T	C	17	16,1	T	14	0,14	C	22	22,0	C	19	18,1	T	18	0,18	T	17	0,17	C	20	20,0	T	19	0,19	T	16	0,16	T	46	0,46	Y	13	8,5	Y	6	2,4	T	14	0,14	Y	12	5,7	C	4
Marker84535	19.12	Cma_Chr04	2491527	T	C	C	25	0,25	T	16	16,0	C	36	0,36	C	24	1,23	T	97	97,0	T	36	35,1	C	124	1,123	T	71	71,0	T	91	88,3	T	32	31,1	Y	83	37,46	Y	40	24,16	T	103	103,0	Y	98	49,49	C	59
Marker84291	19.12	Cma_Chr04	2438485	G	T	T	14	0,14	G	14	14,0	T	17	1,16	T	12	0,12	G	34	34,0	G	12	12,0	T	24	0,24	G	19	19,0	G	57	57,0	G	23	23,0	K	25	14,11	K	14	10,4	G	31	31,0	K	26	12,14	T	20
Marker84293	19.12	Cma_Chr04	2438756	T	C	C	16	0,16	T	20	20,0	C	17	1,16	C	12	0,12	T	34	34,0	T	12	12,0	C	24	0,24	T	19	19,0	T	57	57,0	T	23	23,0	Y	25	14,11	Y	14	10,4	T	31	31,0	Y	27	12,15	C	20
Marker84591	19.12	Cma_Chr04	2505956	C	A	C	15	15,0	A	20	0,20	C	34	34,0	C	11	11,0	A	23	0,23	M	14	1,13	C	29	29,0	A	23	0,23	A	31	0,31	A	25	0,25	M	14	3,11	M	8	3,5	A	26	0,26	M	18	15,3	C	12
Marker84566	19.12	Cma_Chr04	2498780	G	T	G	24	23,1	T	15	0,15	G	9	9,0	G	9	9,0	T	10	0,10	T	3	0,3	G	14	14,0	T	14	0,14	T	16	1,15	T	20	0,20	K	25	16,9	K	2	1,1	T	7	0,7	K	5	3,2	G	12
Marker84583	19.12	Cma_Chr04	2502735	G	A	A	20	1,19	G	12	12,0	A	25	0,25	R	13	4,9	G	32	32,0	G	15	15,0	A	11	0,11	G	17	17,0	G	22	22,0	G	51	51,0	R	25	14,11	R	23	17,6	G	31	31,0	R	18	7,11	R	2
Marker84582	19.12	Cma_Chr04	2502508	C	A	A	10	0,10	C	10	10,0	A	25	0,25	M	13	4,9	C	32	32,0	C	15	15,0	A	11	0,11	C	17	17,0	C	22	22,0	C	52	52,0	M	24	13,11	M	23	17,6	C	31	31,0	M	18	7,11	M	2
Marker84950	19.62	Cma_Chr04	2583427	A	G	G	14	0,14	A	25	25,0	G	10	0,10	G	9	0,9	R	19	8,11	A	5	5,0	G	12	0,12	A	8	8,0	A	26	26,0	R	21	11,10	A	15	13,2	R	10	2,8	A	11	11,0	R	12	10,2	G	5
Marker85059	20.12	Cma_Chr04	2611247	T	C	T	13	13,0	C	15	0,15	T	14	14,0	T	14	14,0	Y	49	18,31	C	16	0,16	T	21	21,0	C	9	0,9	C	47	0,47	Y	29	15,14	Y	27	14,13	Y	13	5,8	C	47	0,47	Y	36	16,20	T	9
Marker85283	20.62	Cma_Chr04	2699751	G	C	C	17	0,17	G	12	12,0	S	26	5,21	C	25	0,25	S	39	25,14	G	30	30,0	C	14	0,14	G	43	43,0	G	77	75,2	S	56	36,20	S	89	53,36	S	23	17,6	G	84	81,3	S	57	34,23	C	13
Marker85041	20.62	Cma_Chr04	2609264	T	C	C	15	0,15	T	18	18,0	C	10	0,10	C	3	0,3	Y	4	1,3	T	4	4,0	C	10	0,10	T	9	9,0	T	1	1,0	Y	11	2,9	Y	16	6,10	Y	5	2,3	T	9	9,0	N	.	.	C	2
Marker85390	21.12	Cma_Chr04	2757214	A	G	G	15	0,15	A	18	18,0	G	20	0,20	G	4	0,4	R	4	2,2	A	17	17,0	G	6	0,6	A	9	9,0	A	6	6,0	R	15	5,10	R	13	4,9	A	4	4,0	A	5	5,0	R	6	1,5	G	6
Marker85042	21.12	Cma_Chr04	2609424	G	A	A	11	0,11	G	15	15,0	A	10	0,10	A	3	0,3	R	4	1,3	G	4	4,0	A	10	0,10	G	9	9,0	G	1	1,0	R	11	2,9	R	15	6,9	R	5	2,3	G	9	9,0	N	.	.	A	2
Marker85537	21.62	Cma_Chr04	2802069	C	T	C	19	18,1	T	22	0,22	C	18	18,0	C	14	14,0	Y	35	19,16	T	14	0,14	C	50	50,0	T	34	0,34	T	38	1,37	Y	42	28,14	Y	42	22,20	Y	23	15,8	T	72	1,71	Y	50	17,33	C	14
Marker85222	21.62	Cma_Chr04	2643408	G	A	A	17	0,17	G	10	10,0	A	8	0,8	A	22	0,22	R	53	30,23	G	16	16,0	A	46	0,46	G	14	14,0	G	26	26,0	R	27	15,12	R	18	12,6	R	10	3,7	G	36	36,0	R	19	5,14	A	18
Marker85221	21.62	Cma_Chr04	2643380	T	C	T	20	20,0	C	12	0,12	T	8	8,0	T	22	22,0	Y	53	23,30	C	16	0,16	T	46	46,0	C	14	0,14	C	26	0,26	Y	27	12,15	Y	18	6,11	Y	10	7,3	C	36	0,36	Y	19	14,5	T	18
Marker85219	21.62	Cma_Chr04	2643206	T	A	A	19	1,18	T	18	18,0	A	8	0,8	A	22	0,22	W	52	30,22	T	16	16,0	A	46	0,46	T	14	14,0	T	27	27,0	W	27	15,12	W	18	12,6	W	10	3,7	T	37	37,0	W	19	5,14	A	18
Marker85061	21.62	Cma_Chr04	2611614	C	T	C	12	12,0	T	20	0,20	Y	8	7,1	C	23	23,0	Y	37	19,18	T	22	0,22	C	21	21,0	T	18	0,18	T	35	0,35	Y	54	29,25	Y	38	21,17	Y	14	7,7	T	24	0,24	Y	32	19,13	C	40
Marker84806	21.62	Cma_Chr04	2555457	C	T	T	26	0,26	C	25	25,0	T	21	0,21	T	10	0,10	Y	18	14,4	C	23	23,0	T	25	0,25	C	13	13,0	C	29	28,1	Y	36	18,18	Y	20	11,9	Y	19	4,14	C	16	16,0	Y	26	13,13	T	16
Marker85672	22.12	Cma_Chr04	2865663	G	A	A	19	0,19	G	21	21,0	A	5	0,5	A	18	1,16	R	38	18,20	R	11	10,1	A	17	0,17	G	21	21,0	G	30	30,0	R	16	9,7	R	44	23,21	R	16	10,6	G	36	36,0	R	26	12,14	R	16
Marker85331	22.12	Cma_Chr04	2731525	G	A	G	16	16,0	A	20	0,20	G	1	1,0	G	2	2,0	R	5	3,2	A	5	0,5	G	2	2,0	A	7	0,7	A	8	0,8	R	11	3,8	R	40	22,18	R	3	2,1	A	7	0,7	R	15	6,9	G	3
Marker85330	22.12	Cma_Chr04	2731504	G	A	G	16	16,0	A	21	0,21	G	1	1,0	G	2	2,0	R	5	3,2	A	5	0,5	G	2	2,0	A	7	0,7	A	8	0,8	R	11	3,8	R	40	22,18	R	3	2,1	A	7	0,7	R	15	6,9	G	3
Marker85329	22.12	Cma_Chr04	2731458	A	G	A	14	14,0	G	24	0,24	A	1	1,0	A	2	2,0	R	5	3,2	G	5	0,5	A	2	2,0	G	7	0,7	G	8	0,8	R	11	3,8	R	40	22,18	R	3	2,1	G	7	0,7	R	15	6,9	A	3
Marker85284	22.12	Cma_Chr04	2699824	C	T	T	19	0,19	C	15	15,0	T	9	0,9	T	7	0,7	Y	16	12,4	Y	8	7,1	T	18	0,18	C	15	15,0	C	29	29,0	Y	52	18,34	Y	32	20,12	T	2	0,2	C	8	8,0	Y	13	5,8	T	15
Marker85756	22.62	Cma_Chr04	2889412	G	A	G	17	16,1	A	24	0,24	G	29	29,0	G	21	21,0	R	76	39,37	R	36	4,32	G	49	48,1	A	44	0,44	A	50	0,50	R	29	11,18	R	66	39,27	R	16	8,8	A	73	0,73	R	68	30,38	G	26
Marker85391	22.62	Cma_Chr04	2757243	G	A	A	12	0,12	G	17	17,0	A	20	0,20	A	4	0,4	R	4	2,2	G	17	17,0	A	6	0,6	G	9	9,0	G	6	6,0	R	15	5,10	R	13	4,9	G	4	4,0	G	5	5,0	R	6	1,5	A	6
Marker85817	23.12	Cma_Chr04	2953875	A	G	G	29	1,28	A	18	18,0	G	17	0,17	G	11	0,11	R	32	17,15	A	24	23,1	G	28	0,28	A	15	15,0	A	16	16,0	R	13	10,3	R	23	8,15	R	8	6,2	A	21	21,0	R	23	3,20	G	21
Marker85763	23.62	Cma_Chr04	2890999	C	A	C	17	17,0	A	14	0,14	C	12	12,0	C	14	14,0	M	28	17,11	A	13	0,13	M	9	8,1	A	18	1,17	A	16	0,16	M	34	16,18	M	35	21,14	M	12	7,4	A	20	0,20	M	28	10,18	C	14
Marker85755	23.62	Cma_Chr04	2889405	T	A	T	17	16,1	A	24	0,24	T	29	29,0	T	21	21,0	W	76	39,37	W	36	4,32	T	49	48,1	A	44	0,44	A	50	0,50	W	29	11,18	W	66	39,27	W	16	8,8	A	73	0,73	W	67	30,37	T	26
Marker86235	24.125	Cma_Chr04	3143635	C	A	C	17	17,0	A	26	0,26	C	2	2,0	C	8	8,0	M	14	12,2	A	2	0,2	C	7	7,0	A	18	0,18	A	4	0,4	M	2	1,1	M	4	2,2	N	.	.	A	3	0,3	M	10	6,4	C	10
Marker85762	24.125	Cma_Chr04	2890973	G	A	G	15	15,0	A	14	0,14	G	12	12,0	G	14	14,0	R	28	17,11	A	13	0,13	R	9	8,1	A	18	1,17	A	16	0,16	R	34	16,18	R	35	21,14	R	12	7,5	A	20	0,20	R	28	10,18	G	14
Marker85616	24.125	Cma_Chr04	2850808	A	T	T	21	0,21	A	38	38,0	T	7	0,7	T	13	0,13	W	9	5,4	A	11	11,0	T	12	0,12	A	10	10,0	A	14	14,0	W	24	10,14	W	16	8,8	W	11	8,3	A	12	12,0	W	11	4,7	T	7
Marker85757	24.125	Cma_Chr04	2889424	C	A	C	16	15,1	A	22	0,22	C	29	29,0	C	21	21,0	M	76	39,37	M	36	4,32	C	49	48,1	A	44	0,44	A	50	0,50	M	29	11,18	M	66	39,27	M	16	8,8	A	73	0,73	M	68	30,38	C	26
Marker86181	24.125	Cma_Chr04	3123161	A	C	A	14	13,1	C	18	0,18	A	19	19,0	A	27	27,0	M	24	7,17	M	14	2,12	A	15	15,0	C	16	0,16	C	28	0,28	M	26	9,17	M	33	18,15	M	9	4,5	C	15	0,15	M	17	3,14	A	11
Marker86319	24.625	Cma_Chr04	3197602	T	C	C	21	1,20	T	12	12,0	C	16	0,16	C	5	0,5	Y	19	11,8	T	39	39,0	C	12	0,12	T	29	29,0	T	42	42,0	Y	19	12,7	Y	49	24,25	Y	18	13,4	T	23	23,0	Y	25	9,16	C	8
Marker85916	24.625	Cma_Chr04	2972270	A	T	A	25	24,1	T	16	0,16	A	31	30,1	A	21	21,0	W	75	39,36	T	31	1,29	A	55	55,0	T	30	1,29	T	49	1,48	W	32	20,12	W	46	30,16	W	50	31,19	T	93	0,93	W	85	39,46	A	36
Marker86422	25.125	Cma_Chr04	3220905	C	T	T	19	1,18	C	21	21,0	T	20	0,20	T	22	0,22	Y	32	16,16	C	18	18,0	T	34	0,34	C	23	23,0	C	41	41,0	Y	21	7,14	Y	32	27,5	Y	18	8,10	C	22	22,0	Y	29	13,16	T	23
Marker86183	25.125	Cma_Chr04	3123422	G	A	G	24	24,0	A	22	0,22	G	19	19,0	G	27	27,0	R	24	7,17	R	14	2,12	G	15	15,0	A	16	0,15	A	28	0,28	R	26	9,17	R	33	18,15	R	9	4,5	A	15	0,15	R	17	3,14	G	11
Marker86182	25.125	Cma_Chr04	3123373	G	A	G	24	23,1	A	24	0,24	G	19	19,0	G	27	27,0	R	24	7,17	R	14	2,12	G	15	15,0	A	16	0,16	A	28	0,28	R	26	9,17	R	33	18,15	R	9	4,5	A	15	0,15	R	17	3,14	G	11
Marker85786	25.125	Cma_Chr04	2946129	A	G	A	24	23,1	G	20	0,20	A	28	27,1	A	13	13,0	R	20	9,11	G	15	0,15	A	14	14,0	G	21	0,21	G	14	1,13	R	32	19,13	R	19	9,10	R	7	2,5	G	13	0,13	R	17	6,11	R	14
Marker86375	25.625	Cma_Chr04	3209519	G	A	G	17	17,0	A	15	0,15	G	12	12,0	G	6	6,0	R	17	7,10	A	15	0,15	G	16	16,0	A	17	0,17	A	26	0,26	R	25	12,13	R	19	15,4	R	18	12,6	A	14	0,14	R	44	27,17	G	17
Marker86259	25.625	Cma_Chr04	3177215	A	C	C	17	0,17	A	19	19,0	C	10	0,10	C	20	0,20	M	28	20,8	A	28	28,0	C	30	0,30	A	25	25,0	A	41	41,0	M	29	16,13	M	35	21,14	M	34	12,22	A	30	30,0	M	12	7,5	C	27
Marker86258	25.625	Cma_Chr04	3177203	C	G	G	17	0,17	C	17	17,0	G	10	0,10	G	20	0,20	S	28	20,8	C	28	28,0	G	30	0,30	C	25	25,0	C	41	41,0	S	29	16,13	S	35	21,14	S	34	12,22	C	30	30,0	S	12	7,5	G	27
Marker86257	25.625	Cma_Chr04	3176993	T	G	G	20	0,20	T	22	22,0	G	10	0,10	G	20	0,20	K	28	20,8	T	28	28,0	G	30	0,30	T	25	25,0	T	40	39,1	K	29	16,13	K	36	21,15	K	34	12,22	T	29	29,0	K	12	7,5	G	27
Marker86417	26.125	Cma_Chr04	3219959	G	A	G	15	15,0	A	13	0,13	G	13	13,0	G	10	10,0	R	24	11,13	A	7	0,7	G	7	7,0	A	9	0,9	A	16	0,16	R	49	33,16	R	15	7,8	R	5	3,2	A	13	0,13	R	12	7,5	G	17
Marker86400	26.125	Cma_Chr04	3215804	G	A	A	13	0,13	G	19	19,0	A	6	0,6	A	4	0,4	R	7	3,4	G	10	10,0	A	21	0,21	G	8	8,0	G	8	8,0	R	17	8,9	R	9	4,5	A	7	0,7	G	1	1,0	N	.	.	A	5
Marker86347	26.125	Cma_Chr04	3203004	T	C	C	17	1,16	T	12	12,0	C	40	0,40	C	19	0,19	Y	64	30,34	T	37	37,0	C	57	0,57	T	43	42,1	T	35	35,0	Y	36	29,7	Y	65	35,30	Y	47	17,30	T	57	57,0	Y	66	40,26	C	28
Marker86346	26.125	Cma_Chr04	3202963	A	G	G	11	0,11	A	17	17,0	G	40	0,40	G	19	0,19	R	64	30,34	A	37	37,0	G	57	0,57	A	43	42,1	A	35	35,0	R	36	29,7	R	65	35,30	R	47	17,30	A	57	57,0	R	66	41,25	G	28
Marker86331	26.125	Cma_Chr04	3200283	G	A	A	16	1,15	G	16	16,0	A	10	0,10	A	15	0,15	R	35	20,15	R	30	27,3	A	27	0,27	G	17	17,0	R	9	7,2	R	31	14,17	R	18	10,8	R	20	3,17	G	17	17,0	R	16	10,6	A	9
Marker86320	26.125	Cma_Chr04	3197766	C	T	T	16	1,15	C	16	16,0	T	16	0,16	T	5	0,5	Y	19	11,8	C	39	39,0	T	12	0,12	C	29	29,0	C	42	42,0	Y	19	12,7	Y	49	24,25	Y	18	14,4	C	23	23,0	Y	25	9,16	T	8
Marker86464	26.625	Cma_Chr04	3240710	A	T	A	17	16,1	T	13	0,13	A	14	14,0	W	20	11,9	W	26	20,6	T	17	0,17	A	28	28,0	T	15	0,15	T	20	0,20	W	22	14,8	W	17	6,11	W	5	1,4	T	23	1,22	W	26	9,17	A	14
Marker86647	27.125	Cma_Chr04	3329590	G	C	C	20	1,19	G	14	14,0	C	9	0,9	S	10	4,6	S	11	7,4	G	18	18,0	C	3	0,3	G	16	16,0	G	21	21,0	S	25	18,7	S	20	10,10	S	10	4,6	G	10	10,0	S	10	7,3	C	5
Marker86416	27.125	Cma_Chr04	3219847	A	C	A	17	16,1	C	20	0,20	A	13	13,0	A	10	10,0	M	24	11,13	C	7	0,7	A	7	7,0	C	10	0,10	C	16	0,16	M	49	33,16	M	15	7,8	M	5	3,2	C	13	0,13	M	12	7,5	A	17
Marker86300	27.125	Cma_Chr04	3191100	T	G	G	16	0,16	T	11	11,0	G	7	0,7	G	1	0,1	K	34	9,25	T	6	6,0	G	16	0,16	T	23	23,0	T	13	13,0	K	22	10,12	K	46	15,31	K	4	3,1	T	26	25,1	K	35	20,15	G	10
Marker86377	27.125	Cma_Chr04	3209726	C	T	C	20	20,0	T	18	0,18	C	12	12,0	C	6	6,0	Y	17	7,10	T	15	0,15	C	16	16,0	T	17	0,17	T	26	0,26	Y	24	12,12	Y	19	15,4	Y	18	12,6	T	14	0,14	Y	44	27,17	C	17
Marker86754	27.625	Cma_Chr04	3401067	G	A	G	13	13,0	A	23	0,23	G	17	17,0	R	14	8,6	R	16	6,10	A	11	0,11	G	13	13,0	A	6	0,6	A	29	1,28	R	18	7,11	R	29	15,14	R	5	3,2	A	23	0,23	R	17	7,10	R	10
Marker86424	27.625	Cma_Chr04	3221184	C	T	C	11	10,1	T	23	0,23	C	24	24,0	C	9	9,0	Y	63	32,31	Y	18	2,16	C	61	59,0	T	29	0,29	T	31	0,31	Y	58	44,14	Y	41	24,17	Y	18	7,11	T	57	1,55	Y	69	42,27	C	40
Marker86728	28.625	Cma_Chr04	3383695	G	A	G	14	13,1	A	22	0,22	G	50	50,0	R	35	11,24	R	77	37,40	A	38	0,38	G	44	44,0	A	27	1,26	A	44	0,44	R	24	14,10	R	51	27,24	R	40	26,14	A	95	2,93	R	54	26,28	G	22
Marker86763	29.626	Cma_Chr04	3402729	C	G	G	29	1,28	C	22	22,0	G	10	0,10	S	3	1,2	S	6	4,2	C	5	5,0	G	8	0,8	C	10	10,0	C	15	15,0	S	29	20,9	S	12	9,3	S	5	1,4	C	4	4,0	S	6	2,4	G	1
Marker87349	30.626	Cma_Chr04	3618440	G	A	A	13	0,13	G	24	24,0	A	24	0,24	R	28	17,11	R	51	29,22	G	37	37,0	A	34	0,34	G	45	45,0	G	40	40,0	R	15	10,5	R	58	24,34	R	27	17,10	G	68	68,0	R	87	37,50	A	23
Marker86715	30.626	Cma_Chr04	3380252	A	C	A	15	14,1	C	18	0,18	A	12	12,0	M	23	11,12	M	31	14,17	C	21	0,21	A	32	32,0	C	13	0,13	C	36	0,36	M	45	20,25	M	34	17,17	M	13	9,4	C	21	0,21	M	27	5,22	A	11
Marker87350	31.126	Cma_Chr04	3618460	A	G	G	17	1,16	A	24	24,0	G	24	0,24	R	28	17,11	R	51	29,22	A	37	37,0	G	34	0,34	A	45	45,0	A	40	40,0	R	15	10,5	R	58	24,34	R	27	17,10	A	68	68,0	R	87	37,50	G	23
Marker87217	31.126	Cma_Chr04	3547435	T	A	T	12	12,0	A	21	0,21	T	16	16,0	W	8	7,1	W	23	9,14	A	20	0,20	T	18	18,0	A	15	0,15	A	52	0,52	W	9	5,4	W	23	16,7	W	4	2,2	A	31	0,31	W	34	19,15	T	23
Marker86965	31.126	Cma_Chr04	3478316	A	G	G	16	1,15	A	22	22,0	G	48	0,48	R	23	13,10	R	138	61,77	A	44	44,0	G	109	0,109	A	59	58,1	A	63	61,2	R	31	15,16	R	91	51,40	R	34	9,25	A	170	166,4	R	126	78,48	G	48
Marker87518	31.831	Cma_Chr04	4799526	A	T	T	15	0,15	A	20	20,0	A	8	8,0	N	.	.	W	5	2,3	W	5	1,4	A	3	3,0	A	11	11,0	A	35	35,0	W	4	1,3	W	7	4,3	W	7	1,6	T	9	0,9	T	16	0,16	T	31
Marker87487	32.331	Cma_Chr04	4788346	T	A	T	15	14,1	A	13	0,13	W	9	6,3	W	15	8,7	W	12	9,3	W	4	3,1	A	14	0,14	A	1	0,1	A	10	0,10	W	13	6,7	W	6	3,3	N	.	.	T	14	14,0	T	5	5,0	T	3
Marker87389	32.331	Cma_Chr04	3689947	A	C	C	11	0,11	A	12	12,0	C	2	0,2	M	2	1,1	A	2	2,0	M	5	4,1	C	7	0,7	A	10	10,0	A	2	2,0	M	65	23,42	M	12	7,5	A	1	1,0	A	9	9,0	M	11	8,3	M	4
Marker87488	33.331	Cma_Chr04	4788388	C	T	C	17	16,1	T	11	0,11	Y	9	6,3	Y	15	8,7	Y	12	9,3	Y	4	3,1	T	14	0,14	T	1	0,1	T	10	0,10	Y	13	6,7	Y	6	3,3	N	.	.	C	14	14,0	C	5	5,0	C	3
Marker87554	39.445	Cma_Chr04	4806125	A	G	G	13	0,13	A	25	24,1	R	48	27,21	R	24	16,8	R	79	42,37	R	31	19,12	A	73	70,2	A	79	79,0	A	94	94,0	R	48	26,22	R	77	41,36	R	45	25,19	G	110	0,110	G	96	1,94	G	59
Marker87671	40.65	Cma_Chr04	4839771	G	A	A	16	1,15	G	22	22,0	N	.	.	G	3	3,0	R	13	8,5	A	1	0,1	G	6	6,0	G	6	6,0	G	25	25,0	R	20	11,9	R	17	11,6	R	4	2,2	A	7	0,7	A	11	0,11	A	7
Marker88018	42.15	Cma_Chr04	5006046	T	C	T	15	15,0	C	10	0,10	Y	11	6,5	Y	6	2,4	Y	9	2,7	T	4	4,0	C	12	0,12	Y	6	4,2	C	26	0,26	Y	26	14,12	Y	17	11,6	Y	11	9,2	T	12	12,0	T	25	25,0	Y	16
Marker87914	42.15	Cma_Chr04	4924571	A	G	G	17	1,16	A	17	17,0	R	11	5,6	R	8	1,7	R	15	4,11	R	10	9,1	A	11	11,0	R	14	12,2	A	15	15,0	R	22	11,11	R	21	10,11	R	22	5,17	R	12	5,7	G	14	0,14	R	9
Marker87752	42.15	Cma_Chr04	4867108	A	G	G	20	1,19	A	15	15,0	R	13	5,8	R	7	4,3	R	34	13,21	R	9	3,6	A	36	36,0	A	21	21,0	A	28	28,0	R	22	13,9	R	28	15,12	R	24	8,16	G	34	1,33	G	82	0,82	R	38
Marker87498	42.65	Cma_Chr04	4790259	C	T	C	14	14,0	T	18	0,18	Y	2	1,1	Y	10	8,2	Y	11	7,4	Y	3	2,1	Y	7	1,6	T	1	0,1	T	12	0,12	Y	22	8,14	Y	10	6,4	T	7	0,7	C	8	8,0	C	9	9,0	C	3
Marker87745	42.65	Cma_Chr04	4862337	G	A	A	10	0,10	G	16	15,1	R	18	13,5	R	28	12,16	R	34	16,18	R	10	3,7	G	53	53,0	G	33	31,2	G	26	26,0	R	43	22,21	R	21	16,5	R	38	20,17	A	37	0,37	A	44	0,44	R	25
Marker87902	42.65	Cma_Chr04	4921450	T	C	C	10	0,10	T	21	21,0	Y	17	8,9	Y	26	17,9	Y	44	17,27	Y	14	5,9	T	54	54,0	T	11	11,0	T	38	38,0	Y	50	18,32	Y	43	27,16	Y	19	6,13	C	21	0,21	C	15	1,14	Y	14
Marker87723	43.15	Cma_Chr04	4856237	C	A	A	20	0,20	C	16	16,0	M	19	10,9	M	15	6,9	M	37	20,17	M	16	7,9	C	31	31,0	C	20	20,0	C	43	43,0	M	36	22,14	M	44	20,24	M	32	14,18	A	26	1,25	A	37	0,37	M	35
Marker88095	43.65	Cma_Chr04	5045742	G	A	G	15	14,1	A	10	0,10	R	4	2,2	R	6	2,4	R	3	1,2	R	3	1,2	A	12	0,12	R	6	1,5	A	9	0,9	R	32	14,17	R	8	7,1	R	4	1,3	N	.	.	G	3	3,0	R	2
Marker88019	43.65	Cma_Chr04	5006103	C	G	C	17	17,0	G	11	0,11	S	11	6,5	S	6	2,4	S	9	2,7	C	4	4,0	G	12	0,12	S	6	4,2	G	26	0,26	S	26	14,12	S	17	11,6	S	11	9,2	C	12	12,0	C	23	23,0	S	16
Marker87795	43.65	Cma_Chr04	4889556	T	A	A	10	0,10	T	15	15,0	W	24	15,9	W	27	14,13	W	104	56,48	W	38	16,22	T	62	61,0	T	59	59,0	T	113	113,0	W	27	18,9	W	104	41,63	W	42	20,22	A	100	0,99	A	84	0,84	W	48
Marker88041	44.15	Cma_Chr04	5026431	A	G	A	31	29,2	G	14	0,14	R	7	5,2	R	11	7,4	R	10	7,3	R	6	3,3	G	18	0,18	R	7	4,3	G	17	0,17	R	13	5,8	R	14	8,6	R	13	4,9	A	14	14,0	A	20	20,0	G	10
Marker88139	44.655	Cma_Chr04	5051459	A	G	A	16	15,1	G	13	0,13	R	18	7,11	A	2	2,0	R	21	10,11	R	13	8,5	G	11	0,11	R	14	6,8	G	17	0,17	R	15	6,9	R	21	13,8	R	9	2,7	A	7	7,0	A	7	7,0	R	13
Marker88161	45.656	Cma_Chr04	5189822	G	A	A	17	1,16	G	16	16,0	R	12	8,4	R	10	8,2	R	35	17,18	R	15	10,5	G	35	34,1	A	34	0,34	G	47	45,2	R	44	26,18	R	53	18,35	R	11	9,2	A	22	0,22	A	10	0,10	R	15
Marker88138	45.656	Cma_Chr04	5051449	G	C	G	15	14,1	C	15	0,15	S	18	7,11	G	2	2,0	S	21	10,11	S	13	8,5	C	11	0,11	S	14	6,8	C	17	0,17	S	15	6,9	S	21	13,8	S	9	2,7	G	7	7,0	G	7	7,0	S	13
Marker88137	45.656	Cma_Chr04	5051212	C	T	C	20	19,1	T	16	0,16	Y	18	7,11	C	2	2,0	Y	21	10,11	Y	13	8,5	T	11	0,11	Y	14	6,8	T	17	0,17	Y	16	7,9	Y	21	13,8	Y	9	2,7	C	7	7,0	C	7	7,0	Y	13
Marker88042	45.656	Cma_Chr04	5026639	G	T	G	12	12,0	T	17	0,17	K	7	5,2	K	11	7,4	K	10	7,3	K	6	3,3	T	18	0,18	K	7	4,3	T	16	0,16	K	13	5,8	K	14	8,6	K	13	4,9	G	14	14,0	G	20	20,0	T	10
Marker88359	46.156	Cma_Chr04	5277895	A	G	A	16	16,0	G	14	0,14	R	19	4,15	R	31	10,21	R	61	21,40	R	14	7,7	G	64	0,64	A	23	23,0	G	53	0,53	R	21	7,14	R	56	15,41	R	38	23,15	A	38	37,1	A	38	37,1	R	32
Marker88160	46.156	Cma_Chr04	5189811	G	A	A	17	1,16	G	15	15,0	R	12	8,4	R	10	8,2	R	35	17,18	R	15	10,5	G	35	34,1	A	34	0,34	G	47	45,2	R	44	26,18	R	53	18,35	R	11	9,2	A	22	0,22	A	10	0,10	R	15
Marker88452	47.156	Cma_Chr04	5325977	A	T	T	11	0,11	A	20	20,0	W	14	6,8	W	10	4,6	W	13	9,4	W	28	12,16	A	24	24,0	T	27	2,25	A	20	20,0	W	75	39,36	W	43	16,27	W	9	2,7	W	28	3,25	T	19	1,18	W	25
Marker88211	47.156	Cma_Chr04	5201569	C	A	A	17	0,17	C	26	26,0	M	16	8,8	M	24	13,11	M	26	10,16	M	8	4,4	C	8	8,0	A	14	0,14	M	13	12,1	M	20	11,9	M	13	7,6	M	14	3,11	A	27	1,26	A	21	0,21	M	7
Marker88453	47.656	Cma_Chr04	5326035	T	C	C	18	0,18	T	16	16,0	Y	14	5,8	Y	11	4,7	Y	13	9,4	Y	29	11,18	T	24	23,0	C	27	1,26	T	20	20,0	Y	75	39,36	Y	43	16,27	Y	9	2,7	Y	28	3,25	C	19	0,19	Y	27
Marker89162	48.156	Cma_Chr04	5458934	A	C	C	21	2,19	A	21	21,0	M	14	11,3	M	17	11,6	M	91	30,61	M	24	9,15	A	48	48,0	C	52	0,52	A	57	57,0	M	19	11,8	M	58	31,27	M	51	25,26	C	85	0,85	C	101	0,101	M	72
Marker89190	48.656	Cma_Chr04	5463903	G	A	A	15	0,15	G	18	18,0	R	9	2,7	R	14	4,10	R	11	4,7	R	7	4,3	G	8	8,0	A	8	0,8	G	23	23,0	R	20	12,8	R	24	10,14	R	9	4,5	A	7	0,7	A	13	0,13	R	14
Marker88581	48.656	Cma_Chr04	5355714	G	A	A	13	0,13	G	22	22,0	R	13	11,2	R	4	3,1	R	36	21,15	R	18	14,4	G	21	20,1	A	15	0,15	G	53	51,2	R	30	9,21	R	28	15,13	R	8	3,5	A	31	0,31	A	17	0,17	R	11
Marker88852	48.656	Cma_Chr04	5411319	G	A	A	19	0,19	G	19	19,0	R	10	6,4	R	7	5,2	R	24	10,14	R	12	7,5	G	33	33,0	A	18	0,18	G	14	14,0	R	16	13,3	R	20	17,3	R	10	8,2	A	32	0,32	A	27	0,27	R	19
Marker88454	48.656	Cma_Chr04	5326057	T	A	A	16	1,15	T	15	15,0	W	14	6,8	W	11	4,7	W	13	9,4	W	29	11,18	T	24	24,0	A	27	1,26	T	20	20,0	W	75	39,36	W	43	16,27	W	9	2,7	W	28	3,25	A	19	0,19	W	27
Marker88518	49.156	Cma_Chr04	5348584	C	A	C	12	12,0	A	18	0,18	M	13	8,5	M	15	5,10	M	22	12,10	M	5	1,4	A	7	0,7	C	12	12,0	A	17	0,17	M	34	19,15	M	21	3,18	A	3	0,3	C	5	5,0	C	17	17,0	A	2
Marker88710	49.156	Cma_Chr04	5380798	T	G	G	25	1,24	T	19	19,0	K	21	9,12	K	11	5,6	K	37	26,11	K	11	8,3	T	19	19,0	G	13	0,13	T	46	46,0	K	29	15,14	K	35	21,13	K	22	14,8	G	8	0,8	G	21	0,21	K	5
Marker89477	50.156	Cma_Chr04	5568687	T	C	C	22	1,21	T	23	23,0	Y	8	3,5	Y	7	4,3	Y	11	6,5	C	16	0,16	T	14	14,0	C	14	0,14	T	27	27,0	Y	22	14,8	Y	9	3,6	Y	9	2,7	Y	16	1,15	C	24	0,24	Y	4
Marker88923	50.156	Cma_Chr04	5423906	C	T	C	16	16,0	T	17	0,17	Y	22	16,5	Y	14	6,8	Y	48	24,24	Y	22	7,15	T	50	1,49	C	40	40,0	T	27	1,26	Y	37	28,9	Y	58	26,32	Y	25	14,11	C	34	33,1	C	34	34,0	Y	30
Marker88440	50.661	Cma_Chr04	5322680	G	A	A	12	0,12	G	17	17,0	R	9	3,6	R	7	6,1	R	14	12,2	R	5	1,4	G	6	6,0	A	8	0,8	G	18	18,0	R	20	9,11	G	2	2,0	G	8	8,0	A	2	0,2	A	6	0,6	R	4
Marker88636	50.661	Cma_Chr04	5365993	G	A	G	19	18,1	A	21	0,21	R	7	2,5	R	19	7,12	R	33	18,15	R	6	5,1	A	25	1,24	G	20	20,0	A	26	0,26	R	24	14,10	R	26	10,16	R	18	9,8	G	30	30,0	G	29	29,0	A	2
Marker88743	50.661	Cma_Chr04	5390067	A	G	A	16	16,0	G	13	0,13	R	15	8,7	R	4	3,1	R	16	7,9	R	5	3,2	G	25	0,25	A	9	9,0	G	4	0,4	R	44	20,24	R	26	10,16	R	9	6,3	A	2	2,0	A	20	20,0	R	3
Marker89609	51.661	Cma_Chr04	5593343	C	T	T	18	1,17	C	16	16,0	C	5	5,0	Y	12	8,4	Y	36	10,26	T	8	0,8	C	14	13,1	T	19	0,19	C	27	27,0	Y	11	10,1	Y	23	12,11	Y	12	7,5	T	32	0,32	T	21	0,21	Y	10
Marker89088	51.661	Cma_Chr04	5445979	C	T	T	12	0,12	C	17	17,0	Y	21	11,10	Y	10	6,4	Y	12	10,2	Y	10	4,6	Y	12	11,1	Y	13	2,11	C	20	20,0	Y	15	7,8	Y	14	4,10	Y	5	3,2	T	19	0,19	T	29	0,29	T	13
Marker89478	51.661	Cma_Chr04	5568949	G	A	A	20	1,19	G	20	20,0	R	8	3,5	R	7	4,3	R	11	6,5	A	14	0,14	G	13	12,0	A	14	0,14	G	27	27,0	R	22	14,8	R	8	3,5	R	8	1,7	A	15	1,14	A	24	0,24	R	4
Marker88590	51.661	Cma_Chr04	5357386	G	A	G	12	12,0	A	17	0,17	R	10	2,8	R	6	2,4	A	2	0,2	A	6	0,6	A	14	0,14	G	6	6,0	A	16	0,16	R	21	12,9	R	7	3,4	A	5	0,5	N	.	.	G	19	18,1	R	15
Marker89604	52.161	Cma_Chr04	5588371	C	A	A	16	1,15	C	17	17,0	M	10	3,7	M	3	2,1	M	13	10,3	A	3	0,3	C	5	5,0	N	.	.	C	8	8,0	M	4	1,3	M	4	3,1	M	4	1,3	N	.	.	A	19	0,19	M	4
Marker89085	52.161	Cma_Chr04	5445646	C	T	T	19	0,19	C	20	20,0	Y	5	1,4	T	1	0,1	Y	11	3,8	Y	2	1,1	C	7	7,0	T	5	0,5	C	22	22,0	Y	25	13,12	Y	23	16,6	Y	9	5,4	T	10	0,10	T	18	1,17	Y	8
Marker89272	53.161	Cma_Chr04	5522980	C	T	T	20	1,19	C	19	19,0	Y	5	3,2	T	2	0,2	Y	6	1,5	T	13	0,13	C	1	1,0	T	7	0,7	C	25	25,0	Y	5	4,1	C	7	7,0	T	1	0,1	T	6	0,6	T	7	0,7	Y	5
Marker89273	53.161	Cma_Chr04	5523014	T	C	T	17	16,1	C	23	0,23	Y	5	2,3	T	2	2,0	Y	6	5,1	T	13	13,0	C	1	0,1	T	7	7,0	C	25	0,25	Y	5	1,4	C	7	0,7	T	1	1,0	T	6	6,0	T	7	7,0	Y	5
Marker89434	53.661	Cma_Chr04	5550738	G	A	A	13	0,13	G	14	14,0	R	5	3,1	R	9	1,8	R	5	4,1	A	5	0,5	G	2	2,0	R	4	1,3	G	5	5,0	R	37	13,24	R	8	7,1	R	5	1,4	N	.	.	A	2	0,2	A	3
Marker89610	53.661	Cma_Chr04	5593378	T	A	A	19	1,18	T	15	15,0	T	5	5,0	W	12	8,4	W	36	10,26	A	8	0,8	T	14	13,1	A	19	0,19	T	27	27,0	W	11	10,1	W	23	12,11	W	12	7,5	A	32	0,32	A	21	0,21	W	10
Marker89606	54.161	Cma_Chr04	5588607	C	T	T	15	0,15	C	18	18,0	Y	10	3,7	Y	3	2,1	Y	13	10,3	T	3	0,3	C	5	5,0	N	.	.	C	8	8,0	Y	4	1,3	Y	4	3,1	Y	4	1,3	N	.	.	T	20	1,19	Y	4
Marker89933	54.661	Cma_Chr04	5755705	T	C	C	19	2,17	T	17	17,0	T	10	10,0	Y	13	3,10	Y	14	10,4	C	1	0,1	T	3	3,0	C	2	0,2	T	14	14,0	Y	43	27,16	Y	13	6,7	C	1	0,1	C	6	0,6	C	15	1,14	C	1
Marker90244	55.161	Cma_Chr04	5857780	C	A	C	16	16,0	A	15	0,15	A	17	1,16	C	2	2,0	M	15	6,9	C	7	7,0	A	6	0,6	C	26	26,0	A	21	0,21	M	41	19,22	M	9	6,3	C	4	4,0	C	16	16,0	C	13	13,0	M	12
Marker89697	55.161	Cma_Chr04	5678565	A	G	A	16	16,0	G	16	0,16	G	9	0,9	A	7	7,0	R	32	15,17	A	12	12,0	G	23	0,23	A	20	20,0	G	36	0,36	R	52	27,25	R	31	13,18	A	18	17,1	A	32	32,0	A	29	29,0	R	23
Marker90187	55.661	Cma_Chr04	5832373	C	T	T	27	0,27	C	23	23,0	C	8	8,0	T	12	0,12	Y	27	10,17	Y	15	3,12	C	22	21,1	T	18	0,18	Y	18	16,2	Y	25	12,13	Y	35	16,19	T	11	0,11	Y	27	4,23	T	24	0,24	Y	16
Marker89725	55.661	Cma_Chr04	5714660	A	G	A	13	13,0	G	11	0,11	G	3	0,3	R	3	1,2	R	11	6,5	A	7	7,0	G	9	0,9	A	5	5,0	G	14	0,14	R	7	3,4	R	23	14,9	A	10	10,0	A	17	17,0	A	27	27,0	R	17
Marker90841	56.161	Cma_Chr04	6251210	A	T	T	19	1,18	A	12	12,0	A	41	40,1	T	43	1,42	W	250	119,131	T	64	1,63	A	141	141,0	T	133	1,132	A	85	85,0	W	72	27,45	W	127	72,55	T	87	2,85	T	237	0,237	T	250	1,249	W	90
Marker89796	56.161	Cma_Chr04	5733318	G	C	G	23	23,0	C	24	0,24	C	1	0,1	N	.	.	S	23	12,11	S	2	1,1	C	6	0,6	G	9	9,0	C	3	0,3	G	5	5,0	S	9	2,7	G	7	7,0	G	7	7,0	G	16	15,1	C	6
Marker89699	56.161	Cma_Chr04	5687763	T	A	T	11	11,0	A	10	0,10	A	14	0,14	W	6	3,3	W	29	19,10	T	14	14,0	W	33	3,30	T	19	19,0	A	29	0,29	W	21	10,11	W	34	18,16	T	17	17,0	T	58	58,0	T	31	31,0	W	21
Marker89758	56.161	Cma_Chr04	5720745	A	T	A	18	17,1	T	13	0,13	T	36	0,36	W	22	5,17	W	46	25,21	A	22	21,1	T	29	0,29	A	24	24,0	T	36	1,35	W	10	5,5	W	41	14,27	A	24	24,0	A	63	63,0	A	54	54,0	W	33
Marker91091	56.661	Cma_Chr04	6370841	C	T	T	12	0,12	C	17	17,0	C	2	2,0	T	1	0,1	Y	17	12,5	C	3	2,1	C	7	7,0	T	6	0,6	C	2	2,0	Y	12	4,8	Y	18	16,2	Y	5	1,4	T	2	0,2	T	6	0,6	N	.
Marker90451	56.661	Cma_Chr04	5944009	C	A	A	17	0,17	C	15	15,0	C	15	15,0	A	10	0,10	M	22	10,12	A	9	0,9	C	23	23,0	A	39	1,38	C	26	26,0	M	35	21,14	M	27	5,22	A	13	0,13	A	30	0,30	A	10	0,10	M	11
Marker90065	56.661	Cma_Chr04	5797050	C	T	T	16	0,16	C	17	17,0	C	10	10,0	Y	10	1,9	Y	8	3,5	T	17	0,17	C	38	38,0	T	7	0,7	C	20	20,0	Y	12	9,3	Y	29	10,19	Y	26	2,24	T	18	0,18	T	24	0,24	Y	12
Marker90402	56.661	Cma_Chr04	5931469	G	A	A	20	1,19	G	14	14,0	G	14	14,0	A	19	0,19	R	24	13,11	A	22	0,22	G	14	14,0	A	18	1,17	G	24	24,0	R	40	17,23	R	38	20,18	A	9	0,9	A	25	0,25	A	9	0,9	R	7
Marker90245	56.661	Cma_Chr04	5857992	T	C	T	21	20,1	C	17	0,17	C	17	1,16	T	2	2,0	Y	15	6,9	T	7	7,0	C	6	0,6	T	26	26,0	C	21	0,21	Y	42	19,23	Y	9	6,3	T	4	4,0	T	16	16,0	T	13	13,0	Y	12
Marker90623	56.661	Cma_Chr04	6046579	T	A	T	19	19,0	A	15	0,15	A	26	0,26	T	8	8,0	W	11	8,3	T	11	11,0	A	17	1,16	T	14	14,0	A	19	0,19	W	21	12,9	W	20	13,7	T	11	11,0	T	15	15,0	T	22	22,0	W	8
Marker90544	56.661	Cma_Chr04	5971520	C	T	T	15	0,15	C	25	25,0	C	15	15,0	T	13	0,13	Y	56	30,26	T	13	0,13	C	24	24,0	T	26	0,26	C	18	18,0	Y	7	3,4	Y	26	10,16	T	10	0,10	T	45	1,44	T	37	0,37	Y	12
Marker90793	57.161	Cma_Chr04	6211786	T	A	A	28	1,27	T	19	19,0	T	4	4,0	A	6	0,6	W	6	2,4	N	.	.	T	7	7,0	A	10	0,10	T	9	9,0	W	7	3,4	A	2	0,2	A	3	0,3	A	3	0,3	A	7	0,7	T	5
Marker90795	57.661	Cma_Chr04	6211993	A	G	G	12	1,11	A	12	12,0	A	4	4,0	G	6	0,6	R	6	2,4	N	.	.	A	7	7,0	G	10	0,10	A	9	9,0	R	7	3,4	G	2	0,2	G	3	0,3	G	3	0,3	G	7	0,7	A	5
Marker90842	57.661	Cma_Chr04	6251802	G	A	A	20	0,20	G	18	18,0	G	8	8,0	A	7	0,7	R	37	13,24	R	19	2,17	G	30	30,0	A	15	1,14	G	61	61,0	R	19	15,4	R	55	36,19	A	30	0,30	A	28	0,28	A	62	0,62	R	46
Marker91093	57.661	Cma_Chr04	6370885	C	T	T	10	0,10	C	19	19,0	C	2	2,0	T	2	0,2	Y	17	12,5	Y	3	2,1	C	7	7,0	T	6	0,6	C	2	2,0	Y	12	3,8	Y	18	16,2	Y	5	1,4	T	2	0,2	T	6	0,6	N	.
Marker91092	57.661	Cma_Chr04	6370848	C	G	G	12	0,12	C	17	17,0	C	2	2,0	G	1	0,1	S	17	12,5	S	3	2,1	C	7	7,0	G	6	0,6	C	2	2,0	S	12	4,8	S	18	16,2	S	5	1,4	G	2	0,2	G	6	0,6	N	.
Marker91168	58.161	Cma_Chr04	6407894	C	T	C	13	13,0	T	16	0,16	Y	16	8,8	C	12	12,0	Y	16	8,8	C	16	16,0	T	33	0,33	C	9	9,0	T	27	0,27	Y	11	7,4	Y	37	24,13	C	6	6,0	C	14	14,0	C	21	21,0	Y	6
Marker91323	58.661	Cma_Chr04	6495435	C	T	T	15	0,15	C	31	31,0	Y	6	2,4	T	34	0,34	Y	55	26,29	T	11	0,11	C	48	48,0	T	30	1,28	C	40	39,1	Y	74	37,37	Y	69	39,30	T	39	0,39	T	43	0,43	T	71	0,70	Y	32
Marker90796	58.661	Cma_Chr04	6212043	G	A	A	13	0,13	G	16	16,0	G	4	4,0	A	6	0,6	R	6	2,4	N	.	.	G	7	7,0	A	10	0,10	G	9	9,0	R	7	3,4	A	2	0,2	A	3	0,3	A	3	0,3	A	7	0,7	G	5
Marker91008	58.661	Cma_Chr04	6336070	G	A	A	17	0,17	G	12	12,0	G	4	4,0	A	4	0,4	R	11	7,4	A	9	0,9	G	8	8,0	A	11	0,11	G	11	11,0	G	9	9,0	R	8	5,3	A	3	0,3	A	5	0,5	N	.	.	R	7
Marker91455	59.161	Cma_Chr04	6525995	G	A	G	19	18,1	A	16	0,16	R	6	2,4	N	.	.	R	23	15,8	G	12	12,0	A	14	0,14	R	4	3,1	A	15	0,15	A	2	0,2	R	12	4,8	R	4	3,1	G	12	12,0	R	17	15,2	G	5
Marker91707	61.263	Cma_Chr04	6731304	A	G	A	17	16,1	G	27	0,27	R	23	13,10	A	5	5,0	R	9	6,3	A	15	15,0	G	2	0,2	A	13	13,0	G	31	0,31	G	1	0,1	R	13	3,10	A	10	10,0	A	17	17,0	A	12	12,0	G	3
Marker91445	61.263	Cma_Chr04	6522685	C	T	C	15	14,1	T	14	0,14	Y	17	11,6	C	17	17,0	Y	31	15,16	C	10	10,0	T	20	0,20	C	26	26,0	T	23	1,22	Y	11	7,4	Y	27	16,11	C	15	14,1	C	42	42,0	C	37	37,0	Y	24
Marker91272	61.263	Cma_Chr04	6444735	C	T	C	20	19,1	T	23	0,23	Y	27	17,10	C	13	13,0	Y	15	3,12	C	23	23,0	T	20	0,20	C	19	19,0	T	43	0,43	Y	46	13,33	Y	23	5,18	C	12	12,0	C	14	14,0	C	27	27,0	Y	4
Marker91706	61.263	Cma_Chr04	6731289	G	T	G	16	16,0	T	30	0,30	K	23	13,10	G	5	5,0	K	9	6,3	G	15	15,0	T	2	0,2	G	13	13,0	T	31	0,31	T	1	0,1	K	13	3,10	G	10	10,0	G	17	17,0	G	12	12,0	T	3
Marker91747	61.763	Cma_Chr04	6737655	G	T	G	15	14,1	T	20	0,20	K	14	8,6	G	6	6,0	K	3	2,1	G	7	7,0	T	9	0,9	G	2	2,0	T	3	0,3	K	30	15,15	G	6	6,0	G	3	3,0	N	.	.	G	9	9,0	K	6
Marker91743	62.763	Cma_Chr04	6736651	A	T	A	15	15,0	T	18	0,18	W	26	11,15	A	6	6,0	W	24	11,13	A	19	18,1	T	30	0,30	A	15	15,0	T	49	2,47	W	38	18,20	W	57	16,41	A	11	11,0	A	38	36,2	A	51	49,2	W	39
Marker91456	62.763	Cma_Chr04	6526232	A	G	A	16	15,1	G	14	0,14	R	6	2,4	N	.	.	R	23	15,8	A	13	13,0	G	14	0,14	R	4	3,1	G	15	0,15	G	2	0,2	R	12	4,8	R	4	3,1	A	12	12,0	R	18	16,2	A	5
Marker91817	63.763	Cma_Chr04	6872882	C	T	C	17	17,0	T	18	0,18	Y	26	9,17	C	22	22,0	Y	110	49,61	C	42	42,0	T	58	0,58	C	53	53,0	T	63	0,63	Y	41	19,22	Y	59	34,25	C	37	37,0	C	124	124,0	C	102	101,1	Y	68
Marker91588	63.763	Cma_Chr04	6601517	A	G	A	17	16,1	G	15	0,15	R	6	3,3	A	6	6,0	A	7	7,0	A	7	7,0	G	16	0,16	A	11	11,0	G	21	0,21	R	15	10,5	R	6	4,2	A	7	7,0	A	12	12,0	A	26	26,0	A	5
Marker91704	64.263	Cma_Chr04	6731183	G	A	G	16	15,1	A	24	0,24	R	6	5,1	G	16	16,0	R	57	42,15	G	29	29,0	A	19	0,19	G	28	28,0	R	20	2,18	R	9	5,4	R	55	43,12	G	22	22,0	G	63	63,0	G	63	60,3	R	20
Marker91888	64.763	Cma_Chr04	6916520	T	G	T	15	14,1	G	13	0,13	K	9	5,4	T	4	4,0	K	26	12,14	T	8	8,0	G	3	0,3	T	9	9,0	G	17	0,17	K	26	14,12	K	8	4,4	T	10	10,0	T	9	9,0	T	6	6,0	K	10
Marker91705	64.763	Cma_Chr04	6731200	T	C	T	16	15,1	C	27	0,27	Y	6	5,1	T	16	16,0	Y	55	40,15	T	28	28,0	C	19	0,19	T	28	28,0	Y	20	2,18	Y	9	5,4	Y	55	43,12	T	22	22,0	T	63	63,0	T	59	57,2	Y	20
Marker91735	64.763	Cma_Chr04	6735605	A	G	A	18	18,0	G	15	0,15	R	28	19,9	A	10	10,0	R	40	17,23	A	29	29,0	G	28	0,28	A	17	17,0	G	35	0,35	R	19	4,15	R	46	29,17	A	30	30,0	A	31	31,0	A	53	53,0	R	18
Marker92158	65.763	Cma_Chr04	7106860	T	C	T	18	17,1	C	17	0,17	Y	2	1,1	T	3	3,0	Y	2	1,1	T	5	5,0	C	6	0,6	T	7	7,0	C	8	0,8	Y	11	3,8	C	2	0,2	T	1	1,0	T	4	4,0	T	15	15,0	Y	2
Marker92215	67.264	Cma_Chr04	7116185	G	A	G	12	12,0	A	26	0,26	R	3	1,2	G	6	6,0	R	12	6,6	G	3	3,0	A	5	0,5	G	6	6,0	A	11	0,11	R	31	10,21	R	17	9,8	G	9	9,0	R	9	4,5	R	6	5,1	R	6
Marker92324	67.764	Cma_Chr04	7259611	T	C	C	12	0,12	T	19	19,0	Y	9	1,8	C	5	0,5	Y	6	3,3	C	5	0,5	Y	12	4,8	N	.	.	T	8	8,0	Y	11	8,3	Y	10	6,4	C	16	0,16	Y	5	2,3	C	4	0,4	Y	6
Marker92461	68.764	Cma_Chr04	7290100	T	A	A	17	1,16	T	17	17,0	W	2	1,1	N	.	.	W	6	3,3	A	2	0,2	A	4	0,4	W	6	4,2	T	10	10,0	W	40	25,15	T	1	1,0	A	1	0,1	N	.	.	A	14	0,14	A	3
Marker92462	69.764	Cma_Chr04	7290334	C	T	T	13	0,13	C	13	13,0	Y	2	1,1	N	.	.	Y	6	3,3	T	2	0,2	T	4	0,4	Y	6	4,2	C	10	10,0	Y	40	25,15	C	1	1,0	T	1	0,1	N	.	.	T	14	0,14	T	3
Marker92363	69.764	Cma_Chr04	7266586	A	G	G	11	0,11	A	15	15,0	R	4	3,1	G	7	0,7	G	7	0,7	G	3	0,3	A	2	2,0	R	7	1,6	A	4	4,0	R	7	2,5	G	6	0,6	G	6	0,6	R	2	1,1	G	23	0,23	R	8
Marker92610	70.264	Cma_Chr04	7359363	T	A	T	19	19,0	A	16	0,16	W	6	1,5	W	4	2,2	W	6	2,4	T	3	3,0	T	2	2,0	T	3	3,0	A	8	0,8	W	42	21,21	W	16	4,12	W	5	3,2	W	6	2,4	W	5	3,2	T	3
Marker92586	71.764	Cma_Chr04	7353405	T	A	A	13	0,13	T	27	27,0	W	14	10,4	A	11	0,11	W	8	2,6	A	8	0,8	W	13	9,4	W	18	5,13	W	27	22,5	W	27	10,17	W	9	2,7	A	5	0,5	W	5	3,2	A	17	0,17	W	19
Marker92531	72.765	Cma_Chr04	7343558	T	C	C	28	1,27	T	21	21,0	Y	11	4,7	C	11	0,11	Y	17	9,8	C	7	0,7	Y	19	10,9	Y	11	5,6	T	14	14,0	Y	40	20,20	Y	23	15,8	C	10	0,10	Y	12	10,2	C	10	0,10	Y	18
Marker93043	72.765	Cma_Chr04	7469837	A	C	A	16	16,0	C	14	0,14	M	22	5,17	M	18	7,11	M	22	13,9	A	26	26,0	M	29	12,17	M	15	9,6	C	31	0,31	M	18	16,2	M	21	12,9	A	17	17,0	M	24	7,17	A	22	22,0	M	15
Marker93329	72.765	Cma_Chr04	7520046	G	A	G	16	16,0	A	21	0,21	R	43	20,23	R	20	8,12	R	81	36,45	G	55	52,2	R	66	40,26	R	59	27,32	A	49	0,49	R	33	24,9	R	83	34,49	G	41	41,0	R	94	50,44	G	86	84,2	R	44
Marker93087	72.765	Cma_Chr04	7477912	C	T	C	18	17,1	T	17	0,17	Y	76	34,42	Y	29	17,12	Y	130	83,47	C	76	75,1	Y	70	35,35	Y	68	37,31	T	65	0,65	Y	41	22,19	Y	68	31,37	C	69	69,0	Y	161	78,82	C	183	181,2	Y	77
Marker93086	72.765	Cma_Chr04	7477902	G	T	G	18	17,1	T	17	0,17	K	76	34,42	K	29	17,12	K	130	83,47	G	76	75,1	K	70	35,35	K	68	37,31	T	65	0,65	K	41	22,19	K	68	31,37	G	69	69,0	K	161	79,82	G	182	179,2	K	77
Marker93611	72.765	Cma_Chr04	7587475	G	A	A	15	0,15	G	10	10,0	R	39	11,28	R	31	11,20	R	22	8,14	A	18	0,18	R	33	19,14	R	21	9,12	G	20	20,0	R	41	11,30	R	31	13,17	A	14	0,14	R	30	21,9	A	20	0,20	R	15
Marker93463	72.765	Cma_Chr04	7552585	T	C	T	17	16,1	C	19	0,19	Y	21	6,15	Y	33	16,17	Y	82	40,42	T	50	50,0	Y	99	53,46	Y	39	23,16	C	48	0,48	Y	101	44,57	Y	60	28,32	T	54	53,1	Y	89	45,44	T	97	95,2	Y	44
Marker93099	72.765	Cma_Chr04	7479658	C	T	C	10	10,0	T	21	0,21	Y	12	2,10	Y	21	4,17	Y	25	6,19	C	11	11,0	Y	21	11,10	Y	10	4,6	T	21	0,21	Y	6	1,5	Y	18	10,8	C	7	7,0	Y	26	8,18	C	18	18,0	Y	8
Marker92745	72.765	Cma_Chr04	7387819	C	A	A	19	1,18	C	22	22,0	M	4	2,2	M	5	3,2	C	3	3,0	A	4	0,4	M	7	2,5	M	5	1,4	C	9	9,0	A	2	0,2	M	10	4,6	N	.	.	M	6	4,2	A	9	0,9	N	.
Marker92922	72.765	Cma_Chr04	7421366	C	T	T	16	1,15	C	17	17,0	C	3	3,0	C	14	13,1	C	4	4,0	T	3	0,3	Y	6	1,5	Y	8	2,6	C	3	3,0	Y	54	26,28	Y	6	5,1	T	4	0,4	Y	4	2,2	T	9	0,9	T	2
Marker93610	73.265	Cma_Chr04	7587196	T	G	G	16	0,16	T	21	21,0	K	16	7,9	K	4	3,1	K	14	10,4	K	7	1,6	K	12	4,8	K	7	5,2	T	8	8,0	K	70	34,36	K	11	6,5	G	4	0,4	K	7	4,3	G	9	0,9	K	6
Marker92505	73.265	Cma_Chr04	7297896	T	C	C	15	0,15	T	19	19,0	Y	37	26,11	C	13	0,13	Y	29	24,5	C	33	0,33	Y	52	38,13	Y	59	34,25	T	48	47,1	Y	11	6,5	Y	44	22,22	C	12	0,12	Y	75	49,26	C	40	0,40	Y	23
Marker92591	73.265	Cma_Chr04	7353810	C	A	A	15	0,15	C	17	17,0	M	7	5,2	A	8	0,8	M	42	26,16	A	1	0,1	M	30	18,12	M	20	8,12	C	33	32,1	M	22	13,9	M	17	10,7	A	18	0,18	M	26	7,19	A	27	0,27	M	25
Marker92446	73.265	Cma_Chr04	7288375	G	A	A	15	0,15	G	20	20,0	R	23	9,14	A	22	0,22	R	42	18,24	A	24	0,24	R	31	14,17	R	37	25,12	G	32	32,0	R	12	4,8	R	47	28,19	A	35	0,35	R	62	33,29	A	31	2,29	R	15
Marker92443	73.265	Cma_Chr04	7288069	G	C	C	13	0,13	G	12	12,0	S	23	9,14	C	22	0,22	S	42	18,24	C	24	0,24	S	31	14,17	S	37	25,12	G	32	32,0	S	12	4,8	S	47	27,19	C	35	0,35	S	62	33,29	C	31	2,29	S	15
Marker93772	73.765	Cma_Chr04	7653955	G	C	G	11	11,0	C	21	0,21	S	15	7,8	S	15	7,8	S	12	8,4	S	28	24,3	S	25	22,3	S	29	14,15	C	17	0,17	S	59	19,40	G	22	22,0	S	13	11,2	S	17	9,8	G	14	14,0	S	10
Marker93889	75.265	Cma_Chr04	7875784	C	T	T	20	1,19	C	17	17,0	Y	11	6,5	T	2	0,2	Y	14	5,9	T	19	1,18	Y	17	2,15	Y	18	3,15	C	9	9,0	Y	21	6,15	Y	5	1,4	T	8	0,8	Y	6	3,3	T	46	0,46	Y	11
Marker94271	76.265	Cma_Chr04	8004189	G	T	G	17	17,0	T	17	0,17	K	24	21,3	G	18	17,1	K	25	14,11	G	31	28,3	K	33	16,17	K	23	17,6	T	32	0,32	K	14	4,10	K	26	14,12	K	13	5,8	K	28	16,12	G	28	27,1	K	20
Marker94206	76.765	Cma_Chr04	7976562	G	A	G	13	13,0	A	16	0,16	R	18	11,7	R	25	12,13	R	25	4,21	G	20	20,0	R	42	13,29	R	34	17,17	A	56	2,54	R	32	23,9	R	44	21,23	R	34	17,17	R	51	15,36	G	58	57,1	R	28
Marker94050	78.266	Cma_Chr04	7917344	A	G	A	15	15,0	G	13	0,13	R	14	9,5	R	20	10,10	R	135	62,73	A	16	16,0	R	94	64,30	R	53	29,24	G	66	3,63	R	28	4,23	R	54	35,19	R	43	16,27	R	147	83,64	A	112	111,1	R	36
Marker94419	78.766	Cma_Chr04	8116824	T	C	T	16	16,0	C	14	0,14	Y	3	2,1	T	3	3,0	Y	23	10,13	T	5	5,0	Y	6	3,3	C	9	0,9	C	8	0,8	Y	17	10,7	T	1	1,0	Y	9	2,7	Y	9	3,6	T	31	31,0	Y	7
Marker94339	79.266	Cma_Chr04	8097786	A	G	A	10	10,0	G	19	0,19	R	29	13,16	R	24	19,5	R	100	42,58	A	45	45,0	R	91	40,51	R	58	29,29	G	67	0,67	R	22	10,12	A	65	64,1	R	45	20,25	R	90	39,50	A	93	92,1	R	32
Marker94049	79.266	Cma_Chr04	7917305	A	C	A	18	17,1	C	16	0,16	M	14	9,5	M	20	10,10	M	135	62,73	A	16	16,0	M	94	64,30	M	53	29,24	C	66	3,63	M	28	4,24	M	54	35,19	M	43	16,27	M	147	83,64	A	112	111,1	M	36
Marker93946	79.266	Cma_Chr04	7893485	C	T	C	12	12,0	T	27	0,27	Y	9	4,5	Y	36	11,25	Y	20	12,8	C	14	14,0	Y	31	17,14	Y	37	23,14	T	17	0,17	Y	25	17,8	Y	9	6,3	Y	22	9,13	Y	35	16,19	C	45	44,1	Y	7
Marker94090	79.266	Cma_Chr04	7927689	T	G	G	21	1,20	T	13	13,0	K	22	17,5	K	8	2,6	K	7	2,5	G	8	0,8	K	6	5,1	K	8	2,6	T	31	31,0	K	27	9,18	K	12	4,8	K	13	8,5	K	6	5,1	G	18	0,18	K	10
Marker94065	79.266	Cma_Chr04	7921022	C	T	C	15	15,0	T	21	0,21	Y	3	1,2	Y	12	1,11	Y	22	16,6	C	3	3,0	Y	6	1,5	Y	8	7,1	T	13	0,13	Y	20	11,9	Y	24	11,13	T	11	0,11	T	15	0,15	C	25	25,0	Y	14
Marker94064	79.266	Cma_Chr04	7920985	A	G	G	12	0,12	A	22	22,0	R	3	2,1	R	12	11,1	R	22	6,16	G	3	0,3	R	6	5,1	R	7	1,6	A	13	13,0	R	20	9,11	R	24	13,11	A	11	11,0	A	13	13,0	G	23	0,23	R	14
Marker94066	79.266	Cma_Chr04	7921044	A	G	G	15	0,15	A	18	18,0	R	3	2,1	R	12	11,1	R	22	6,16	G	3	0,3	R	6	5,1	R	8	2,6	A	13	13,0	R	20	9,11	R	24	13,11	A	11	11,0	A	15	15,0	G	25	0,25	R	14
Marker93890	79.266	Cma_Chr04	7875820	C	T	T	10	0,10	C	18	18,0	Y	11	6,5	T	2	0,2	Y	14	5,9	T	20	1,19	Y	17	2,15	Y	18	3,15	C	9	9,0	Y	21	6,15	Y	5	1,4	T	8	0,8	Y	6	3,3	T	45	0,45	Y	11
Marker94530	80.266	Cma_Chr04	8149250	A	T	A	23	23,0	T	24	0,24	W	27	20,7	W	16	10,6	W	15	8,7	A	17	17,0	W	7	1,6	W	26	9,17	T	30	0,30	W	15	6,9	A	32	31,1	W	13	9,4	W	22	8,14	A	16	16,0	W	14
Marker94267	80.266	Cma_Chr04	8002997	A	T	A	18	18,0	T	25	1,24	T	2	0,2	T	6	0,6	W	17	7,10	A	12	12,0	W	23	11,12	W	13	6,7	T	20	0,20	W	13	4,9	W	9	1,8	W	12	2,10	W	26	7,19	A	22	22,0	W	14
Marker94476	83.37	Cma_Chr04	8136260	T	A	T	12	12,0	A	14	0,14	W	7	4,3	W	22	17,5	W	31	18,13	T	22	22,0	W	41	23,18	W	14	6,8	A	17	0,17	W	67	23,44	T	12	12,0	W	12	4,8	W	36	27,9	T	17	16,0	W	21
Marker94360	83.37	Cma_Chr04	8101829	C	T	C	14	14,0	T	21	0,21	Y	31	18,13	Y	18	5,13	Y	39	22,17	C	19	19,0	Y	26	5,21	Y	13	3,10	T	28	0,28	Y	40	28,12	Y	25	23,2	Y	14	9,5	Y	37	24,13	C	28	28,0	Y	18
Marker94923	83.87	Cma_Chr04	8483742	G	A	G	18	17,1	A	18	0,18	R	45	22,23	R	29	14,15	R	81	48,33	G	44	44,0	R	56	28,28	R	55	19,36	A	57	0,57	R	31	17,14	G	53	53,0	R	59	30,29	R	107	46,61	R	86	38,48	R	67
Marker94882	85.075	Cma_Chr04	8474466	A	G	A	15	15,0	G	20	0,20	R	11	5,6	R	6	2,4	R	13	8,5	A	9	9,0	R	10	9,1	R	2	1,1	G	9	0,9	R	42	23,19	A	14	14,0	R	12	7,5	R	6	3,3	R	18	8,10	R	20
Marker94970	85.575	Cma_Chr04	8542875	G	A	A	13	0,13	G	14	14,0	R	10	8,2	R	8	6,2	R	34	16,18	A	20	0,20	R	16	4,12	R	11	5,6	G	22	22,0	R	24	13,11	A	26	0,26	R	16	7,9	R	47	27,20	R	27	7,20	R	7
Marker94641	85.575	Cma_Chr04	8223708	C	A	C	21	21,0	A	24	0,24	M	39	15,24	M	39	14,25	M	77	44,33	C	43	43,0	M	77	32,45	M	57	23,34	A	64	1,63	M	28	21,7	C	71	71,0	M	61	30,31	M	87	46,41	C	100	100,0	M	46
Marker95030	86.78	Cma_Chr04	8563518	G	A	A	17	0,17	G	17	17,0	R	17	7,10	R	7	3,4	R	31	17,14	A	20	0,20	G	16	15,1	R	12	9,3	G	10	10,0	R	29	15,14	R	10	1,9	R	6	4,2	R	25	11,14	R	20	8,12	R	9
Marker95029	87.28	Cma_Chr04	8563260	C	T	T	16	0,16	C	20	20,0	Y	18	8,10	Y	16	5,11	Y	26	6,20	T	12	0,12	Y	20	7,13	Y	15	6,9	C	14	13,1	Y	59	27,32	T	33	1,31	Y	13	9,4	Y	23	13,10	Y	29	8,20	Y	9
Marker95187	88.28	Cma_Chr04	8606133	T	C	C	17	0,17	T	23	23,0	Y	19	10,9	Y	24	6,18	Y	42	15,27	C	22	0,22	Y	33	9,24	Y	50	22,28	T	50	50,0	Y	38	16,22	C	55	2,53	Y	28	14,14	Y	27	11,16	Y	41	29,12	Y	10
Marker95326	89.281	Cma_Chr04	8744993	G	T	G	22	21,1	T	24	0,24	G	15	14,1	G	4	4,0	K	31	19,12	G	19	19,0	G	12	11,1	K	11	7,4	T	24	0,24	K	20	14,6	G	22	21,1	K	5	4,1	G	7	7,0	K	26	23,3	K	5
Marker95121	89.281	Cma_Chr04	8602356	A	G	G	20	1,19	A	22	22,0	R	18	6,12	R	20	9,11	R	119	42,77	R	31	3,28	R	88	37,51	R	98	50,47	A	56	55,1	R	33	13,20	G	107	2,105	R	62	28,34	R	171	70,100	R	171	88,83	R	62
Marker95186	89.281	Cma_Chr04	8606104	A	G	G	17	0,17	A	21	21,0	R	19	10,9	R	24	6,18	R	42	15,27	G	22	0,22	R	33	9,24	R	50	22,28	A	50	50,0	R	38	16,22	G	55	2,53	R	28	14,14	R	27	11,16	R	41	29,12	R	10
Marker95391	89.781	Cma_Chr04	8808948	T	C	C	17	0,17	T	17	17,0	Y	8	3,5	Y	13	7,6	Y	28	13,15	C	22	0,22	Y	24	11,13	C	32	0,32	T	33	33,0	Y	11	7,4	C	32	0,32	Y	20	11,9	Y	17	5,12	T	5	5,0	Y	10
Marker95312	89.781	Cma_Chr04	8733545	C	T	T	13	0,13	C	27	27,0	C	2	2,0	N	.	.	N	.	.	T	3	0,3	T	8	0,8	Y	10	6,4	Y	5	4,1	Y	12	9,3	T	2	0,2	Y	10	6,4	Y	5	2,3	C	1	1,0	Y	6
Marker95314	90.281	Cma_Chr04	8733719	G	A	A	12	0,12	G	18	18,0	G	2	2,0	N	.	.	N	.	.	A	3	0,3	A	8	0,8	R	10	6,4	R	5	4,1	R	11	8,3	A	2	0,2	R	10	6,4	R	5	2,3	G	1	1,0	R	6
Marker95298	91.281	Cma_Chr04	8729690	C	T	C	22	22,0	T	24	0,24	Y	8	6,2	T	5	0,5	N	.	.	C	13	13,0	Y	12	4,8	Y	11	4,7	Y	11	1,10	Y	25	8,17	C	16	16,0	Y	4	2,2	Y	7	4,3	Y	10	6,4	Y	11
Marker95716	91.781	Cma_Chr04	8879703	T	A	A	11	0,11	T	21	21,0	W	3	1,2	W	5	3,2	W	13	11,2	A	1	0,1	W	15	7,8	A	13	0,13	T	10	10,0	W	7	2,5	W	7	1,6	W	13	12,1	W	18	15,3	W	22	20,2	W	6
Marker95387	91.781	Cma_Chr04	8808510	A	T	T	16	1,15	A	27	27,0	W	10	7,3	W	5	1,4	W	19	16,3	T	9	0,9	W	23	16,7	T	16	0,16	A	8	8,0	W	12	8,4	T	11	0,11	W	11	6,5	W	11	4,7	W	11	7,4	W	2
Marker95299	91.781	Cma_Chr04	8729714	G	A	A	22	0,22	G	22	22,0	R	8	2,6	G	5	5,0	A	1	0,1	A	13	0,13	R	12	8,4	R	11	7,4	R	11	10,1	R	25	17,8	A	16	0,16	R	4	2,2	R	7	3,4	R	10	4,6	R	11
Marker95851	92.281	Cma_Chr04	9024199	C	T	T	25	1,24	C	15	15,0	Y	4	1,3	Y	20	8,12	Y	10	3,7	T	7	0,7	Y	17	7,10	T	17	0,17	C	8	8,0	Y	12	6,6	T	15	0,15	Y	9	6,3	Y	16	6,10	Y	20	2,18	C	2
Marker95592	92.281	Cma_Chr04	8853567	G	A	A	14	0,14	G	21	21,0	R	10	4,6	R	6	5,1	R	39	20,19	A	18	0,18	R	22	12,10	A	18	0,18	G	22	22,0	R	6	4,2	A	43	0,43	R	7	3,4	R	26	19,7	R	17	10,7	R	23
Marker95591	92.281	Cma_Chr04	8853508	G	A	A	16	0,16	G	28	28,0	R	10	4,6	R	6	5,1	R	39	20,19	A	18	0,18	R	22	12,10	A	18	0,18	G	22	21,0	R	6	4,2	A	45	0,45	R	7	3,4	R	26	19,7	R	17	10,7	R	23
Marker95390	92.281	Cma_Chr04	8808942	G	A	A	17	0,17	G	16	16,0	R	8	3,5	R	13	7,6	R	28	13,15	A	22	0,22	R	24	11,13	A	32	0,32	G	33	33,0	R	11	7,4	A	32	0,32	R	20	11,9	R	17	5,12	G	5	5,0	R	10
Marker95389	92.281	Cma_Chr04	8808892	T	G	G	18	0,18	T	13	13,0	K	8	3,5	K	13	7,6	K	28	13,15	G	22	0,22	K	27	14,13	G	32	0,32	T	33	33,0	K	11	7,4	G	32	0,32	K	20	11,9	K	17	5,12	T	5	5,0	K	10
Marker96307	93.281	Cma_Chr04	9321584	A	T	A	15	14,1	T	17	0,17	W	15	7,8	W	8	6,2	W	12	2,10	A	11	11,0	W	11	2,9	A	13	12,1	T	28	0,28	W	7	3,4	A	27	27,0	W	22	15,7	W	34	22,12	T	13	0,13	T	11
Marker95727	93.281	Cma_Chr04	8882903	T	C	C	21	1,20	T	19	19,0	Y	4	3,1	Y	9	3,6	Y	28	20,8	C	16	0,16	Y	30	4,26	Y	22	2,20	T	32	31,1	Y	18	11,7	C	62	1,61	Y	15	8,7	Y	27	4,23	Y	43	17,26	Y	12
Marker96608	95.883	Cma_Chr04	9397507	G	T	G	23	22,1	T	26	0,26	K	43	15,28	K	10	5,5	K	40	12,28	K	24	21,2	K	66	15,51	G	9	9,0	T	23	0,23	K	42	17,24	G	35	35,0	K	22	13,9	K	35	17,18	T	46	0,46	T	25
Marker97035	97.884	Cma_Chr04	9480899	T	C	T	11	11,0	C	16	0,16	Y	64	38,26	Y	36	24,12	Y	97	33,64	T	66	64,1	Y	59	37,22	T	52	52,0	C	93	0,93	Y	56	25,31	T	85	84,1	Y	40	25,15	Y	111	40,71	C	87	0,87	C	36
Marker96653	100.988	Cma_Chr04	9407112	G	A	G	23	22,1	A	20	0,20	R	24	12,12	R	6	4,2	R	27	6,21	G	24	24,0	R	16	11,5	G	24	24,0	A	29	0,29	R	30	12,18	G	26	26,0	R	19	11,8	R	28	16,12	A	21	0,21	R	14
Marker96607	100.988	Cma_Chr04	9397495	G	A	G	22	21,1	A	24	0,24	R	43	15,28	R	10	5,5	R	40	12,28	G	24	21,2	R	66	15,51	G	9	9,0	A	23	0,23	R	42	17,25	G	35	35,0	R	22	13,9	R	35	17,18	A	46	0,46	A	25
Marker96652	101.988	Cma_Chr04	9407097	G	A	G	25	24,1	A	18	0,18	R	24	12,12	R	6	4,2	R	28	6,22	G	24	24,0	R	16	11,5	G	24	24,0	A	30	0,30	R	30	12,18	G	26	26,0	R	19	11,8	R	28	16,12	A	21	0,21	R	14
Marker96127	102.989	Cma_Chr04	9275040	T	C	T	17	17,0	C	21	0,21	Y	23	14,9	Y	10	7,3	Y	16	10,6	T	26	26,0	Y	17	11,6	T	38	38,0	C	17	0,17	Y	23	11,12	T	36	36,0	Y	8	4,4	Y	35	32,3	C	29	0,29	C	12
Marker96703	102.989	Cma_Chr04	9412923	C	T	C	11	11,0	T	15	0,15	Y	27	10,17	Y	27	10,16	Y	53	37,16	C	41	38,2	Y	42	16,26	C	32	32,0	T	29	0,29	C	3	3,0	C	44	44,0	Y	26	14,12	Y	29	15,14	T	29	0,29	T	16
Marker96701	102.989	Cma_Chr04	9412684	G	A	G	18	18,0	A	25	0,25	R	27	10,17	R	26	10,16	R	52	37,15	G	41	39,2	R	42	16,26	G	32	32,0	A	29	0,29	G	3	3,0	G	43	43,0	R	25	13,12	R	29	15,14	A	28	0,28	A	17
Marker96700	102.989	Cma_Chr04	9412634	T	G	T	15	15,0	G	25	0,25	K	27	10,17	K	26	10,16	K	52	37,15	T	41	39,2	K	42	16,26	T	32	32,0	G	28	0,28	T	3	3,0	T	43	43,0	K	25	13,12	K	29	15,14	G	28	0,28	G	17
Marker97339	102.989	Cma_Chr04	9584327	A	T	T	17	1,16	A	16	16,0	T	8	0,8	W	3	1,2	W	21	15,6	T	2	0,2	W	12	3,9	T	12	0,12	A	16	16,0	W	23	14,9	T	23	0,23	A	1	1,0	W	16	11,5	A	30	30,0	A	13
Marker97107	102.989	Cma_Chr04	9492628	T	G	T	13	13,0	G	10	0,10	K	12	11,1	K	7	2,5	G	1	0,1	T	1	1,0	K	13	7,6	T	14	14,0	G	6	0,6	K	22	14,8	T	2	2,0	K	4	3,1	T	1	1,0	G	5	0,5	N	.
Marker96799	102.989	Cma_Chr04	9436051	C	T	C	25	24,1	T	17	0,17	Y	16	6,10	Y	9	4,5	Y	33	22,11	C	29	27,2	Y	22	14,8	C	15	15,0	T	38	0,38	Y	31	21,10	C	29	28,1	Y	15	9,6	Y	32	20,12	T	36	0,36	T	16
Marker96797	102.989	Cma_Chr04	9435419	G	A	G	16	16,0	A	16	0,16	R	14	8,6	R	17	5,12	R	33	16,17	G	15	14,1	R	22	5,16	G	16	16,0	A	23	0,23	R	45	15,30	G	30	28,2	R	15	8,7	R	26	14,12	A	40	0,40	A	25
Marker97170	102.989	Cma_Chr04	9507665	G	A	G	15	15,0	A	23	0,23	R	6	4,2	R	6	3,3	R	14	5,9	G	6	5,1	R	7	2,5	G	12	12,0	R	10	2,8	R	26	12,14	G	12	12,0	R	8	7,1	R	7	3,4	A	5	0,5	A	6
Marker96651	103.989	Cma_Chr04	9407091	T	C	T	26	25,1	C	16	0,16	Y	24	12,12	Y	6	4,2	Y	28	6,22	T	24	24,0	Y	16	11,5	T	24	24,0	C	30	0,30	Y	30	12,18	T	26	26,0	Y	19	11,8	Y	28	16,12	C	21	0,21	Y	14
Marker97421	104.489	Cma_Chr04	9660030	C	T	T	13	0,13	C	14	14,0	Y	7	2,5	Y	8	3,5	T	18	0,18	T	20	0,20	Y	29	12,17	Y	27	12,15	Y	44	26,18	C	3	3,0	T	13	1,12	Y	10	9,1	Y	28	11,17	C	37	37,0	C	38
Marker97093	104.489	Cma_Chr04	9490133	T	C	T	19	18,1	C	20	0,20	Y	11	2,9	C	6	0,6	T	1	1,0	T	6	6,0	Y	14	8,6	T	17	17,0	C	16	0,16	Y	35	25,10	Y	13	11,2	Y	2	1,1	Y	7	3,4	C	17	0,17	C	2
Marker97885	105.989	Cma_Chr04	9727927	A	G	G	18	0,18	A	15	15,0	R	3	2,1	R	8	5,3	G	29	0,29	G	6	0,6	R	14	7,7	R	18	8,10	R	28	16,12	R	26	14,12	G	30	0,30	A	6	6,0	R	18	6,12	A	44	41,0	A	24
Marker97573	107.49	Cma_Chr04	9686555	T	C	C	14	0,14	T	14	14,0	Y	45	17,28	Y	15	7,8	C	34	0,34	C	31	0,31	Y	38	23,15	Y	42	27,15	Y	38	26,12	Y	26	15,11	C	33	0,33	T	20	20,0	Y	40	33,7	T	27	27,0	T	31
Marker97745	107.99	Cma_Chr04	9706589	C	G	G	18	1,17	C	26	26,0	S	16	9,7	S	13	9,4	G	28	0,28	G	19	1,18	S	21	12,9	S	10	2,8	S	20	8,12	S	3	2,1	G	14	0,14	C	6	6,0	S	10	4,6	C	15	15,0	S	6
Marker97438	107.99	Cma_Chr04	9670569	C	G	G	21	0,21	C	10	10,0	S	8	4,4	S	16	6,10	G	50	0,50	G	11	0,11	S	45	23,22	S	37	22,15	S	48	22,26	S	76	39,37	G	48	0,48	C	23	23,0	S	26	15,11	C	33	32,1	C	36
Marker98914	108.49	Cma_Chr04	10066628	G	A	G	20	20,0	A	16	0,16	R	18	14,4	R	5	2,3	G	10	10,0	G	7	7,0	G	2	2,0	R	11	7,4	R	13	8,5	R	15	9,6	G	10	10,0	A	5	0,5	N	.	.	A	3	0,3	A	3
Marker97467	108.49	Cma_Chr04	9672812	T	C	C	17	0,17	T	19	19,0	Y	18	13,5	Y	9	5,4	C	31	0,31	C	6	0,6	Y	24	19,5	Y	12	10,2	Y	22	13,9	Y	20	11,9	C	12	0,12	T	20	20,0	Y	16	12,4	T	23	23,0	T	5
Marker97466	108.49	Cma_Chr04	9672744	T	C	C	19	0,19	T	14	14,0	Y	18	13,5	Y	9	5,4	C	31	0,31	C	6	0,6	Y	24	19,5	Y	12	10,2	Y	22	13,9	Y	20	11,9	C	12	0,12	T	20	20,0	Y	16	12,4	T	23	23,0	T	5
Marker97461	108.49	Cma_Chr04	9672580	C	T	T	11	0,11	C	20	20,0	Y	18	13,5	Y	9	5,4	T	31	0,31	T	6	0,6	Y	24	19,5	Y	12	10,2	Y	22	13,9	Y	20	11,9	T	13	0,13	C	20	20,0	Y	16	11,4	C	23	23,0	C	5
Marker97874	108.99	Cma_Chr04	9725362	G	A	A	21	1,20	G	15	15,0	R	10	6,4	R	20	2,18	A	30	0,30	A	12	0,12	R	29	19,10	R	40	16,24	R	35	15,20	R	51	21,30	A	19	0,19	G	19	19,0	R	19	9,10	G	23	23,0	R	15
Marker97690	108.99	Cma_Chr04	9699964	T	C	C	15	0,15	T	18	18,0	Y	18	3,15	Y	14	4,10	C	24	0,24	C	16	0,16	Y	12	4,8	Y	16	7,9	Y	25	13,12	Y	27	9,18	C	20	0,20	T	16	16,0	Y	20	15,5	T	20	20,0	T	21
Marker97439	108.99	Cma_Chr04	9670634	G	A	A	18	0,18	G	14	14,0	R	7	4,3	R	16	6,10	A	49	0,49	A	11	0,11	R	45	23,22	R	36	21,15	R	48	22,26	R	75	38,37	A	48	0,48	G	23	23,0	R	26	15,11	G	32	32,0	G	36
Marker97383	108.99	Cma_Chr04	9613555	A	G	G	22	0,22	A	23	23,0	R	8	5,3	R	21	10,11	G	20	0,20	G	15	0,15	R	50	20,30	R	21	16,5	A	22	22,0	R	37	21,16	R	27	2,25	A	19	19,0	R	36	12,24	A	47	47,0	A	11
Marker97382	108.99	Cma_Chr04	9613525	G	A	A	19	0,19	G	26	26,0	R	8	5,3	R	21	10,11	A	20	0,20	A	15	0,15	R	50	20,30	R	21	16,5	G	22	22,0	R	37	21,16	R	27	2,25	G	19	19,0	R	36	12,24	G	47	47,0	G	11
Marker97873	108.99	Cma_Chr04	9725304	A	G	G	27	0,27	A	16	16,0	R	10	6,4	R	20	2,18	G	30	0,30	G	12	0,12	R	28	18,10	R	41	14,27	R	35	15,20	R	51	20,30	G	19	0,19	A	19	19,0	R	19	9,10	A	23	23,0	R	15
Marker98913	109.49	Cma_Chr04	10066438	T	C	T	18	17,1	C	17	0,17	Y	19	9,10	Y	9	8,1	T	13	13,0	T	8	8,0	T	5	5,0	Y	10	5,5	Y	30	16,14	Y	8	3,5	T	19	18,1	C	8	0,8	Y	13	6,7	C	17	0,17	C	13
Marker97593	109.49	Cma_Chr04	9688159	T	C	C	19	0,19	T	13	13,0	Y	14	4,10	Y	23	11,12	C	23	1,22	C	45	0,45	Y	23	16,7	Y	20	12,8	Y	30	14,16	Y	15	7,8	C	17	0,17	T	7	7,0	Y	26	22,4	T	22	22,0	Y	20
Marker97691	109.49	Cma_Chr04	9699976	A	C	C	15	1,14	A	18	18,0	M	18	3,15	M	14	4,10	C	24	0,24	C	16	0,16	M	12	4,8	M	16	7,9	M	25	13,12	M	27	9,18	C	20	0,20	A	16	16,0	M	20	15,5	A	20	20,0	A	21
Marker99643	109.99	Cma_Chr04	10174506	G	T	G	13	13,0	T	13	0,13	G	4	4,0	G	1	1,0	G	22	22,0	G	6	6,0	G	25	25,0	K	16	4,12	K	33	18,15	K	7	2,5	G	21	21,0	T	8	0,8	K	30	13,17	T	26	0,26	T	13
Marker99770	110.49	Cma_Chr04	10187081	A	G	A	22	20,2	G	22	0,22	R	14	9,5	R	5	3,2	A	16	16,0	A	7	7,0	A	20	20,0	R	10	6,4	R	10	7,3	R	15	10,5	A	12	12,0	R	11	1,10	R	26	17,9	G	25	0,25	G	13
Marker98912	110.49	Cma_Chr04	10066430	T	C	T	18	17,1	C	16	0,16	Y	19	9,10	Y	9	8,1	T	13	13,0	T	8	8,0	T	5	5,0	Y	10	5,5	Y	30	16,14	Y	8	3,5	T	19	18,1	C	8	0,8	Y	13	6,7	C	17	0,17	C	13
Marker98906	110.49	Cma_Chr04	10066156	G	A	G	11	11,0	A	25	0,25	R	18	8,10	R	9	8,1	G	12	12,0	G	7	7,0	G	5	5,0	R	10	5,5	R	30	16,14	R	8	3,5	G	19	18,1	A	8	0,8	R	13	6,7	A	17	0,17	A	14
Marker102038	110.49	Cma_Chr04	10495943	G	A	A	19	1,18	G	16	16,0	N	.	.	R	3	2,1	A	8	0,8	A	10	0,10	A	9	0,8	R	10	5,5	R	6	4,2	R	22	12,10	A	19	0,19	N	.	.	R	6	4,2	G	1	1,0	G	5
Marker102381	110.49	Cma_Chr04	10540403	C	T	T	18	1,17	C	30	30,0	Y	9	6,3	C	5	5,0	T	9	0,9	T	11	0,11	T	12	0,12	Y	13	7,6	Y	18	15,3	Y	9	5,4	T	12	0,12	Y	17	13,4	Y	3	2,1	C	11	11,0	C	10
Marker98916	110.49	Cma_Chr04	10066810	C	A	C	10	10,0	A	22	0,22	M	18	14,4	M	5	2,3	C	10	10,0	C	7	7,0	C	2	2,0	M	11	7,4	M	13	8,5	M	15	9,6	C	10	10,0	A	5	1,4	N	.	.	A	3	0,3	A	3
Marker99641	110.49	Cma_Chr04	10174455	G	C	G	17	17,0	C	11	0,11	G	4	4,0	G	1	1,0	G	22	22,0	G	6	6,0	G	25	25,0	S	14	4,10	S	33	18,15	S	7	2,5	G	21	21,0	C	8	0,8	S	30	13,17	C	26	0,26	C	13
Marker98085	110.99	Cma_Chr04	9803787	C	T	T	14	0,14	C	18	18,0	Y	16	12,4	Y	11	7,4	T	23	0,23	T	21	0,21	T	39	0,39	Y	35	26,9	Y	34	20,14	Y	44	18,26	T	46	1,45	C	4	4,0	Y	39	23,16	C	30	30,0	Y	9
Marker99642	110.99	Cma_Chr04	10174487	T	C	T	14	14,0	C	12	0,12	T	4	4,0	T	1	1,0	T	22	22,0	T	6	6,0	T	25	25,0	Y	16	4,12	Y	33	18,15	Y	7	2,5	T	21	21,0	C	8	0,8	Y	30	13,17	C	26	0,26	C	13
Marker104025	111.99	Cma_Chr04	10723263	A	G	G	17	0,17	A	17	17,0	R	14	6,8	R	12	5,7	G	20	0,20	G	5	0,5	G	23	0,23	R	6	4,2	R	21	11,10	R	13	5,8	G	15	0,15	R	12	11,1	R	16	7,9	A	11	11,0	A	14
Marker99772	111.99	Cma_Chr04	10187703	T	C	T	18	17,1	C	13	0,13	C	4	0,4	Y	10	1,9	Y	22	20,2	T	6	6,0	T	18	17,0	Y	13	5,8	Y	24	9,15	Y	21	11,10	T	9	9,0	C	10	0,10	Y	10	4,6	C	30	0,30	C	17
Marker100333	111.99	Cma_Chr04	10302080	C	A	C	15	15,0	A	26	0,26	M	39	13,25	M	11	5,6	C	57	56,1	C	35	35,0	C	59	57,1	M	39	21,18	M	54	39,14	M	18	4,14	C	47	46,1	A	20	0,20	M	71	25,46	A	84	1,83	A	38
Marker99129	111.99	Cma_Chr04	10090934	T	C	T	10	10,0	C	18	1,17	Y	17	8,9	Y	14	5,9	T	16	16,0	T	14	14,0	T	24	24,0	Y	11	5,6	Y	33	17,16	Y	22	16,6	T	44	42,2	C	9	0,9	Y	11	7,4	C	27	0,27	C	20
Marker99137	111.99	Cma_Chr04	10091799	T	C	T	20	19,1	C	21	0,21	Y	22	14,8	Y	23	18,5	T	53	51,2	T	30	28,1	T	37	37,0	Y	17	3,14	Y	32	14,18	Y	66	29,37	T	49	49,0	C	22	0,22	Y	41	33,8	C	43	0,43	Y	21
Marker99180	111.99	Cma_Chr04	10094715	G	A	G	21	20,1	A	21	1,20	R	33	22,11	R	15	8,7	G	60	58,2	G	31	31,0	G	44	44,0	R	35	21,14	R	86	44,42	R	19	7,12	G	67	67,0	A	43	1,42	R	55	35,20	A	79	1,78	A	52
Marker99176	111.99	Cma_Chr04	10094576	T	C	T	26	25,1	C	16	1,15	Y	33	22,11	Y	15	8,7	T	60	58,2	T	31	31,0	T	44	44,0	Y	35	21,14	Y	85	44,41	Y	19	7,12	T	67	67,0	C	43	1,42	Y	54	34,20	C	79	1,78	C	53
Marker97971	111.99	Cma_Chr04	9785069	A	C	C	18	0,18	A	17	17,0	M	28	14,14	M	13	5,8	C	57	0,57	C	25	1,24	C	79	0,79	M	55	27,28	M	63	19,44	M	84	26,58	C	58	0,58	A	26	26,0	M	90	59,31	A	70	70,0	A	38
Marker97970	111.99	Cma_Chr04	9785002	G	T	T	21	0,21	G	17	16,1	K	28	14,14	K	13	5,8	T	57	0,57	T	25	1,24	T	79	0,79	K	55	27,28	K	63	19,44	K	84	26,58	T	58	0,58	G	26	26,0	K	90	59,31	G	70	70,0	G	38
Marker97969	111.99	Cma_Chr04	9784850	A	T	T	25	1,24	A	15	15,0	W	28	14,14	W	13	5,8	T	57	0,57	T	25	1,24	T	79	0,79	W	55	27,28	W	63	19,44	W	84	26,58	T	58	0,58	A	26	26,0	W	90	59,31	A	70	70,0	A	37
Marker97968	111.99	Cma_Chr04	9784791	A	T	T	20	0,20	A	14	14,0	W	28	14,14	W	13	5,8	T	57	0,57	T	25	1,24	T	79	0,79	W	55	27,28	W	63	19,44	W	84	26,58	T	58	0,58	A	26	26,0	W	90	59,31	A	70	70,0	A	37
Marker98028	111.99	Cma_Chr04	9794718	G	A	A	17	1,16	G	15	15,0	R	30	13,17	R	13	2,11	A	52	1,51	A	23	0,23	A	43	0,43	R	28	19,9	R	30	10,20	R	27	12,15	A	47	0,47	G	12	12,0	R	45	16,29	G	37	37,0	G	28
Marker97996	111.99	Cma_Chr04	9788848	A	C	C	15	0,15	A	19	19,0	M	7	6,1	M	7	4,3	C	13	0,13	C	10	0,10	C	12	0,12	M	5	4,1	M	21	6,15	M	10	8,2	M	16	2,14	A	6	6,0	M	17	4,13	A	22	22,0	A	18
Marker97995	111.99	Cma_Chr04	9788827	T	C	C	18	0,18	T	14	14,0	Y	7	6,1	Y	7	4,3	C	13	0,13	C	10	0,10	C	11	0,11	Y	5	4,1	Y	21	6,15	Y	10	8,2	Y	16	2,14	T	6	6,0	Y	17	4,13	T	22	22,0	T	18
Marker97937	111.99	Cma_Chr04	9782744	G	A	A	14	0,14	G	13	13,0	G	12	12,0	R	9	3,6	A	16	0,16	A	16	0,16	A	30	1,29	R	28	8,20	R	26	20,6	R	86	71,15	A	11	0,11	G	10	10,0	R	18	9,9	G	18	18,0	G	12
Marker103309	111.99	Cma_Chr04	10631503	G	A	A	27	2,25	G	21	21,0	R	15	5,10	R	15	5,10	A	100	0,100	A	26	0,26	A	74	0,74	R	34	20,14	R	29	9,20	R	10	1,9	A	42	0,42	G	25	24,1	R	76	28,48	G	43	43,0	G	36
Marker99769	111.99	Cma_Chr04	10186941	G	A	G	15	14,1	A	14	0,14	R	13	9,4	R	5	3,2	G	16	16,0	G	7	7,0	G	20	20,0	R	10	6,4	R	10	7,3	R	15	10,5	G	12	12,0	R	11	1,10	R	26	17,9	A	25	0,25	A	13
Marker104873	112.99	Cma_Chr04	11132716	T	A	A	12	0,12	T	21	21,0	W	6	5,1	W	19	10,9	W	20	2,18	A	6	0,6	A	20	0,20	W	18	14,4	W	10	7,3	W	18	10,8	A	10	0,10	T	17	17,0	W	16	4,12	T	19	19,0	W	17
Marker103308	112.99	Cma_Chr04	10631450	G	A	A	25	1,24	G	20	20,0	R	15	5,10	R	15	5,10	A	100	0,100	A	26	0,26	A	74	0,74	R	34	20,14	R	30	9,21	R	10	1,9	A	42	0,42	G	25	24,1	R	76	28,48	G	43	43,0	G	34
Marker104112	112.99	Cma_Chr04	10738552	T	G	G	10	0,10	T	23	23,0	K	7	6,1	K	5	2,3	G	9	0,9	G	7	0,7	G	11	0,11	K	10	4,6	K	7	5,2	K	14	8,6	G	6	0,6	N	.	.	K	16	10,6	T	15	15,0	T	1
Marker103561	112.99	Cma_Chr04	10661954	G	A	A	13	0,13	G	22	21,1	R	15	6,9	R	17	7,10	R	7	2,5	A	15	0,15	A	17	0,17	R	11	8,3	R	28	20,8	R	73	44,29	A	36	1,35	G	27	26,1	R	16	11,5	G	8	8,0	G	5
Marker103065	112.99	Cma_Chr04	10612771	G	T	T	14	0,14	G	12	12,0	K	20	7,13	K	20	6,14	T	62	0,62	T	46	0,46	T	76	0,76	K	46	28,18	K	98	40,58	K	33	16,17	T	71	0,71	G	22	21,1	K	91	46,45	G	65	65,0	G	47
Marker102666	112.99	Cma_Chr04	10579875	G	C	C	10	0,10	G	10	10,0	S	9	1,8	S	7	3,4	C	13	0,11	C	5	0,5	C	14	0,14	S	12	4,8	S	19	6,13	S	17	8,9	C	11	0,11	G	15	15,0	S	30	18,12	G	25	25,0	G	10
Marker102460	112.99	Cma_Chr04	10552112	C	T	T	16	1,15	C	14	14,0	Y	19	15,3	Y	8	5,3	T	35	0,35	T	34	0,34	T	46	0,46	Y	30	24,6	Y	33	12,21	Y	56	36,19	T	34	1,33	C	22	22,0	Y	21	11,10	C	37	37,0	C	23
Marker102459	112.99	Cma_Chr04	10551866	T	C	C	20	1,19	T	16	16,0	Y	19	15,4	Y	8	5,3	C	35	0,34	C	35	0,35	C	46	0,46	Y	30	24,6	Y	33	12,21	Y	56	37,19	C	34	1,33	T	22	22,0	Y	21	11,10	T	37	37,0	T	22
Marker103637	112.99	Cma_Chr04	10668324	A	G	G	19	0,19	A	19	19,0	R	5	3,2	G	4	0,4	G	25	0,25	G	8	0,8	G	28	0,28	R	11	2,9	R	24	8,16	R	16	10,6	G	18	0,18	A	10	10,0	R	18	7,11	A	7	7,0	A	5
Marker100471	112.99	Cma_Chr04	10315111	G	A	A	20	0,20	G	19	19,0	R	15	7,8	R	4	1,3	A	5	0,5	A	4	0,4	A	9	0,9	R	11	5,6	R	11	5,6	R	31	9,22	A	8	0,8	G	6	6,0	R	7	6,1	G	10	10,0	G	9
Marker100470	112.99	Cma_Chr04	10315092	A	G	G	21	0,21	A	20	20,0	R	15	7,8	R	4	1,3	G	5	0,5	G	4	0,4	G	9	0,9	R	11	5,6	R	11	5,6	R	31	9,22	G	8	0,8	A	6	6,0	R	7	6,1	A	10	10,0	A	9
Marker100469	112.99	Cma_Chr04	10315051	A	G	G	20	0,20	A	16	16,0	R	15	7,8	R	4	1,3	G	5	0,5	G	4	0,4	G	9	0,9	R	11	5,6	R	11	5,6	R	31	9,22	G	8	0,8	A	6	6,0	R	7	6,1	A	10	10,0	A	9
Marker100475	112.99	Cma_Chr04	10315341	C	T	T	19	0,19	C	22	22,0	Y	15	7,8	Y	4	1,3	T	5	0,5	T	5	0,5	T	9	0,9	Y	11	5,6	Y	11	5,6	Y	31	9,22	T	8	0,8	C	6	6,0	Y	7	6,1	C	10	10,0	C	9
Marker100474	112.99	Cma_Chr04	10315309	T	G	G	17	0,17	T	32	32,0	K	15	7,8	K	4	1,3	G	5	0,5	G	5	0,5	G	9	0,9	K	11	5,6	K	11	5,6	K	31	9,22	G	8	0,8	T	6	6,0	K	7	6,1	T	10	10,0	T	9
Marker100473	112.99	Cma_Chr04	10315291	A	G	G	17	0,17	A	28	28,0	R	15	7,8	R	4	1,3	G	5	0,5	G	5	0,5	G	9	0,9	R	11	5,6	R	11	5,6	R	31	9,22	G	8	0,8	A	6	6,0	R	7	6,1	A	10	10,0	A	9
Marker100795	112.99	Cma_Chr04	10339902	A	G	G	20	0,20	A	16	16,0	R	20	5,15	R	17	8,9	G	42	0,42	G	7	0,7	G	24	0,24	R	15	9,6	R	28	14,14	R	57	28,28	G	29	0,29	A	26	25,1	R	33	8,25	A	9	9,0	A	15
Marker99904	112.99	Cma_Chr04	10259750	A	G	A	16	15,1	G	24	0,24	R	7	2,5	R	8	4,4	A	18	18,0	A	9	9,0	A	20	20,0	R	10	4,6	R	29	13,16	R	19	8,11	A	54	54,0	G	13	0,13	R	26	13,13	G	36	0,36	R	14
Marker105623	113.49	Cma_Chr04	11835896	G	A	A	11	0,11	G	15	15,0	R	37	20,17	R	40	22,18	A	111	0,111	A	100	4,96	A	122	0,122	R	81	36,45	R	71	37,34	R	29	14,15	A	69	1,68	G	65	65,0	R	116	34,82	G	136	136,0	G	49
Marker100004	113.49	Cma_Chr04	10271309	C	T	C	15	15,0	T	21	0,21	Y	9	4,4	Y	5	4,1	C	20	20,0	C	8	8,0	C	26	26,0	Y	11	5,6	Y	19	9,10	N	.	.	C	26	26,0	T	16	0,16	Y	40	29,11	T	21	0,21	T	16
Marker103324	113.49	Cma_Chr04	10639280	T	A	A	19	1,18	T	11	10,1	W	5	4,1	A	4	0,4	A	4	0,4	A	6	0,6	A	12	0,11	W	16	12,4	W	14	10,4	W	20	12,8	A	9	0,9	T	12	12,0	W	12	4,8	T	13	13,0	T	17
Marker102898	113.49	Cma_Chr04	10602325	C	G	G	13	0,13	C	11	11,0	S	14	7,7	S	17	11,6	G	25	0,25	G	15	0,15	G	19	0,19	S	12	9,3	S	25	15,10	S	21	11,10	G	26	0,26	C	8	8,0	S	13	8,5	C	23	23,0	C	20
Marker102897	113.49	Cma_Chr04	10602280	C	T	T	15	1,14	C	16	16,0	Y	14	7,7	Y	17	11,6	T	25	0,25	T	15	0,15	T	20	0,20	Y	12	9,3	Y	25	15,10	Y	21	11,10	T	26	0,26	C	8	8,0	Y	13	8,5	C	23	23,0	C	20
Marker107773	113.49	Cma_Chr04	12176561	G	A	A	13	0,13	G	16	16,0	R	10	2,8	R	16	12,4	A	4	0,4	A	8	0,8	A	39	1,38	R	7	3,4	R	39	23,16	R	25	19,6	A	7	0,7	G	8	8,0	R	18	11,7	G	47	47,0	G	18
Marker107772	113.49	Cma_Chr04	12176528	A	C	C	13	0,13	A	15	15,0	M	10	2,8	M	16	12,4	C	4	0,4	C	8	0,8	C	39	1,38	M	7	3,4	M	39	23,16	M	25	19,6	C	7	0,7	A	8	8,0	M	18	11,7	A	47	47,0	A	18
Marker103663	113.49	Cma_Chr04	10669933	C	G	G	20	0,20	C	21	21,0	S	11	8,3	S	7	3,4	G	10	0,10	G	6	0,6	G	22	0,22	S	9	5,4	C	9	9,0	S	35	19,16	G	6	0,6	C	6	6,0	S	7	3,4	C	8	8,0	C	10
Marker103662	113.49	Cma_Chr04	10669917	G	A	A	22	0,22	G	22	22,0	R	11	8,3	R	7	3,4	A	10	0,10	A	6	0,6	A	22	0,22	R	9	5,4	G	9	9,0	R	35	19,16	A	6	0,6	G	6	6,0	R	7	3,4	G	8	8,0	G	10
Marker99579	113.49	Cma_Chr04	10169199	T	C	T	22	22,0	C	19	0,19	Y	9	2,7	Y	18	8,10	T	33	33,0	T	20	20,0	T	49	49,0	Y	22	9,13	Y	33	14,19	Y	52	18,34	T	39	38,1	C	26	0,26	Y	28	13,15	C	24	1,23	C	15
Marker99578	113.49	Cma_Chr04	10169192	A	G	A	22	22,0	G	18	0,18	R	9	2,7	R	18	8,10	A	33	33,0	A	20	20,0	A	49	49,0	R	22	9,13	R	33	14,19	R	52	18,34	A	39	38,1	G	26	0,26	R	28	13,15	G	24	1,23	G	15
Marker99577	113.49	Cma_Chr04	10169178	C	T	C	21	21,0	T	16	0,16	Y	9	2,7	Y	18	8,10	C	33	33,0	C	20	20,0	C	49	49,0	Y	23	9,14	Y	33	14,19	Y	52	18,34	C	39	38,1	T	26	0,26	Y	29	13,16	T	24	1,23	T	16
Marker98626	113.49	Cma_Chr04	9967541	G	T	T	20	0,20	G	25	25,0	K	19	4,15	K	9	4,5	T	12	0,12	T	19	0,19	T	15	0,15	T	16	0,16	K	52	14,38	K	12	4,8	T	28	0,28	G	9	9,0	K	40	17,23	G	40	40,0	G	17
Marker102885	113.49	Cma_Chr04	10601425	T	C	C	19	1,18	T	12	12,0	Y	15	8,7	Y	17	4,13	C	47	0,47	C	19	0,19	C	52	0,52	Y	37	22,15	Y	36	17,19	Y	44	28,16	C	39	1,38	T	20	19,0	Y	55	27,28	T	39	39,0	T	26
Marker102886	113.49	Cma_Chr04	10601479	C	T	T	16	1,15	C	10	10,0	Y	13	8,5	Y	17	4,13	T	47	0,47	T	19	0,19	T	52	0,52	Y	37	22,15	Y	36	17,19	Y	44	28,16	T	39	1,38	C	20	20,0	Y	55	27,28	C	39	39,0	C	26
Marker102884	113.49	Cma_Chr04	10601415	A	C	C	18	1,17	A	14	14,0	M	15	8,7	M	17	4,13	C	47	0,47	C	19	0,19	C	52	0,52	M	38	23,15	M	36	17,19	M	44	28,16	C	39	1,38	A	20	20,0	M	55	27,28	A	39	39,0	A	26
Marker100140	113.49	Cma_Chr04	10285245	G	A	G	16	16,0	A	19	0,19	R	17	8,9	R	20	14,6	G	39	38,1	G	14	14,0	G	18	18,0	G	9	9,0	R	15	8,7	R	21	16,5	G	17	17,0	A	19	0,19	R	20	13,7	A	31	0,31	A	15
Marker102346	113.49	Cma_Chr04	10537164	G	A	A	19	1,18	G	14	14,0	R	12	3,9	R	7	2,5	A	35	0,35	R	7	1,6	A	30	0,30	R	20	7,13	R	28	18,10	R	21	10,11	A	41	0,41	G	10	10,0	R	33	11,22	G	22	22,0	G	13
Marker100380	113.49	Cma_Chr04	10305931	T	C	T	36	34,2	C	16	0,16	Y	18	8,10	Y	8	7,1	T	11	11,0	T	12	12,0	T	13	13,0	Y	9	5,4	Y	13	10,3	Y	30	15,14	T	19	19,0	C	1	0,1	C	1	0,1	C	5	0,5	C	11
Marker100684	113.49	Cma_Chr04	10333359	C	T	T	16	1,15	C	18	18,0	Y	12	6,6	T	7	0,7	T	13	0,12	Y	3	1,2	T	13	0,13	Y	7	3,4	Y	25	17,8	Y	40	16,24	T	14	1,13	Y	5	3,2	Y	11	2,9	C	15	15,0	C	5
Marker100682	113.49	Cma_Chr04	10333327	T	C	C	16	1,15	T	14	14,0	Y	12	6,6	C	7	0,7	C	13	0,13	Y	3	1,2	C	13	0,13	Y	7	3,4	Y	25	17,8	Y	40	16,24	C	14	0,14	Y	5	3,2	Y	11	2,9	T	15	15,0	T	5
Marker100681	113.49	Cma_Chr04	10333311	T	C	C	16	1,15	T	16	16,0	Y	12	6,6	C	7	0,7	C	13	0,13	Y	3	1,2	C	13	0,13	Y	7	3,4	Y	25	17,8	Y	40	16,24	C	14	0,14	Y	5	3,2	Y	11	2,9	T	15	15,0	T	5
Marker100680	113.49	Cma_Chr04	10333303	A	G	G	17	1,16	A	16	16,0	R	12	6,6	G	7	0,7	G	13	0,13	R	3	1,2	G	13	0,13	R	7	3,4	R	25	17,8	R	40	16,24	G	14	0,14	R	5	3,2	R	11	2,9	A	15	15,0	A	5
Marker101378	113.49	Cma_Chr04	10424968	C	A	A	17	1,16	C	12	12,0	M	17	3,14	C	5	5,0	A	11	0,11	A	13	0,13	A	17	0,17	M	6	5,1	M	15	13,2	M	15	6,9	A	12	0,12	C	4	4,0	M	7	3,4	C	9	9,0	M	12
Marker101960	113.49	Cma_Chr04	10488935	C	T	T	18	1,17	C	17	17,0	Y	20	14,6	Y	13	2,11	T	11	0,11	T	9	0,9	T	20	0,20	Y	20	9,11	Y	28	13,15	Y	33	17,16	T	22	0,22	C	13	13,0	Y	11	4,7	C	5	5,0	C	8
Marker102169	113.49	Cma_Chr04	10511023	A	G	G	18	0,18	A	22	22,0	R	19	7,12	R	11	5,6	G	17	0,17	G	20	0,20	G	22	0,22	R	13	2,11	R	15	9,6	R	39	17,22	G	23	0,23	A	2	2,0	R	11	4,7	A	4	4,0	A	7
Marker102393	113.49	Cma_Chr04	10542619	C	T	T	20	1,19	C	14	14,0	Y	20	10,10	Y	16	10,6	T	21	0,21	T	20	1,19	T	24	1,23	Y	17	3,14	Y	28	15,13	Y	39	12,27	T	34	0,34	C	17	17,0	Y	16	10,6	C	9	9,0	C	11
Marker101258	113.49	Cma_Chr04	10387703	T	C	C	20	1,19	T	15	15,0	Y	7	4,3	Y	19	12,7	C	10	0,10	C	8	0,8	C	8	0,8	Y	10	5,5	Y	22	7,15	Y	30	18,12	C	10	0,10	T	10	10,0	Y	12	8,4	T	20	20,0	T	14
Marker101256	113.49	Cma_Chr04	10387551	G	A	A	26	1,25	G	12	12,0	R	7	4,3	R	19	12,7	A	10	0,10	A	8	0,8	A	10	0,10	R	10	5,5	R	22	7,15	R	30	18,12	A	9	0,9	G	9	9,0	R	12	8,4	G	20	20,0	G	14
Marker101255	113.49	Cma_Chr04	10387510	C	T	T	25	1,24	C	18	18,0	Y	7	4,3	Y	19	12,7	T	10	0,10	T	8	0,8	T	10	0,10	Y	10	5,5	Y	22	7,15	Y	30	18,12	T	10	0,10	C	9	9,0	Y	12	8,4	C	20	20,0	C	14
Marker101805	113.49	Cma_Chr04	10474956	T	C	C	15	0,15	T	17	17,0	Y	23	9,14	Y	15	4,11	C	28	0,28	C	22	0,22	C	37	0,37	Y	21	14,7	Y	48	27,21	Y	19	8,11	C	56	0,56	T	19	19,0	Y	32	19,13	T	14	14,0	T	22
Marker101804	113.49	Cma_Chr04	10474945	T	C	C	16	0,16	T	16	16,0	Y	23	9,14	Y	15	4,11	C	28	0,28	C	23	0,23	C	38	0,38	Y	22	14,8	Y	48	27,21	Y	20	8,12	C	58	1,57	T	19	19,0	Y	32	19,13	T	14	14,0	T	22
Marker101803	113.49	Cma_Chr04	10474890	G	A	A	16	0,16	G	21	21,0	R	23	9,14	R	15	4,11	A	28	0,28	A	22	0,22	A	38	0,38	R	22	14,8	R	48	27,21	R	20	8,12	A	57	1,56	G	19	19,0	R	32	19,13	G	14	14,0	G	22
Marker101802	113.49	Cma_Chr04	10474881	G	A	A	15	0,15	G	22	22,0	R	23	9,14	R	15	4,11	A	28	0,28	A	22	0,22	A	38	0,38	R	22	14,8	R	48	27,21	R	20	8,12	A	57	1,56	G	19	19,0	R	32	19,13	G	14	14,0	G	22
Marker104724	113.49	Cma_Chr04	10955858	C	A	A	20	0,20	C	20	20,0	M	8	4,4	M	12	6,6	A	9	0,9	A	20	0,20	A	17	0,17	M	5	2,3	M	17	6,11	M	12	9,3	A	11	0,11	C	1	1,0	M	7	1,6	M	12	11,1	C	6
Marker104114	113.49	Cma_Chr04	10738952	T	C	C	20	1,19	T	23	22,1	Y	22	5,17	Y	16	5,11	C	37	0,37	C	33	0,33	C	39	0,39	Y	25	10,15	Y	42	21,21	Y	23	11,12	C	49	0,49	T	18	18,0	Y	57	31,26	T	28	28,0	T	22
Marker104565	113.49	Cma_Chr04	10778123	T	C	C	13	0,13	T	17	17,0	Y	30	20,10	Y	15	5,10	C	39	1,38	C	24	0,24	C	54	0,54	Y	23	10,13	Y	34	24,10	Y	51	28,23	C	30	0,30	T	17	17,0	Y	26	5,21	T	21	21,0	T	15
Marker104564	113.49	Cma_Chr04	10778115	T	A	A	13	0,13	T	19	19,0	W	30	20,10	W	15	5,10	A	39	1,38	A	24	0,24	A	54	0,54	W	23	10,13	W	34	24,10	W	51	28,23	A	30	0,30	T	17	17,0	W	26	5,21	T	21	21,0	T	15
Marker104846	113.49	Cma_Chr04	11040211	C	A	A	15	0,15	C	15	15,0	M	46	25,21	M	37	16,21	A	83	0,83	A	76	0,76	A	83	0,83	M	59	37,22	M	82	49,33	M	91	34,56	A	63	0,63	C	55	52,3	M	59	34,25	C	70	68,2	C	46
Marker104652	113.49	Cma_Chr04	10814187	A	G	G	18	0,18	A	13	13,0	R	11	5,6	R	40	23,17	G	23	0,23	G	13	0,13	G	46	0,46	R	18	6,12	R	40	16,24	R	40	25,15	G	47	0,47	A	25	25,0	R	12	7,5	A	19	18,1	A	16
Marker104717	113.49	Cma_Chr04	10928420	T	G	G	17	1,16	T	14	14,0	K	36	20,16	K	13	1,12	G	9	0,9	G	25	0,25	G	17	0,17	K	20	11,9	K	44	29,15	K	9	5,4	G	18	1,17	T	15	14,1	K	22	8,14	T	54	54,0	T	30
Marker101341	113.49	Cma_Chr04	10418301	C	T	T	20	0,20	C	23	23,0	Y	12	5,7	T	7	0,7	T	26	0,26	Y	7	1,6	T	24	0,24	Y	11	4,7	Y	20	14,6	T	4	0,4	T	19	0,19	C	7	7,0	Y	15	6,9	C	15	15,0	C	3
Marker101450	113.49	Cma_Chr04	10434592	T	C	C	18	0,18	T	19	19,0	Y	16	13,3	Y	5	4,1	C	17	0,17	C	2	0,2	C	13	0,13	Y	12	5,7	Y	14	4,10	Y	20	10,10	C	17	0,17	T	3	3,0	Y	14	4,10	T	22	21,1	T	7
Marker101282	113.49	Cma_Chr04	10398163	T	C	C	15	0,15	T	13	13,0	Y	18	5,13	Y	6	1,5	C	36	0,36	Y	14	2,12	C	29	0,29	Y	16	12,4	Y	29	18,11	Y	14	4,10	C	26	0,26	T	15	14,1	Y	18	8,10	T	25	25,0	T	25
Marker101350	113.49	Cma_Chr04	10421569	C	G	G	10	0,10	C	17	17,0	S	18	10,8	S	16	8,8	G	39	0,39	S	13	3,10	G	44	0,44	S	19	12,7	S	64	42,22	S	26	18,8	G	37	1,36	C	29	27,2	S	32	16,16	C	65	65,0	C	20
Marker101349	113.49	Cma_Chr04	10421261	C	T	T	15	0,15	C	18	18,0	Y	18	10,8	Y	17	8,9	T	39	0,39	Y	13	3,10	T	44	0,44	Y	19	12,7	Y	64	42,22	Y	26	18,8	T	37	1,36	C	29	27,2	Y	32	16,16	C	66	66,0	C	19
Marker100935	113.49	Cma_Chr04	10353321	T	C	C	16	0,16	T	19	19,0	Y	40	21,19	Y	31	16,15	C	78	3,75	Y	25	2,23	C	64	1,63	Y	52	38,14	Y	88	55,33	Y	66	34,32	C	52	0,52	Y	64	59,5	Y	93	54,39	T	105	104,1	T	70
Marker100934	113.49	Cma_Chr04	10353292	G	A	A	16	0,16	G	19	19,0	R	40	21,19	R	31	16,15	A	78	3,75	R	25	2,23	A	64	1,63	R	52	38,14	R	88	55,33	R	66	34,32	A	52	0,52	R	64	59,5	R	93	54,38	G	105	105,0	G	70
Marker100932	113.49	Cma_Chr04	10353085	T	C	C	16	0,16	T	19	19,0	Y	40	21,18	Y	31	16,15	C	79	5,74	Y	25	2,23	C	64	1,63	Y	52	38,14	Y	88	55,33	Y	66	34,32	C	52	0,52	Y	64	59,5	Y	93	54,39	T	105	104,1	T	70
Marker103869	113.49	Cma_Chr04	10709374	A	T	T	14	0,14	A	19	19,0	W	23	16,7	W	51	25,26	T	54	0,54	T	24	0,24	T	75	1,74	W	41	21,20	W	83	45,38	W	40	13,27	T	66	2,64	A	39	37,2	W	93	35,58	A	69	68,1	W	45
Marker103656	113.49	Cma_Chr04	10669494	T	C	C	15	0,15	T	10	10,0	Y	24	12,12	Y	21	8,13	C	75	0,75	C	33	0,33	C	57	0,57	Y	32	11,21	Y	69	33,36	Y	46	20,26	C	38	0,38	T	28	28,0	Y	55	34,21	T	48	48,0	T	43
Marker103655	113.49	Cma_Chr04	10669426	T	C	C	16	0,16	T	12	12,0	Y	19	9,10	Y	16	5,11	C	72	0,72	C	31	0,31	C	51	0,51	Y	32	11,21	Y	68	33,35	Y	43	19,24	C	34	0,34	T	25	25,0	Y	50	31,19	T	48	48,0	T	43
Marker102263	113.49	Cma_Chr04	10523953	G	T	T	11	0,11	G	22	22,0	K	27	8,19	K	17	9,8	T	48	0,48	T	16	0,16	T	57	0,57	K	20	6,14	K	30	4,26	K	36	19,17	T	23	0,23	G	13	13,0	K	17	3,14	G	21	21,0	G	19
Marker101339	113.49	Cma_Chr04	10417954	G	A	A	19	1,18	G	15	15,0	R	40	24,16	R	41	21,20	A	45	1,44	A	27	0,27	A	58	0,58	R	30	17,13	R	78	40,38	R	36	17,19	A	56	0,56	G	52	52,0	R	82	40,42	G	51	51,0	G	31
Marker101046	113.49	Cma_Chr04	10365848	A	G	G	14	0,14	A	14	14,0	R	35	20,15	R	28	13,15	G	86	2,84	G	36	0,36	G	104	1,103	R	54	39,15	R	74	48,25	R	37	19,18	G	66	0,65	A	50	50,0	R	83	38,45	A	86	86,0	A	66
Marker101044	113.49	Cma_Chr04	10365656	G	A	A	18	0,18	G	17	17,0	R	35	20,15	R	28	13,15	A	85	2,83	A	36	0,36	A	106	1,105	R	54	39,15	R	74	49,25	R	37	19,18	A	66	0,66	G	49	49,0	R	81	38,43	G	86	86,0	G	64
Marker100217	113.49	Cma_Chr04	10293645	G	C	G	22	22,0	C	11	0,11	S	20	6,14	S	28	3,25	G	42	42,0	G	17	17,0	G	33	32,1	S	37	10,27	S	65	18,47	S	33	14,19	G	26	26,0	C	41	1,40	S	36	18,18	C	53	0,53	C	22
Marker102262	113.49	Cma_Chr04	10523827	T	C	C	12	0,12	T	21	21,0	Y	7	3,4	Y	3	2,1	C	39	0,39	C	8	0,8	C	24	0,24	Y	20	10,10	Y	59	29,30	Y	23	12,11	C	41	2,39	T	16	16,0	Y	41	13,28	T	38	38,0	T	43
Marker102260	113.49	Cma_Chr04	10523621	G	A	A	10	0,10	G	18	18,0	R	6	2,4	R	3	2,1	A	38	0,38	A	8	0,8	A	24	0,24	R	20	10,10	R	59	29,30	R	23	12,11	A	41	2,39	G	16	16,0	R	41	13,28	G	38	38,0	G	46
Marker102457	113.49	Cma_Chr04	10551528	A	T	T	19	0,19	A	26	26,0	W	18	13,5	T	17	1,16	T	24	0,24	T	14	0,14	T	22	0,22	W	16	7,9	W	41	24,17	W	26	12,14	T	16	1,15	A	12	12,0	W	14	10,4	A	12	12,0	A	15
Marker102456	113.49	Cma_Chr04	10551504	G	A	A	17	0,17	G	26	26,0	R	18	13,5	A	14	1,13	A	17	0,17	A	12	0,12	A	21	0,21	R	16	7,9	R	39	23,16	R	25	12,13	A	16	1,15	G	12	12,0	R	13	10,3	G	12	12,0	G	15
Marker103907	113.49	Cma_Chr04	10712659	C	T	T	20	0,20	C	29	29,0	Y	5	2,3	Y	7	1,6	Y	7	1,6	T	18	0,18	T	31	0,31	Y	10	7,3	Y	22	13,9	Y	4	2,2	T	18	1,17	Y	16	14,2	Y	24	11,13	C	4	4,0	C	10
Marker103325	113.49	Cma_Chr04	10639315	A	G	G	19	1,18	A	18	18,0	R	5	4,1	G	4	0,4	G	4	0,4	G	7	0,7	G	12	0,12	R	16	11,4	R	14	10,4	R	20	12,8	G	9	0,9	A	12	12,0	R	12	4,8	A	13	13,0	A	17
Marker105404	113.99	Cma_Chr04	11602321	T	C	C	14	0,14	T	17	17,0	Y	28	16,12	Y	21	15,6	C	45	1,44	C	34	0,34	C	36	0,36	Y	34	9,25	Y	69	35,34	Y	27	13,14	C	24	0,22	Y	28	24,4	Y	29	12,17	T	55	55,0	T	34
Marker104349	113.99	Cma_Chr04	10764359	G	A	A	15	0,15	G	15	15,0	R	17	14,3	R	26	6,20	A	33	1,32	A	34	2,31	A	33	0,33	R	15	10,5	R	33	21,12	R	37	28,9	A	28	0,28	G	20	20,0	R	32	17,15	G	30	30,0	G	35
Marker104024	113.99	Cma_Chr04	10723230	G	A	A	14	0,14	G	16	16,0	R	14	6,8	R	12	5,6	A	20	0,20	A	5	0,5	A	23	0,23	R	6	4,2	R	21	11,10	R	13	5,8	A	15	0,15	R	12	11,1	R	16	7,9	G	11	11,0	G	14
Marker104023	113.99	Cma_Chr04	10722994	T	G	G	17	0,17	T	19	19,0	K	14	6,8	K	12	5,7	G	20	0,20	G	5	0,5	G	23	0,23	K	6	4,2	K	21	11,10	K	13	5,8	G	15	0,15	K	12	11,1	K	16	7,9	T	11	11,0	T	14
Marker104026	113.99	Cma_Chr04	10723293	T	A	A	18	0,18	T	14	14,0	W	14	6,8	W	12	5,7	A	20	0,20	A	5	0,5	A	23	0,23	W	6	4,2	W	21	11,10	W	13	5,8	A	15	0,15	W	12	11,1	W	16	7,9	T	11	11,0	T	14
Marker100005	113.99	Cma_Chr04	10271343	G	A	G	14	14,0	A	18	0,18	R	9	5,4	R	5	4,1	G	20	20,0	G	8	8,0	G	26	26,0	R	11	6,5	R	19	9,10	N	.	.	G	26	26,0	A	16	0,16	R	40	29,11	A	21	0,21	A	16
Marker106824	114.49	Cma_Chr04	12104782	T	C	C	13	0,13	T	10	10,0	Y	10	5,5	C	1	0,1	C	5	0,5	C	6	0,6	C	11	0,11	Y	13	9,4	C	2	0,2	Y	8	2,6	C	10	0,10	Y	4	2,2	Y	19	15,4	T	15	15,0	T	6
Marker105231	114.49	Cma_Chr04	11481895	T	C	C	18	1,17	T	18	18,0	Y	23	15,8	Y	29	14,15	C	67	0,67	C	43	0,43	C	63	0,63	Y	51	24,27	Y	35	17,18	Y	43	22,21	C	39	0,39	T	30	29,1	Y	134	65,69	T	127	126,1	T	38
Marker104654	114.49	Cma_Chr04	10817819	C	T	C	24	23,1	T	15	0,15	Y	28	24,4	Y	20	2,18	C	44	44,0	C	28	26,2	C	54	53,1	Y	34	21,13	Y	41	25,16	Y	40	26,14	C	46	43,3	T	31	0,31	Y	35	15,20	T	22	0,22	T	23
Marker106708	114.99	Cma_Chr04	12079892	A	T	T	18	1,17	A	16	16,0	W	9	4,5	A	10	10,0	T	12	0,12	T	8	0,7	T	9	0,8	A	2	2,0	W	2	1,1	W	5	1,4	T	26	0,26	W	9	5,4	W	15	6,9	A	8	8,0	A	11
Marker108388	115.49	Cma_Chr04	12324343	A	G	G	18	0,18	A	14	14,0	R	15	5,10	R	8	2,6	G	18	0,18	G	16	1,15	G	15	0,15	R	21	7,14	R	32	10,22	A	20	20,0	G	8	0,8	R	14	4,10	R	14	10,4	A	23	23,0	A	13
Marker106822	115.49	Cma_Chr04	12104509	G	A	A	22	1,21	G	22	22,0	R	10	5,5	A	1	0,1	A	5	0,5	A	6	0,6	A	11	0,11	R	13	9,4	A	2	0,2	R	8	2,6	A	10	0,10	R	4	2,2	R	19	15,4	G	15	15,0	G	6
Marker107769	115.49	Cma_Chr04	12176358	C	G	G	12	0,12	C	13	13,0	S	63	34,29	S	30	17,13	G	125	1,124	G	53	1,52	G	95	0,95	S	52	24,28	S	111	41,70	S	25	12,13	G	104	1,103	G	6	0,6	S	171	74,97	C	142	142,0	C	24
Marker106580	115.49	Cma_Chr04	12060362	G	A	A	12	0,12	G	19	19,0	R	9	2,7	R	17	3,14	A	38	2,36	A	34	0,34	A	47	0,47	R	32	22,10	R	46	26,20	R	29	13,16	A	34	0,34	R	38	15,23	R	43	20,23	G	71	71,0	G	37
Marker107842	115.49	Cma_Chr04	12181698	T	A	A	18	0,18	T	19	19,0	W	23	18,5	A	4	0,4	A	58	0,58	A	22	0,22	A	66	0,65	W	38	23,15	W	52	28,24	W	19	11,8	A	42	0,42	W	28	15,13	W	55	30,25	T	79	78,0	T	38
Marker105889	115.49	Cma_Chr04	11913315	T	G	G	13	0,13	T	18	18,0	K	40	20,20	K	26	13,13	G	125	0,125	G	44	0,44	G	95	4,91	K	53	14,39	K	86	44,42	K	51	47,4	G	98	0,98	K	45	35,10	K	77	28,49	T	56	56,0	T	19
Marker108290	115.99	Cma_Chr04	12312257	G	A	A	16	1,15	G	17	17,0	R	19	5,14	R	24	7,17	A	80	0,80	A	41	0,41	A	86	0,86	R	42	6,35	R	64	11,53	G	41	41,0	A	80	0,80	R	24	7,17	R	64	10,54	G	21	21,0	R	11
Marker108387	115.99	Cma_Chr04	12324269	C	T	T	21	0,21	C	18	18,0	Y	15	5,10	Y	8	2,6	T	18	0,18	T	16	1,15	T	15	0,15	Y	22	8,14	Y	32	10,22	C	20	20,0	T	8	0,8	Y	14	4,10	Y	14	10,4	C	23	23,0	C	13
Marker106153	116.49	Cma_Chr04	11947892	G	A	A	18	1,17	G	21	21,0	R	20	18,2	R	23	17,6	A	33	0,33	A	27	0,27	A	33	1,32	R	23	15,8	R	53	31,22	G	61	60,1	A	37	0,37	R	19	16,3	R	28	9,19	G	34	34,0	G	22
Marker105942	116.49	Cma_Chr04	11917435	G	A	A	14	0,14	G	17	17,0	R	17	8,9	A	3	0,3	A	26	0,26	A	24	0,24	A	15	0,15	A	4	0,4	R	48	17,31	G	3	3,0	A	21	1,20	A	21	0,21	R	20	3,17	G	21	21,0	G	14
Marker105941	116.49	Cma_Chr04	11917403	A	G	G	16	0,16	A	13	12,1	R	17	8,9	G	3	0,3	G	26	0,26	G	24	0,24	G	15	0,15	G	4	0,4	R	48	17,31	A	3	3,0	G	21	1,20	G	21	0,21	R	20	3,17	A	21	21,0	A	14
Marker105940	116.49	Cma_Chr04	11917381	T	C	C	18	0,18	T	14	14,0	Y	17	8,9	C	3	0,3	C	26	0,26	C	24	0,24	C	15	0,15	C	4	0,4	Y	48	17,31	T	3	3,0	C	21	1,20	C	21	0,21	Y	20	3,17	T	21	21,0	T	14
Marker107985	116.49	Cma_Chr04	12270978	G	A	A	18	0,18	G	14	14,0	R	12	7,5	A	2	0,2	R	3	1,2	A	10	0,10	A	6	0,6	R	10	2,8	R	15	10,5	G	21	21,0	A	11	0,11	R	4	2,2	R	6	2,4	G	2	2,0	G	4
Marker107987	116.49	Cma_Chr04	12275408	A	G	G	14	0,14	A	19	19,0	R	10	8,2	R	14	2,12	G	26	0,26	G	13	0,13	G	6	0,6	R	24	7,17	R	16	9,7	A	6	6,0	G	17	0,17	R	14	9,5	R	29	10,19	A	26	26,0	A	11
Marker107986	116.49	Cma_Chr04	12275368	C	A	A	18	1,17	C	19	19,0	M	10	8,2	M	14	2,12	A	26	0,26	A	13	0,13	A	6	0,6	M	24	7,17	M	16	9,7	C	6	6,0	A	17	0,17	M	14	9,5	M	29	10,19	C	26	26,0	C	11
Marker108113	116.49	Cma_Chr04	12300975	T	C	C	17	0,17	T	19	19,0	Y	10	2,8	N	.	.	C	9	0,9	C	9	0,9	C	17	0,17	Y	11	5,6	Y	7	5,2	T	5	5,0	C	10	0,10	Y	15	10,5	Y	22	10,12	T	14	14,0	T	7
Marker108112	116.49	Cma_Chr04	12300932	T	C	C	17	0,17	T	17	17,0	Y	10	2,8	N	.	.	C	9	0,9	C	9	0,9	C	17	0,17	Y	11	5,6	Y	7	5,2	T	5	5,0	C	10	0,10	Y	15	10,5	Y	21	10,11	T	14	14,0	T	7
Marker108111	116.49	Cma_Chr04	12300926	T	C	C	17	0,17	T	17	17,0	Y	10	2,8	N	.	.	C	9	0,9	C	9	0,9	C	17	0,17	Y	11	5,6	Y	7	5,2	T	5	5,0	C	10	0,10	Y	15	10,5	Y	21	10,10	T	14	14,0	T	7
Marker105764	116.49	Cma_Chr04	11901934	G	A	A	24	1,23	G	18	18,0	R	3	2,1	R	11	4,7	A	15	0,15	A	8	0,8	A	13	0,13	R	10	4,6	R	20	8,12	G	15	15,0	A	8	0,8	R	8	6,2	R	11	9,2	G	14	14,0	N	.
Marker107975	116.99	Cma_Chr04	12261453	T	C	C	15	0,15	T	16	16,0	C	8	0,8	Y	41	17,24	C	38	0,38	C	18	0,18	C	32	0,32	Y	22	9,13	Y	25	15,10	T	27	27,0	C	28	0,28	Y	21	7,14	Y	61	22,39	T	38	38,0	T	20
Marker109252	117.49	Cma_Chr04	13421475	A	G	G	18	0,18	A	23	23,0	R	24	11,13	R	2	1,1	G	10	0,10	G	6	0,6	G	13	0,13	R	11	5,6	R	14	3,11	A	17	17,0	G	9	0,9	R	5	1,4	R	17	10,7	A	9	9,0	R	10
Marker108477	117.49	Cma_Chr04	12330156	G	A	A	18	1,17	G	12	12,0	R	34	18,16	R	31	17,14	A	73	2,71	A	49	1,48	A	28	1,27	R	35	19,16	R	71	47,24	G	43	42,1	A	61	1,60	R	42	13,29	R	91	70,21	G	65	64,1	G	36
Marker108783	117.49	Cma_Chr04	12815806	A	C	C	18	1,17	A	17	17,0	M	9	5,4	M	9	8,1	M	10	2,8	C	5	0,5	C	12	0,12	M	14	9,5	M	26	14,12	A	76	76,0	C	27	0,27	M	24	13,11	A	10	10,0	A	30	29,0	M	21
Marker108708	118.991	Cma_Chr04	12635439	T	C	C	18	1,17	T	11	11,0	Y	7	3,4	Y	16	2,14	C	29	1,28	C	13	0,13	C	26	0,26	Y	30	15,15	Y	29	14,15	T	50	50,0	C	36	2,33	Y	16	5,11	Y	23	8,15	T	31	31,0	T	24
Marker107976	118.991	Cma_Chr04	12261676	T	C	C	13	0,13	T	21	21,0	C	8	0,8	Y	41	17,24	C	38	0,38	C	18	0,18	C	37	0,36	Y	22	10,12	Y	25	15,10	T	27	27,0	C	27	0,27	Y	21	7,13	Y	61	22,39	T	38	38,0	T	21
Marker110280	119.491	Cma_Chr04	13751187	C	T	T	12	1,11	C	15	15,0	Y	4	3,1	Y	15	6,9	T	53	0,53	T	15	0,15	T	30	0,30	Y	19	9,10	Y	25	9,16	C	14	14,0	Y	48	17,31	Y	17	8,9	Y	22	8,14	C	16	16,0	C	7
Marker109251	119.491	Cma_Chr04	13421449	T	C	C	16	0,16	T	24	24,0	Y	24	11,13	Y	2	1,1	C	10	0,10	C	6	0,6	C	13	0,13	Y	11	5,6	Y	14	3,11	T	17	17,0	C	9	0,9	Y	5	1,4	Y	17	10,7	T	9	9,0	Y	10
Marker109250	119.491	Cma_Chr04	13421413	T	C	C	17	0,17	T	22	22,0	Y	24	11,13	Y	2	1,1	C	10	0,10	C	6	0,6	C	13	0,13	Y	11	5,6	Y	14	3,11	T	17	17,0	C	9	0,9	Y	5	1,4	Y	17	10,7	T	9	9,0	Y	10
Marker109247	119.491	Cma_Chr04	13421234	T	C	C	19	0,19	T	18	18,0	Y	24	11,13	Y	2	1,1	C	10	0,10	C	6	0,6	C	12	0,12	Y	11	5,6	Y	14	3,11	T	18	18,0	C	9	0,9	Y	5	1,4	Y	17	10,7	T	9	9,0	Y	10
Marker108776	119.491	Cma_Chr04	12774812	C	T	T	11	0,11	C	21	21,0	Y	34	16,18	Y	30	20,10	T	89	1,88	T	61	0,61	T	121	2,118	Y	57	28,29	Y	67	32,35	C	21	21,0	T	81	1,80	Y	53	14,39	Y	81	42,39	C	122	122,0	C	58
Marker108829	119.491	Cma_Chr04	12911118	G	A	A	15	0,15	G	17	17,0	R	11	8,3	R	3	1,2	A	17	0,17	A	7	0,7	A	6	0,6	R	11	6,5	R	20	9,11	G	19	19,0	A	8	0,8	R	7	4,3	R	12	8,4	G	11	11,0	G	6
Marker109359	119.491	Cma_Chr04	13430440	C	T	T	20	1,19	C	10	10,0	Y	3	2,1	Y	22	6,16	T	52	0,52	T	21	0,21	T	48	0,48	Y	21	4,17	Y	35	8,27	C	17	17,0	T	55	0,55	Y	11	3,8	Y	53	14,39	C	18	18,0	C	14
Marker109791	119.991	Cma_Chr04	13536222	G	A	A	22	1,21	G	23	23,0	R	13	2,11	A	1	0,1	A	24	0,24	A	14	0,14	A	39	0,39	R	7	1,6	R	14	7,7	G	12	12,0	A	15	0,15	R	13	1,12	R	18	9,9	G	9	9,0	G	9
Marker109278	120.491	Cma_Chr04	13423152	G	A	A	18	0,18	G	10	10,0	R	10	4,6	A	6	0,6	A	18	0,18	A	23	0,23	A	29	0,29	R	14	8,6	R	24	6,18	G	12	12,0	A	16	0,16	R	14	3,11	R	42	24,18	G	25	25,0	G	18
Marker110180	120.491	Cma_Chr04	13604941	A	G	G	12	0,12	A	27	26,1	R	6	1,5	G	2	0,2	G	6	0,6	G	3	0,3	G	3	0,3	R	6	3,3	G	1	0,1	A	24	24,0	G	5	0,5	R	5	2,3	G	2	0,2	A	4	4,0	R	4
Marker110179	120.491	Cma_Chr04	13604914	T	C	C	12	0,12	T	25	24,1	Y	6	1,5	C	2	0,2	C	6	0,6	C	3	0,3	C	3	0,3	Y	6	3,3	C	1	0,1	T	24	24,0	C	5	0,5	Y	5	2,3	C	2	0,2	T	4	4,0	Y	4
Marker110282	120.491	Cma_Chr04	13751273	G	A	A	10	0,10	G	11	11,0	R	3	2,1	R	15	6,9	A	53	0,53	A	15	0,15	A	30	0,30	R	19	9,10	R	25	9,16	G	14	14,0	R	48	17,31	R	17	8,9	R	22	8,14	G	16	16,0	G	7
Marker110281	120.491	Cma_Chr04	13751208	T	C	C	12	0,12	T	13	12,1	Y	4	3,1	Y	15	6,9	C	53	0,53	C	15	0,15	C	30	0,30	Y	19	9,10	Y	25	9,16	T	14	14,0	Y	48	17,31	Y	17	8,9	Y	22	8,14	T	16	16,0	T	7
Marker110178	120.491	Cma_Chr04	13604759	G	T	T	10	0,10	G	16	16,0	K	6	1,5	T	2	0,2	T	4	0,4	T	3	0,3	T	3	0,3	K	6	3,3	T	1	0,1	G	24	24,0	T	4	0,4	K	5	2,3	T	2	0,2	G	4	4,0	K	4
Marker110177	120.491	Cma_Chr04	13604738	G	A	A	10	0,10	G	25	25,0	R	6	1,5	A	2	0,2	A	4	0,4	A	3	0,3	A	3	0,3	R	6	3,3	A	1	0,1	G	24	24,0	A	4	0,4	R	5	2,3	A	2	0,2	G	4	4,0	A	4
Marker109789	120.991	Cma_Chr04	13536159	C	A	A	22	0,22	C	22	22,0	M	13	2,11	A	1	0,1	A	24	0,24	A	13	0,13	A	39	0,39	M	7	1,6	M	14	7,7	C	12	12,0	A	15	0,15	M	13	1,12	M	18	9,9	C	8	8,0	C	9
Marker109279	120.991	Cma_Chr04	13423209	C	A	A	16	0,16	C	11	11,0	M	10	4,6	A	6	0,6	A	18	0,18	A	23	0,23	A	29	0,29	M	14	8,6	M	25	6,19	C	12	12,0	A	16	0,16	M	14	3,11	M	43	25,18	C	25	25,0	C	18
Marker110237	121.491	Cma_Chr04	13700176	A	G	G	21	0,21	A	15	15,0	R	22	4,18	R	23	10,13	G	29	1,27	G	14	0,14	G	14	0,14	R	29	21,8	R	35	17,18	A	46	46,0	G	50	1,49	R	19	14,5	R	36	13,23	A	30	30,0	A	10
Marker109863	121.491	Cma_Chr04	13567373	T	C	C	14	0,14	T	15	15,0	Y	15	11,4	Y	16	10,6	C	22	0,22	Y	12	2,10	C	9	0,9	T	4	4,0	Y	20	5,15	T	34	34,0	C	9	0,9	Y	8	3,5	C	7	0,7	T	10	10,0	T	9
Marker109790	121.491	Cma_Chr04	13536204	C	T	T	21	1,20	C	22	22,0	Y	13	2,11	T	1	0,1	T	24	0,23	T	14	0,14	T	39	0,39	Y	7	1,6	Y	14	7,7	C	12	12,0	T	15	0,15	Y	13	1,12	Y	18	9,9	C	9	9,0	C	9
Marker110320	121.991	Cma_Chr04	13756495	G	A	A	16	0,16	G	18	18,0	R	10	6,4	R	33	16,17	A	60	1,59	A	22	1,21	A	45	1,44	R	33	14,19	R	47	18,29	G	19	19,0	R	43	28,14	R	38	26,12	R	56	32,24	G	82	81,1	G	35
Marker109960	121.991	Cma_Chr04	13576697	G	A	A	12	0,12	G	17	17,0	R	40	30,10	R	19	11,8	A	44	0,44	A	44	0,44	A	47	0,47	R	34	17,17	R	61	27,34	G	31	31,0	A	80	0,80	R	25	21,4	R	37	16,21	G	48	48,0	G	43
Marker109866	121.991	Cma_Chr04	13567640	C	T	T	13	0,13	C	16	16,0	Y	15	11,4	Y	16	10,6	T	22	0,22	Y	12	2,10	T	9	0,9	C	4	4,0	Y	20	5,15	C	35	35,0	T	9	0,9	Y	9	3,6	T	7	0,7	C	10	10,0	C	9
Marker109575	121.991	Cma_Chr04	13517804	G	A	A	18	1,17	G	19	19,0	R	10	4,6	R	8	6,2	A	5	0,5	A	5	0,5	A	19	0,19	R	14	9,5	R	14	7,7	G	55	55,0	A	6	0,6	R	5	1,4	R	3	1,2	G	6	6,0	G	7
Marker110350	122.491	Cma_Chr04	13760714	C	T	T	23	1,22	C	19	19,0	Y	13	2,11	Y	8	6,2	T	42	0,42	T	7	0,7	T	17	1,16	Y	19	11,8	Y	29	11,18	C	51	51,0	Y	27	13,14	Y	5	3,2	Y	33	19,14	C	52	51,1	C	19
Marker110822	122.991	Cma_Chr04	14013923	G	A	A	17	1,16	G	23	23,0	R	35	20,15	R	29	18,11	A	135	0,135	A	63	0,63	A	93	0,93	R	71	40,31	R	71	42,29	G	25	25,0	R	108	58,50	R	52	30,22	R	118	63,55	G	149	149,0	G	79
Marker111185	123.491	Cma_Chr04	14083335	T	G	T	20	20,0	G	29	0,29	K	31	14,17	K	29	10,19	T	30	30,0	T	35	35,0	T	49	49,0	K	14	11,3	K	28	21,7	G	6	0,6	K	17	5,12	K	18	16,2	K	19	9,10	G	47	0,47	G	17
Marker111303	123.991	Cma_Chr04	14113927	C	T	C	21	20,1	T	16	0,16	Y	31	9,22	Y	10	4,6	C	23	23,0	Y	36	33,3	Y	32	29,3	Y	21	12,9	Y	34	11,23	T	27	0,27	Y	44	20,24	Y	19	9,10	Y	31	12,19	T	46	0,46	T	33
Marker110871	123.991	Cma_Chr04	14018112	G	A	A	18	0,18	G	20	20,0	R	16	9,7	R	21	12,9	A	60	0,60	A	16	0,16	A	40	0,40	R	25	9,16	R	37	19,18	G	17	17,0	R	19	8,11	R	25	7,17	R	37	21,16	G	32	32,0	G	20
Marker110868	123.991	Cma_Chr04	14017856	T	G	G	15	0,15	T	21	21,0	K	16	9,7	K	21	12,9	G	60	0,60	G	16	0,16	G	40	0,40	K	25	9,16	K	38	20,18	T	18	18,0	K	19	8,11	K	25	7,18	K	37	21,16	T	32	32,0	T	20
Marker110441	123.991	Cma_Chr04	13830800	A	G	A	22	21,1	G	19	0,19	R	22	16,6	R	24	12,12	A	43	43,0	A	24	23,1	A	57	56,1	R	38	20,18	R	49	29,20	G	31	0,31	R	35	15,20	R	22	17,5	R	52	30,22	G	52	0,52	G	30
Marker112004	124.491	Cma_Chr04	14386620	A	G	G	14	0,14	A	21	21,0	R	6	1,5	G	9	0,9	G	35	0,35	G	14	0,14	G	17	0,17	R	17	7,10	R	28	9,19	A	13	13,0	R	31	10,21	R	16	10,6	R	16	6,10	A	23	23,0	A	8
Marker111184	124.491	Cma_Chr04	14083302	G	T	G	21	21,0	T	25	0,25	K	31	14,17	K	29	10,19	G	30	30,0	G	35	35,0	G	49	49,0	K	14	11,3	K	28	21,7	T	6	0,6	K	17	5,12	K	18	16,2	K	19	9,10	T	46	0,46	T	17
Marker112051	124.491	Cma_Chr04	14391518	C	A	A	19	0,19	C	12	12,0	M	12	3,9	M	4	2,2	A	18	0,18	A	8	0,8	N	.	.	M	11	4,7	M	17	8,9	C	11	11,0	M	20	8,12	A	2	0,2	M	10	6,4	C	11	11,0	C	9
Marker112050	124.491	Cma_Chr04	14391454	C	T	T	21	0,21	C	17	17,0	Y	12	3,9	Y	4	2,2	T	15	0,15	T	8	0,8	N	.	.	Y	11	4,7	Y	17	8,9	C	11	11,0	Y	20	8,12	T	2	0,2	Y	10	6,4	C	11	11,0	C	9
Marker112044	124.491	Cma_Chr04	14390599	A	G	G	16	1,15	A	15	15,0	R	23	15,8	R	12	8,4	G	35	1,34	G	24	0,24	G	18	0,18	R	36	18,18	R	33	13,20	A	22	22,0	R	53	22,31	R	22	16,6	R	49	26,23	A	82	82,0	A	14
Marker110881	124.491	Cma_Chr04	14019446	C	T	T	18	0,18	C	20	20,0	Y	17	7,10	Y	2	1,1	T	15	1,14	T	19	0,19	T	22	0,22	Y	12	6,6	Y	28	19,9	C	23	23,0	Y	21	11,10	Y	17	5,12	Y	12	6,6	C	11	11,0	C	16
Marker110880	124.491	Cma_Chr04	14019421	C	G	G	15	0,15	C	21	21,0	S	17	7,10	S	2	1,1	G	15	1,14	G	19	0,18	G	22	0,22	S	12	6,6	S	28	19,9	C	23	23,0	S	21	11,10	S	17	5,11	S	12	6,6	C	11	11,0	C	16
Marker111130	124.491	Cma_Chr04	14079875	T	C	T	19	19,0	C	13	0,13	Y	18	9,9	Y	13	9,4	T	12	12,0	T	28	28,0	T	20	20,0	Y	17	9,8	Y	34	8,26	C	48	0,48	Y	25	11,14	Y	22	7,15	Y	56	33,23	C	36	0,36	C	13
Marker111090	124.491	Cma_Chr04	14061639	C	T	C	16	15,1	T	20	0,20	Y	26	7,19	Y	10	7,3	C	59	59,0	C	51	51,0	C	51	51,0	Y	53	24,29	Y	71	36,35	T	14	0,14	Y	71	25,46	Y	18	11,7	Y	69	30,39	T	47	0,47	T	28
Marker111069	124.491	Cma_Chr04	14042863	C	T	T	27	1,26	C	29	29,0	Y	23	13,10	Y	19	15,4	T	38	1,37	T	7	0,7	T	33	0,33	Y	29	11,18	Y	44	16,28	C	52	52,0	Y	26	13,13	Y	12	8,4	Y	31	16,15	C	34	34,0	C	17
Marker113411	124.991	Cma_Chr04	14631212	G	T	G	15	14,1	T	22	0,22	T	4	0,4	N	.	.	K	16	7,8	G	6	6,0	G	1	1,0	K	5	2,3	K	23	18,5	T	10	0,10	K	24	10,14	T	1	0,1	K	5	2,3	T	12	0,12	T	2
Marker111291	124.991	Cma_Chr04	14111988	A	G	A	16	15,1	G	24	0,24	R	14	6,8	R	8	3,5	A	25	25,0	A	11	11,0	A	10	10,0	R	7	4,3	R	23	8,15	G	24	0,23	R	19	6,13	R	8	4,4	R	17	10,7	G	32	0,32	G	20
Marker110999	124.991	Cma_Chr04	14031572	C	T	T	11	0,11	C	20	20,0	Y	6	3,3	Y	12	7,5	T	15	0,15	T	8	0,8	T	15	0,15	C	4	4,0	Y	16	9,7	C	16	16,0	Y	18	12,6	Y	9	8,1	Y	17	11,6	C	25	25,0	C	9
Marker111131	124.991	Cma_Chr04	14079934	G	A	G	18	18,0	A	17	0,17	R	18	9,9	R	13	9,4	G	12	12,0	G	28	28,0	G	20	20,0	R	16	9,7	R	34	8,26	A	48	0,48	R	26	12,14	R	22	7,15	R	56	33,23	A	36	0,36	A	13
Marker111053	124.991	Cma_Chr04	14041218	T	C	C	12	0,12	T	13	13,0	Y	35	21,14	Y	22	9,13	C	116	0,116	C	44	2,42	C	72	0,72	Y	61	29,32	Y	84	44,40	T	43	43,0	Y	103	40,63	Y	32	22,10	Y	92	39,53	T	103	103,0	T	49
Marker111052	124.991	Cma_Chr04	14041187	G	C	C	14	0,14	G	15	15,0	S	35	21,14	S	23	9,14	C	117	0,117	C	44	2,42	C	72	0,72	S	63	28,35	S	84	44,40	G	43	43,0	S	103	40,63	S	34	22,12	S	92	39,53	G	103	103,0	G	50
Marker110845	124.991	Cma_Chr04	14015313	T	A	A	20	1,19	T	11	11,0	W	19	14,5	W	20	11,9	A	14	0,14	A	9	0,9	A	18	0,18	W	19	12,7	W	40	19,21	T	47	47,0	W	25	14,11	A	16	1,15	W	16	10,6	T	28	28,0	T	22
Marker110842	124.991	Cma_Chr04	14015116	A	G	G	12	0,12	A	17	17,0	R	20	14,6	R	20	11,9	G	14	0,14	G	9	0,9	G	20	0,20	R	19	12,7	R	41	19,22	A	51	51,0	R	26	15,11	G	17	1,16	R	16	10,6	A	31	31,0	A	23
Marker110683	124.991	Cma_Chr04	13905649	T	C	T	20	19,1	C	17	0,17	Y	9	5,4	Y	8	5,3	T	9	9,0	T	10	10,0	T	6	6,0	Y	9	4,5	Y	25	17,8	C	44	0,44	Y	22	6,16	Y	5	4,1	Y	11	5,6	Y	8	1,7	C	9
Marker111549	124.991	Cma_Chr04	14344971	C	T	T	18	1,17	C	17	17,0	Y	10	8,2	T	2	0,2	T	14	0,14	T	13	0,13	T	4	0,4	Y	10	4,6	Y	19	6,13	C	22	22,0	Y	13	5,8	T	1	0,1	Y	12	8,4	C	19	19,0	C	3
Marker111548	124.991	Cma_Chr04	14344944	T	G	G	20	1,19	T	16	16,0	K	10	8,2	G	2	0,2	G	14	0,14	G	13	0,13	G	4	0,4	K	10	4,6	K	19	6,13	T	22	21,1	K	13	5,8	G	1	0,1	K	12	8,4	T	19	19,0	T	3
Marker111189	124.991	Cma_Chr04	14083610	T	C	T	10	10,0	C	22	0,22	Y	31	14,17	Y	29	10,19	T	30	29,1	T	34	34,0	T	49	49,0	Y	14	11,3	Y	28	21,7	C	6	0,6	Y	17	5,12	Y	18	16,2	Y	19	9,10	C	47	0,47	C	17
Marker111186	124.991	Cma_Chr04	14083367	G	C	G	17	17,0	C	28	0,28	S	31	14,17	S	29	10,19	G	30	30,0	G	35	35,0	G	49	49,0	S	14	11,3	S	28	21,7	C	6	0,6	S	17	5,12	S	18	16,2	S	19	9,10	C	47	1,46	C	17
Marker113412	125.491	Cma_Chr04	14631222	T	C	T	16	15,1	C	20	0,20	C	4	0,4	C	2	0,2	Y	16	8,8	T	6	6,0	T	1	1,0	Y	5	2,3	Y	23	18,5	C	10	0,10	Y	24	11,13	C	1	0,1	Y	5	2,3	C	12	0,12	C	2
Marker112003	125.491	Cma_Chr04	14386584	C	T	T	16	0,16	C	20	20,0	Y	6	1,5	T	9	0,9	T	35	0,35	T	14	0,14	T	17	0,16	Y	17	7,10	Y	28	9,19	C	13	13,0	Y	31	10,21	Y	16	10,6	Y	16	6,10	C	23	23,0	C	8
Marker112000	125.491	Cma_Chr04	14386431	T	C	C	15	0,15	T	18	18,0	Y	6	1,5	C	9	0,9	C	35	0,35	C	14	0,14	C	16	0,16	Y	17	7,10	Y	28	9,19	T	13	13,0	Y	31	10,20	Y	16	10,6	Y	15	5,10	T	23	23,0	T	9
Marker112678	125.491	Cma_Chr04	14461848	A	T	T	23	0,23	A	26	26,0	W	13	7,6	W	21	8,13	T	62	1,61	T	29	0,29	T	34	0,34	W	20	7,13	W	18	11,7	A	29	28,1	W	35	25,10	W	23	11,12	W	46	16,30	A	20	19,1	W	15
Marker112674	125.491	Cma_Chr04	14461607	C	T	T	24	0,24	C	17	17,0	Y	13	7,6	Y	20	6,12	T	62	0,62	T	29	0,29	T	33	0,33	Y	20	7,13	Y	18	11,7	C	29	28,1	Y	35	25,10	Y	23	11,12	Y	46	16,30	C	20	19,1	Y	15
Marker112307	125.491	Cma_Chr04	14418125	G	C	C	18	1,17	G	15	15,0	S	20	9,11	S	22	14,8	C	21	0,21	C	10	0,10	C	17	0,17	S	20	9,11	S	27	10,17	G	37	36,1	S	29	17,12	S	27	6,21	S	26	20,5	G	28	28,0	G	21
Marker111407	125.491	Cma_Chr04	14292025	G	C	C	18	0,18	G	19	19,0	S	13	8,5	S	13	8,5	S	17	2,15	C	8	0,8	C	15	0,15	S	9	7,2	S	11	2,9	G	13	13,0	S	22	12,10	S	7	1,6	S	15	2,13	G	10	10,0	G	5
Marker111552	125.491	Cma_Chr04	14345564	C	T	T	11	0,11	C	13	13,0	C	7	7,0	Y	28	26,2	T	35	0,35	T	18	1,17	T	13	0,13	Y	13	8,5	Y	26	13,13	C	31	31,0	Y	22	15,7	Y	6	3,3	Y	19	9,10	C	25	25,0	C	16
Marker111551	125.491	Cma_Chr04	14345496	C	T	C	11	11,0	T	12	0,12	T	7	0,7	Y	27	2,25	C	35	35,0	C	18	17,1	C	13	13,0	Y	12	5,7	Y	26	13,13	T	31	0,31	Y	22	7,15	Y	6	3,3	Y	19	10,9	T	25	0,25	T	16
Marker112067	125.491	Cma_Chr04	14392694	C	A	A	17	1,16	C	18	18,0	M	24	9,15	M	21	6,15	A	92	0,92	A	35	0,35	A	63	0,63	M	25	7,18	M	35	9,26	C	23	23,0	M	59	22,37	M	22	6,15	M	62	10,52	C	16	16,0	C	8
Marker113541	125.991	Cma_Chr04	14643738	C	T	C	21	20,1	T	14	0,14	Y	28	14,13	Y	25	11,14	Y	31	12,19	C	26	26,0	C	25	25,0	Y	16	8,8	Y	35	15,20	T	10	0,10	Y	23	11,12	Y	13	1,12	Y	35	7,28	T	46	0,46	T	20
Marker113543	127.491	Cma_Chr04	14643773	T	C	T	24	23,1	C	16	0,16	Y	28	15,13	Y	25	11,14	Y	31	12,19	T	23	23,0	T	25	25,0	Y	16	8,8	Y	35	15,20	C	10	0,10	Y	23	11,12	Y	13	1,12	Y	35	7,28	C	46	0,46	C	20
Marker113553	127.491	Cma_Chr04	14644702	G	A	G	19	19,0	A	22	0,22	R	8	5,3	R	7	1,6	R	13	5,8	G	8	8,0	G	17	17,0	R	4	2,2	R	26	7,19	A	17	0,17	R	20	12,8	R	5	2,3	R	21	8,13	A	6	0,6	R	26
Marker114492	127.991	Cma_Chr04	14814134	T	G	T	21	21,0	G	22	0,22	K	22	17,5	K	9	4,5	K	59	32,27	T	15	15,0	T	21	21,0	K	18	10,8	K	49	28,21	G	43	0,43	K	45	24,21	K	31	16,15	K	70	40,30	G	50	0,50	G	29
Marker113540	127.991	Cma_Chr04	14643731	G	T	G	21	20,1	T	13	0,13	K	28	15,13	K	25	11,14	K	31	12,19	G	26	26,0	G	25	25,0	K	16	8,8	K	35	15,20	T	10	0,10	K	23	13,10	K	13	1,12	K	35	7,28	T	46	0,46	T	20
Marker113908	127.991	Cma_Chr04	14695176	G	T	G	19	18,1	T	22	0,22	K	9	3,6	K	4	2,2	K	32	8,24	G	5	5,0	G	7	7,0	K	15	8,7	K	18	4,14	T	24	1,23	K	8	2,6	T	3	0,3	K	12	9,3	T	25	0,25	K	8
Marker113245	127.991	Cma_Chr04	14612273	T	C	T	21	21,0	C	18	0,18	Y	8	5,3	Y	7	3,4	Y	7	5,2	T	7	7,0	T	7	7,0	Y	9	6,3	Y	11	3,8	C	21	0,21	Y	12	5,7	T	4	4,0	Y	9	3,6	C	3	0,3	C	4
Marker113244	127.991	Cma_Chr04	14612258	T	C	T	20	20,0	C	18	0,18	Y	8	5,3	Y	7	3,4	Y	7	5,2	T	7	7,0	T	7	7,0	Y	9	6,3	Y	11	3,8	C	21	0,21	Y	12	5,7	T	4	4,0	Y	9	3,6	C	3	0,3	C	4
Marker113222	127.991	Cma_Chr04	14610831	C	T	C	18	18,0	T	23	0,23	Y	33	19,14	Y	19	6,13	Y	40	4,36	C	16	16,0	C	35	34,1	Y	19	8,11	Y	37	14,23	T	21	0,21	Y	39	12,27	Y	19	5,14	Y	38	12,26	T	43	0,43	T	34
Marker113221	127.991	Cma_Chr04	14610824	G	A	G	19	19,0	A	21	0,21	R	33	19,14	R	19	6,13	R	40	4,36	G	16	16,0	G	35	34,1	R	19	8,11	R	37	14,23	A	21	0,21	R	39	12,27	R	19	5,14	R	38	12,26	A	43	3,40	A	34
Marker113220	127.991	Cma_Chr04	14610809	G	A	G	20	20,0	A	22	0,22	R	33	19,14	R	19	6,13	R	40	4,36	G	16	16,0	G	35	34,1	R	19	8,11	R	37	14,23	A	21	0,21	R	39	12,27	R	19	5,14	R	38	12,26	A	43	0,43	A	34
Marker113852	127.991	Cma_Chr04	14684108	C	A	C	11	11,0	A	18	0,18	M	55	23,32	M	15	10,5	M	66	26,40	C	38	37,0	C	63	63,0	M	55	25,30	M	72	32,40	A	41	0,41	M	80	25,54	M	47	22,25	M	117	64,53	A	64	1,63	A	50
Marker113507	127.991	Cma_Chr04	14641513	T	A	T	20	20,0	A	26	0,26	W	34	19,15	W	26	11,15	W	60	31,29	T	25	25,0	T	44	44,0	W	29	17,12	W	61	40,18	A	39	0,38	W	30	12,18	W	20	7,13	W	37	17,20	A	50	1,49	A	21
Marker113506	127.991	Cma_Chr04	14641492	G	A	G	23	23,0	A	21	0,21	R	34	19,15	R	26	11,15	R	60	31,29	G	25	25,0	G	44	44,0	R	29	17,12	R	61	43,18	A	39	0,39	R	30	12,18	R	20	7,13	R	37	17,20	A	50	1,49	A	21
Marker113904	127.991	Cma_Chr04	14693376	A	G	A	13	13,0	G	14	0,14	R	10	3,7	R	13	10,3	R	2	1,1	A	2	2,0	A	9	9,0	R	6	4,2	R	17	14,3	G	24	1,23	R	14	4,10	R	3	2,1	R	11	9,2	G	9	0,9	G	3
Marker113927	127.991	Cma_Chr04	14699369	G	C	G	15	14,1	C	25	0,25	S	10	4,6	S	11	7,4	S	26	17,9	G	25	25,0	S	10	9,1	S	16	11,5	S	16	9,7	C	24	0,24	S	18	16,2	S	21	13,8	S	24	11,13	C	56	0,56	C	19
Marker113925	127.991	Cma_Chr04	14699158	G	A	G	15	14,1	A	18	0,18	R	11	5,6	R	11	7,4	R	26	17,9	G	25	25,0	R	10	9,1	R	16	11,5	R	16	9,7	A	22	0,22	R	18	16,2	R	21	13,8	R	24	11,13	A	57	0,57	A	19
Marker113679	127.991	Cma_Chr04	14665445	G	C	G	12	12,0	C	19	0,19	S	3	1,2	G	1	1,0	S	34	23,11	G	8	8,0	G	13	13,0	S	8	3,5	S	23	15,8	C	9	0,9	S	19	14,5	S	20	7,13	S	11	7,4	C	12	0,12	C	4
Marker113554	127.991	Cma_Chr04	14644736	G	A	G	24	23,1	A	22	0,22	R	8	5,3	R	7	1,6	R	13	5,8	G	8	8,0	G	17	17,0	R	4	2,2	R	27	8,19	A	17	0,17	R	20	12,8	R	5	2,3	R	21	8,12	A	6	0,6	R	26
Marker114624	128.491	Cma_Chr04	14876378	T	C	C	10	0,10	T	17	17,0	Y	14	3,11	Y	14	7,7	Y	37	21,16	Y	8	2,6	C	8	0,8	Y	12	10,2	Y	42	22,20	T	54	54,0	Y	41	25,16	T	12	12,0	Y	33	19,14	T	37	37,0	T	20
Marker113542	128.491	Cma_Chr04	14643756	T	C	T	21	20,1	C	12	0,12	Y	28	15,13	Y	25	11,14	Y	31	12,19	T	23	23,0	T	25	25,0	Y	16	8,8	Y	35	15,20	C	10	0,10	Y	23	11,12	Y	13	1,12	Y	35	7,28	C	46	0,46	C	20
Marker114060	128.491	Cma_Chr04	14747133	T	C	T	19	18,1	C	16	0,16	Y	40	22,18	Y	32	11,21	Y	85	45,40	T	38	37,1	T	48	48,0	Y	32	20,12	Y	36	19,17	C	23	0,23	Y	66	35,31	Y	52	31,21	Y	76	40,36	C	67	3,64	C	15
Marker114628	129.491	Cma_Chr04	14876645	T	C	C	14	0,14	T	17	17,0	Y	14	3,11	Y	14	7,7	Y	36	21,15	Y	8	2,6	C	8	0,8	Y	12	10,2	Y	42	22,20	T	53	53,0	Y	41	25,16	T	12	12,0	Y	33	19,14	T	37	37,0	T	20
Marker114054	129.491	Cma_Chr04	14745300	A	G	A	14	14,0	G	12	0,12	R	13	5,8	R	19	9,10	R	38	13,25	A	16	16,0	A	35	34,1	R	24	11,13	R	43	13,30	G	21	0,21	R	33	11,22	R	36	12,24	R	49	25,24	R	39	3,36	G	22
Marker115007	130.492	Cma_Chr04	14992871	C	T	T	19	0,19	C	21	21,0	Y	18	10,8	Y	13	5,8	Y	41	31,10	T	23	0,23	C	34	32,2	Y	16	9,7	Y	29	19,10	C	74	74,0	Y	32	24,8	Y	14	12,2	Y	42	30,12	C	18	18,0	C	19
Marker114494	130.492	Cma_Chr04	14814181	C	A	C	18	18,0	A	17	0,17	M	22	17,5	M	9	4,5	M	59	32,27	C	15	15,0	C	21	21,0	M	18	10,8	M	49	28,21	A	44	1,43	M	46	24,22	M	31	16,15	M	70	39,30	A	50	0,50	A	29
Marker114493	130.492	Cma_Chr04	14814156	G	A	G	18	18,0	A	20	0,20	R	22	17,5	R	9	4,5	R	59	32,27	G	15	15,0	G	21	21,0	R	18	10,8	R	49	28,21	A	44	1,43	R	46	24,22	R	31	16,15	R	70	40,30	A	50	0,50	A	29
Marker114997	130.992	Cma_Chr04	14992031	T	C	C	15	1,14	T	18	18,0	Y	2	1,1	C	4	0,4	Y	7	6,1	C	2	0,2	T	3	3,0	T	2	2,0	Y	13	7,6	T	16	16,0	Y	18	5,13	T	7	7,0	Y	7	3,4	T	16	16,0	T	7
Marker114962	130.992	Cma_Chr04	14988187	T	A	A	16	0,16	T	21	21,0	W	30	15,15	W	23	10,13	W	29	9,20	W	20	2,18	T	17	14,2	W	34	14,20	W	31	15,16	T	8	8,0	W	39	25,14	W	21	12,9	W	22	12,10	T	51	50,0	T	36
Marker114654	130.992	Cma_Chr04	14882352	T	G	G	12	0,12	T	28	28,0	K	5	2,3	K	15	3,12	K	28	17,11	K	12	2,10	G	8	0,8	K	12	5,7	K	29	10,19	T	28	28,0	K	32	16,16	K	13	9,4	K	28	15,13	T	23	22,1	T	3
Marker114653	130.992	Cma_Chr04	14882095	A	G	G	12	1,11	A	26	26,0	R	5	2,3	R	15	3,12	R	28	17,11	R	12	2,10	G	8	0,8	R	13	5,8	R	29	10,18	A	28	28,0	R	30	14,16	R	13	9,4	R	28	15,13	A	23	22,1	A	3
Marker115344	131.702	Cma_Chr04	15044412	A	G	A	19	19,0	G	20	0,20	R	7	1,6	R	6	3,3	R	8	3,5	A	7	7,0	R	5	1,4	R	8	4,4	A	2	2,0	G	20	0,20	A	9	9,0	A	2	2,0	R	12	3,9	G	9	0,9	G	7
Marker115179	133.033	Cma_Chr04	15010052	T	C	C	15	0,15	T	12	12,0	C	3	0,3	Y	3	2,1	Y	9	1,8	C	1	0,1	Y	2	1,1	Y	4	3,1	Y	3	2,1	T	9	9,0	Y	9	7,2	T	2	2,0	Y	5	2,3	T	4	4,0	Y	8
Marker115180	134.244	Cma_Chr04	15010066	A	G	G	14	0,14	A	14	14,0	G	3	0,3	R	3	2,1	R	9	1,8	G	1	0,1	R	2	1,1	R	4	3,1	R	3	2,1	A	10	10,0	R	9	7,2	A	2	2,0	R	5	2,3	A	4	4,0	R	8
Marker115508	134.754	Cma_Chr04	15143694	G	A	G	12	12,0	A	16	0,16	R	7	2,5	R	5	4,1	R	13	7,6	G	2	2,0	R	17	2,15	A	12	0,12	R	15	7,8	A	9	0,9	G	10	10,0	R	9	8,1	R	16	4,12	A	22	0,22	A	11
Marker115181	134.754	Cma_Chr04	15010114	A	G	G	11	0,11	A	16	16,0	G	1	0,1	R	3	2,1	G	9	0,8	N	.	.	R	2	1,1	R	4	2,1	A	2	2,0	A	10	10,0	R	8	6,2	A	2	2,0	R	5	2,3	A	3	3,0	R	8
Marker115424	134.754	Cma_Chr04	15055917	C	A	C	17	16,1	A	17	0,17	M	5	2,3	M	13	7,6	M	47	27,20	C	12	12,0	M	18	14,4	M	13	6,7	M	29	8,21	A	16	0,16	C	29	29,0	M	17	2,15	M	21	8,13	A	28	0,28	A	20
Marker115562	135.754	Cma_Chr04	15150925	C	T	C	15	14,1	T	11	0,11	Y	10	6,4	Y	9	4,5	Y	7	5,2	C	6	6,0	Y	14	6,8	T	8	0,8	Y	13	6,7	T	17	1,16	C	8	7,1	Y	3	1,2	Y	6	1,5	T	11	0,11	T	10
Marker115423	135.754	Cma_Chr04	15055646	G	A	G	21	19,2	A	22	0,22	R	5	2,3	R	13	7,6	R	46	27,19	G	12	12,0	R	20	14,6	R	13	6,7	R	29	8,21	A	16	0,16	G	30	30,0	R	17	2,15	R	22	9,13	A	28	0,28	A	20
Marker115377	135.754	Cma_Chr04	15049933	T	C	T	21	21,0	C	16	1,15	Y	7	4,3	Y	15	2,13	Y	23	9,14	T	14	14,0	Y	12	5,7	Y	22	13,9	Y	31	14,17	C	56	0,56	T	25	24,1	Y	9	3,6	Y	32	19,13	C	32	0,32	C	11
Marker115506	135.754	Cma_Chr04	15143658	A	G	A	10	10,0	G	14	0,14	R	7	2,5	R	5	4,1	R	13	7,6	A	2	2,0	R	17	2,15	G	12	0,12	R	15	7,8	G	9	0,9	A	10	10,0	R	9	8,1	R	16	4,12	G	22	0,22	G	11
Marker115345	135.754	Cma_Chr04	15044434	G	A	G	16	16,0	A	21	0,21	R	7	1,6	R	6	3,3	R	8	3,5	G	7	7,0	R	5	1,4	R	8	4,4	G	2	2,0	A	20	0,20	G	9	9,0	G	2	2,0	R	12	4,8	A	9	0,9	A	7
Marker115563	137.755	Cma_Chr04	15150931	T	G	T	17	16,1	G	11	0,11	K	10	6,4	K	9	4,5	K	7	5,2	T	6	6,0	K	14	6,8	G	8	0,8	K	13	6,7	G	17	1,16	T	8	8,0	G	3	1,2	K	6	1,5	G	11	0,11	G	10
Marker115507	137.755	Cma_Chr04	15143680	T	G	T	10	10,0	G	17	0,17	K	7	2,5	K	5	4,1	K	13	7,6	T	2	2,0	K	17	2,15	G	12	0,12	K	15	7,8	G	9	0,9	T	10	10,0	K	9	8,1	K	16	4,12	G	22	0,22	G	11
Marker115549	137.755	Cma_Chr04	15148363	C	T	C	16	15,1	T	20	0,20	Y	14	6,8	Y	12	6,6	Y	24	11,13	C	18	18,0	Y	29	15,14	T	11	0,11	Y	17	6,11	T	26	0,26	C	21	21,0	Y	6	3,3	Y	9	3,6	T	15	0,15	T	12
Marker115548	137.755	Cma_Chr04	15148328	G	A	G	15	14,1	A	18	0,18	R	14	6,8	R	12	6,6	R	24	11,13	G	18	18,0	R	30	15,15	A	11	0,11	R	17	6,11	A	26	0,26	G	21	21,0	R	6	3,3	R	9	3,6	A	15	0,15	A	12
Marker115792	138.255	Cma_Chr04	15380723	A	G	G	15	0,15	A	16	16,0	N	.	.	N	.	.	R	8	4,4	G	1	0,1	G	1	0,1	A	1	1,0	R	10	4,6	A	12	12,0	G	6	0,6	G	1	0,1	R	7	1,6	A	7	7,0	N	.
Marker115790	140.256	Cma_Chr04	15380699	G	T	T	17	0,17	G	17	17,0	N	.	.	T	1	0,1	K	8	4,4	T	1	0,1	T	1	0,1	G	1	1,0	K	10	4,6	G	12	12,0	T	6	0,6	T	1	0,1	K	7	1,6	G	6	6,0	N	.
Marker115791	140.756	Cma_Chr04	15380712	C	A	A	17	0,17	C	18	18,0	N	.	.	A	1	0,1	M	8	4,4	A	1	0,1	A	1	0,1	C	1	1,0	M	10	4,6	C	12	12,0	A	6	0,6	A	1	0,1	M	7	1,6	C	7	7,0	N	.
Marker115754	141.256	Cma_Chr04	15376371	T	C	C	22	0,22	T	21	21,0	Y	31	18,13	Y	18	5,13	Y	23	14,9	C	25	0,25	Y	31	10,21	T	20	20,0	Y	23	9,14	T	15	15,0	C	26	1,25	Y	7	3,4	Y	35	26,9	T	34	34,0	T	11
Marker115904	141.756	Cma_Chr04	15490349	T	C	C	26	0,26	T	20	20,0	Y	31	17,14	Y	7	3,4	Y	36	20,16	C	25	0,24	Y	22	5,17	Y	26	11,15	Y	27	18,9	T	26	26,0	C	37	1,36	Y	22	6,16	Y	39	16,22	T	25	25,0	T	8
Marker115755	141.756	Cma_Chr04	15376401	T	C	C	21	0,21	T	20	20,0	Y	31	18,13	Y	18	5,13	Y	23	14,9	C	25	0,25	Y	31	10,21	T	20	20,0	Y	23	9,14	T	15	15,0	C	25	1,24	Y	7	3,4	Y	35	26,9	T	34	34,0	T	11
Marker117343	142.756	Cma_Chr04	15771403	A	G	A	16	15,1	G	20	0,20	R	26	17,9	R	15	8,7	R	28	8,20	A	24	24,0	R	25	12,13	R	35	13,22	R	31	15,16	G	16	0,16	A	22	22,0	R	17	6,11	R	29	9,20	G	22	0,22	G	24
Marker116504	143.256	Cma_Chr04	15655174	A	G	G	17	0,17	A	10	10,0	N	.	.	R	9	5,4	R	8	3,5	G	10	0,10	R	6	3,3	R	2	1,1	G	1	0,1	A	13	13,0	G	8	0,8	R	8	2,6	G	5	0,5	A	6	6,0	A	2
Marker115753	143.256	Cma_Chr04	15376339	T	C	C	22	0,22	T	23	23,0	Y	31	18,13	Y	18	5,13	Y	23	14,9	C	25	0,25	Y	31	10,21	T	20	20,0	Y	23	9,14	T	15	15,0	C	26	1,25	Y	7	3,4	Y	35	26,9	T	34	34,0	T	11
Marker117740	144.256	Cma_Chr04	15852867	C	T	T	15	0,15	C	14	14,0	Y	15	9,6	Y	16	10,6	Y	36	30,6	T	8	0,8	Y	6	4,2	C	28	26,2	Y	21	10,11	C	32	32,0	T	17	0,17	Y	11	7,4	Y	22	17,5	C	45	44,1	C	18
Marker115905	144.256	Cma_Chr04	15490425	A	G	G	25	0,25	A	19	19,0	R	31	17,14	R	7	3,4	R	36	20,16	G	25	0,25	R	22	5,17	R	27	11,16	R	27	18,9	A	26	26,0	G	38	1,37	R	23	7,16	R	39	17,22	A	27	26,1	A	9
Marker116093	144.756	Cma_Chr04	15570283	T	C	C	14	0,14	T	19	19,0	Y	21	15,6	Y	24	12,12	Y	30	20,10	C	7	0,7	Y	30	18,12	Y	22	12,10	Y	35	22,13	T	37	36,1	Y	25	2,23	Y	19	13,6	Y	55	35,20	T	43	43,0	T	26
Marker116373	144.756	Cma_Chr04	15629874	A	G	G	14	0,14	A	15	15,0	R	11	2,9	R	11	4,7	R	20	10,10	G	13	0,13	R	14	3,11	R	8	4,4	R	30	7,23	A	33	33,0	G	27	0,27	R	8	4,4	R	29	15,14	A	22	22,0	A	18
Marker117052	144.756	Cma_Chr04	15717795	T	C	C	16	0,16	T	16	16,0	Y	9	6,3	Y	12	5,7	Y	31	20,11	C	7	0,7	Y	14	6,8	Y	20	12,8	Y	17	10,7	T	25	25,0	C	17	0,17	Y	19	14,5	Y	23	10,13	T	41	41,0	T	1
Marker117051	144.756	Cma_Chr04	15717785	G	A	G	15	15,0	A	17	0,17	R	9	3,6	R	12	7,5	R	31	11,20	G	7	7,0	R	14	8,6	R	20	8,12	R	17	7,10	A	25	0,25	G	17	17,0	R	19	5,14	R	23	13,10	A	41	0,41	A	1
Marker117050	144.756	Cma_Chr04	15717767	A	G	G	14	0,14	A	15	15,0	R	9	6,3	R	12	5,7	R	31	20,11	G	7	0,7	R	14	6,8	R	20	12,8	R	17	10,7	A	25	24,0	G	17	0,17	R	19	14,5	R	23	10,13	A	41	41,0	A	1
Marker117048	144.756	Cma_Chr04	15717539	G	A	A	15	0,15	G	17	17,0	R	9	6,3	R	12	5,7	R	30	20,10	A	7	0,7	R	14	6,8	R	19	12,7	R	17	9,7	G	25	25,0	A	17	0,17	R	19	14,5	R	23	10,13	G	41	41,0	G	1
Marker116830	144.756	Cma_Chr04	15694680	C	A	A	17	0,17	C	16	16,0	M	56	45,11	M	43	17,26	M	121	57,64	A	54	1,53	M	91	46,45	M	35	20,15	M	57	31,26	C	63	63,0	A	65	3,62	M	38	18,20	M	181	85,96	C	106	105,1	C	41
Marker116829	144.756	Cma_Chr04	15694674	T	G	G	17	0,17	T	16	16,0	K	56	45,11	K	43	18,25	K	121	57,64	G	54	1,53	K	91	46,45	K	35	20,15	K	57	30,26	T	63	63,0	G	65	3,62	K	38	18,20	K	181	86,95	T	106	105,1	T	41
Marker116828	144.756	Cma_Chr04	15694656	C	T	T	18	0,18	C	16	16,0	Y	56	45,11	Y	43	17,25	Y	120	55,64	T	54	1,53	Y	91	45,45	Y	35	20,15	Y	57	31,26	C	62	61,1	T	64	3,61	Y	38	18,20	Y	181	84,95	C	106	105,1	C	41
Marker116827	144.756	Cma_Chr04	15694507	A	C	C	13	0,13	A	16	16,0	M	55	45,10	M	44	18,26	M	122	58,64	C	53	1,52	M	92	46,46	M	36	21,15	M	57	31,26	A	61	60,1	C	65	3,62	M	37	18,19	M	181	86,95	A	106	105,1	A	40
Marker116826	144.756	Cma_Chr04	15694489	C	G	G	13	0,13	C	14	14,0	S	56	45,10	S	44	18,26	S	122	58,64	G	54	1,53	S	92	46,46	S	36	21,15	S	57	31,26	C	61	61,0	G	66	3,63	S	37	18,19	S	181	86,95	C	106	105,1	C	40
Marker116825	144.756	Cma_Chr04	15694455	T	C	C	17	0,17	T	15	15,0	Y	56	45,11	Y	44	18,26	Y	122	58,64	C	54	1,53	Y	92	46,46	Y	36	21,15	Y	57	30,26	T	61	61,0	C	66	3,63	Y	37	18,19	Y	181	86,95	T	106	105,1	T	40
Marker116716	144.756	Cma_Chr04	15683922	C	T	C	15	15,0	T	18	0,18	Y	29	19,10	Y	15	2,13	Y	36	14,22	C	14	14,0	Y	50	25,25	Y	22	9,13	Y	28	15,13	T	22	0,22	C	39	39,0	Y	14	2,12	Y	67	31,36	T	40	0,40	T	7
Marker116187	144.756	Cma_Chr04	15591852	C	A	A	16	0,16	C	18	18,0	M	11	6,5	C	16	15,1	M	22	13,9	M	6	1,5	M	24	13,11	M	18	13,5	M	24	19,5	C	15	15,0	A	7	0,7	M	3	2,1	M	21	11,10	C	19	19,0	C	11
Marker117477	144.756	Cma_Chr04	15786898	T	C	T	11	11,0	C	19	0,19	Y	23	14,9	Y	10	2,8	Y	51	25,26	T	17	17,0	C	22	1,21	Y	22	10,12	Y	22	12,10	C	10	0,10	T	19	19,0	Y	22	14,8	Y	27	9,18	C	14	0,14	Y	12
Marker116122	144.756	Cma_Chr04	15576705	A	G	G	21	0,21	A	18	18,0	R	28	11,17	R	33	16,17	R	113	64,49	G	32	0,32	R	82	57,25	R	70	31,39	R	35	20,15	A	34	32,2	G	97	3,94	R	59	31,28	R	121	59,62	A	83	83,0	A	53
Marker117466	145.757	Cma_Chr04	15786412	C	T	C	22	21,1	T	18	0,18	Y	19	14,5	Y	9	4,5	Y	20	4,16	C	15	15,0	Y	10	6,4	Y	17	9,8	Y	27	21,6	T	15	0,15	C	8	8,0	T	5	0,5	Y	11	3,8	T	11	0,11	T	15
Marker117071	145.757	Cma_Chr04	15720723	G	A	A	19	1,18	G	11	11,0	R	18	11,7	R	6	2,4	G	2	2,0	A	5	0,5	R	10	4,6	A	5	0,5	R	6	4,2	G	14	14,0	A	16	0,16	R	10	3,7	R	6	2,4	G	1	1,0	G	7
Marker117739	145.757	Cma_Chr04	15852843	G	A	A	12	0,12	G	14	14,0	R	15	9,6	R	16	10,6	R	36	30,6	A	8	0,8	R	6	4,2	G	28	26,2	R	21	10,11	G	32	32,0	A	18	0,18	R	11	7,4	R	22	17,5	G	46	44,2	G	18
Marker118299	146.262	Cma_Chr04	15970586	A	C	C	13	0,13	A	12	12,0	M	3	1,2	A	2	2,0	M	16	9,7	C	5	0,5	M	33	14,19	M	5	2,3	M	20	16,4	A	29	29,0	C	20	0,20	M	7	4,3	M	13	9,4	A	23	23,0	C	5
Marker115961	146.262	Cma_Chr04	15505893	G	A	A	21	2,19	G	19	19,0	G	14	13,1	R	12	3,9	R	70	33,37	A	41	0,41	R	53	37,16	R	43	24,19	R	41	21,20	G	29	28,1	A	61	0,61	R	32	21,11	R	98	48,50	G	64	63,1	G	23
Marker117578	146.262	Cma_Chr04	15806979	G	T	G	15	14,1	T	12	0,12	K	4	2,2	K	8	4,4	K	5	4,1	G	14	14,0	K	10	7,3	K	7	5,2	K	13	5,8	T	5	0,5	G	14	14,0	K	8	5,3	K	20	12,8	T	14	0,14	T	14
Marker118371	146.762	Cma_Chr04	15982995	G	A	A	18	0,18	G	21	21,0	R	3	1,2	R	9	2,7	R	10	5,5	A	6	0,6	R	13	9,4	R	6	2,4	R	9	8,1	G	14	14,0	A	24	0,24	R	2	1,1	R	11	8,3	G	14	13,1	R	9
Marker117469	146.762	Cma_Chr04	15786636	T	C	T	18	17,1	C	20	0,20	Y	19	14,5	Y	10	4,6	Y	20	4,16	T	16	16,0	Y	10	6,4	Y	17	9,8	Y	27	21,6	C	14	0,14	T	8	8,0	C	5	0,5	Y	11	3,8	C	11	0,11	C	15
Marker117864	146.762	Cma_Chr04	15888520	T	A	T	12	12,0	A	21	0,21	W	5	1,4	W	11	6,5	W	9	6,3	T	8	8,0	W	4	3,1	W	11	4,7	W	12	3,9	A	10	0,10	T	15	15,0	A	2	0,2	W	15	6,9	A	20	0,20	A	14
Marker117073	146.762	Cma_Chr04	15720768	G	A	G	21	20,1	A	16	0,16	R	18	7,11	R	6	4,2	A	2	0,2	G	5	5,0	R	10	6,4	G	5	5,0	R	6	2,4	A	14	0,14	G	16	16,0	R	10	6,4	R	6	4,2	A	1	0,1	A	7
Marker117072	146.762	Cma_Chr04	15720730	C	A	A	18	1,17	C	10	10,0	M	18	11,7	M	6	2,4	C	2	2,0	A	5	0,5	M	10	4,6	A	5	0,5	M	6	4,2	C	14	14,0	A	16	0,16	M	10	3,7	M	6	2,4	C	1	1,0	C	7
Marker117465	146.762	Cma_Chr04	15786391	T	C	C	19	1,18	T	15	15,0	Y	19	5,14	Y	9	4,4	Y	20	16,4	C	15	0,15	Y	10	4,6	Y	17	8,9	Y	27	6,21	T	15	15,0	C	8	0,8	T	5	5,0	Y	11	8,3	T	11	11,0	T	15
Marker118125	146.762	Cma_Chr04	15943687	A	G	A	10	10,0	G	19	0,19	R	10	6,4	R	7	3,4	R	7	2,5	G	1	0,1	G	6	0,6	R	8	4,4	R	9	6,3	G	64	0,64	A	19	19,0	R	3	1,2	R	9	5,4	G	10	0,10	R	11
Marker118124	146.762	Cma_Chr04	15943681	G	A	G	10	10,0	A	19	0,19	R	10	6,4	R	7	3,4	R	7	2,5	A	1	0,1	A	6	0,6	R	8	4,4	R	9	6,3	A	64	0,64	G	19	19,0	R	3	1,2	R	9	5,4	A	10	0,10	R	11
Marker117574	147.262	Cma_Chr04	15806411	G	A	G	13	13,0	A	19	0,19	R	9	8,1	R	6	3,3	G	6	6,0	G	10	10,0	G	8	8,0	R	10	8,2	R	19	7,12	A	23	0,23	G	11	10,0	R	7	2,5	G	6	6,0	A	22	0,22	A	1
Marker118465	147.262	Cma_Chr04	15996549	G	C	C	18	0,18	G	16	16,0	S	14	7,7	G	6	6,0	S	18	4,14	C	14	0,14	S	30	12,18	S	24	13,10	S	14	3,11	G	12	12,0	C	21	1,20	S	13	9,4	S	31	9,22	G	27	27,0	S	17
Marker117768	147.262	Cma_Chr04	15860988	T	A	A	18	1,17	T	14	14,0	W	17	7,10	T	9	9,0	W	24	10,14	A	21	0,21	W	9	3,6	W	11	6,5	W	11	9,2	T	15	15,0	A	28	0,28	W	4	1,3	W	15	10,5	T	31	31,0	T	18
Marker118064	147.262	Cma_Chr04	15929861	C	T	C	17	17,0	T	17	0,17	Y	30	16,14	Y	36	14,22	Y	24	9,15	C	22	22,0	Y	15	6,9	Y	17	8,9	Y	19	11,8	T	38	0,38	C	33	33,0	Y	18	7,11	Y	26	8,18	T	34	0,34	Y	14
Marker118063	147.262	Cma_Chr04	15929828	G	C	G	11	11,0	C	14	0,14	S	30	16,14	S	36	14,22	S	24	9,15	G	22	22,0	S	15	6,9	S	17	8,9	S	19	11,8	C	38	0,38	G	33	33,0	S	18	7,11	S	26	8,18	C	34	0,34	S	14
Marker118062	147.262	Cma_Chr04	15929822	G	T	G	13	13,0	T	13	0,13	K	30	16,14	K	36	14,22	K	24	9,15	G	22	22,0	K	15	6,9	K	17	8,9	K	19	11,8	T	38	0,38	G	33	33,0	K	18	7,11	K	26	8,18	T	34	0,34	K	14
Marker118829	147.967	Cma_Chr04	16115203	G	C	C	21	0,21	G	17	17,0	C	7	0,7	S	16	9,7	G	4	4,0	C	9	0,9	S	5	2,3	S	15	7,8	S	14	5,9	G	17	17,0	C	4	0,4	S	6	3,3	S	4	1,3	G	4	4,0	S	5
Marker119058	148.967	Cma_Chr04	16206953	G	A	A	20	1,19	G	20	20,0	A	15	0,15	R	6	5,1	R	29	24,5	A	17	0,17	R	35	22,13	A	2	0,2	R	27	15,12	G	37	37,0	A	24	0,24	R	11	5,6	R	15	6,9	R	25	23,2	R	13
Marker118828	148.967	Cma_Chr04	16115145	C	A	A	24	1,23	C	13	13,0	A	7	0,7	M	16	9,7	C	4	4,0	A	9	0,9	M	5	2,3	M	15	7,8	M	14	5,9	C	17	17,0	A	4	0,4	M	6	3,3	M	4	1,3	C	4	4,0	M	5
Marker117573	148.967	Cma_Chr04	15806350	G	A	G	16	16,0	A	22	0,22	R	9	8,1	R	6	3,3	G	6	6,0	G	10	10,0	G	8	8,0	R	10	8,2	R	20	8,12	A	24	0,23	G	11	11,0	R	7	2,5	G	6	6,0	A	22	0,22	A	1
Marker119134	149.467	Cma_Chr04	16228772	T	A	T	14	14,0	A	19	0,19	T	12	12,0	W	11	2,9	W	25	19,6	T	8	8,0	W	12	7,5	W	16	8,8	W	20	12,8	A	33	0,33	T	30	30,0	W	21	11,10	W	22	17,5	A	15	0,15	W	10
Marker119295	150.467	Cma_Chr04	16287229	G	C	G	11	11,0	C	17	0,17	S	12	11,1	S	13	3,10	S	36	21,15	G	9	9,0	S	18	10,8	S	17	8,9	S	29	21,8	C	29	0,29	G	20	20,0	S	22	8,14	S	36	19,17	C	25	0,24	S	22
Marker119803	151.172	Cma_Chr04	16662036	C	T	T	16	0,16	C	21	21,0	T	23	0,23	Y	36	8,27	C	58	58,0	T	45	0,45	Y	45	12,33	Y	47	26,21	Y	35	16,19	C	12	12,0	T	58	0,57	Y	41	21,20	Y	76	44,32	C	74	73,1	Y	25
Marker119296	152.172	Cma_Chr04	16287252	T	A	T	13	13,0	A	21	0,21	W	12	11,1	W	13	3,10	W	36	21,15	T	9	9,0	W	18	10,8	W	17	8,9	W	29	21,8	A	29	0,29	T	20	20,0	W	22	8,13	W	36	20,16	A	25	0,25	W	22
Marker119473	153.172	Cma_Chr04	16542980	A	G	G	10	0,10	A	13	13,0	G	15	1,14	R	7	5,2	A	26	25,1	G	7	0,7	R	11	10,1	R	14	11,3	R	15	7,8	A	25	25,0	G	19	0,19	R	11	7,4	R	17	10,7	A	18	18,0	R	4
Marker119884	154.173	Cma_Chr04	16677371	T	C	C	23	0,23	T	22	22,0	C	4	0,4	Y	8	3,5	T	15	15,0	C	10	0,10	Y	6	2,4	Y	12	3,9	Y	18	11,7	T	21	20,1	C	13	0,13	Y	5	2,3	Y	17	10,7	T	5	5,0	Y	5
Marker120268	156.174	Cma_Chr04	16792474	G	C	C	18	0,18	G	21	21,0	C	17	0,17	S	17	2,15	G	17	17,0	C	14	0,14	S	9	2,7	S	12	7,5	S	22	6,16	G	22	22,0	C	29	0,29	S	14	2,12	S	14	2,11	G	21	21,0	S	15
Marker120406	157.174	Cma_Chr04	16819412	T	C	C	18	0,18	T	18	18,0	C	27	0,27	Y	30	17,13	T	76	75,0	C	33	0,33	Y	39	16,23	Y	31	13,18	Y	53	24,29	T	65	64,1	C	49	0,49	Y	18	11,7	Y	62	38,24	T	50	49,1	Y	29
Marker120409	157.674	Cma_Chr04	16822805	T	G	G	11	0,11	T	26	26,0	G	18	0,18	K	6	3,3	T	10	10,0	G	12	0,12	K	7	2,5	K	11	3,8	K	14	7,7	T	26	26,0	G	19	0,19	K	10	4,6	K	11	3,8	T	8	8,0	K	8
Marker120229	157.674	Cma_Chr04	16788932	A	G	G	21	0,21	A	13	13,0	G	8	0,8	R	10	4,6	A	19	19,0	G	9	0,9	R	23	21,2	R	10	4,6	R	26	15,11	A	10	10,0	G	21	0,21	R	8	5,3	R	20	10,10	A	8	8,0	R	11
Marker119555	157.674	Cma_Chr04	16608429	A	G	G	12	0,12	A	15	15,0	G	38	0,38	R	27	3,24	A	36	36,0	G	27	0,27	R	26	7,19	R	42	20,22	R	37	16,20	A	43	43,0	G	40	0,40	R	31	19,12	R	47	18,29	A	43	43,0	R	20
Marker119554	157.674	Cma_Chr04	16608417	C	G	G	14	0,14	C	16	16,0	G	38	0,38	S	26	3,23	C	36	36,0	G	27	0,27	S	26	7,19	S	42	20,22	S	36	16,20	C	43	43,0	G	40	0,40	S	31	19,12	S	47	18,29	C	43	43,0	S	20
Marker119994	157.674	Cma_Chr04	16722338	A	G	A	14	14,0	G	13	0,13	A	19	19,0	R	27	15,12	G	73	0,73	A	17	17,0	R	42	27,15	R	48	24,24	R	35	21,14	G	21	1,20	A	48	47,1	R	19	8,11	R	70	34,36	G	48	0,48	R	37
Marker119993	157.674	Cma_Chr04	16722287	A	G	A	15	15,0	G	13	0,13	A	19	19,0	R	27	15,12	G	74	0,74	A	17	17,0	R	42	27,15	R	48	24,24	R	35	21,14	G	21	1,20	A	48	47,1	R	19	8,11	R	70	34,36	G	48	0,48	R	37
Marker119989	157.674	Cma_Chr04	16722087	G	A	G	16	16,0	A	14	0,14	G	19	19,0	R	27	15,12	A	74	0,74	G	17	17,0	R	41	27,14	R	47	23,24	R	35	21,14	A	23	1,22	G	45	44,1	R	19	8,11	R	70	35,35	A	46	0,46	R	34
Marker119988	157.674	Cma_Chr04	16722080	A	G	A	15	15,0	G	16	0,16	A	19	19,0	R	27	15,12	G	74	0,74	A	17	17,0	R	42	27,15	R	47	23,24	R	35	21,14	G	23	1,22	A	45	44,1	R	19	8,11	R	70	34,36	G	46	0,46	R	34
Marker119987	157.674	Cma_Chr04	16722056	A	T	A	15	15,0	T	15	0,15	A	19	19,0	W	27	15,12	T	74	0,74	A	17	17,0	W	42	27,15	W	47	23,24	W	35	21,14	T	23	1,22	A	45	44,1	W	19	8,11	W	70	34,36	T	44	0,44	W	34
Marker119881	157.674	Cma_Chr04	16677025	C	T	T	25	0,25	C	14	14,0	T	4	0,4	Y	10	2,8	C	17	17,0	T	8	0,8	Y	22	6,16	Y	20	3,17	Y	10	4,6	Y	18	16,2	T	27	0,27	Y	10	8,2	Y	26	10,16	C	20	20,0	Y	21
Marker119638	157.674	Cma_Chr04	16619886	G	A	A	13	0,13	G	17	17,0	A	80	2,78	R	48	28,20	G	90	88,2	A	81	0,80	R	91	44,47	R	80	48,30	R	76	35,41	G	43	41,2	A	73	1,72	R	57	21,36	R	115	69,46	G	109	108,1	R	51
Marker119463	157.674	Cma_Chr04	16502406	G	A	G	17	17,0	A	16	1,15	G	5	5,0	G	6	6,0	A	10	0,10	G	8	8,0	R	17	6,11	R	8	3,5	R	10	2,8	A	5	0,5	G	9	9,0	R	9	1,8	R	7	6,1	A	5	0,5	G	5
Marker119885	157.674	Cma_Chr04	16677397	G	A	A	19	0,19	G	22	22,0	A	4	0,4	R	8	3,5	G	15	15,0	A	10	0,10	R	6	2,4	R	12	3,9	R	18	11,7	G	21	20,1	A	11	0,11	R	5	2,3	R	17	10,7	G	5	5,0	R	5
Marker119864	158.174	Cma_Chr04	16675119	A	G	G	16	0,16	A	17	17,0	G	7	0,7	R	4	2,2	A	15	15,0	G	5	0,5	R	18	4,14	R	9	3,6	R	15	7,8	A	10	10,0	G	27	1,26	R	8	1,7	A	1	1,0	A	7	7,0	R	9
Marker120266	158.174	Cma_Chr04	16792253	C	A	A	19	0,19	C	17	17,0	A	17	0,17	A	17	2,15	C	17	17,0	A	14	0,14	M	9	2,7	M	12	7,5	M	22	6,16	C	22	22,0	A	29	0,29	M	15	2,13	M	14	2,12	C	21	21,0	M	15
Marker119922	158.674	Cma_Chr04	16696844	C	A	A	12	0,12	C	19	19,0	A	10	0,10	M	14	4,10	C	24	24,0	A	9	0,9	M	7	2,5	M	7	1,6	M	18	8,10	C	3	3,0	A	30	0,30	A	7	0,7	M	23	9,14	C	16	16,0	M	14
Marker120394	158.674	Cma_Chr04	16817093	G	T	T	13	0,13	G	17	17,0	K	13	1,12	K	7	3,4	G	3	3,0	T	6	0,6	K	7	4,3	K	5	4,1	K	11	2,9	G	20	20,0	T	16	0,16	K	2	1,1	K	13	6,7	G	9	9,0	K	5
Marker120062	158.674	Cma_Chr04	16740189	A	G	G	15	0,15	A	20	20,0	G	12	0,12	R	11	5,6	A	17	17,0	G	10	0,10	R	17	13,4	R	18	7,11	R	21	7,14	A	52	52,0	G	25	0,25	G	6	0,6	R	17	5,12	A	15	15,0	R	7
Marker120375	158.674	Cma_Chr04	16810058	C	A	A	14	0,14	C	20	20,0	A	10	0,10	A	5	0,5	C	13	13,0	A	13	0,13	M	16	4,12	M	11	6,5	M	9	3,6	C	10	10,0	A	13	0,13	M	7	1,6	M	19	13,6	C	20	20,0	M	2
Marker120189	159.674	Cma_Chr04	16781992	A	G	G	15	0,15	A	25	25,0	G	7	0,7	R	4	2,2	A	5	5,0	G	5	0,5	R	17	2,15	R	11	1,10	R	14	9,5	A	9	9,0	R	6	2,4	A	2	2,0	R	9	8,1	A	8	8,0	R	7
Marker120918	159.674	Cma_Chr04	17054776	A	G	A	12	12,0	G	20	0,20	A	15	15,0	R	16	10,6	G	20	0,20	A	5	5,0	R	30	17,13	G	13	0,13	R	14	6,8	G	27	1,26	A	25	25,0	A	16	16,0	R	19	6,13	G	13	0,13	R	9
Marker120841	160.174	Cma_Chr04	17024655	T	C	T	20	20,0	C	23	0,23	T	7	7,0	Y	3	2,1	C	13	0,13	T	7	7,0	Y	14	9,5	Y	6	2,3	Y	12	1,11	C	15	0,15	T	9	9,0	Y	5	3,2	Y	9	4,5	C	25	0,25	Y	6
Marker120405	160.174	Cma_Chr04	16818619	A	T	T	11	0,11	A	16	15,1	T	6	0,6	W	5	4,1	A	22	22,0	T	4	0,4	W	2	1,1	W	25	13,12	W	8	2,6	N	.	.	T	6	0,6	W	8	6,2	W	36	12,24	A	29	29,0	W	9
Marker120188	160.174	Cma_Chr04	16781967	C	T	T	13	0,13	C	19	19,0	T	7	0,7	Y	4	2,2	C	5	5,0	T	5	0,5	Y	17	2,15	Y	11	1,10	Y	14	9,5	C	9	9,0	Y	6	2,4	C	2	2,0	Y	10	9,1	C	8	8,0	Y	7
Marker120495	160.674	Cma_Chr04	16912918	A	T	A	20	20,0	T	23	0,23	A	14	14,0	A	13	12,0	W	8	1,7	A	24	24,0	W	13	11,2	A	5	5,0	W	17	14,3	W	6	2,4	A	19	19,0	A	9	9,0	W	8	5,3	T	3	0,3	W	10
Marker120812	161.674	Cma_Chr04	17018237	A	T	A	12	12,0	T	15	0,15	A	23	23,0	W	11	7,4	T	26	0,26	A	12	12,0	W	19	9,10	W	17	9,8	W	59	24,35	T	5	0,5	A	24	24,0	A	8	8,0	W	28	15,13	T	54	1,53	W	17
Marker120605	162.174	Cma_Chr04	16955189	A	T	A	17	17,0	T	13	0,13	A	15	15,0	W	12	3,9	T	12	0,12	A	6	6,0	W	5	4,1	W	5	3,2	W	11	6,5	T	38	0,38	A	11	11,0	A	7	7,0	W	20	11,9	T	8	0,8	W	6
Marker120740	162.174	Cma_Chr04	17004342	A	T	A	14	14,0	T	19	0,19	A	10	10,0	W	18	5,13	T	20	0,20	A	7	7,0	W	12	5,7	W	20	11,9	W	24	12,12	T	16	0,16	A	18	18,0	A	15	15,0	W	29	12,17	W	13	1,12	W	16
Marker120663	162.174	Cma_Chr04	16976705	C	T	C	13	13,0	T	19	0,19	C	14	14,0	C	3	3,0	T	39	0,39	Y	4	3,1	Y	33	17,16	Y	18	6,12	Y	8	6,2	T	32	0,32	C	9	9,0	C	23	22,1	Y	27	7,20	T	30	0,30	Y	14
Marker120662	162.174	Cma_Chr04	16976699	T	C	T	13	13,0	C	18	0,18	T	14	14,0	T	3	3,0	C	39	0,39	Y	4	3,1	Y	33	17,16	Y	18	6,12	Y	8	6,2	C	32	0,32	T	9	9,0	T	23	22,1	Y	27	7,20	C	30	0,30	Y	14
Marker120729	162.174	Cma_Chr04	16999829	T	C	T	13	13,0	C	18	0,18	T	16	15,1	Y	17	8,9	C	60	0,60	T	22	21,1	Y	57	36,21	Y	18	5,13	Y	38	24,14	Y	17	2,15	T	53	53,0	T	28	28,0	Y	45	26,19	C	75	0,75	Y	27
Marker120628	162.174	Cma_Chr04	16958598	G	A	G	11	11,0	A	22	0,22	G	32	31,0	R	15	11,4	A	48	0,48	G	19	19,0	R	31	20,10	R	29	24,5	R	20	7,13	A	11	0,11	G	40	40,0	G	31	31,0	R	49	26,23	A	46	0,46	R	17
Marker120950	162.674	Cma_Chr04	17067021	A	G	A	18	18,0	G	18	0,18	A	25	25,0	A	9	9,0	G	7	0,7	A	45	45,0	R	26	23,3	G	6	0,6	R	19	14,5	G	17	0,17	A	44	44,0	A	29	29,0	R	22	20,2	G	7	0,7	R	18
Marker120909	162.674	Cma_Chr04	17052053	A	C	A	16	16,0	C	22	0,22	A	19	19,0	M	8	6,2	C	11	0,11	A	12	12,0	M	7	3,4	C	9	0,9	M	24	20,4	C	60	0,60	A	20	20,0	A	6	6,0	M	8	3,5	C	16	0,16	M	6
Marker120538	162.674	Cma_Chr04	16921430	T	C	T	18	18,0	C	18	0,18	T	6	5,0	Y	5	3,2	C	23	0,21	T	8	8,0	Y	8	5,3	Y	9	3,6	Y	19	9,10	C	34	0,34	Y	29	26,3	T	13	13,0	Y	15	9,6	C	20	1,19	Y	12
Marker120537	162.674	Cma_Chr04	16921400	G	A	G	22	22,0	A	18	0,18	G	6	6,0	R	5	3,2	A	23	0,23	G	8	8,0	R	8	5,3	R	9	3,6	R	19	9,10	A	34	0,34	R	29	26,3	G	13	13,0	R	15	9,6	A	21	1,20	R	12
Marker120606	162.674	Cma_Chr04	16955207	C	T	C	14	14,0	T	15	0,15	C	15	15,0	Y	12	3,9	T	12	0,12	C	6	6,0	Y	5	4,1	Y	5	3,2	Y	11	6,5	T	38	0,38	C	11	11,0	C	7	7,0	Y	20	11,9	T	8	0,8	Y	6
Marker120964	163.674	Cma_Chr04	17071126	A	G	A	17	17,0	G	13	0,13	A	12	12,0	R	18	13,5	G	9	0,9	A	24	24,0	R	4	2,2	G	21	0,21	R	13	9,4	G	20	0,20	A	16	16,0	A	4	4,0	R	9	2,7	G	6	0,6	R	10
Marker120607	163.674	Cma_Chr04	16955219	G	T	G	14	14,0	T	14	0,14	G	15	15,0	K	12	3,9	T	12	0,12	G	6	6,0	K	5	4,1	K	5	3,2	K	11	6,5	T	38	0,38	G	11	11,0	G	7	7,0	K	20	11,9	T	8	0,8	K	6
Marker120927	164.174	Cma_Chr04	17062386	G	A	G	24	24,0	A	19	0,19	G	5	5,0	R	19	11,8	A	7	0,7	G	3	3,0	R	8	4,4	A	5	0,5	R	10	5,5	A	16	0,16	G	8	8,0	N	.	.	R	4	1,3	A	7	0,7	N	.
Marker120926	164.174	Cma_Chr04	17062371	C	A	C	24	24,0	A	19	0,19	C	5	5,0	M	19	11,8	A	8	0,8	C	3	3,0	M	8	4,4	A	6	0,6	M	10	5,5	A	16	0,16	C	8	8,0	N	.	.	M	4	1,3	A	7	0,7	N	.
Marker120995	164.674	Cma_Chr04	17076327	C	T	C	19	19,0	T	15	0,15	C	13	12,1	Y	15	9,6	Y	9	1,8	C	6	6,0	Y	15	8,7	T	7	0,7	Y	16	7,9	T	19	0,19	C	22	22,0	C	8	8,0	Y	11	7,4	T	16	0,16	Y	7
Marker121170	165.174	Cma_Chr04	17145738	T	C	T	12	12,0	C	15	0,15	T	11	11,0	Y	11	6,5	C	37	1,36	T	10	10,0	Y	15	11,4	C	12	0,12	Y	16	8,8	C	20	0,20	T	35	34,1	T	6	6,0	Y	33	23,10	C	18	1,16	T	9
Marker121141	165.174	Cma_Chr04	17122754	A	C	A	15	15,0	C	26	0,26	A	12	12,0	M	3	1,2	C	10	0,10	A	6	6,0	M	20	11,9	C	6	0,6	M	12	9,3	C	28	0,28	M	10	9,1	A	2	2,0	M	8	7,1	C	7	0,7	M	4
Marker120947	165.174	Cma_Chr04	17065848	T	C	T	21	21,0	C	17	0,17	T	9	9,0	Y	17	9,8	C	7	0,7	T	11	11,0	Y	11	2,9	C	4	0,4	Y	10	4,6	C	15	0,15	T	9	9,0	T	9	9,0	Y	2	1,1	C	8	0,8	Y	4
Marker120996	165.174	Cma_Chr04	17076337	G	A	G	18	18,0	A	15	0,15	G	13	12,1	R	16	9,7	R	9	1,8	G	6	6,0	R	15	8,7	A	7	0,7	R	16	7,9	A	19	0,19	G	22	22,0	G	8	8,0	R	11	6,5	A	16	0,16	R	7
Marker121278	165.174	Cma_Chr04	17160539	C	T	C	11	11,0	T	13	0,13	C	2	2,0	T	4	0,4	T	20	0,20	Y	7	4,3	Y	10	4,6	T	10	0,10	Y	4	2,2	T	16	0,16	C	14	13,1	C	4	4,0	Y	9	2,7	T	29	1,28	T	8
Marker121234	165.174	Cma_Chr04	17152017	T	G	T	17	17,0	G	17	0,17	T	16	15,1	K	28	22,6	G	33	0,33	T	13	13,0	K	35	11,24	G	23	0,23	K	31	13,18	G	23	1,22	T	32	32,0	T	30	28,2	K	35	12,23	G	31	0,31	K	25
Marker121469	165.674	Cma_Chr04	17241087	A	C	C	17	0,17	A	11	11,0	C	18	0,18	M	22	9,13	A	51	49,2	C	16	0,16	M	37	15,22	A	25	25,0	M	25	10,15	A	20	19,1	C	25	1,24	C	29	0,29	M	50	20,30	M	54	26,28	M	16
Marker121202	166.174	Cma_Chr04	17147490	C	G	C	20	20,0	G	18	0,18	C	4	4,0	G	2	0,2	G	5	0,5	N	.	.	C	2	2,0	G	4	0,4	S	6	3,3	G	7	0,7	S	6	4,2	S	6	5,1	S	5	1,4	G	12	0,12	N	.
Marker121201	166.174	Cma_Chr04	17147479	T	C	T	17	17,0	C	18	0,18	T	4	4,0	C	2	0,2	C	5	0,5	N	.	.	T	2	2,0	C	4	0,4	Y	6	3,3	C	7	0,7	Y	6	4,2	Y	6	5,1	Y	5	1,4	C	12	0,12	N	.
Marker121861	166.685	Cma_Chr04	17342868	C	G	G	12	0,12	C	15	15,0	G	25	0,25	S	17	5,12	C	18	17,1	G	12	0,12	S	18	2,16	C	17	17,0	S	22	9,13	C	19	19,0	G	32	1,31	G	9	0,9	S	19	8,11	S	16	12,4	S	4
Marker121302	166.685	Cma_Chr04	17173190	C	T	C	21	21,0	T	25	0,25	C	11	11,0	Y	8	4,4	T	8	0,8	C	10	10,0	N	.	.	C	1	1,0	C	7	7,0	T	18	0,18	C	26	26,0	C	1	1,0	C	2	2,0	T	4	0,4	C	1
Marker121199	166.685	Cma_Chr04	17147389	A	T	A	14	14,0	T	17	0,17	A	4	4,0	T	2	0,2	T	3	0,3	N	.	.	A	2	2,0	T	4	0,4	W	5	2,3	T	2	0,2	W	4	2,2	A	4	4,0	T	3	0,3	T	11	0,11	N	.
Marker121198	166.685	Cma_Chr04	17147368	A	T	A	12	12,0	T	14	0,14	A	4	4,0	T	2	0,2	T	3	0,3	N	.	.	A	2	2,0	T	4	0,4	W	5	2,3	T	2	0,2	W	4	2,2	A	4	4,0	T	3	0,3	T	11	0,11	N	.
Marker121582	167.685	Cma_Chr04	17275761	T	C	C	13	0,13	T	13	13,0	C	29	0,29	Y	20	9,11	T	18	18,0	C	18	0,18	Y	20	4,16	T	17	17,0	Y	43	11,32	T	52	51,0	C	26	0,26	C	12	0,12	Y	15	12,3	Y	30	16,14	Y	16
Marker121689	168.185	Cma_Chr04	17311674	C	T	T	12	0,12	C	13	13,0	T	30	2,28	Y	6	2,4	C	12	12,0	Y	14	2,12	Y	13	7,6	C	3	3,0	Y	18	6,12	C	22	22,0	T	24	0,23	T	4	0,4	Y	6	2,4	Y	20	5,15	Y	4
Marker121860	168.185	Cma_Chr04	17342849	T	A	A	12	0,12	T	15	15,0	A	25	0,25	W	17	5,12	T	18	17,1	A	12	0,12	W	18	2,16	T	19	19,0	W	22	9,13	T	19	19,0	A	32	1,31	A	9	0,9	W	19	8,11	W	16	12,4	W	4
Marker121859	168.185	Cma_Chr04	17342829	C	G	G	13	0,13	C	14	14,0	G	25	0,25	S	17	5,12	C	18	17,1	G	12	0,12	S	18	2,16	C	19	19,0	S	22	9,13	C	19	19,0	G	32	1,31	G	9	0,9	S	19	8,11	S	16	12,4	S	4
Marker121577	168.185	Cma_Chr04	17271130	C	A	A	23	0,23	C	17	17,0	A	3	0,3	M	11	3,8	C	34	34,0	A	17	1,16	M	20	7,13	C	18	18,0	M	22	12,10	C	23	23,0	A	50	1,49	A	10	0,10	M	33	15,18	M	28	11,17	M	18
Marker121809	168.185	Cma_Chr04	17333410	C	G	G	13	0,13	C	19	19,0	G	2	0,2	G	4	0,4	C	6	6,0	G	2	0,2	S	6	3,3	C	3	3,0	S	8	3,5	C	13	13,0	G	4	1,3	N	.	.	S	6	1,5	S	4	2,2	S	8
Marker121808	168.185	Cma_Chr04	17333371	T	C	C	15	0,15	T	21	21,0	C	2	0,2	C	4	0,4	T	6	6,0	C	2	0,2	Y	6	3,3	T	3	3,0	Y	8	3,5	T	13	13,0	C	4	1,3	N	.	.	Y	6	1,5	Y	4	1,2	Y	8
Marker121575	168.185	Cma_Chr04	17268734	T	C	C	16	0,16	T	21	20,1	Y	4	1,3	Y	7	2,5	T	21	21,0	C	5	0,5	Y	28	7,21	T	13	13,0	Y	22	9,13	T	3	3,0	C	14	0,14	C	12	0,12	Y	38	12,26	Y	36	14,22	Y	15
Marker121588	168.185	Cma_Chr04	17275920	C	T	T	23	0,23	C	12	12,0	T	27	0,27	Y	20	9,11	C	18	17,1	T	17	0,17	Y	20	4,16	C	17	17,0	Y	43	11,32	C	52	52,0	T	25	0,25	T	12	0,12	Y	15	12,3	Y	26	16,10	Y	16
Marker121583	168.185	Cma_Chr04	17275791	T	C	C	17	0,17	T	15	15,0	C	29	0,29	Y	20	9,11	T	18	18,0	C	18	0,18	Y	20	4,16	T	17	17,0	Y	43	11,32	T	52	52,0	C	26	0,26	C	12	0,12	Y	15	12,3	Y	30	16,14	Y	16
Marker121966	168.685	Cma_Chr04	17701695	T	G	T	14	14,0	G	19	1,18	T	27	27,0	K	28	14,14	G	91	0,91	T	21	21,0	K	104	32,71	G	50	1,49	K	73	38,35	K	28	2,26	T	49	49,0	T	33	32,0	K	98	37,61	K	96	48,48	K	63
Marker121646	168.685	Cma_Chr04	17302283	C	T	C	16	16,0	T	18	0,18	C	15	15,0	Y	27	10,17	T	55	0,55	C	26	26,0	Y	72	31,41	T	48	2,46	Y	32	18,14	T	31	0,31	C	34	33,1	Y	24	22,2	Y	64	36,28	Y	85	43,42	Y	37
Marker121728	168.685	Cma_Chr04	17318036	G	A	G	16	16,0	A	17	0,17	G	19	19,0	R	17	8,9	A	43	0,43	G	29	29,0	R	52	29,23	A	20	0,20	R	55	28,27	A	32	0,32	G	56	56,0	G	22	22,0	R	39	11,28	R	24	8,16	R	23
Marker121727	168.685	Cma_Chr04	17318014	G	A	A	14	0,14	G	16	16,0	A	19	0,19	R	17	9,8	G	43	43,0	A	29	0,29	R	52	23,29	G	20	20,0	R	55	27,28	G	32	32,0	A	56	0,56	A	22	0,22	R	39	28,11	R	24	16,8	R	23
Marker121502	168.685	Cma_Chr04	17245381	G	C	C	18	0,18	G	20	20,0	C	16	0,16	S	39	27,12	G	33	33,0	C	18	0,18	S	21	5,16	G	24	24,0	S	45	25,20	G	64	64,0	C	30	0,30	C	20	0,20	S	30	14,16	S	41	18,23	S	12
Marker121501	168.685	Cma_Chr04	17245361	T	C	C	18	0,18	T	21	21,0	C	18	0,18	Y	40	27,13	T	33	32,0	C	18	0,18	Y	21	5,16	T	24	24,0	Y	46	25,21	T	64	64,0	C	31	0,31	C	21	0,21	Y	30	14,16	Y	41	18,23	Y	14
Marker121500	168.685	Cma_Chr04	17245300	G	C	C	14	0,14	G	23	23,0	C	18	0,18	S	40	26,13	G	33	33,0	C	18	0,18	S	23	5,18	G	24	24,0	S	46	26,20	G	64	64,0	C	30	0,30	C	21	0,21	S	29	14,15	S	41	18,23	S	14
Marker121420	168.685	Cma_Chr04	17223426	C	T	T	20	0,20	C	15	15,0	T	10	0,10	Y	12	5,7	C	26	26,0	T	9	0,9	Y	15	11,4	C	29	29,0	Y	22	11,11	C	26	25,1	T	17	0,17	T	10	0,10	Y	35	22,13	Y	29	17,12	Y	24
Marker121940	169.185	Cma_Chr04	17361837	A	G	G	11	0,11	A	19	19,0	G	3	0,3	R	5	3,2	A	15	15,0	R	11	1,10	R	16	6,10	A	8	8,0	R	22	12,10	A	8	8,0	G	8	0,8	G	13	0,13	R	22	17,5	R	30	16,14	R	15
Marker121691	169.685	Cma_Chr04	17311865	T	C	C	11	0,11	T	24	24,0	C	30	2,28	Y	6	2,4	T	12	12,0	Y	14	2,12	Y	13	7,6	T	3	3,0	Y	18	6,12	T	22	22,0	C	24	0,24	C	4	0,4	Y	6	2,4	Y	20	5,15	Y	4
Marker122223	170.185	Cma_Chr04	17977781	C	T	T	12	0,12	C	14	14,0	T	22	0,22	Y	23	13,10	C	42	42,0	T	13	0,13	Y	49	32,17	C	32	32,0	Y	24	9,15	C	40	40,0	T	26	0,26	T	24	1,23	Y	28	16,12	Y	27	16,11	Y	7
Marker122161	170.685	Cma_Chr04	17950218	C	T	T	17	0,17	C	12	12,0	T	1	0,1	Y	3	1,2	C	9	9,0	T	6	1,5	Y	8	4,4	C	9	9,0	Y	20	5,15	C	11	11,0	T	10	0,10	T	8	0,8	Y	10	4,6	Y	21	14,7	Y	9
Marker122016	172.185	Cma_Chr04	17813047	A	T	A	16	16,0	T	19	0,19	A	5	5,0	W	7	2,5	T	6	0,6	A	13	13,0	W	16	13,3	T	26	0,26	W	8	5,3	T	35	1,34	A	9	9,0	A	10	10,0	W	6	2,4	W	8	4,4	W	8
Marker122495	173.185	Cma_Chr04	18179479	A	C	C	17	0,17	A	20	20,0	C	12	0,12	M	9	2,7	A	16	16,0	C	22	0,22	M	8	4,4	A	21	21,0	M	28	18,9	A	21	21,0	C	30	0,30	C	1	0,1	M	15	6,9	M	24	12,12	M	26
Marker122121	173.685	Cma_Chr04	17940653	C	T	T	16	0,16	C	18	18,0	T	5	0,5	Y	11	5,6	C	5	5,0	N	.	.	Y	6	3,3	C	7	7,0	C	1	1,0	C	12	12,0	T	9	0,9	T	2	0,2	Y	7	4,3	T	9	0,9	T	2
Marker122204	173.685	Cma_Chr04	17958900	A	G	G	13	0,13	A	12	12,0	G	20	0,20	R	5	2,3	A	19	19,0	G	4	0,4	R	8	1,7	A	12	12,0	R	9	6,3	A	12	12,0	G	19	0,19	G	22	1,21	R	5	4,1	R	9	7,1	R	7
Marker122652	174.185	Cma_Chr04	18334002	A	G	G	11	0,11	A	24	24,0	G	2	0,2	R	3	1,2	A	4	4,0	G	7	0,7	A	3	3,0	A	6	6,0	R	17	14,3	A	18	18,0	G	6	0,6	G	4	0,4	G	4	0,4	R	2	1,1	G	4
Marker122320	174.185	Cma_Chr04	18115704	A	G	G	19	0,19	A	19	19,0	G	32	0,32	R	13	8,5	A	10	10,0	G	28	0,28	R	35	13,22	A	8	7,0	R	27	3,24	A	14	14,0	G	50	0,50	G	22	0,22	R	45	8,37	G	54	3,51	R	34
Marker122046	174.185	Cma_Chr04	17837975	T	C	T	13	13,0	C	21	0,21	T	12	12,0	Y	21	9,12	C	96	1,95	T	24	24,0	Y	73	31,42	C	37	0,37	Y	36	12,23	C	33	0,33	T	29	29,0	T	32	32,0	Y	125	48,77	Y	112	67,45	Y	26
Marker122137	174.185	Cma_Chr04	17943392	C	T	T	22	0,22	C	24	24,0	T	15	0,15	Y	12	4,8	C	30	30,0	T	25	0,25	Y	37	19,18	Y	13	12,1	Y	35	18,17	C	25	25,0	T	29	0,29	T	23	0,23	Y	20	14,6	Y	30	7,23	Y	23
Marker122406	174.69	Cma_Chr04	18126736	A	G	G	16	0,16	A	20	20,0	G	3	0,3	R	3	1,2	N	.	.	G	2	0,2	A	4	4,0	A	4	4,0	R	8	4,4	A	25	25,0	G	3	0,3	N	.	.	G	1	0,1	A	2	2,0	R	8
Marker122136	174.69	Cma_Chr04	17943218	G	A	A	10	0,10	G	25	25,0	A	2	0,2	N	.	.	G	5	5,0	A	5	0,5	R	10	2,8	G	2	2,0	R	14	4,10	G	19	19,0	A	10	0,10	A	5	0,5	G	1	1,0	R	5	2,3	R	3
Marker122240	174.69	Cma_Chr04	18098902	T	C	C	14	0,14	T	16	16,0	C	23	0,23	Y	21	6,15	T	64	64,0	C	26	0,26	Y	60	31,29	T	21	21,0	Y	34	19,15	T	16	16,0	C	37	0,37	C	19	0,19	Y	34	12,22	Y	49	14,35	Y	24
Marker122909	175.191	Cma_Chr04	18490394	T	C	T	17	17,0	C	19	0,19	T	15	15,0	Y	11	6,5	C	36	0,36	T	8	8,0	Y	24	11,13	C	26	0,26	Y	27	13,14	C	10	0,10	T	20	20,0	T	17	17,0	Y	31	16,15	Y	23	13,10	Y	18
Marker122545	175.191	Cma_Chr04	18189002	T	G	G	22	0,22	T	20	20,0	G	16	1,15	K	10	8,2	T	25	25,0	G	13	1,12	K	7	5,2	T	2	2,0	K	14	9,5	T	85	85,0	G	12	0,12	G	4	0,4	K	20	14,6	K	21	12,9	K	22
Marker122544	175.191	Cma_Chr04	18188980	A	C	C	22	0,22	A	18	18,0	C	16	1,15	M	10	8,2	A	25	25,0	M	13	1,12	M	7	5,2	A	2	2,0	M	14	9,5	A	85	85,0	C	12	0,12	C	4	0,4	M	21	14,7	M	21	12,9	M	22
[truncated: 6,408 more rows]
[truncated: 262 more columns]
